# Supplementary material for: Haplotype-based phylogenetic analysis uncovers the tetraploid progenitor of sweet potato
Source: Research Square preprint supplement (doi:10.21203/rs.3.rs-750500/v1), 2021-08-10
Supplement: Supplementary file 3 [file 7708599ecf387f66dd06397a.xlsx]

## Sheet: Table 1
Supplementary Table 1 The detailed information of plant materials used in this study
Name	ID	Species	Note	Ploid	Source	T-DNA1_PCR	T-DNA2_PCR	T-DNA1_WGS	T-DNA2_WGS	Storage root formation	Origin	Latitude	Longitude	Locality
Y22	CIP698014	I. trifida		2	Li M, Yang S, Xu W, et al. The wild sweetpotato (Ipomoea trifida) genome provides insights into storage root development[J]. BMC plant biology, 2019, 19(1): 119.	-	+	-	+	Yes	Unknown
Y2F5	PI634798	I. triloba		2	This study			-	-	No	Unknown
430406	CIP430406	I. trifida		2	This study	-	+	-	-	Unkown	Unknown
553012	PI553012	I. sp		2	This study	++++	-	+	-	Unkown	Unknown
561544	PI561544	I. trifida		2	This study	--	++	-	-	Unkown	Venezuela	6.76775	-64.9802
403270	CIP403270	I. batatas 4x	403270	4	This study	---+	-	+	-	No	Colombia	4.6102	-75.6436	1 Km Se Circacia-calarca
518474	PI518474	I. batatas 4x var. Apiculata	518474	4	This study	++++	-	+	-	No	Mexico	19.2	-96.1667	1 km N of Playa Norte, Veracruz Province
PI046A	PI561246	I. batatas 4x	PI046	4	This study	-	-	-	+	No	Ecuador	-0.95	-79.6667	Entr Esmeralda D Rosa Zarate, Esmeralda, Esmeraldas Province
PI047A	PI561247	I. batatas 4x	PI047	4	This study	-	+	-	+	No	Ecuador	-0.866667	-79.1667	Entr A Sua D Esmeralda, Sua, Esmeraldas, Province
PI048A	PI561248	I. batatas 4x	PI048	4	This study	-	+	-	+	No	Ecuador	-0.833333	-79.75	Km 5 Ant D Esmeralda Quininde, Esmeralda, Esmeraldas Province
PI055A	PI561255	I. batatas 4x	PI055	4	This study	-	+	-	+	No	Ecuador	-2.06667	-80.0833	Via Julio Moreno, Guayaquil, Guayas Province
PI058A	PI561258	I. batatas 4x	PI058	4	This study	--	++	--	+	No	Ecuador	-3.24884	-79.8214	El Guabo, El Oro Province
PI061A	PI561261	I. batatas 4x	PI061	4	This study	-	+	-	+	No	Ecuador	-3.89637	-80.0872	Puyango, Loja Province
Y413	CIP695141	I. batatas 4x	Y413	4	This study	-	+	+	+	No	Peru				CIP
Y450	CIP695150	I. batatas 4x	Y450	4	This study	-	-	-	-	No	Peru				CIP
Tai6	Taizhong6	I. batatas 6x		6	Yang J, Moeinzadeh M H, Kuhl H, et al. Haplotype-resolved sweet potato genome traces back its hexaploidization history[J]. Nature plants, 2017, 3(9): 696-703.	+	+	+	+	Yes	China	36.202	117.186
Xu1802	Xushu18	I. batatas 6x		6	This study	+	+	+	+	Yes	China	34.2836	117.303	Xuzhou Sweetpotato Research Center, Jiangsu. China
Yzi7-3	Yuzi7	I. batatas 6x		6	This study	+	+	+	+	Yes	China	29.8267	106.431	Southwest University, Chongqing, China
Y263	Yuzi263	I. batatas 6x		6	This study	+	+	+	+	Yes	China	29.8267	106.431	Southwest University, Chongqing, China
Y601	Y601	I. batatas 6x		6	This study	+	+	+	+	Yes	Unknown
Beauregard	Beauregard	I. batatas 6x	PI566613	6	Wu S, Lau K H, Cao Q, et al. Genome sequences of two diploid wild relatives of cultivated sweetpotato reveal targets for genetic improvement[J]. Nature communications, 2018, 9(1): 1-12.			+	-	Yes	United States	30.48	-91.1766	Louisiana State University	https://www.diynetwork.com/how-to/outdoors/gardening/growing-beauregard-sweet-potatoes
Tanzania	Tanzania	I. batatas 6x		6	Wu S, Lau K H, Cao Q, et al. Genome sequences of two diploid wild relatives of cultivated sweetpotato reveal targets for genetic improvement[J]. Nature communications, 2018, 9(1): 1-12.			+	+	Yes	Uganda	0.609764	33.4646	Iganga, Uganda	Mwanga ROM et al.1995
NK259L	NK259L	I. batatas 6x		6	Wu S, Lau K H, Cao Q, et al. Genome sequences of two diploid wild relatives of cultivated sweetpotato reveal targets for genetic improvement[J]. Nature communications, 2018, 9(1): 1-12.			+	+	Yes	Uganda	0.529021	32.6124	National Crops Resources Research Institute (NaCRRI), Namulonge, P.O. Box 7084, Kampala, Uganda	Zhou Chenxi et al.2018
Kabode	Kabode (NASPOT 10 O)	I. batatas 6x	NASPOT 10 O	6	Wu S, Lau K H, Cao Q, et al. Genome sequences of two diploid wild relatives of cultivated sweetpotato reveal targets for genetic improvement[J]. Nature communications, 2018, 9(1): 1-12.			+	+	Yes	Uganda	0.529021	32.6124	National Crops Resources Research Institute (NaCRRI), Namulonge, P.O. Box 7084, Kampala, Uganda	Mwanga ROM et al.2009,https://research.cip.cgiar.org/sweetpotato-catalog/cip_sp_catalogue/index.php?doi=10.18730/SEXGK
Magabali	Magabali	I. batatas 6x		6	Wu S, Lau K H, Cao Q, et al. Genome sequences of two diploid wild relatives of cultivated sweetpotato reveal targets for genetic improvement[J]. Nature communications, 2018, 9(1): 1-12.			+	+	Yes	Uganda	0.620612	30.2707	Kabarole District, Uganda	Mwanga ROM et al.1995
RedResisto	Resisto	I. batatas 6x		6	Wu S, Lau K H, Cao Q, et al. Genome sequences of two diploid wild relatives of cultivated sweetpotato reveal targets for genetic improvement[J]. Nature communications, 2018, 9(1): 1-12.			+	+	Yes	United States	32.7853	-79.994	Us Vegetable Lab.-charleston	www.genesys-pgr.org
Wagabolige	Wagabolige	I. batatas 6x		6	Wu S, Lau K H, Cao Q, et al. Genome sequences of two diploid wild relatives of cultivated sweetpotato reveal targets for genetic improvement[J]. Nature communications, 2018, 9(1): 1-12.			+	-	Yes	Uganda	0.605375	33.4683	Iganga, Uganda	Mwanga ROM et al.1995
NASPOT5	NASPOT 5	I. batatas 6x		6	Wu S, Lau K H, Cao Q, et al. Genome sequences of two diploid wild relatives of cultivated sweetpotato reveal targets for genetic improvement[J]. Nature communications, 2018, 9(1): 1-12.			+	-	Yes	Uganda	0.529021	32.6124	National Crops Resources Research Institute (NaCRRI), Namulonge, P.O. Box 7084, Kampala, Uganda	Mwanga ROM et al.2003
NASPOT11	NASPOT 11	I. batatas 6x		6	Wu S, Lau K H, Cao Q, et al. Genome sequences of two diploid wild relatives of cultivated sweetpotato reveal targets for genetic improvement[J]. Nature communications, 2018, 9(1): 1-12.			+	+	Yes	Uganda	0.529021	32.6124	National Crops Resources Research Institute (NaCRRI), Namulonge, P.O. Box 7084, Kampala, Uganda	Mwanga ROM et al.2011
Mugande	Mugande	I. batatas 6x		6	Wu S, Lau K H, Cao Q, et al. Genome sequences of two diploid wild relatives of cultivated sweetpotato reveal targets for genetic improvement[J]. Nature communications, 2018, 9(1): 1-12.			+	+	Yes	Rwanda	1.34515	32.4542	Uganda
Huarmeyano	Huarmeyano	I. batatas 6x	CIP420020	6	Wu S, Lau K H, Cao Q, et al. Genome sequences of two diploid wild relatives of cultivated sweetpotato reveal targets for genetic improvement[J]. Nature communications, 2018, 9(1): 1-12.			+	+	Yes	Peru	-10.0696	-78.1516	Huarmey, Peru	www.genesys-pgr.org
NewKawogo	New Kawogo	I. batatas 6x		6	Wu S, Lau K H, Cao Q, et al. Genome sequences of two diploid wild relatives of cultivated sweetpotato reveal targets for genetic improvement[J]. Nature communications, 2018, 9(1): 1-12.			+	+	Yes	Uganda	0.330288	32.5756	tall grassland agroecological zone near Kampala, Uganda	Mwanga ROM et al.2001
NASPOT1	NASPOT 1	I. batatas 6x		6	Wu S, Lau K H, Cao Q, et al. Genome sequences of two diploid wild relatives of cultivated sweetpotato reveal targets for genetic improvement[J]. Nature communications, 2018, 9(1): 1-12.			+	+	Yes	Uganda	0.529021	32.6124	National Crops Resources Research Institute (NaCRRI), Namulonge, P.O. Box 7084, Kampala, Uganda	Mwanga ROM et al.2003
Ejumula	Ejumula	I. batatas 6x		6	Wu S, Lau K H, Cao Q, et al. Genome sequences of two diploid wild relatives of cultivated sweetpotato reveal targets for genetic improvement[J]. Nature communications, 2018, 9(1): 1-12.			+	+	Yes	Uganda	1.9246	33.9841	Katakwi District, Uganda	Mwanga ROM et al.2007
NASPOT5-58	NASPOT 5/58	I. batatas 6x		6	Wu S, Lau K H, Cao Q, et al. Genome sequences of two diploid wild relatives of cultivated sweetpotato reveal targets for genetic improvement[J]. Nature communications, 2018, 9(1): 1-12.			+	-	Yes	Uganda	0.529021	32.6124	National Crops Resources Research Institute (NaCRRI), Namulonge, P.O. Box 7084, Kampala, Uganda
Dimbuka-Bukulula	Dimbuka-Bukulula	I. batatas 6x		6	Wu S, Lau K H, Cao Q, et al. Genome sequences of two diploid wild relatives of cultivated sweetpotato reveal targets for genetic improvement[J]. Nature communications, 2018, 9(1): 1-12.			+	+	Yes	Uganda	-0.180955	31.8713	Bukulula subcounty in Masaka District, Uganda	Mwanga ROM et al.2009
SPK004	Kakamega (SPK004)	I. batatas 6x		6	Wu S, Lau K H, Cao Q, et al. Genome sequences of two diploid wild relatives of cultivated sweetpotato reveal targets for genetic improvement[J]. Nature communications, 2018, 9(1): 1-12.			+	+	Yes	Kenya	-1.24951	36.6578	Muguga, Kenya	Mwanga ROM et al.2007
NASPOT7	NASPOT 7	I. batatas 6x		6	Wu S, Lau K H, Cao Q, et al. Genome sequences of two diploid wild relatives of cultivated sweetpotato reveal targets for genetic improvement[J]. Nature communications, 2018, 9(1): 1-12.			+	+	Yes	Uganda	0.529021	32.6124	National Crops Resources Research Institute (NaCRRI), Namulonge, P.O. Box 7084, Kampala, Uganda	Mwanga ROM et al.2009
Note: T-DNA1_WGS: IbT-DNA1 detection by WGS mapping, T-DNA2_WGS: IbT-DNA2 detection by WGS mapping; T-DNA1_WGS: IbT-DNA1 detection by PCR screening, T-DNA2_WGS: IbT-DNA2 detection by PCR screening

## Sheet: Table 2
Supplementary Table 2 Summary of haplotype blocks of five representative sweet potato cultivars/landraces
Material	Huarmeyano	NASPOT5/58	NK259L	Y601	Yuzi7
MeanLength	598.55	620.771	706.423	753.883	439.88
GenomeCoverage	0.631313	0.630491	0.666344	0.867089	0.718138
BlockNumber	491500	473290	439555	535969	760769
Ploid2_Number	69518	66266	61683	71453	105859
Ploid3_Number	123107	114174	102801	127112	212370
Ploid4_Number	152249	149557	132712	151737	220439
Ploid5_Number	99433	96168	90433	100757	134634
Ploid6_Number	47193	47125	51926	84910	87467
Ploid2_Percent	0.14144	0.140011	0.140331	0.133316	0.139147
Ploid3_Percent	0.250472	0.241235	0.233875	0.237163	0.279152
Ploid4_Percent	0.309764	0.315994	0.301924	0.283108	0.289758
Ploid5_Percent	0.202305	0.20319	0.205738	0.18799	0.176971
Ploid6_Percent	0.0960183	0.099569	0.118133	0.158423	0.114972
Ploid2_MeanLength	922.422	966.683	1055.29	1188.61	659.786
Ploid3_MeanLength	660.78	684.335	756.643	737.586	462.011
Ploid4_MeanLength	480.584	495.728	554.506	515.938	349.024
Ploid5_MeanLength	392.918	401.559	473.244	483.235	308.087
Ploid6_MeanLength	772.966	824.54	986.951	1158.83	551.846
Ploid2_GenomeCoverage	0.137609	0.137466	0.139687	0.182255	0.149883
Ploid3_GenomeCoverage	0.174566	0.16767	0.16692	0.201196	0.210555
Ploid4_GenomeCoverage	0.157016	0.1591	0.15792	0.168	0.165106
Ploid5_GenomeCoverage	0.0838402	0.0828706	0.0918401	0.104485	0.0890121
Ploid6_GenomeCoverage	0.0782813	0.0833841	0.109977	0.211153	0.103581
Note: The genome coverage is not accurate because duplicated blocks are not removed

## Sheet: Table 3
Supplementary Table 3 Summary of haplotype blocks of Ipomoea batatas 4x
Accession	CIP403270	PI518474	PI561246	PI561247	PI561248	PI561255	PI561258	PI561261	CIP695141	CIP695150
MeanLength	685.158	1225.13	1032.69	907.794	1111.54	1103.92	1054.91	964.273	1057.44	1043.86
GenomeCoverage	0.797788	1.01296	0.909297	0.872619	0.910388	0.915478	0.918312	0.887158	0.864335	0.884691
BlockNumber	542596	385290	410313	447937	381665	386446	405654	428727	380895	394939
Ploid2_Number	169875	143146	143225	159824	133928	131468	141851	152342	122447	124961
Ploid3_Number	209601	157126	150054	164311	139048	142453	148626	159131	140154	141063
Ploid4_Number	163120	85018	117034	123802	108689	112525	115177	117254	118294	128915
Ploid2_Percent	0.313078	0.371528	0.349063	0.3568	0.350905	0.340198	0.349685	0.355336	0.321472	0.316406
Ploid3_Percent	0.386293	0.407812	0.365706	0.366817	0.364319	0.368623	0.366386	0.371171	0.36796	0.357177
Ploid4_Percent	0.300629	0.22066	0.285231	0.276383	0.284776	0.291179	0.283929	0.273493	0.310569	0.326417
Ploid2_MeanLength	738.517	1174.32	1023.18	926.329	1085.37	1072.88	1035.2	975.547	1085.44	1084.6
Ploid3_MeanLength	554.13	868.166	789.471	715.213	848.515	849.998	813.314	748.729	814.28	807.253
Ploid4_MeanLength	797.955	1970.42	1356.17	1139.46	1480.27	1461.65	1390.93	1242.15	1316.56	1263.26
Ploid2_GenomeCoverage	0.269222	0.360733	0.314478	0.317707	0.31194	0.302686	0.315121	0.318925	0.285216	0.290847
Ploid3_GenomeCoverage	0.249244	0.292733	0.254217	0.252187	0.253189	0.259842	0.259402	0.255682	0.244906	0.244367
Ploid4_GenomeCoverage	0.279322	0.359493	0.340602	0.302724	0.34526	0.35295	0.34379	0.312552	0.334213	0.349476
Note: The genome coverage is not accurate because duplicated blocks are not removed

## Sheet: Table 4
Supplementary Table 4 Summary of original extracted syntenic haplotype blocks between sweet potato and Ipomoea batatas 4x
Accession	CIP403270	PI518474	PI561246	PI561247	PI561248	PI561255	PI561258	PI561261	CIP695141	CIP695150	CIP403270	PI518474	PI561246	PI561247	PI561248	PI561255	PI561258	PI561261	CIP695141	CIP695150	CIP403270	PI518474	PI561246	PI561247	PI561248	PI561255	PI561258	PI561261	CIP695141	CIP695150	CIP403270	PI518474	PI561246	PI561247	PI561248	PI561255	PI561258	PI561261	CIP695141	CIP695150	CIP403270	PI518474	PI561246	PI561247	PI561248	PI561255	PI561258	PI561261	CIP695141
Reference	Huarmeyano	Huarmeyano	Huarmeyano	Huarmeyano	Huarmeyano	Huarmeyano	Huarmeyano	Huarmeyano	Huarmeyano	Huarmeyano	NASPOT5/58	NASPOT5/58	NASPOT5/58	NASPOT5/58	NASPOT5/58	NASPOT5/58	NASPOT5/58	NASPOT5/58	NASPOT5/58	NASPOT5/58	NK259L	NK259L	NK259L	NK259L	NK259L	NK259L	NK259L	NK259L	NK259L	NK259L	Y601	Y601	Y601	Y601	Y601	Y601	Y601	Y601	Y601	Y601	Yuzi7	Yuzi7	Yuzi7	Yuzi7	Yuzi7	Yuzi7	Yuzi7	Yuzi7	Yuzi7
MeanLength	396.257	435.9	437.588	423.128	443.649	446.918	440.354	432.916	457.221	454.479	407.299	451.056	454.106	433.338	460.831	462.568	454.417	444.889	470.857	470.712	454.052	500.28	508.45	487.34	516.515	519.25	504.696	496.43	535.207	533.058	500.439	529.679	552.941	531.58	563.765	566.408	555.418	537.607	591.625	593.158	352.143	354.453	371.031	361.874	370.998	375.534	375.253	366.422	385.934
GenomeCoverage	0.601625	0.694285	0.651828	0.634423	0.645479	0.654476	0.657203	0.645637	0.629621	0.643615	0.604067	0.699493	0.659077	0.633619	0.652407	0.659541	0.660685	0.648384	0.63116	0.649015	0.665914	0.751559	0.717141	0.696774	0.710329	0.718961	0.713901	0.703475	0.696291	0.714538	0.913905	0.995165	0.971405	0.941113	0.965065	0.975608	0.977013	0.944939	0.959157	0.994273	0.720512	0.799204	0.773328	0.750521	0.758833	0.773004	0.783597	0.76014	0.74528
BlockNumber	707504	742216	694141	698694	677988	682410	695468	694967	641701	659921	691117	722658	676330	681368	659715	664425	677516	679141	624640	642509	683427	700051	657258	666254	640850	645221	659155	660344	606246	624641	851000	875512	818655	824998	797697	802650	819710	819065	755480	781114	953459	1050700	971255	966463	953135	959206	973079	966700	899883
Ploid2_2_Number	43073	47771	43772	44756	42218	41524	43961	44669	38019	38624	42377	46384	42527	43801	41305	40014	42293	43870	36982	37223	41251	44664	41025	42819	39210	39400	40881	41916	35454	36474	50760	51915	48596	50433	46854	45978	48477	49413	43586	44336	55164	61866	56214	58212	54734	53621	56212	57759	48892
Ploid2_3_Number	44063	40703	37862	38131	36910	37861	38230	38619	38742	38780	43312	39719	37163	37054	35463	36734	37031	37653	37804	38009	42348	37921	35611	35761	34117	35353	35877	36442	35739	36194	49696	44367	42069	42733	39970	41306	41696	42168	40516	42440	51835	50288	46010	46882	45393	46298	46444	46947	47178
Ploid2_4_Number	35278	32191	35481	32403	34920	35806	35523	32852	38198	40840	34032	31035	34427	31474	34011	34930	34609	32076	36601	39676	32938	29292	32258	30255	32437	32845	32923	30183	34461	37213	38973	34253	37482	35761	37418	37556	37878	35501	37207	40793	41629	42321	45257	40716	44817	45889	44966	41091	46466
Ploid3_2_Number	60502	70965	64476	68169	62988	60603	63896	66553	52785	53935	57404	66806	60689	64245	58969	57413	60521	63046	49273	51046	54992	62976	57154	60649	55596	53699	56784	59173	46387	47494	67904	77455	70004	73876	68319	66174	69783	72275	58036	59552	91303	109415	98214	102753	95543	92836	98174	101281	81259
Ploid3_3_Number	70052	66357	60889	61657	59159	61371	61570	62566	58173	58085	66355	62308	57162	58363	55687	57500	58179	59399	55000	54990	63148	58440	53913	55034	52221	54099	54759	55253	52690	52688	75546	70229	64018	64845	63105	65123	64586	65485	65913	66153	100850	98151	88578	89233	86773	89777	90119	90430	86653
Ploid3_4_Number	57090	55006	58566	53366	58188	60263	59596	54737	61768	66123	53268	51373	54951	49789	54446	56163	55173	50888	57906	61733	48987	45922	49772	45558	49569	51036	50209	46135	52951	56513	53482	53051	57244	51281	56377	57857	57503	52428	58200	63265	78187	85105	88027	78795	88071	90627	88560	81069	90537
Ploid4_2_Number	60963	76097	67065	70576	65405	63121	66830	69170	56989	58335	60182	75519	66469	70383	65081	62669	66848	69307	56228	57229	57067	70589	62852	65905	60352	58538	61832	64668	51695	52811	64376	81875	71482	74973	69945	67455	71587	73800	57576	59209	79517	103412	90676	93801	88425	85606	90022	92640	76725
Ploid4_3_Number	69963	71515	63159	66811	61088	62458	63563	65536	54513	54623	70111	71583	62997	66607	60525	61757	63535	64962	54448	54628	66766	67412	59547	62164	57387	58829	60118	61590	52070	51921	77916	77604	68899	70362	66768	68632	69453	70292	63542	63501	91868	95644	84281	87131	82195	83629	84961	87056	74546
Ploid4_4_Number	71851	71253	73749	68353	72759	75126	74015	69526	72357	76025	70605	69641	72264	66978	71282	73750	71985	68187	71384	75082	64648	62268	65317	60870	64817	66695	65930	61608	65785	69435	66621	67726	70498	64439	70097	72015	70589	66060	72815	76648	90466	97317	98499	89827	97814	100605	98462	92139	97897
Ploid5_2_Number	35701	45153	38629	40894	38047	36763	38593	39884	35664	36308	34840	43608	38090	39609	37084	36241	38208	38977	34586	35571	34508	43356	37581	40033	36909	35433	37818	39131	33648	34233	39415	51803	44393	46598	43450	41867	44335	45505	37700	38150	45044	59517	51314	53006	49814	48655	51040	52306	46648
Ploid5_3_Number	38281	41385	34703	37604	33856	33279	34419	36144	29606	29324	37402	40893	33828	36666	32952	32863	34072	35386	28723	28352	38535	40959	34361	37505	33682	33270	34559	35764	28927	29109	46177	49297	42315	44148	40352	41287	42248	43623	36195	36014	49332	54375	45452	48611	44617	44579	45964	47286	39183
Ploid5_4_Number	47202	48128	48367	46005	47569	49015	48131	46342	43680	45854	45993	46726	46798	44534	46076	47332	46428	44914	42999	44734	45205	44458	45254	42792	44479	45754	45114	43538	41871	44044	48449	47125	48712	45276	47920	49272	48700	46060	48212	50630	58355	61319	61640	57579	61178	62870	61631	58707	57794
Ploid6_2_Number	20687	23720	20304	21363	19574	19130	20441	20942	19156	19532	21024	24382	20695	22132	20198	19920	20744	21629	19490	19720	26585	29582	25107	27203	24672	23964	25411	26328	23332	23709	49036	56452	47859	51484	46281	45235	48040	50281	41827	42623	33122	42612	35381	36999	34304	33486	35288	36535	32666
Ploid6_3_Number	21758	23216	17891	19408	16933	17043	17733	18688	16095	16447	22293	23707	18712	19891	17928	17925	18669	19857	16879	16816	28569	29287	23207	25043	21966	22110	23025	24473	20529	20678	55714	57011	45730	49686	43610	44130	46121	48108	38992	39769	34972	40716	31867	33753	30383	30442	31360	33143	28021
Ploid6_4_Number	31040	28756	29228	29198	28374	29047	28967	28739	25956	27086	31919	28974	29558	29842	28708	29214	29221	28990	26337	27700	37880	32925	34299	34663	33436	34196	33915	34142	30707	32125	66935	55349	59354	59103	57231	58763	58714	58066	55163	58031	51815	48642	49845	49165	49074	50286	49876	48311	45418
Ploid2_2_Percent	0.0608802	0.0643627	0.0630592	0.0640567	0.0622695	0.060849	0.0632107	0.064275	0.0592472	0.0585282	0.0613167	0.0641853	0.0628791	0.0642839	0.0626104	0.0602235	0.0624236	0.0645963	0.0592053	0.0579338	0.060359	0.0638011	0.0624184	0.0642683	0.0611844	0.0610643	0.0620203	0.063476	0.0584812	0.0583919	0.0596475	0.0592967	0.0593608	0.0611311	0.0587366	0.0572828	0.0591392	0.0603285	0.0576931	0.05676	0.0578567	0.0588807	0.0578777	0.060232	0.0574252	0.0559014	0.0577671	0.0597486	0.0543315
Ploid2_3_Percent	0.0622795	0.0548398	0.0545451	0.0545747	0.0544405	0.0554813	0.0549702	0.0555695	0.0603739	0.0587646	0.0626696	0.0549624	0.054948	0.0543818	0.053755	0.0552869	0.054657	0.0554421	0.0605213	0.0591571	0.0619642	0.0541689	0.0541812	0.0536747	0.0532371	0.0547921	0.0544288	0.0551864	0.0589513	0.0579437	0.0583972	0.0506755	0.0513879	0.0517977	0.0501067	0.051462	0.0508668	0.0514831	0.0536295	0.0543327	0.0543652	0.0478614	0.0473717	0.0485088	0.0476249	0.048267	0.0477289	0.0485642	0.0524268
Ploid2_4_Percent	0.0498626	0.0433715	0.051115	0.0463765	0.0515053	0.0524699	0.0510778	0.0472713	0.0595262	0.0618862	0.049242	0.0429456	0.0509027	0.0461924	0.0515541	0.0525718	0.0510822	0.0472303	0.0585954	0.0617517	0.0481953	0.0418427	0.0490797	0.0454106	0.0506156	0.050905	0.0499473	0.045708	0.0568433	0.059575	0.0457967	0.0391234	0.0457849	0.0433468	0.0469075	0.04679	0.046209	0.0433433	0.0492495	0.0522241	0.043661	0.0402789	0.0465964	0.0421289	0.0470206	0.0478406	0.04621	0.0425065	0.0516356
Ploid3_2_Percent	0.0855147	0.0956123	0.092886	0.0975663	0.0929043	0.0888073	0.0918748	0.0957643	0.0822579	0.0817295	0.0830597	0.0924448	0.0897328	0.0942883	0.0893856	0.0864101	0.0893278	0.092832	0.0788822	0.0794479	0.0804651	0.0899592	0.0869582	0.0910298	0.0867535	0.0832257	0.0861467	0.0896094	0.0765151	0.0760341	0.0797932	0.0884682	0.085511	0.0895469	0.0856453	0.0824444	0.0851313	0.0882409	0.07682	0.0762398	0.0957598	0.104135	0.101121	0.106319	0.100241	0.0967842	0.10089	0.10477	0.0902995
Ploid3_3_Percent	0.0990129	0.0894039	0.0877185	0.0882461	0.0872567	0.0899327	0.0885303	0.0900273	0.0906544	0.0880181	0.0960112	0.0862206	0.0845179	0.0856556	0.0844107	0.086541	0.085871	0.087462	0.0880507	0.0855863	0.092399	0.0834796	0.0820271	0.0826021	0.0814871	0.0838457	0.0830745	0.0836731	0.0869119	0.0843493	0.0887732	0.0802148	0.078199	0.0786002	0.079109	0.081135	0.0787913	0.0799509	0.0872465	0.0846906	0.105773	0.0934149	0.0911995	0.0923295	0.0910396	0.0935951	0.0926122	0.0935451	0.0962936
Ploid3_4_Percent	0.0806921	0.0741105	0.0843719	0.0763796	0.0858245	0.0883091	0.0856919	0.078762	0.0962567	0.100198	0.0770752	0.071089	0.0812488	0.0730721	0.0825296	0.0845287	0.0814342	0.0749299	0.092703	0.0960811	0.0716785	0.0655981	0.0757267	0.0683793	0.0773488	0.0790985	0.0761718	0.0698651	0.0873424	0.0904728	0.0628461	0.0605943	0.0699244	0.0621589	0.0706747	0.0720825	0.0701504	0.0640096	0.0770371	0.0809933	0.0820035	0.0809984	0.0906322	0.0815292	0.0924014	0.0944813	0.0910101	0.0838616	0.10061
Ploid4_2_Percent	0.0861663	0.102527	0.0966158	0.101011	0.0964693	0.0924972	0.0960936	0.0995299	0.0888093	0.0883969	0.0870793	0.104502	0.0982789	0.103297	0.0986502	0.0943207	0.0986663	0.102051	0.0900166	0.0890711	0.0835012	0.100834	0.0956276	0.0989187	0.0941749	0.0907255	0.0938049	0.0979308	0.0852707	0.0845462	0.0756475	0.0935167	0.0873164	0.0908766	0.0876837	0.0840404	0.0873321	0.0901027	0.0762112	0.0758007	0.0833984	0.098422	0.0933596	0.097056	0.0927728	0.0892467	0.0925125	0.0958312	0.0852611
Ploid4_3_Percent	0.0988871	0.0963534	0.0909887	0.0956227	0.0901019	0.0915256	0.091396	0.0943009	0.0849508	0.082772	0.101446	0.0990552	0.0931454	0.0977548	0.0917442	0.092948	0.0937764	0.0956532	0.087167	0.0850229	0.097693	0.0962958	0.0905991	0.0933038	0.0895483	0.0911765	0.0912046	0.0932696	0.0858892	0.0831213	0.0915582	0.0886384	0.0841612	0.0852875	0.083701	0.0855068	0.0847287	0.0858198	0.0841081	0.0812954	0.0963523	0.0910288	0.0867754	0.0901545	0.0862365	0.0871857	0.0873115	0.0900548	0.0828397
Ploid4_4_Percent	0.101556	0.0960004	0.106245	0.0978297	0.107316	0.110089	0.106425	0.100042	0.112758	0.115203	0.102161	0.0963679	0.106847	0.0982993	0.10805	0.110998	0.106248	0.100402	0.11428	0.116858	0.0945939	0.0889478	0.099378	0.0913616	0.101142	0.103368	0.100022	0.0932968	0.108512	0.11116	0.0782855	0.0773559	0.0861144	0.0781081	0.0878742	0.0897215	0.0861146	0.0806529	0.0963824	0.0981265	0.0948819	0.0926211	0.101414	0.0929441	0.102623	0.104884	0.101186	0.0953129	0.108789
Ploid5_2_Percent	0.0504605	0.0608354	0.0556501	0.0585292	0.0561175	0.0538723	0.0554921	0.0573898	0.0555773	0.0550187	0.0504111	0.0603439	0.0563187	0.0581316	0.0562122	0.0545449	0.0563942	0.0573916	0.0553695	0.0553626	0.0504926	0.0619326	0.0571785	0.0600867	0.0575938	0.0549161	0.0573735	0.0592585	0.0555022	0.0548043	0.0463161	0.0591688	0.0542267	0.0564826	0.0544693	0.052161	0.0540862	0.0555573	0.049902	0.0488405	0.0472427	0.0566451	0.0528327	0.0548453	0.0522633	0.0507242	0.0524521	0.0541078	0.0518379
Ploid5_3_Percent	0.0541071	0.0557587	0.0499942	0.0538204	0.049936	0.0487669	0.0494904	0.0520082	0.0461368	0.0444356	0.0541182	0.0565869	0.050017	0.0538123	0.0499488	0.0494608	0.0502896	0.0521041	0.0459833	0.044127	0.056385	0.0585086	0.0522793	0.0562923	0.0525583	0.0515637	0.0524292	0.0541597	0.047715	0.0466012	0.054262	0.0563065	0.0516884	0.0535129	0.0505856	0.0514384	0.0515402	0.0532595	0.0479099	0.0461059	0.05174	0.0517512	0.0467972	0.0502978	0.0468108	0.0464749	0.0472356	0.0489149	0.0435423
Ploid5_4_Percent	0.0667162	0.0648437	0.0696789	0.0658443	0.070162	0.0718263	0.0692066	0.0666823	0.0680691	0.0694841	0.0665488	0.0646585	0.069194	0.0653597	0.0698423	0.0712375	0.0685268	0.0661335	0.0688381	0.0696239	0.0661446	0.0635068	0.0688527	0.0642278	0.0694063	0.0709121	0.0684422	0.0659323	0.069066	0.0705109	0.0569318	0.0538256	0.0595025	0.0548801	0.0600729	0.0613867	0.0594113	0.0562349	0.0638164	0.0648177	0.0612035	0.0583601	0.0634643	0.059577	0.0641861	0.0655438	0.0633361	0.0607293	0.0642239
Ploid6_2_Percent	0.0292394	0.0319584	0.0292505	0.0305756	0.0288707	0.028033	0.0293917	0.0301338	0.0298519	0.0295975	0.0304203	0.0337393	0.030599	0.0324817	0.0306163	0.0299808	0.0306177	0.0318476	0.031202	0.0306922	0.0388995	0.0422569	0.0381996	0.0408298	0.0384989	0.0371408	0.0385509	0.0398701	0.038486	0.0379562	0.0576216	0.0644788	0.0584605	0.062405	0.0580183	0.0563571	0.0586061	0.0613883	0.0553648	0.0545669	0.0347388	0.0405558	0.0364281	0.0382829	0.0359907	0.0349101	0.0362643	0.0377935	0.0363003
Ploid6_3_Percent	0.0307532	0.0312793	0.0257743	0.0277775	0.0249754	0.0249747	0.0254979	0.0268905	0.0250818	0.0249227	0.0322565	0.0328053	0.027667	0.0291927	0.0271754	0.0269782	0.0275551	0.0292384	0.027022	0.0261724	0.0418026	0.0418355	0.0353088	0.0375878	0.0342764	0.0342673	0.0349311	0.037061	0.0338625	0.0331038	0.0654689	0.0651173	0.0558599	0.0602256	0.0546699	0.0549804	0.056265	0.0587353	0.0516122	0.0509132	0.0366791	0.0387513	0.0328101	0.0349243	0.0318769	0.0317367	0.0322276	0.0342847	0.0311385
Ploid6_4_Percent	0.0438725	0.0387434	0.0421067	0.0417894	0.0418503	0.0425653	0.0416511	0.041353	0.0404487	0.0410443	0.0461847	0.0400937	0.0437035	0.0437972	0.0435158	0.0439688	0.0431296	0.0426863	0.0421635	0.0431122	0.0554265	0.0470323	0.052185	0.0520267	0.0521745	0.0529989	0.0514522	0.0517034	0.0506511	0.0514295	0.0786545	0.063219	0.0725018	0.0716402	0.0717453	0.0732112	0.0716278	0.070893	0.0730172	0.0742926	0.0543442	0.0462949	0.0513202	0.0508711	0.0514869	0.0524246	0.0512559	0.0499752	0.050471
Ploid2_2_MeanLength	591.215	578.966	636.17	611.824	614.518	635.603	589.335	650.387	643.742	638.377	590.136	622.343	668.379	617.154	644.953	639.738	648.607	669.064	677.618	647.052	671.766	677.491	752.13	722.49	729.284	764.583	711.34	722.845	765.235	761.737	723.004	752.334	828.768	779.423	803.393	833.079	780.73	787.726	889.916	851.474	545.229	483.309	580.958	580.907	569.061	575.966	616.984	586.486	576.111
Ploid2_3_MeanLength	452.588	484.674	510.563	503.317	510.529	527.157	514.852	506.451	504.803	506.742	464.682	487.2	534.94	519.189	534.496	561.535	528.431	517.686	518.715	545.673	509.699	522.899	582.992	584.475	625.154	623.522	561.422	570.378	573.698	613.413	553.184	583.165	623.883	635.019	682.632	644.026	632.065	621.638	647.9	653.412	443.812	422.773	486.36	464.457	457.763	463.122	500.936	470.24	468.521
Ploid2_4_MeanLength	622.271	716.334	662.241	662.501	702.601	674.3	691.723	640.682	674.264	647.828	637.531	731.502	692.055	672.476	733.418	713.149	689.743	672.139	662.496	658.045	744.09	813.848	780.794	777.483	785.575	798.663	791.757	767.055	805.239	794.52	844.153	939.505	914.919	921.151	949.742	970.028	960.534	905.843	972.943	953.417	593.899	620.876	626.201	605.309	597.632	659.559	614.818	617.037	600.406
Ploid3_2_MeanLength	411.914	456.331	465.714	456.916	460.658	460.815	458.283	464.16	471.451	479.653	439.095	468.423	486.5	457.845	477.419	485.775	476.165	482.571	501.749	493.129	482.764	509.584	534.438	503.596	524.151	518.595	512.74	526.543	550.68	533.226	511.173	510.541	561.407	513.71	542.292	541.797	542.043	524.845	568.113	576.423	352.741	358.74	375.045	369.804	374.959	372.163	372.339	371.678	381.64
Ploid3_3_MeanLength	359.637	410.488	398.322	394.987	420.07	423.51	411.79	400.651	422.207	423.862	367.667	430.049	421.378	410.713	428.472	438.292	422.824	408.322	437.011	432.292	392.241	451.899	444.745	430.121	462.595	473.752	454.458	444.522	462.802	463.91	412.686	447.288	454.725	447.54	470.121	472.337	471.41	445.754	473.093	474.259	309.718	332.719	327.095	331.244	339.379	345.944	341.58	328.601	352.404
Ploid3_4_MeanLength	403.474	524.33	467.479	448.294	480.109	479.487	480.098	451.659	470.182	463.454	430.59	550.579	487.806	475.616	495.132	502.861	493.572	471.668	489.102	491.365	474.467	601.927	531.369	522.709	558.832	548.403	537.461	516.939	545.275	536.218	540.678	626.695	567.186	561.57	595.643	588.391	577.643	562.024	570.195	563.779	355.93	412.69	387.117	377.567	390.756	392.735	385.483	367.765	398.005
Ploid4_2_MeanLength	343.527	361.765	360.199	349.137	363.399	366.836	363.733	363.616	381.396	374.134	339.555	368.037	372.698	353.944	373.956	365.369	369.211	369.261	385.784	382.912	383.485	407.477	412.946	399.376	412.839	405.443	404.92	413.637	434.28	433.151	390.8	394.909	416.654	394.907	408.331	410.413	399.379	399.745	463.843	477.139	299.452	284.838	295.854	295.848	299.349	285.844	296.981	296.255	310.328
Ploid4_3_MeanLength	302.373	327.788	336.097	315.83	334.856	337.173	331.559	326.995	349.749	347.62	295.394	331.794	337.481	319.735	349.381	351.224	344.209	328.612	356.543	354.414	324.978	362.197	368.102	355.246	379.67	372.911	369.142	356.261	389.105	381.976	326.269	340.972	352.008	343.023	374.044	366.246	359.884	353.038	379.431	373.749	255.284	261.413	263.858	263.077	272.474	267.709	267.572	263.892	289.244
Ploid4_4_MeanLength	333.593	414.301	379.557	363.673	384.749	386.396	382.874	368.362	392.601	390.166	341.53	427.668	388.4	367.981	394.381	398.872	391.962	379.154	400.2	395.047	372.849	471.495	424.332	401.649	433.005	432.767	424.608	408.998	445.812	435.424	412.937	466.631	425.862	432.801	435.409	434.433	441.599	427.156	443.634	432.8	286.521	322.068	309.26	292.609	310.414	313.389	310.926	299.201	312.329
Ploid5_2_MeanLength	285.317	308.199	314.108	304.935	316.818	322.7	319.82	308.959	328.249	336.123	300.799	313.737	320.125	306.522	326.744	318.377	322.364	313.245	343.623	349.39	343.896	365.67	362.107	354.547	366.192	373.616	367.759	364.038	393.18	394.914	404.218	382.097	419.165	388.343	417.03	407.537	421.363	409.72	494.053	490.104	261.211	260.739	268.792	259.981	266.89	272.185	265.102	276.956	290.813
Ploid5_3_MeanLength	264.235	282.151	286.07	276.083	295.78	307.783	295.447	293.068	310.254	316.02	277.73	285.37	301.919	286.939	303.142	307.763	301.6	295.082	320.738	316.747	302.285	321.491	342.084	317.666	343.121	339.94	328.603	332.865	359.23	368.044	342.576	318.811	354.697	344.709	359.797	359.841	348.309	346.39	399.542	393.108	232.445	231.212	241.64	236.259	244.864	254.908	242.796	248.513	263.079
Ploid5_4_MeanLength	304.94	349.113	333.634	320.292	342.458	338.351	337.983	328.678	354.703	354.447	314.353	363.155	341.874	326.162	348.109	346.033	342.149	335.829	360.205	356.577	346.886	421.023	393.668	374.15	398.545	406.365	396.022	380.34	415.534	404.294	404.979	443.564	436.362	441.205	439.25	443.141	432.675	435.937	447.181	452.059	278.073	291.535	280.714	279.54	288.59	287.828	284.194	278.438	294.914
Ploid6_2_MeanLength	534.186	518.02	573.355	545.186	566.997	586.734	568.174	573.947	615.585	592.317	541.497	551.946	573.123	580.313	603.916	598.693	595.177	593.875	647.258	673.317	596.297	621.979	666.504	644.79	681.689	679.442	695.934	663.284	770.973	740.077	643.833	664.028	723.313	680.293	736.758	755.87	742.595	715.484	818.843	845.011	468.397	416.924	463.594	436.871	467.912	471.753	475.717	477.888	524.35
Ploid6_3_MeanLength	447.308	436.014	504.77	510.33	513.81	550	518.711	510.157	586.928	569.271	469.554	455.843	517.59	510.547	560.189	584.89	539.253	511.01	599.337	613.041	495.76	504.142	592.336	525.478	614.954	635.249	591.258	567.885	680.504	689.368	500.97	520.497	602.486	556.88	641.976	662.297	618.856	577.328	704.085	732.943	393.712	338.469	417.292	392.728	410.12	434.436	419.621	402.796	460.074
Ploid6_4_MeanLength	589.539	672.114	655.789	631.281	679.791	658.994	674.153	648.287	704.675	697.353	616.687	716.28	694.434	660.844	714.946	699.194	708.271	673.984	726.32	734.404	661.262	811.197	791.885	739.495	798.798	794.292	788.593	763.061	822.762	826.941	672.821	875.449	840.284	774.588	858.197	873.97	847.605	797.924	886.712	887.733	477.669	506.586	517.59	497.452	521.593	523.229	518.243	504.247	542.89
Ploid2_2_GenomeCoverage	0.0546476	0.0593523	0.0597572	0.0587622	0.055674	0.0566376	0.0555969	0.0623445	0.052521	0.052912	0.0536664	0.0619467	0.0609969	0.0580093	0.0571677	0.0549332	0.0588668	0.0629877	0.0537769	0.0516858	0.0594666	0.0649354	0.0662158	0.0663879	0.061364	0.0646459	0.062405	0.0650197	0.0582211	0.0596223	0.0787558	0.0838154	0.0864278	0.0843546	0.0807784	0.0821971	0.0812189	0.0835289	0.083237	0.0810118	0.0645439	0.0641649	0.0700824	0.072567	0.06684	0.0662754	0.0744258	0.0726939	0.0604456
Ploid2_3_GenomeCoverage	0.0427954	0.0423347	0.0414833	0.0411851	0.0404376	0.0428304	0.0422384	0.0419719	0.0419686	0.0421711	0.0431901	0.0415266	0.0426615	0.0412839	0.0406762	0.0442655	0.0419927	0.0418299	0.0420811	0.0445081	0.0463198	0.0425518	0.044552	0.0448534	0.0457697	0.047304	0.0432241	0.0446051	0.0439993	0.0476442	0.0589945	0.0555229	0.056323	0.0582332	0.0585519	0.0570869	0.0565557	0.0562524	0.0563319	0.059509	0.0493676	0.0456238	0.0480209	0.0467274	0.0445913	0.0460127	0.0499266	0.0473749	0.0474339
Ploid2_4_GenomeCoverage	0.047109	0.0494847	0.0504234	0.0460672	0.0526506	0.0518119	0.0527305	0.0451674	0.0552702	0.0567762	0.0465596	0.0487178	0.0511282	0.0454202	0.0535292	0.0534563	0.0512267	0.0462657	0.0520351	0.0560278	0.0525948	0.0511579	0.0540498	0.0504787	0.0546825	0.0562928	0.0559386	0.0496832	0.0595488	0.0634483	0.0706001	0.0690586	0.0735912	0.0706904	0.0762617	0.0781779	0.0780765	0.0690103	0.0776842	0.083462	0.0530553	0.0563872	0.0608163	0.0528886	0.0574774	0.0649505	0.0593268	0.05441	0.0598688
Ploid3_2_GenomeCoverage	0.0534807	0.0694935	0.0644373	0.0668411	0.0622668	0.0599296	0.0628388	0.0662911	0.0534032	0.055516	0.0540905	0.0671543	0.0633597	0.0631216	0.0604148	0.0598502	0.061842	0.0652889	0.0530538	0.0540185	0.0569711	0.0688671	0.0655487	0.065543	0.0625346	0.0597605	0.0624804	0.0668617	0.0548171	0.0543464	0.0744875	0.0848595	0.0843376	0.0814408	0.079505	0.0769385	0.0811716	0.0814028	0.0707542	0.0736644	0.0691133	0.0842319	0.0790454	0.081543	0.0768782	0.0741429	0.0784433	0.080782	0.0665497
Ploid3_3_GenomeCoverage	0.0540636	0.058453	0.0520467	0.052262	0.0533289	0.055776	0.0544083	0.0537929	0.0527069	0.0528334	0.0523538	0.0575019	0.0516892	0.0514394	0.0512031	0.0540818	0.0527894	0.0520478	0.0515794	0.0510131	0.0531536	0.0566725	0.0514547	0.0507975	0.0518402	0.0549997	0.0534034	0.0527071	0.0523292	0.0524524	0.0669039	0.0674099	0.06247	0.0622772	0.0636639	0.0660095	0.0653368	0.0626409	0.0669173	0.0673264	0.067029	0.0700798	0.0621755	0.0634298	0.063196	0.0666487	0.0660586	0.0637678	0.0655307
Ploid3_4_GenomeCoverage	0.0494306	0.0618921	0.0587527	0.051339	0.0599506	0.0620081	0.0613998	0.0530532	0.0623232	0.0657626	0.049221	0.0606981	0.0575232	0.0508171	0.0578505	0.0606064	0.0584383	0.0515077	0.0607776	0.0650942	0.0498778	0.0593178	0.0567547	0.0511028	0.0594445	0.0600616	0.0579094	0.0511788	0.0619598	0.0650295	0.0620535	0.0713461	0.0696748	0.0617989	0.0720623	0.0730537	0.0712805	0.0632322	0.0712142	0.0765407	0.0597199	0.0753702	0.0731271	0.063843	0.0738514	0.0763796	0.0732593	0.0639803	0.0773277
Ploid4_2_GenomeCoverage	0.0449415	0.0590765	0.0518393	0.0528778	0.0510053	0.0496897	0.0521645	0.0539736	0.0466431	0.0468357	0.0438528	0.0596441	0.0531614	0.0534592	0.052227	0.0491365	0.0529643	0.0549201	0.0465497	0.0470258	0.0469627	0.0617249	0.0556971	0.0564834	0.0534678	0.0509317	0.0537283	0.0574022	0.0481769	0.0490889	0.0539882	0.0693855	0.0639135	0.0635361	0.06129	0.0594095	0.0613535	0.0633082	0.0573104	0.0606252	0.0510984	0.0632105	0.0575692	0.0595519	0.0568032	0.0525113	0.0573717	0.0588959	0.0510949
Ploid4_3_GenomeCoverage	0.0453975	0.0503049	0.0455533	0.0452816	0.0438969	0.045192	0.0452257	0.0459876	0.0409144	0.0407474	0.0444435	0.0509682	0.0456235	0.0457015	0.045379	0.0465469	0.0469306	0.0458102	0.0416595	0.0415476	0.0465618	0.0523965	0.047038	0.0473903	0.0467563	0.0470779	0.0476232	0.0470868	0.0434785	0.0425598	0.0545536	0.0567836	0.0520458	0.0517942	0.0535934	0.0539411	0.0536382	0.0532535	0.0517385	0.0509309	0.0503278	0.0536545	0.0477221	0.0491898	0.0480608	0.0480441	0.0487844	0.0492997	0.046271
Ploid4_4_GenomeCoverage	0.0514364	0.063349	0.0600694	0.0533445	0.0600737	0.0622936	0.0608129	0.0549594	0.0609611	0.0636541	0.051747	0.0639134	0.0602312	0.0528905	0.0603277	0.063127	0.060549	0.0554801	0.0613053	0.0636509	0.051726	0.0630031	0.0594774	0.0524651	0.0602286	0.0619395	0.0600747	0.0540727	0.0629359	0.06488	0.0590358	0.0678187	0.0644267	0.0598491	0.0654963	0.0671376	0.0668937	0.0605543	0.0693211	0.0711883	0.055624	0.0672599	0.0653696	0.0564047	0.0651573	0.0676587	0.0656971	0.0591598	0.0656148
Ploid5_2_GenomeCoverage	0.0218589	0.0298633	0.0260383	0.0267601	0.0258673	0.0254584	0.0264871	0.0264436	0.025122	0.0261891	0.0224892	0.0293597	0.0261668	0.0260541	0.0260025	0.0247606	0.0264315	0.0262007	0.0255037	0.0266702	0.0254664	0.0340219	0.0292029	0.0304587	0.0290042	0.0284088	0.0298457	0.0305695	0.0283904	0.0290114	0.0341899	0.0424765	0.0399319	0.0388332	0.0388846	0.036615	0.0400889	0.0400098	0.0399701	0.0401239	0.0252493	0.0333017	0.0295987	0.0295725	0.0285302	0.0284192	0.0290365	0.0310873	0.0291117
Ploid5_3_GenomeCoverage	0.0217067	0.0250579	0.0213039	0.0222789	0.0214894	0.0219804	0.0218222	0.0227313	0.0197114	0.0198865	0.0222914	0.0250425	0.0219173	0.0225774	0.0214362	0.0217042	0.0220521	0.0224075	0.0197697	0.0192716	0.0249973	0.0282578	0.0252243	0.025567	0.0248008	0.0242703	0.0243698	0.0255467	0.0222996	0.0229905	0.0339472	0.0337267	0.0322087	0.0326576	0.0311561	0.0318819	0.0315785	0.0324266	0.0310336	0.0303811	0.0246076	0.0269793	0.0235691	0.0246458	0.0234448	0.0243856	0.0239486	0.0252175	0.0221209
Ploid5_4_GenomeCoverage	0.0308883	0.0360565	0.034629	0.0316207	0.0349584	0.0355891	0.0349092	0.0326863	0.0332482	0.0348778	0.0310263	0.0364143	0.0343331	0.0311706	0.03442	0.0351474	0.0340891	0.0323683	0.0332375	0.0342303	0.0336507	0.0401676	0.0382303	0.0343581	0.038041	0.0398993	0.0383399	0.0355354	0.037337	0.0382124	0.0421054	0.0448568	0.0456146	0.0428676	0.0451698	0.0468557	0.045218	0.0430892	0.0462657	0.049116	0.0348222	0.0383625	0.0371319	0.0345405	0.0378876	0.0388327	0.0375867	0.0350783	0.0365761
Ploid6_2_GenomeCoverage	0.0237143	0.0263682	0.0249819	0.0249935	0.0238167	0.0240866	0.0249232	0.0257935	0.0253054	0.0248268	0.0244305	0.0288793	0.0254527	0.0275615	0.0261761	0.0255926	0.0264947	0.0275646	0.0270713	0.0284936	0.0340189	0.0394842	0.0359102	0.0376405	0.036092	0.0349408	0.0379499	0.0374746	0.0386022	0.037654	0.0677499	0.0804426	0.0742865	0.0751604	0.0731725	0.073374	0.0765553	0.0772012	0.0734983	0.0772906	0.0332929	0.0381249	0.0351988	0.0346868	0.0344453	0.0338999	0.0360244	0.0374676	0.0367568
Ploid6_3_GenomeCoverage	0.0208855	0.0217224	0.0193798	0.0212546	0.0186705	0.0201154	0.0197391	0.0204591	0.020272	0.0200921	0.0224633	0.0231906	0.0207839	0.0217928	0.021552	0.0224985	0.021604	0.0217752	0.0217089	0.0221224	0.0303939	0.0316846	0.029499	0.0282398	0.0289877	0.0301407	0.0292144	0.0298241	0.0299791	0.03059	0.0598958	0.0636791	0.0591246	0.0593767	0.0600793	0.0627201	0.0612504	0.0596019	0.0589143	0.0625511	0.0295474	0.0295736	0.0285366	0.0284462	0.02674	0.0283804	0.0282393	0.0286482	0.027665
Ploid6_4_GenomeCoverage	0.0392694	0.0414755	0.0411324	0.0395545	0.041392	0.0410774	0.0419066	0.0399815	0.0392507	0.0405338	0.042241	0.044536	0.044048	0.0423202	0.044045	0.0438338	0.0444135	0.0419294	0.0410502	0.0436551	0.0537532	0.0573155	0.058286	0.0550075	0.0573154	0.0582876	0.0573938	0.0559073	0.0542165	0.0570083	0.0966436	0.103983	0.107028	0.0982428	0.1054	0.11021	0.106796	0.0994269	0.104966	0.110551	0.0531132	0.0528792	0.055364	0.0524841	0.0549293	0.0564624	0.0554684	0.0522769	0.0529127
Note: The genome coverage is not accurate because duplicated blocks are not removed
[truncated: 1 more columns]

## Sheet: Table 5
Supplementary Table 5 Summary of final syntenic haplotype blocks used for HPA between sweet potato and Ipomoea batatas 4x
Accession	CIP403270	PI518474	PI561246	PI561247	PI561248	PI561255	PI561258	PI561261	CIP695141	CIP695150	CIP403270	PI518474	PI561246	PI561247	PI561248	PI561255	PI561258	PI561261	CIP695141	CIP695150	CIP403270	PI518474	PI561246	PI561247	PI561248	PI561255	PI561258	PI561261	CIP695141	CIP695150	CIP403270	PI518474	PI561246	PI561247	PI561248	PI561255	PI561258	PI561261	CIP695141	CIP695150	CIP403270	PI518474	PI561246	PI561247	PI561248	PI561255	PI561258	PI561261	CIP695141
Reference	Huarmeyano	Huarmeyano	Huarmeyano	Huarmeyano	Huarmeyano	Huarmeyano	Huarmeyano	Huarmeyano	Huarmeyano	Huarmeyano	NASPOT5/58	NASPOT5/58	NASPOT5/58	NASPOT5/58	NASPOT5/58	NASPOT5/58	NASPOT5/58	NASPOT5/58	NASPOT5/58	NASPOT5/58	NK259L	NK259L	NK259L	NK259L	NK259L	NK259L	NK259L	NK259L	NK259L	NK259L	Y601	Y601	Y601	Y601	Y601	Y601	Y601	Y601	Y601	Y601	Yuzi7	Yuzi7	Yuzi7	Yuzi7	Yuzi7	Yuzi7	Yuzi7	Yuzi7	Yuzi7
MeanLength	319.775	388.769	367.585	351.164	377.288	377.231	371.712	359.354	378.694	375.756	326.173	400.063	375.567	357.01	385.554	385.392	379.502	366.886	386.611	385.213	345.616	433.213	406.554	383.393	417.652	417.889	410.73	395.864	421.243	418.469	344.984	419.182	399.87	379.677	410.217	411.429	403.412	389.9	418.029	415.397	266.913	300.58	291.077	281.479	296.062	295.796	293.122	286.228	298.933
GenomeCoverage	0.33972	0.38168	0.368504	0.354681	0.370218	0.373794	0.37169	0.360304	0.359303	0.365188	0.338022	0.379909	0.365988	0.351384	0.367586	0.371709	0.36909	0.358691	0.356568	0.363654	0.347548	0.389266	0.37665	0.362736	0.378242	0.381928	0.37999	0.369322	0.367452	0.374137	0.386913	0.427364	0.416472	0.401533	0.41707	0.422559	0.42018	0.408041	0.405639	0.413237	0.367768	0.41433	0.399954	0.38436	0.401504	0.404515	0.403235	0.390776	0.389755
BlockNumber	495058	457497	467159	470660	457262	461748	465966	467225	442132	452888	482922	442518	454108	458650	444277	449448	453208	455584	429781	439913	468598	418721	431717	440886	422022	425893	431117	434749	406488	416627	522630	475089	485341	492818	473778	478599	485362	487675	452182	463570	642073	642341	640296	636314	631956	637268	641048	636203	607571
Ploid2_2_Number	21861	18125	19754	20651	18830	18592	19686	20497	17886	18170	21181	17281	18790	20011	18259	18052	18805	19617	17229	17555	19674	16167	17578	18800	16746	16786	17297	18038	15984	16308	19747	15888	17096	18295	16703	16414	17029	17678	16523	16453	26160	23252	24202	25707	23632	23273	24073	25107	22174
Ploid2_3_Number	25756	21091	21549	21609	20997	21297	21547	21898	22580	22322	25011	20164	20790	20980	19960	20494	20600	21170	21693	21620	23115	18393	18833	19149	18113	18755	18741	19459	19485	19458	20459	16690	17334	17726	16582	17098	17340	17347	16446	17053	27624	25176	24690	25346	24564	24905	24865	25322	25393
Ploid2_4_Number	21390	22364	23228	20739	23004	23537	23195	21158	24501	26097	20476	21165	22248	19886	22233	22729	22295	20667	23179	24840	18227	18730	19587	18041	19992	20200	20005	18269	20645	22023	15998	17626	18085	16690	18101	18412	18345	16890	16846	17902	23586	29325	29206	25538	29258	29770	29274	26328	28962
Ploid3_2_Number	35228	29155	32902	35858	31948	30886	32135	34296	28326	29194	33364	27549	30860	34024	30109	29434	30556	32731	26692	27812	31295	25735	28879	31547	27780	27109	28394	30248	24332	25230	34604	29085	31788	34540	30718	30221	31464	33179	27319	27940	50917	45242	48740	52708	47438	46208	48299	50767	42755
Ploid3_3_Number	49300	39699	40953	42495	39694	40632	41086	42482	39304	38968	46599	37042	38355	39891	37130	38196	38709	40080	37100	36787	43354	34035	35522	36834	34308	34947	35559	36724	34653	34521	44319	35769	36607	37430	36223	36920	36563	37784	37751	37475	67934	58005	57988	59189	56788	57906	58378	59426	56935
Ploid3_4_Number	42778	45307	45834	41217	45856	47338	46603	42679	47834	50630	39658	41878	42667	38179	42680	43671	43047	39449	44438	46821	35051	36182	37143	33776	37327	38410	37846	34549	39214	41225	30972	36148	36667	32054	36534	37580	37187	33202	36086	38494	55893	69730	67900	60121	68547	70219	68743	62570	68776
Ploid4_2_Number	37200	32401	35116	38191	34501	33585	34918	36669	33148	34137	37024	32259	35571	38549	34519	33878	35346	37166	32990	33472	34715	29562	32821	35788	31483	30899	32087	34422	29240	30009	35782	32341	34725	37837	33554	33035	34599	36618	29491	30206	46282	43795	46517	49558	45593	44717	46177	48058	43067
Ploid4_3_Number	52791	45034	45064	48680	43643	44272	44912	47236	39300	38945	53143	45007	45265	48830	43505	43910	44966	47045	39241	39162	49748	41583	42257	45061	40431	41015	41877	43788	36805	36414	53350	44584	44670	46801	43338	43987	44970	46368	41135	40773	67080	59515	58897	61903	57404	57918	59000	61278	52550
Ploid4_4_Number	60019	63043	63137	58084	62614	64425	63468	59719	61543	64094	59153	61339	61709	56809	61068	63231	61761	58398	60661	63280	52904	53570	54446	50607	54237	55708	55152	51572	54451	56831	47907	52746	52513	47521	52638	53949	52836	49236	53802	56167	73265	84441	82440	74506	82383	84487	82797	77399	81794
Ploid5_2_Number	22397	20005	21370	22758	21262	21011	21570	22187	21893	22538	21950	19068	21035	22090	20717	20594	21028	21718	21320	21919	21631	19052	20633	22294	20195	19904	20651	21513	20287	20689	22763	21235	22625	24341	22284	21691	22480	23548	20656	21116	27172	26264	27738	28723	27254	27271	27668	28500	28011
Ploid5_3_Number	29727	27114	25891	28368	25224	24545	25295	27038	22499	21931	28908	26527	25237	27661	24494	24285	25091	26303	21775	21266	29649	26427	25253	28148	24743	24316	25259	26626	21540	21496	33195	29823	29055	30812	27645	28098	28542	30130	24881	24438	37526	35438	33474	36205	32828	32439	33670	34781	29137
Ploid5_4_Number	41478	43985	43346	40988	42622	43871	43156	41606	38881	40453	40262	42452	41631	39501	41245	42244	41626	40214	38130	39217	39128	39709	39611	37500	39127	40071	39570	38345	36477	37985	37802	38706	38878	35901	38428	39541	39131	36800	38406	39702	50052	55107	54142	50187	53873	55321	54266	51592	50603
Ploid6_2_Number	12285	10051	10616	11424	10174	10349	10722	11147	10800	11004	12370	10153	10935	11808	10714	10808	11019	11485	10899	11116	16368	12381	13330	14959	13203	12948	13471	14212	13091	13450	30227	23578	25333	28592	24394	23924	25431	27212	22803	23774	18993	18187	18404	19521	18157	17948	18553	19185	18486
Ploid6_3_Number	15969	14631	12682	13860	11952	11931	12341	13287	11266	11292	16324	14927	13198	14293	12549	12476	12940	14065	11757	11523	21278	18261	16274	18243	15497	15328	15962	17358	14185	14096	40636	34610	31418	35502	29644	29577	31324	33617	25915	26194	25127	25721	22467	24209	21391	21158	21865	23464	19749
Ploid6_4_Number	26879	25492	25717	25738	24941	25477	25332	25326	22371	23113	27499	25707	25817	26138	25095	25446	25419	25476	22677	23523	32461	28934	29550	30139	28840	29497	29246	29626	26099	26892	54869	46260	48547	48776	46992	48152	48121	48066	44122	45883	44462	43143	43491	42893	42846	43728	43420	42426	39179
Ploid2_2_Percent	0.0441585	0.0396177	0.0422854	0.0438767	0.0411799	0.0402644	0.0422477	0.0438697	0.040454	0.0401203	0.0438601	0.0390515	0.0413778	0.0436302	0.0410982	0.0401648	0.0414931	0.043059	0.0400879	0.0399056	0.0419848	0.0386104	0.0407165	0.0426414	0.0396804	0.0394137	0.0401214	0.0414906	0.0393222	0.0391429	0.0377839	0.0334422	0.0352247	0.0371232	0.0352549	0.0342959	0.0350852	0.0362496	0.0365406	0.0354919	0.040743	0.0361988	0.0377981	0.0403999	0.037395	0.03652	0.0375526	0.0394638	0.0364961
Ploid2_3_Percent	0.0520262	0.0461008	0.0461278	0.0459121	0.045919	0.0461226	0.0462416	0.0468682	0.0510707	0.0492881	0.051791	0.0455665	0.0457821	0.0457429	0.0449269	0.0455982	0.0454537	0.0464678	0.0504745	0.0491461	0.049328	0.0439266	0.0436235	0.043433	0.0429196	0.0440369	0.0434708	0.0447592	0.047935	0.0467036	0.0391462	0.0351303	0.0357151	0.0359687	0.0349995	0.0357251	0.0357259	0.0355708	0.0363703	0.0367862	0.0430231	0.0391941	0.0385603	0.0398325	0.0388698	0.0390809	0.038788	0.0398018	0.0417943
Ploid2_4_Percent	0.0432071	0.0488834	0.0497218	0.0440637	0.0503081	0.0509737	0.0497783	0.0452844	0.0554156	0.0576235	0.0424002	0.0478286	0.0489928	0.0433577	0.0500431	0.0505709	0.0491937	0.0453638	0.0539321	0.0564657	0.0388969	0.0447315	0.04537	0.0409199	0.0473719	0.0474298	0.0464027	0.0420219	0.0507887	0.0528602	0.0306106	0.0371004	0.0372625	0.0338665	0.0382057	0.0384706	0.0377965	0.0346337	0.0372549	0.0386177	0.0367341	0.0456533	0.0456133	0.0401343	0.0462975	0.046715	0.0456658	0.041383	0.0476685
Ploid3_2_Percent	0.0711593	0.0637272	0.07043	0.0761866	0.069868	0.0668893	0.0689643	0.0734036	0.0640668	0.0644619	0.0690878	0.0622551	0.0679574	0.0741829	0.0677708	0.0654892	0.0674216	0.0718441	0.062106	0.0632216	0.0667843	0.061461	0.0668934	0.0715536	0.065826	0.0636521	0.0658615	0.0695758	0.0598591	0.0605578	0.0662113	0.0612201	0.0654962	0.0700867	0.0648363	0.0631447	0.0648258	0.0680351	0.0604159	0.0602714	0.079301	0.070433	0.076121	0.0828333	0.0750654	0.0725095	0.0753438	0.0797969	0.0703704
Ploid3_3_Percent	0.0995843	0.0867743	0.0876639	0.0902881	0.086808	0.087996	0.0881738	0.0909241	0.0888965	0.0860433	0.0964938	0.0837073	0.0844623	0.0869748	0.083574	0.0849842	0.0854111	0.087975	0.086323	0.0836234	0.0925185	0.0812832	0.0822808	0.0835454	0.0812943	0.0820558	0.0824811	0.0844717	0.0852497	0.0828583	0.0848	0.0752891	0.0754253	0.075951	0.0764556	0.0771418	0.0753314	0.0774778	0.0834863	0.08084	0.105804	0.0903025	0.0905644	0.0930185	0.0898607	0.090866	0.0910665	0.0934073	0.0937092
Ploid3_4_Percent	0.0864101	0.0990323	0.0981122	0.0875728	0.100284	0.102519	0.100014	0.0913457	0.108189	0.111794	0.0821209	0.0946357	0.0939578	0.0832421	0.0960662	0.0971659	0.0949829	0.08659	0.103397	0.106432	0.0747997	0.0864108	0.0860355	0.0766094	0.088448	0.090187	0.0877859	0.0794688	0.0964703	0.0989494	0.0592618	0.0760868	0.0755489	0.0650423	0.0771121	0.0785208	0.076617	0.0680822	0.0798041	0.0830382	0.0870508	0.108556	0.106045	0.0944832	0.108468	0.110188	0.107235	0.0983491	0.113198
Ploid4_2_Percent	0.0751427	0.0708223	0.0751693	0.0811435	0.0754513	0.0727345	0.0749368	0.0784825	0.0749731	0.0753763	0.0766666	0.0728987	0.0783316	0.0840488	0.077697	0.0753769	0.0779907	0.0815788	0.07676	0.0760878	0.0740827	0.0706007	0.0760243	0.0811729	0.0746004	0.0725511	0.0744276	0.0791767	0.0719332	0.0720285	0.0684653	0.0680736	0.0715476	0.0767768	0.0708222	0.0690244	0.0712849	0.0750869	0.0652193	0.0651595	0.0720821	0.0681803	0.0726492	0.0778829	0.0721458	0.0701699	0.0720336	0.0755388	0.0708839
Ploid4_3_Percent	0.106636	0.0984356	0.0964639	0.103429	0.0954442	0.0958791	0.0963847	0.101099	0.0888875	0.0859926	0.110045	0.101707	0.0996789	0.106465	0.0979231	0.0976976	0.0992171	0.103263	0.0913046	0.0890221	0.106163	0.0993096	0.0978813	0.102206	0.0958031	0.0963035	0.097136	0.10072	0.0905439	0.0874019	0.10208	0.0938435	0.0920384	0.0949661	0.0914732	0.0919078	0.0926525	0.0950797	0.09097	0.0879544	0.104474	0.0926533	0.091984	0.0972837	0.0908354	0.0908848	0.0920368	0.0963183	0.0864919
Ploid4_4_Percent	0.121236	0.1378	0.135151	0.12341	0.136932	0.139524	0.136207	0.127816	0.139196	0.141523	0.12249	0.138614	0.135891	0.123861	0.137455	0.140686	0.136275	0.128183	0.141144	0.143847	0.112898	0.127937	0.126115	0.114785	0.128517	0.130803	0.127928	0.118625	0.133955	0.136407	0.0916652	0.111023	0.108198	0.0964271	0.111103	0.112723	0.108859	0.100961	0.118983	0.121162	0.114107	0.131458	0.128753	0.11709	0.130362	0.132577	0.129159	0.121658	0.134625
Ploid5_2_Percent	0.0452412	0.0437271	0.0457446	0.0483534	0.0464985	0.0455032	0.0462909	0.0474868	0.0495169	0.0497651	0.0454525	0.0430898	0.0463216	0.0481631	0.0466308	0.0458207	0.0463981	0.0476707	0.0496067	0.0498258	0.0461611	0.0455005	0.0477929	0.0505664	0.047853	0.0467347	0.0479011	0.0494837	0.049908	0.0496583	0.0435547	0.0446969	0.0466167	0.0493915	0.0470347	0.0453219	0.0463159	0.0482863	0.0456807	0.0455508	0.0423192	0.0408879	0.0433206	0.0451397	0.0431264	0.0427936	0.0431606	0.044797	0.0461033
Ploid5_3_Percent	0.0600475	0.059266	0.0554222	0.0602728	0.0551631	0.0531567	0.0542851	0.0578693	0.0508875	0.0484248	0.0598606	0.0599456	0.0555749	0.0603096	0.0551323	0.0540329	0.0553631	0.0577347	0.0506653	0.0483414	0.0632717	0.0631136	0.0584943	0.0638442	0.0586296	0.0570942	0.0585897	0.0612445	0.0529905	0.0515953	0.0635153	0.0627735	0.0598651	0.0625221	0.0583501	0.0587089	0.0588056	0.0617829	0.0550243	0.052717	0.0584451	0.0551701	0.0522789	0.056898	0.0519467	0.0509032	0.0525234	0.0546697	0.0479565
Ploid5_4_Percent	0.0837841	0.0961427	0.0927864	0.0870862	0.0932113	0.0950107	0.0926162	0.0890492	0.0879398	0.0893223	0.0833716	0.0959328	0.0916764	0.0861245	0.0928362	0.0939909	0.0918475	0.0882691	0.0887196	0.0891472	0.0835001	0.094834	0.0917522	0.085056	0.0927132	0.094087	0.0917848	0.0882003	0.089737	0.0911727	0.0723303	0.0814711	0.0801045	0.0728484	0.0811097	0.0826182	0.0806223	0.0754601	0.0849348	0.085644	0.0779538	0.0857909	0.0845578	0.0788714	0.085248	0.0868096	0.084652	0.0810936	0.0832874
Ploid6_2_Percent	0.0248153	0.0219695	0.0227246	0.0242723	0.0222498	0.0224127	0.0230103	0.0238579	0.0244271	0.0242974	0.0256149	0.0229437	0.0240802	0.0257451	0.0241156	0.0240473	0.0243133	0.0252094	0.0253594	0.0252686	0.0349297	0.0295686	0.0308767	0.0339294	0.0312851	0.030402	0.0312467	0.0326901	0.0322051	0.0322831	0.0578363	0.0496286	0.0521963	0.0580174	0.0514882	0.0499876	0.0523959	0.0557995	0.0504288	0.0512846	0.0295807	0.0283136	0.028743	0.0306783	0.0287314	0.028164	0.0289417	0.0301555	0.0304261
Ploid6_3_Percent	0.0322568	0.0319805	0.0271471	0.029448	0.0261382	0.0258388	0.0264848	0.0284381	0.0254811	0.0249333	0.0338026	0.033732	0.0290636	0.0311632	0.0282459	0.0277585	0.028552	0.0308725	0.0273558	0.0261938	0.0454078	0.0436114	0.037696	0.041378	0.0367208	0.0359903	0.0370248	0.0399265	0.0348965	0.0338336	0.0777529	0.0728495	0.0647339	0.0720388	0.0625694	0.0617991	0.0645374	0.0689332	0.057311	0.056505	0.0391342	0.0400426	0.0350885	0.0380457	0.0338489	0.0332011	0.0341082	0.0368813	0.0325048
Ploid6_4_Percent	0.0542946	0.0557206	0.0550498	0.0546849	0.0545442	0.0551751	0.0543645	0.0542051	0.050598	0.0510347	0.0569429	0.0580926	0.0568521	0.056989	0.056485	0.0566161	0.0560868	0.0559194	0.0527641	0.0534719	0.0692726	0.0691009	0.0684476	0.0683601	0.0683377	0.0692592	0.0678377	0.0681451	0.0642061	0.0645469	0.104986	0.0973712	0.100027	0.0989737	0.0991857	0.10061	0.0991446	0.0985615	0.0975758	0.0989775	0.0692476	0.0671653	0.0679233	0.0674085	0.067799	0.0686179	0.0677328	0.0666863	0.0644846
Ploid2_2_MeanLength	358.418	416.727	397.453	390.379	406.99	405.329	398.448	393.331	381.441	383.329	371.788	434.937	411.986	400.947	429.737	403.936	407.522	411.113	401.543	404.901	356.735	452.684	423.275	407.233	422.751	417.867	418.352	423.475	418.909	412.95	347.667	404.996	395.492	389.591	407.152	398.88	399.081	393.181	406.434	404.951	302.438	328.622	332.368	319.109	330.812	326.463	328.468	317.776	314.437
Ploid2_3_MeanLength	307.145	396.11	364.173	355.787	372.202	367.545	373.199	351.35	352.053	351.257	315.18	402.45	379.125	359.818	388.129	383.56	387.057	366.606	374.672	362.158	321.916	411.565	379.53	364.886	402.657	389.576	388.04	370.517	365.389	368.67	309.567	388.024	358.407	344.595	362.763	367.296	367.818	354.579	358.952	345.071	270.42	321.121	308.429	294.142	307.288	303.642	317.925	302.066	303.067
Ploid2_4_MeanLength	363.545	493.716	432.381	418.77	450.719	443.873	434.837	424.097	415.726	406.794	358.546	512.422	439.089	421.176	454.925	455.994	441.9	433.009	419.985	409.841	379.452	515.457	459.288	433.75	463.278	469.95	454.85	445.299	446.243	431.789	382.348	496.28	447.885	415.86	454.166	455.247	445.148	452.461	442.831	410.419	300.878	370.831	335.619	326.901	346.131	340.747	336.829	334.266	322.108
Ploid3_2_MeanLength	337.264	387.965	377.315	372.435	383.752	377.745	377.627	373.168	384.608	372.737	339.587	394.078	379.204	374.115	388.628	389.384	382.458	377.01	383.368	384.329	348.779	411.04	399.668	393.069	410.144	402.149	400.056	394.102	406.539	404.573	330.14	370.937	368.166	358.061	376.723	361.907	368.807	360.923	370.844	371.955	270.839	296.205	292.176	289.622	296.8	290.057	293.688	290.012	295.672
Ploid3_3_MeanLength	310.997	383.377	355.94	342.035	366.892	368.127	360.852	347.547	364.43	362.96	315.166	388.183	363.182	346.514	368.851	375.007	364.355	350.927	369.774	363.009	320.084	399.468	370.514	350.241	379.094	387.285	378.191	364.432	383.722	373.39	305.998	363.537	342.056	331.212	348.308	353.218	345.884	337.891	349.626	348.464	261.722	299.128	287.494	278.855	291.03	294.145	288.408	281.735	292.915
Ploid3_4_MeanLength	337.477	454.5	395.755	373.609	405.399	408.22	402.22	387.74	400.121	394.073	343.635	471.676	401.081	378.55	409.005	413.202	406.613	391.393	404.174	401.303	357.436	494.319	418.735	401.31	433.676	433.625	425.671	411.803	422.457	419.366	340.723	451.625	386.965	375.394	404.096	400.699	392.977	378.995	390.366	383.17	276.489	337.821	307.331	296.618	313.34	313.339	310.053	302.16	308.243
Ploid4_2_MeanLength	288.141	324.712	319.901	308.036	321.479	325.418	321.745	316.248	337.187	336.565	292.059	327.991	324.904	313.051	333.13	330.488	324.322	320.248	344.14	344.756	305.914	353.113	341.065	333.181	356.203	351.098	344.388	340.516	367.408	366.742	282.416	305.908	304.272	294.746	306.584	305.396	300.151	297.415	330.92	332.575	230.58	245.194	244.425	239.067	250.029	246.523	245.381	241.179	258.249
Ploid4_3_MeanLength	268.503	312.692	307.842	292.336	315.424	315.92	308.922	298.938	320.964	315.314	272.329	320.461	312.094	294.305	321.152	319.98	316.672	302.584	326.345	322.09	285.439	336.665	331.607	312.667	340.174	337.986	336.571	319.78	341.717	337.57	260.308	293.698	288.56	278.797	293.9	295.606	291.223	281.076	301.155	300.679	220.513	239.694	235.846	231.32	243.425	243.064	239.895	234.16	247.687
Ploid4_4_MeanLength	300.245	379.807	346.345	329.532	353.591	354.553	347.965	338.971	357.277	355.147	305.661	391.561	351.479	331.794	358.793	361.124	355.475	347.032	363.341	361.912	326.007	427.305	376.679	354.086	384.6	385.861	378.55	367.516	387.741	385.598	303.572	368.33	332.289	321.856	339.45	341.609	338.332	331.264	339.368	336.592	245.922	282.097	264.422	253.789	264.692	267.132	263.2	258.724	267.355
Ploid5_2_MeanLength	255.275	287.509	287.004	272.409	295.663	296.1	293.91	279.44	308.89	307.797	257.217	291.685	286.398	272.874	296.29	296.184	294.277	281.607	311.6	311.415	279.456	319.586	319.189	300.33	327.546	330.088	325.207	309.401	351.924	350.999	259.223	284.467	287.229	277.148	290.754	297.239	290.688	279.046	312.189	317.269	210.795	222.815	224.857	217.644	228.089	231.952	228.26	221.58	241.51
Ploid5_3_MeanLength	244.404	271.643	275.302	263.362	281.618	288.297	277.975	270.091	295.664	291.85	245.96	274.449	279.208	266.199	285.371	289.748	279.833	271.05	292.869	293.418	264.671	299.878	304.692	290.423	314.951	314.744	308.968	296.928	329.147	327.684	244.773	267.073	270.789	258.697	278.371	278.472	272.491	268.886	292.789	292.906	203.153	214.765	218.268	211.285	222.153	225.176	218.727	216.996	234.541
Ploid5_4_MeanLength	281.835	331.798	314.798	302.077	320.713	321.817	316.598	309.766	328.373	327.808	283.602	333.571	315.14	300.18	320.432	321.05	317.063	310.31	327.835	325.855	311.297	384.841	358.01	334.046	362.77	367.157	358.054	349.037	370.008	366.813	296.882	352.683	331.115	320.614	331.084	334.064	328.012	323.518	331.627	335.784	234.682	258.064	246.229	240.869	251.036	250.073	248.163	244.505	254.487
Ploid6_2_MeanLength	382.143	448.623	460.489	411.171	487.194	490.729	469.097	438.905	488.453	492.008	386.326	460.349	465.515	431.757	499.994	489.944	482.597	460.429	508.416	514.543	399.266	507.465	506.231	450.906	534.199	537.412	524.083	475.441	570.479	569.424	401.331	498.969	502.287	447.579	529.351	528.478	507.222	479.432	571.532	563.324	314.841	336.859	344.572	322.151	356.706	360.181	353.052	342.967	379.365
Ploid6_3_MeanLength	359.619	401.862	440.125	417.169	459.559	457.884	459.419	432.204	490.909	480.588	367.859	424.067	448.715	415.26	480.103	481.464	457.264	434.009	502.244	504.88	383.869	456.643	476.097	435.044	508.525	512.927	495.782	462.853	545.211	531.548	364.653	453.095	461.202	424.6	487.47	494.637	473.14	447.433	535.096	522.67	301.075	305.353	332.048	313.016	346.54	349.12	342.473	333.339	372.092
Ploid6_4_MeanLength	562.189	672.442	641.528	617.319	671.701	655.904	655.34	634.65	686.201	683.794	598.122	721.265	690.807	658.845	702.282	698.956	704.639	667.594	718.715	725.777	628.941	813.813	778.439	719.921	786.175	783.381	781.752	748.393	807.916	815.87	632.615	861.543	808.008	749.212	834.39	838.773	818.184	773.436	855.682	849.714	444.233	502.465	492.035	479.488	499.883	497.922	493.658	482.182	517.214
Ploid2_2_GenomeCoverage	0.0168143	0.0162088	0.0168485	0.0173001	0.0164458	0.0161717	0.0168325	0.0173009	0.0146407	0.0149468	0.016899	0.0161293	0.0166123	0.0172177	0.0168384	0.015648	0.0164454	0.0173067	0.0148461	0.0152535	0.0150612	0.0157052	0.0159666	0.0164294	0.015192	0.0150524	0.0155286	0.0163922	0.014369	0.0144517	0.0147328	0.0138083	0.0145095	0.0152954	0.0145939	0.01405	0.0145838	0.0149158	0.0144112	0.0142978	0.0169783	0.0163975	0.017262	0.017604	0.0167765	0.0163045	0.0169685	0.0171213	0.0149623
Ploid2_3_GenomeCoverage	0.0169763	0.0179281	0.0168405	0.0164985	0.0167709	0.0167977	0.0172563	0.0165107	0.017059	0.0168259	0.0169165	0.0174144	0.0169144	0.0161998	0.0166248	0.0168686	0.0171105	0.0166549	0.0174418	0.0168025	0.0159682	0.0162447	0.0153386	0.0149942	0.0156511	0.0156794	0.0156059	0.0154721	0.0152783	0.0153942	0.0135913	0.0138975	0.013332	0.0131081	0.0129086	0.0134767	0.0136868	0.0131995	0.0126682	0.0126278	0.0160305	0.017349	0.0163417	0.0159988	0.0161981	0.0162282	0.0169642	0.0164142	0.0165148
Ploid2_4_GenomeCoverage	0.0166874	0.0236945	0.0215526	0.0186374	0.02225	0.0224197	0.0216442	0.0192558	0.021858	0.0227816	0.0157547	0.0232738	0.0209635	0.0179734	0.0217049	0.0222413	0.0211423	0.0192041	0.0208905	0.0218468	0.014842	0.0207181	0.0193052	0.0167927	0.0198755	0.0203715	0.0195266	0.0174577	0.01977	0.0204065	0.0131264	0.0187716	0.0173822	0.0148944	0.0176416	0.0179874	0.0175244	0.0163995	0.0160087	0.015767	0.0152288	0.0233364	0.0210349	0.0179153	0.0217323	0.0217686	0.0211598	0.0188856	0.0200194
Ploid3_2_GenomeCoverage	0.0254964	0.0242731	0.0266408	0.0286587	0.0263096	0.0250369	0.0260413	0.0274643	0.0233789	0.0233516	0.0243136	0.0232974	0.0251124	0.0273156	0.0251102	0.024595	0.0250785	0.0264809	0.0219593	0.022938	0.0234232	0.0227002	0.0247686	0.0266101	0.0244506	0.0233949	0.0243763	0.0255815	0.0212276	0.0219045	0.0245157	0.0231521	0.0251146	0.02654	0.0248334	0.0234707	0.024902	0.0256979	0.0217409	0.0223017	0.0295933	0.0287577	0.0305598	0.0327589	0.0302142	0.0287621	0.03044	0.031595	0.027128
Ploid3_3_GenomeCoverage	0.0329021	0.0326607	0.0312811	0.0311909	0.0312524	0.0320986	0.0318158	0.0316839	0.0307377	0.030352	0.0315164	0.0308568	0.0298928	0.0296631	0.0293898	0.0307382	0.0302662	0.0301831	0.0294395	0.0286571	0.0297792	0.0291762	0.0282438	0.0276845	0.0279101	0.0290443	0.028859	0.0287202	0.028535	0.0276609	0.0291024	0.0279046	0.0268708	0.0266039	0.027075	0.027985	0.0271389	0.0273971	0.0283239	0.0280233	0.0381547	0.0372343	0.0357757	0.0354193	0.0354663	0.0365515	0.0361307	0.0359284	0.0357884
Ploid3_4_GenomeCoverage	0.0309803	0.0441895	0.0389255	0.0330456	0.0398932	0.0414691	0.0402252	0.035512	0.0410722	0.0428159	0.0292448	0.0423887	0.0367235	0.0310148	0.0374605	0.0387236	0.0375616	0.0331337	0.0385428	0.0403212	0.0268856	0.0383814	0.0333762	0.0290877	0.0347383	0.035742	0.0345712	0.0305313	0.0355504	0.0371	0.022646	0.0350334	0.0304486	0.025822	0.0316812	0.0323144	0.0313602	0.0270034	0.0302295	0.0316522	0.0331631	0.0505506	0.0447812	0.0382687	0.0460919	0.047216	0.0457388	0.0405717	0.0454936
Ploid4_2_GenomeCoverage	0.0230022	0.0225775	0.0241069	0.0252454	0.0238015	0.0234535	0.0241091	0.0248856	0.0239855	0.0246555	0.0232046	0.0227056	0.0248011	0.0258969	0.024677	0.0240267	0.0246001	0.0255418	0.0243634	0.0247636	0.0227896	0.022401	0.024022	0.0255881	0.0240655	0.0232805	0.0237136	0.0251533	0.023054	0.0236174	0.0216858	0.0212307	0.0226738	0.0239324	0.0220757	0.02165	0.0222856	0.023371	0.0209427	0.0215577	0.022901	0.0230438	0.0243993	0.0254246	0.0244629	0.0236565	0.0243157	0.0248728	0.0238673
Ploid4_3_GenomeCoverage	0.0304179	0.0302188	0.0297699	0.0305389	0.0295413	0.0300142	0.0297736	0.0303022	0.0270688	0.0263521	0.031057	0.0309511	0.0303157	0.0308393	0.0299827	0.0301513	0.0305572	0.0305478	0.0274813	0.0270684	0.0304726	0.0300424	0.0300706	0.0302346	0.0295145	0.0297483	0.0302464	0.0300488	0.0269894	0.0263786	0.0298017	0.0280996	0.0276613	0.0280003	0.0273331	0.0279035	0.028104	0.0279681	0.0265841	0.0263085	0.0317429	0.0306128	0.0298087	0.0307287	0.0299867	0.0302103	0.0303734	0.030792	0.0279316
Ploid4_4_GenomeCoverage	0.0386709	0.0513831	0.046926	0.0410747	0.0475108	0.049018	0.0473926	0.0434406	0.047185	0.0488479	0.0388004	0.0515414	0.0465445	0.0404489	0.0470194	0.0490012	0.0471133	0.0434898	0.0472982	0.0491462	0.0370114	0.0491224	0.0440107	0.0384539	0.0447636	0.0461285	0.0448028	0.0406734	0.0453073	0.0470262	0.0312091	0.0416914	0.0374458	0.0328221	0.0383438	0.0395488	0.0383613	0.0350007	0.0391823	0.04057	0.0386647	0.0511177	0.0467795	0.0405773	0.046795	0.0484324	0.0467651	0.0429727	0.0469277
Ploid5_2_GenomeCoverage	0.0122693	0.0123427	0.0131617	0.0133038	0.0134903	0.0133507	0.0136046	0.0133048	0.0145121	0.0148868	0.0121159	0.0119355	0.0129281	0.0129354	0.0131724	0.0130895	0.0132793	0.0131245	0.0142562	0.0146481	0.0129721	0.0130662	0.0141329	0.0143683	0.014195	0.014099	0.0144119	0.0142838	0.015321	0.0155835	0.0126626	0.012963	0.0139456	0.0144767	0.013904	0.0138359	0.0140231	0.014101	0.0138383	0.0143767	0.0122915	0.0125581	0.0133845	0.0134152	0.0133399	0.0135744	0.0135528	0.0135517	0.0145172
Ploid5_3_GenomeCoverage	0.0155912	0.0158056	0.015296	0.0160325	0.0152439	0.0151853	0.015089	0.0156713	0.0142752	0.0137353	0.0152582	0.0156232	0.0151212	0.0158014	0.0149999	0.0151	0.0150674	0.0152994	0.0136852	0.0133904	0.0168398	0.0170064	0.0165118	0.0175428	0.0167231	0.0164237	0.0167475	0.0169659	0.0152144	0.0151159	0.0174364	0.0170924	0.0168839	0.0171053	0.0165143	0.016791	0.01669	0.0173855	0.015633	0.0153608	0.0163597	0.0163325	0.015679	0.0164156	0.0156501	0.0156751	0.015804	0.0161962	0.0146651
Ploid5_4_GenomeCoverage	0.0250861	0.0313183	0.0292821	0.0265702	0.029334	0.0302975	0.0293204	0.0276573	0.0273984	0.0284571	0.0245033	0.0303884	0.0281541	0.0254455	0.0283614	0.0291043	0.0283225	0.0267789	0.0268252	0.0274232	0.0261386	0.0327938	0.030432	0.0268817	0.0304599	0.031572	0.0304043	0.0287211	0.0289635	0.0299004	0.0240835	0.0292943	0.0276251	0.0247007	0.0273028	0.0283464	0.0275443	0.0255486	0.0273319	0.0286083	0.025207	0.0305179	0.0286084	0.0259414	0.0290221	0.0296877	0.0288991	0.0270702	0.0276352
Ploid6_2_GenomeCoverage	0.0100745	0.00967635	0.0104906	0.01008	0.0106369	0.0108983	0.0107934	0.010499	0.0113205	0.0116183	0.0102552	0.01003	0.0109238	0.0109405	0.0114957	0.0113635	0.0114116	0.0113479	0.0118912	0.0122741	0.0140242	0.0134829	0.014481	0.0144747	0.0151355	0.0149324	0.0151503	0.0145001	0.0160263	0.0164353	0.0260326	0.0252465	0.0273061	0.0274622	0.0277107	0.0271319	0.027681	0.0279967	0.0279674	0.0287396	0.0128323	0.0131471	0.0136086	0.0134953	0.0138987	0.0138726	0.0140564	0.01412	0.0150495
Ploid6_3_GenomeCoverage	0.0123237	0.0126174	0.011978	0.0124078	0.011787	0.0117234	0.0121669	0.0123236	0.0118684	0.0116457	0.0128863	0.013584	0.0127086	0.0127369	0.012929	0.0128902	0.0126976	0.0130996	0.0126716	0.0124846	0.0175281	0.0178946	0.0166269	0.0170314	0.0169114	0.0168718	0.0169824	0.017241	0.0165964	0.016079	0.0317988	0.033652	0.031095	0.0323484	0.0310102	0.031395	0.0318044	0.0322781	0.0297579	0.0293799	0.0162344	0.0168543	0.0160091	0.0162616	0.0159076	0.0158515	0.0160693	0.0167845	0.0157694
Ploid6_4_GenomeCoverage	0.0324276	0.0367857	0.0354043	0.0340961	0.035951	0.0358599	0.0356251	0.0344922	0.0329425	0.0339158	0.0352961	0.0397894	0.0382721	0.0369552	0.0378198	0.0381671	0.0384366	0.0364975	0.0349754	0.0366367	0.0438119	0.0505305	0.0493631	0.0465622	0.0486558	0.0495874	0.0490632	0.0475798	0.0452492	0.047083	0.0744881	0.085527	0.0841779	0.0784208	0.0841421	0.086672	0.0844902	0.0797779	0.0810192	0.0836652	0.0423858	0.0465197	0.0459215	0.0441351	0.045962	0.0467241	0.0459977	0.0438999	0.0434855
[truncated: 1 more columns]

## Sheet: Table 6
Supplementary Table 6 Gene conversions between sweet potato subgenomes
Sweet potato cultivars	B2 to B1	B1 to B2	Other	Number of haplotype blocks	Tree method
Huarmeyano	0.0970996	0.430013	0.472888	793	UPGMA
NASPOT5/58	0.0966921	0.437659	0.465649	786	UPGMA
NK259L	0.0796253	0.411007	0.509368	854	UPGMA
Yuzi7	0.0959004	0.412884	0.491215	1366	UPGMA
Y601	0.0936353	0.410649	0.495716	1634	UPGMA

## Sheet: Table 7
Supplementary Table 7 Genes with top 1% of π ratio, Fst and XP-CLR scores
Note: NA of PiRatio, Fst and XP-CLR indicates its values are not in top 1%
	Chrom	Begin	End	Gene	Function	PiRatio	Fst	xpclr	FuncPfam	FuncInterPro	GOenrich	Gwas	GOTERM	KO	Function	ONTOLOGY	TERM	Pathway			ATfunction
2449	LG1	580013	586879	g97	PREDICTED: uncharacterized protein LOC102593629 [Solanum tuberosum]	NA	0.27	NA			NA	NA	NA	K14400	PCF11; pre-mRNA cleavage complex 2 protein Pcf11	A09120 Genetic Information Processing	09122 Translation	03015 mRNA surveillance pathway [PATH:ko03015]			AT2G36480.1 | Symbols: | ENTH/VHS family protein
2478	LG1	588740	590379	g98	LG1 AUGUSTUS gene 588740 590379 0.1 - .	NA	0.27	NA			NA	NA	NA	NA	NA	NA	NA	NA			NA
2489	LG1	594564	597988	g99	PREDICTED: uncharacterized protein LOC104114427 isoform X1 [Nicotiana tomentosiformis]	NA	0.28,0.27	NA			NA	NA	NA	NA	NA	NA	NA	NA			AT3G48860.1 | Symbols: | unknown protein; INVOLVED IN: biological_process unknown; LOCATED IN: plasma membrane; EXPRESSED IN: 22 plant structures; EXPRESSED DURING: 13 growth stages; BEST Arabidopsis thaliana protein match is: unknown protein (TAIR:AT5G23700.1); Has 12232 Blast hits to 9546 proteins in 892 species: Archae - 172; Bacteria - 1174; Metazoa - 6487; Fungi - 1343; Plants - 856; Viruses…
2518	LG1	603970	604549	g100	LG1 AUGUSTUS gene 603970 604549 0.12 - .	NA	0.32,0.28,0.27	NA			NA	NA	NA	NA	NA	NA	NA	NA			NA
2526	LG1	606784	607316	g101	LG1 AUGUSTUS gene 606784 607316 0.05 + .	NA	0.32,0.28,0.27	NA			NA	NA	NA	NA	NA	NA	NA	NA			NA
2537	LG1	608299	611149	g102	unnamed protein product [Solanum lycopersicum]	NA	0.32,0.28,0.27	NA			NA	NA	NA	NA	NA	NA	NA	NA			AT4G38180.1 | Symbols: FRS5 | FAR1-related sequence 5
2567	LG1	622274	624928	g103	PREDICTED: NAC domain-containing protein 100-like [Sesamum indicum]	NA	0.32,0.31,0.28,0.28,0.27	NA	No apical meristem (NAM) protein; PB1 domain	NAC domain; PB1 domain	NA	NA	DNA binding | regulation of transcription, DNA-templated	NA	NA	NA	NA	NA			AT5G07680.1 | Symbols: ANAC080, ANAC079, ATNAC4, NAC080 | NAC domain containing protein 80
2578	LG1	628314	632425	g104	PREDICTED: NAC domain-containing protein 100-like [Nicotiana tomentosiformis]	NA	0.32,0.31,0.28,0.28,0.27	NA	PB1 domain; No apical meristem (NAM) protein	PB1 domain; NAC domain	NA	NA	protein binding	NA	NA	NA	NA	NA			AT5G61430.1 | Symbols: ANAC100, ATNAC5, NAC100 | NAC domain containing protein 100
2601	LG1	633944	635297	g105	LG1 AUGUSTUS gene 633944 635297 0.1 + .	1.48	0.32,0.31,0.3,0.28,0.28,0.27	NA	PB1 domain	PB1 domain	NA	NA	protein binding	NA	NA	NA	NA	NA			NA
2612	LG1	636145	638909	g106	PREDICTED: uncharacterized protein LOC105164266 [Sesamum indicum]	1.48	0.32,0.31,0.3,0.28,0.28,0.27	NA			NA	NA	NA	NA	NA	NA	NA	NA			AT4G04650.1 | Symbols: | RNA-directed DNA polymerase (reverse transcriptase)-related family protein
2626	LG1	640534	642049	g107	PREDICTED: NAC domain-containing protein 100-like [Sesamum indicum]	1.51,1.48	0.32,0.31,0.3,0.29,0.28,0.28,0.27	NA	No apical meristem (NAM) protein; PB1 domain	NAC domain; PB1 domain	NA	NA	DNA binding | regulation of transcription, DNA-templated	NA	NA	NA	NA	NA			AT5G61430.1 | Symbols: ANAC100, ATNAC5, NAC100 | NAC domain containing protein 100
2637	LG1	643274	646384	g108	PREDICTED: 6-phosphogluconate dehydrogenase, decarboxylating 2, chloroplastic [Nicotiana tomentosiformis]	1.51,1.48	0.32,0.31,0.3,0.29,0.28,0.28,0.27	NA			NA	NA	NA	NA	NA	NA	NA	NA			NA
2654	LG1	652254	658222	g109	LG1 AUGUSTUS gene 652254 658222 0.12 + .	1.53,1.51,1.48	0.32,0.31,0.3,0.29,0.29,0.28,0.28,0.27	NA	PB1 domain	PB1 domain	NA	NA	protein binding	NA	NA	NA	NA	NA			NA
2666	LG1	660674	661667	g110	LG1 AUGUSTUS gene 660674 661667 0.2 + .	1.53,1.51,1.51,1.48	0.32,0.31,0.3,0.29,0.29,0.29,0.28,0.28,0.27	NA			NA	NA	NA	NA	NA	NA	NA	NA			NA
2675	LG1	666434	667953	g111	PREDICTED: NAC domain-containing protein 100-like [Sesamum indicum]	1.53,1.51,1.51,1.48	0.32,0.31,0.3,0.29,0.29,0.29,0.28,0.28,0.27	NA	No apical meristem (NAM) protein	NAC domain	NA	NA	DNA binding | regulation of transcription, DNA-templated	NA	NA	NA	NA	NA			AT5G61430.1 | Symbols: ANAC100, ATNAC5, NAC100 | NAC domain containing protein 100
2686	LG1	672876	674757	g112	LG1 AUGUSTUS gene 672876 674757 0.12 + .	1.53,1.51,1.51,1.48	0.32,0.31,0.3,0.29,0.29,0.29,0.28,0.28,0.28	NA	PB1 domain	PB1 domain	NA	NA	protein binding	NA	NA	NA	NA	NA			NA
2697	LG1	678876	681467	g113	PREDICTED: uncharacterized protein LOC104220915 [Nicotiana sylvestris]	1.53,1.51,1.51,1.48	0.32,0.31,0.3,0.29,0.29,0.29,0.28,0.28,0.28	NA			NA	NA	NA	NA	NA	NA	NA	NA			NA
2717	LG1	682046	684101	g114	LG1 AUGUSTUS gene 682046 684101 0.15 - .	1.53,1.51,1.51,1.48	0.32,0.31,0.3,0.29,0.29,0.29,0.28,0.28,0.28,0.27	NA			NA	NA	NA	NA	NA	NA	NA	NA			NA
2728	LG1	684336	686484	g115	LG1 AUGUSTUS gene 684336 686484 0.03 + .	1.53,1.51,1.51,1.48	0.32,0.31,0.3,0.29,0.29,0.29,0.28,0.28,0.28,0.27	NA			NA	NA	NA	NA	NA	NA	NA	NA			NA
2740	LG1	687776	689063	g116	PREDICTED: NAC domain-containing protein 100-like [Nicotiana tomentosiformis]	1.53,1.51,1.51,1.48	0.32,0.31,0.3,0.29,0.29,0.29,0.28,0.28,0.27	NA			NA	NA	NA	NA	NA	NA	NA	NA			AT5G61430.1 | Symbols: ANAC100, ATNAC5, NAC100 | NAC domain containing protein 100
2757	LG1	690386	691749	g117	LG1 AUGUSTUS gene 690386 691749 0.01 + .	1.53,1.51,1.51,1.48	0.32,0.31,0.3,0.29,0.29,0.29,0.28,0.28,0.27	NA	PB1 domain	PB1 domain	NA	NA	protein binding	NA	NA	NA	NA	NA			NA
2774	LG1	692884	693401	g118	LG1 AUGUSTUS gene 692884 693401 0.24 - .	1.53,1.51,1.51,1.48	0.32,0.31,0.3,0.29,0.29,0.29,0.28,0.28,0.27	NA			NA	NA	NA	NA	NA	NA	NA	NA			NA
2782	LG1	694948	695711	g119	PREDICTED: NAC domain-containing protein 100-like, partial [Solanum tuberosum]	1.53,1.51,1.51,1.48	0.32,0.31,0.3,0.29,0.29,0.29,0.28,0.28,0.27	NA			NA	NA	NA	NA	NA	NA	NA	NA			NA
2793	LG1	696436	697852	g120	PREDICTED: nuA4 complex subunit EAF3 homolog isoform X1 [Nicotiana sylvestris]	1.53,1.51,1.51,1.48	0.31,0.3,0.29,0.29,0.29,0.28,0.28,0.27	NA			NA	NA	NA	NA	NA	NA	NA	NA			NA
2802	LG1	701924	704371	g121	PREDICTED: protein OBERON 1 [Nicotiana sylvestris]	1.53,1.51,1.51,1.48	0.3,0.29,0.29,0.29,0.28,0.28,0.27	NA			NA	NA	NA	NA	NA	NA	NA	NA			AT1G05410.2 | Symbols: | Protein of unknown function (DUF1423)
2820	LG1	704645	717731	g122	PREDICTED: protein OBERON 2-like isoform X1 [Solanum tuberosum]	1.53,1.51,1.51,1.48	0.3,0.29,0.29,0.29,0.28,0.27	NA			NA	NA	NA	NA	NA	NA	NA	NA			NA
2830	LG1	721926	723819	g123	LG1 AUGUSTUS gene 721926 723819 0.04 + .	1.53,1.51,1.51,1.48	0.3,0.29,0.29,0.29,0.28,0.27	NA			NA	NA	NA	NA	NA	NA	NA	NA			NA
2839	LG1	724586	726912	g124	copia LTR rider [Solanum lycopersicum]	1.53,1.51,1.51	0.29,0.29,0.29,0.28,0.27	NA			NA	NA	NA	NA	NA	NA	NA	NA			NA
2862	LG1	727926	730309	g125	LG1 AUGUSTUS gene 727926 730309 0.02 + .	1.53,1.51	0.29,0.29,0.28,0.27	NA			NA	NA	NA	NA	NA	NA	NA	NA			NA
2874	LG1	736439	740491	g126	LG1 AUGUSTUS gene 736439 740491 0.14 - .	1.53,1.51	0.29,0.29,0.28,0.27	NA			NA	NA	NA	NA	NA	NA	NA	NA			NA
2883	LG1	741200	745781	g127	Polyprotein, putative [Solanum demissum]	1.53,1.51	0.29,0.29,0.28,0.27	NA			NA	NA	NA	NA	NA	NA	NA	NA			AT4G23160.1 | Symbols: CRK8 | cysteine-rich RLK (RECEPTOR-like protein kinase) 8
2912	LG1	745896	748260	g128	PREDICTED: WPP domain-interacting protein 2 [Nicotiana tomentosiformis]	1.51	0.29,0.28,0.27	NA			NA	NA	NA	NA	NA	NA	NA	NA			NA
2929	LG1	749096	754210	g129	PREDICTED: uncharacterized protein LOC104645991 [Solanum lycopersicum]	1.51	0.29,0.28,0.27	NA			NA	NA	NA	NA	NA	NA	NA	NA			AT3G24255.1 | Symbols: | RNA-directed DNA polymerase (reverse transcriptase)-related family protein
2970	LG1	755083	757081	g130	PREDICTED: zinc finger protein ZAT2 [Solanum lycopersicum]	1.51	0.28,0.27	NA			NA	NA	NA	NA	NA	NA	NA	NA			AT4G35280.1 | Symbols: | C2H2-like zinc finger protein
2979	LG1	759866	763681	g131	PREDICTED: uncharacterized WD repeat-containing protein C2A9.03-like [Nicotiana sylvestris]	NA	0.27	NA	WD domain, G-beta repeat	WD40 repeat	NA	NA	protein binding	NA	NA	NA	NA	NA			AT3G13340.2 | Symbols: | Transducin/WD40 repeat-like superfamily protein
3012	LG1	765283	771191	g132	PREDICTED: phosphatidylinositol/phosphatidylcholine transfer protein SFH13-like [Sesamum indicum]	NA	0.27	NA			NA	NA	NA	NA	NA	NA	NA	NA			NA
3066	LG1	776441	779721	g133	PREDICTED: ubiquitin-conjugating enzyme E2 28-like [Solanum tuberosum]	NA	0.27	NA			NA	NA	NA	K06689	UBE2D, UBC4, UBC5; ubiquitin-conjugating enzyme E2 D [EC:2.3.2.23]	A09120 Genetic Information Processing	09123 Folding, sorting and degradation	04141 Protein processing in endoplasmic reticulum [PATH:ko04141]			AT1G64230.2 | Symbols: UBC28 | ubiquitin-conjugating enzyme 28
6188	LG1	1433589	1434249	g273	PREDICTED: uncharacterized protein LOC104108756 [Nicotiana tomentosiformis]	NA	NA	6.86			NA	NA	NA	NA	NA	NA	NA	NA			AT4G33560.1 | Symbols: | Wound-responsive family protein
6196	LG1	1436479	1438832	g274	PREDICTED: vesicle-associated protein 4-1-like isoform X2 [Nicotiana sylvestris]	NA	NA	6.86			NA	NA	NA	NA	NA	NA	NA	NA			AT4G21450.1 | Symbols: | PapD-like superfamily protein
6222	LG1	1438846	1441134	g275	PREDICTED: uncharacterized protein LOC104087410 [Nicotiana tomentosiformis]	NA	NA	6.86			NA	NA	NA	NA	NA	NA	NA	NA			AT5G54240.1 | Symbols: | Protein of unknown function (DUF1223)
6239	LG1	1441419	1443295	g276	PREDICTED: cyclic nucleotide-gated ion channel 4 [Sesamum indicum]	NA	NA	6.86	Dynein light chain type 1	Dynein light chain, type 1/2	NA	NA	microtubule-based process | dynein complex	K10418	DYNLL; dynein light chain LC8-type	A09150 Organismal Systems	09155 Excretory system	04962 Vasopressin-regulated water reabsorption [PATH:ko04962]			NA
6253	LG1	1443772	1448794	g277	PREDICTED: cyclic nucleotide-gated ion channel 4 [Sesamum indicum]	NA	NA	6.86	Ion transport protein	Ion transport domain	NA	NA	ion channel activity | ion transport | membrane | transmembrane transport	NA	NA	NA	NA	NA			AT5G54250.2 | Symbols: ATCNGC4, CNGC4, HLM1, DND2 | cyclic nucleotide-gated cation channel 4
6279	LG1	1450003	1453534	g278	PREDICTED: uncharacterized protein DDB_G0271670-like [Solanum tuberosum]	NA	NA	6.86			NA	NA	NA	NA	NA	NA	NA	NA			NA
6308	LG1	1454709	1457819	g279	PREDICTED: probable galacturonosyltransferase 10 isoform X1 [Sesamum indicum]	NA	NA	6.86	Glycosyl transferase family 8	Glycosyl transferase, family 8	NA	NA	transferase activity, transferring glycosyl groups	K13648	GAUT; alpha-1,4-galacturonosyltransferase [EC:2.4.1.43]	A09100 Metabolism	09101 Carbohydrate metabolism	00520 Amino sugar and nucleotide sugar metabolism [PATH:ko00520]			AT2G20810.1 | Symbols: GAUT10, LGT4 | galacturonosyltransferase 10
6325	LG1	1457879	1459654	g280	chlorophyll a-b binding protein 13, chloroplastic-like protein [Nicotiana tabacum]	NA	NA	6.86			NA	NA	NA	K08914	LHCB3; light-harvesting complex II chlorophyll a/b binding protein 3	A09100 Metabolism	09102 Energy metabolism	00196 Photosynthesis - antenna proteins [PATH:ko00196]			AT5G54270.1 | Symbols: LHCB3, LHCB3*1 | light-harvesting chlorophyll B-binding protein 3
6339	LG1	1459680	1466854	g281	PREDICTED: myosin-2-like isoform X2 [Nicotiana sylvestris]	NA	NA	6.86	IQ calmodulin-binding motif; Myosin head (motor domain)	IQ motif, EF-hand binding site; Myosin head, motor domain	NA	NA	protein binding	K10357	MYO5; myosin V	A09160 Human Diseases	09171 Infectious disease: bacterial	05130 Pathogenic Escherichia coli infection [PATH:ko05130]			AT5G54280.2 | Symbols: ATM2, ATMYOS1, ATM4 | myosin 2
6410	LG1	1469289	1475020	g282	PREDICTED: B3 domain-containing protein Os07g0563300-like isoform X1 [Sesamum indicum]	NA	NA	6.86	B3 DNA binding domain	B3 DNA binding domain	NA	NA	DNA binding	NA	NA	NA	NA	NA			AT4G32010.1 | Symbols: HSL1, HSI2-L1, VAL2 | HSI2-like 1
6451	LG1	1475505	1480134	g283	PREDICTED: probable ADP-ribosylation factor GTPase-activating protein AGD5 [Nicotiana sylvestris]	NA	NA	6.86	Putative GTPase activating protein for Arf	Arf GTPase activating protein	NA	NA	GTPase activator activity	K12486	SMAP; stromal membrane-associated protein	A09140 Cellular Processes	09141 Transport and catabolism	04144 Endocytosis [PATH:ko04144]			AT5G54310.1 | Symbols: NEV, AGD5 | ARF-GAP domain 5
6492	LG1	1481569	1483535	g284	LG1 AUGUSTUS gene 1481569 1483535 0.1 + .	NA	NA	6.86			NA	NA	NA	NA	NA	NA	NA	NA			NA
6501	LG1	1484409	1485229	g285	PREDICTED: uncharacterized protein LOC104212235 [Nicotiana sylvestris]	NA	NA	6.86			NA	NA	NA	NA	NA	NA	NA	NA			NA
6512	LG1	1486579	1490169	g286	PREDICTED: receptor-like protein kinase THESEUS 1 [Nicotiana sylvestris]	NA	NA	6.86	Protein tyrosine and serine/threonine kinase	Serine-threonine/tyrosine-protein kinase, catalytic domain	NA	NA	protein kinase activity | protein phosphorylation	NA	NA	NA	NA	NA			AT5G54380.1 | Symbols: THE1 | protein kinase family protein
6524	LG1	1490729	1501814	g287	PREDICTED: uncharacterized protein LOC101245382 [Solanum lycopersicum]	NA	NA	6.86			NA	NA	NA	NA	NA	NA	NA	NA			AT4G21570.1 | Symbols: | Protein of unknown function (DUF300)
6604	LG1	1504025	1505644	g288	PREDICTED: NAC domain-containing protein 72 [Nicotiana tomentosiformis]	NA	NA	6.86	No apical meristem (NAM) protein	NAC domain	NA	NA	DNA binding | regulation of transcription, DNA-templated	NA	NA	NA	NA	NA			AT4G27410.2 | Symbols: RD26, ANAC072 | NAC (No Apical Meristem) domain transcriptional regulator superfamily protein
6618	LG1	1517581	1521744	g289	PREDICTED: beta-glucosidase 18-like isoform X1 [Nicotiana tomentosiformis]	NA	NA	6.86	Glycosyl hydrolase family 1	Glycoside hydrolase family 1	NA	NA	hydrolase activity, hydrolyzing O-glycosyl compounds | carbohydrate metabolic process	K05350	bglB; beta-glucosidase [EC:3.2.1.21]	A09100 Metabolism	09101 Carbohydrate metabolism	00500 Starch and sucrose metabolism [PATH:ko00500]			AT1G61820.1 | Symbols: BGLU46 | beta glucosidase 46
6659	LG1	1522205	1522674	g290	LG1 AUGUSTUS gene 1522205 1522674 0.03 - .	NA	NA	6.86			NA	NA	NA	NA	NA	NA	NA	NA			NA
6667	LG1	1523919	1527938	g291	PREDICTED: beta-glucosidase 18-like isoform X1 [Nicotiana tomentosiformis]	NA	NA	6.86	Glycosyl hydrolase family 1	Glycoside hydrolase family 1	NA	NA	hydrolase activity, hydrolyzing O-glycosyl compounds | carbohydrate metabolic process	K05350	bglB; beta-glucosidase [EC:3.2.1.21]	A09100 Metabolism	09101 Carbohydrate metabolism	00500 Starch and sucrose metabolism [PATH:ko00500]			AT1G61820.1 | Symbols: BGLU46 | beta glucosidase 46
6714	LG1	1528869	1540028	g292	PREDICTED: beta-glucosidase 18-like isoform X1 [Nicotiana tomentosiformis]	NA	NA	6.86	Glycosyl hydrolase family 1	Glycoside hydrolase family 1	NA	NA	hydrolase activity, hydrolyzing O-glycosyl compounds | carbohydrate metabolic process	K05350	bglB; beta-glucosidase [EC:3.2.1.21]	A09100 Metabolism	09101 Carbohydrate metabolism	00500 Starch and sucrose metabolism [PATH:ko00500]			AT1G61820.1 | Symbols: BGLU46 | beta glucosidase 46
6798	LG1	1540211	1541654	g293	PREDICTED: TMV resistance protein N-like [Nicotiana tomentosiformis]	NA	NA	6.86	TIR domain	Toll/interleukin-1 receptor homology (TIR) domain	NA	NA	protein binding | signal transduction	NA	NA	NA	NA	NA			AT1G61105.1 | Symbols: | Toll-Interleukin-Resistance (TIR) domain family protein
6809	LG1	1549276	1550248	g294	hypothetical protein SDM1_56t00017 [Solanum demissum]	NA	NA	6.86			NA	NA	NA	NA	NA	NA	NA	NA			NA
6820	LG1	1551396	1553275	g295	PREDICTED: uncharacterized protein LOC104101790 [Nicotiana tomentosiformis]	NA	NA	6.86			NA	NA	NA	NA	NA	NA	NA	NA			AT1G52910.1 | Symbols: | Protein of unknown function (DUF1218)
6837	LG1	1556416	1562512	g296	PREDICTED: uncharacterized protein LOC101249662 isoform X1 [Solanum lycopersicum]	NA	NA	6.86	WD domain, G-beta repeat	WD40 repeat	NA	NA	protein binding	K20241	WDR44, RAB11BP; WD repeat-containing protein 44	A09180 Brite Hierarchies	09182 Protein families: genetic information processing	04131 Membrane trafficking [BR:ko04131]			AT5G54200.1 | Symbols: | Transducin/WD40 repeat-like superfamily protein
6863	LG1	1563186	1565896	g297	PREDICTED: protochlorophyllide reductase, chloroplastic-like [Nicotiana sylvestris]	NA	NA	6.86	short chain dehydrogenase	Short-chain dehydrogenase/reductase SDR	NA	NA	oxidation-reduction process	K00218	por; protochlorophyllide reductase [EC:1.3.1.33]	A09100 Metabolism	09108 Metabolism of cofactors and vitamins	00860 Porphyrin and chlorophyll metabolism [PATH:ko00860]			AT5G54190.1 | Symbols: PORA | protochlorophyllide oxidoreductase A
6880	LG1	1567126	1573636	g298	PREDICTED: uncharacterized protein LOC104107441 isoform X1 [Nicotiana tomentosiformis]	NA	NA	6.86			NA	NA	NA	NA	NA	NA	NA	NA			AT3G15390.1 | Symbols: SDE5 | silencing defective 5
6925	LG1	1573730	1579081	g299	PREDICTED: choline transporter-like protein 2 [Nicotiana tomentosiformis]	NA	NA	6.86	Plasma-membrane choline transporter	Choline transporter-like	NA	NA	transmembrane transporter activity | transmembrane transport	K15377	SLC44A2_4_5; solute carrier family 44 (choline transporter-like protein), member 2/4/5	A09160 Human Diseases	09161 Cancer: overview	05231 Choline metabolism in cancer [PATH:ko05231]			AT3G15380.1 | Symbols: | Plasma-membrane choline transporter family protein
6960	LG1	1581786	1585084	g300	PREDICTED: probable carboxylesterase 16 [Nicotiana tomentosiformis]	NA	NA	6.86	alpha/beta hydrolase fold	Alpha/beta hydrolase fold-3	NA	NA	hydrolase activity	NA	NA	NA	NA	NA			AT5G14310.1 | Symbols: AtCXE16, CXE16 | carboxyesterase 16
6971	LG1	1585496	1587300	g301	PREDICTED: uncharacterized protein LOC104116220 [Nicotiana tomentosiformis]	NA	NA	6.86			NA	NA	NA	NA	NA	NA	NA	NA			AT3G27340.1 | Symbols: | FUNCTIONS IN: molecular_function unknown; INVOLVED IN: oxidation reduction; EXPRESSED IN: 23 plant structures; EXPRESSED DURING: 15 growth stages; CONTAINS InterPro DOMAIN/s: Gamma-butyrobetaine dioxygenase/Trimethyllysine dioxygenase, N-terminal (InterPro:IPR010376); Has 1035 Blast hits to 1035 proteins in 399 species: Archae - 0; Bacteria - 765; Metazoa - 0; Fungi - 0; …
6988	LG1	1588496	1594506	g302	peptidyl serine alpha-galactosyltransferase [Nicotiana tabacum]	NA	NA	6.86			NA	NA	NA	K20781	SGT1; peptidyl serine alpha-galactosyltransferase [EC:2.4.1.-]	A09100 Metabolism	09107 Glycan biosynthesis and metabolism	00514 Other types of O-glycan biosynthesis [PATH:ko00514]			AT3G01720.1 | Symbols: | unknown protein; FUNCTIONS IN: molecular_function unknown; INVOLVED IN: biological_process unknown; LOCATED IN: endomembrane system; EXPRESSED IN: 24 plant structures; EXPRESSED DURING: 13 growth stages; BEST Arabidopsis thaliana protein match is: unknown protein (TAIR:AT5G25265.1); Has 374 Blast hits to 211 proteins in 23 species: Archae - 0; Bacteria - 0; Metazoa - 0; F…
7026	LG1	1594515	1597221	g303	mitochondrial succinate dehydrogenase iron sulfur subunit [Solanum lycopersicum]	NA	NA	6.86	2Fe-2S iron-sulfur cluster binding domain	Succinate dehydogenase/fumarate reductase N-terminal	NA	NA	electron transfer activity | iron-sulfur cluster binding	NA	NA	NA	NA	NA			AT5G40650.1 | Symbols: SDH2-2 | succinate dehydrogenase 2-2
7052	LG1	1598476	1599489	g304	PREDICTED: RPM1-interacting protein 4-like [Nicotiana tomentosiformis]	NA	NA	6.86			NA	NA	NA	NA	NA	NA	NA	NA			AT5G63270.1 | Symbols: | RPM1-interacting protein 4 (RIN4) family protein
7066	LG1	1599649	1603691	g305	PREDICTED: zinc finger CCCH domain-containing protein 67-like [Sesamum indicum]	NA	NA	6.86	Zinc finger C-x8-C-x5-C-x3-H type (and similar)	Zinc finger, CCCH-type	NA	NA	metal ion binding	NA	NA	NA	NA	NA			AT3G48440.1 | Symbols: | Zinc finger C-x8-C-x5-C-x3-H type family protein
7095	LG1	1606566	1609681	g306	PREDICTED: very-long-chain 3-oxoacyl-CoA reductase 1 [Nicotiana tomentosiformis]	NA	NA	6.86	short chain dehydrogenase	Short-chain dehydrogenase/reductase SDR	NA	NA	oxidation-reduction process	K10251	HSD17B12, KAR, IFA38; 17beta-estradiol 17-dehydrogenase / very-long-chain 3-oxoacyl-CoA reductase [EC:1.1.1.62 1.1.1.330]	A09100 Metabolism	09103 Lipid metabolism	00062 Fatty acid elongation [PATH:ko00062]			AT1G67730.1 | Symbols: YBR159, KCR1, ATKCR1 | beta-ketoacyl reductase 1
7109	LG1	1611106	1613444	g307	PREDICTED: very-long-chain 3-oxoacyl-CoA reductase 1 [Nicotiana tomentosiformis]	NA	NA	6.86	short chain dehydrogenase	Short-chain dehydrogenase/reductase SDR	NA	NA	oxidation-reduction process	NA	NA	NA	NA	NA			AT1G67730.1 | Symbols: YBR159, KCR1, ATKCR1 | beta-ketoacyl reductase 1
7126	LG1	1613912	1616591	g308	PREDICTED: pentatricopeptide repeat-containing protein At3g46610-like [Solanum tuberosum]	NA	NA	6.86			NA	NA	NA	NA	NA	NA	NA	NA			AT3G46610.1 | Symbols: | Pentatricopeptide repeat (PPR-like) superfamily protein
7137	LG1	1618656	1619938	g309	PREDICTED: BAG family molecular chaperone regulator 2-like [Nicotiana tomentosiformis]	NA	NA	6.86	Ubiquitin family	Ubiquitin-like domain	NA	NA	protein binding	NA	NA	NA	NA	NA			AT5G14360.1 | Symbols: | Ubiquitin-like superfamily protein
7148	LG1	1624351	1628881	g310	PREDICTED: zinc finger protein CONSTANS-LIKE 16-like [Nicotiana tomentosiformis]	NA	NA	6.86	CCT motif	CCT domain	NA	NA	protein binding	NA	NA	NA	NA	NA			AT5G14370.1 | Symbols: | CCT motif family protein
9828	LG1	2235046	2235698	g409	PREDICTED: auxin-induced protein 15A [Solanum lycopersicum]	NA	NA	4.67	Auxin responsive protein	Small auxin-up RNA	NA	NA	response to auxin	K14488	SAUR; SAUR family protein	A09130 Environmental Information Processing	09132 Signal transduction	04075 Plant hormone signal transduction [PATH:ko04075]			AT4G36110.1 | Symbols: | SAUR-like auxin-responsive protein family
9836	LG1	2236991	2241198	g410	PREDICTED: uncharacterized protein LOC105160245 [Sesamum indicum]	NA	NA	4.67			NA	NA	NA	NA	NA	NA	NA	NA			NA
9861	LG1	2242983	2248076	g411	PREDICTED: uncharacterized protein LOC104115130 [Nicotiana tomentosiformis]	NA	NA	4.67			NA	NA	NA	K10767	ALKBH5; mRNA N6-methyladenine demethylase [EC:1.14.11.53]	A09180 Brite Hierarchies	09182 Protein families: genetic information processing	03019 Messenger RNA biogenesis [BR:ko03019]			AT2G17970.1 | Symbols: | 2-oxoglutarate (2OG) and Fe(II)-dependent oxygenase superfamily protein
9885	LG1	2248251	2249598	g412	PREDICTED: WEB family protein At2g17940-like isoform X2 [Nicotiana sylvestris]	NA	NA	4.67			NA	NA	NA	NA	NA	NA	NA	NA			AT2G17940.1 | Symbols: | Plant protein of unknown function (DUF827)
9894	LG1	2250489	2252098	g413	PREDICTED: uncharacterized protein LOC104219502 isoform X1 [Nicotiana sylvestris]	NA	NA	4.67			NA	NA	NA	NA	NA	NA	NA	NA			AT5G66230.1 | Symbols: | Chalcone-flavanone isomerase family protein
9908	LG1	2258185	2262845	g414	PREDICTED: calcium-dependent protein kinase 16-like [Solanum tuberosum]	NA	NA	4.67	EF hand; Protein kinase domain	EF-hand domain; Protein kinase domain	NA	NA	calcium ion binding	K13412	CPK; calcium-dependent protein kinase [EC:2.7.11.1]	A09150 Organismal Systems	09159 Environmental adaptation	04626 Plant-pathogen interaction [PATH:ko04626]			AT2G17890.1 | Symbols: CPK16 | calcium-dependent protein kinase 16
9955	LG1	2263335	2269809	g415	PREDICTED: ferredoxin--NADP reductase, leaf-type isozyme, chloroplastic [Nicotiana sylvestris]	NA	NA	4.67			NA	NA	NA	NA	NA	NA	NA	NA			AT1G20020.1 | Symbols: ATLFNR2, FNR2 | ferredoxin-NADP(+)-oxidoreductase 2
10005	LG1	2270715	2272199	g416	PREDICTED: ferredoxin--NADP reductase, leaf-type isozyme, chloroplastic [Nicotiana tomentosiformis]	NA	NA	4.67	Oxidoreductase NAD-binding domain	Oxidoreductase FAD/NAD(P)-binding	NA	NA	oxidoreductase activity | oxidation-reduction process	NA	NA	NA	NA	NA			AT1G20020.2 | Symbols: ATLFNR2 | ferredoxin-NADP(+)-oxidoreductase 2
10025	LG1	2273055	2274740	g417	PREDICTED: cold shock domain-containing protein 3 [Sesamum indicum]	NA	NA	4.67	Zinc knuckle; 'Cold-shock' DNA-binding domain	Zinc finger, CCHC-type; Cold-shock protein, DNA-binding	NA	NA	nucleic acid binding | zinc ion binding	K09250	CNBP; cellular nucleic acid-binding protein	A09180 Brite Hierarchies	09182 Protein families: genetic information processing	03000 Transcription factors [BR:ko03000]			AT2G17870.1 | Symbols: ATCSP3, CSP3 | cold shock domain protein 3
10033	LG1	2278465	2280633	g418	PREDICTED: pathogenesis-related protein 5-like [Nicotiana tomentosiformis]	NA	NA	4.67			NA	NA	NA	NA	NA	NA	NA	NA			AT4G38660.1 | Symbols: | Pathogenesis-related thaumatin superfamily protein
10047	LG1	2283908	2287320	g419	PREDICTED: calmodulin-lysine N-methyltransferase isoform X2 [Solanum lycopersicum]	NA	NA	4.67			NA	NA	NA	K18826	CAMKMT; calmodulin-lysine N-methyltransferase [EC:2.1.1.60]	A09100 Metabolism	09105 Amino acid metabolism	00310 Lysine degradation [PATH:ko00310]			AT4G35987.1 | Symbols: | S-adenosyl-L-methionine-dependent methyltransferases superfamily protein
10073	LG1	2289225	2290905	g420	PREDICTED: thiosulfate sulfurtransferase 18-like [Solanum tuberosum]	NA	NA	4.67			NA	NA	NA	K22547	HAC1; arsenate reductase [EC:1.20.4.1]	A09190 Not Included in Pathway or Brite	09191 Unclassified: metabolism	99980 Enzymes with EC numbers			AT2G21045.1 | Symbols: | Rhodanese/Cell cycle control phosphatase superfamily protein
10096	LG1	2291625	2296495	g421	PREDICTED: 26S proteasome non-ATPase regulatory subunit 4 homolog isoform X1 [Solanum lycopersicum]	NA	NA	4.67			NA	NA	NA	K03029	PSMD4, RPN10; 26S proteasome regulatory subunit N10	A09120 Genetic Information Processing	09123 Folding, sorting and degradation	03050 Proteasome [PATH:ko03050]			AT4G38630.1 | Symbols: RPN10, MCB1, ATMCB1, MBP1 | regulatory particle non-ATPase 10
10129	LG1	2297035	2300849	g422	PREDICTED: uncharacterized protein LOC101253155 [Solanum lycopersicum]	NA	NA	4.67			NA	NA	NA	K19366	SPG20; spartin	A09140 Cellular Processes	09141 Transport and catabolism	04144 Endocytosis [PATH:ko04144]			AT3G51250.1 | Symbols: | Senescence/dehydration-associated protein-related
10149	LG1	2304505	2311049	g423	PREDICTED: histidine kinase 1 isoform X1 [Nicotiana sylvestris]	NA	NA	4.67	His Kinase A (phospho-acceptor) domain; Response regulator receiver domain	Signal transduction histidine kinase, dimerisation/phosphoacceptor domain; Signal transduction response regulator, receiver domain	NA	NA	phosphorelay sensor kinase activity | signal transduction	NA	NA	NA	NA	NA			AT2G17820.1 | Symbols: ATHK1, AHK1, HK1 | histidine kinase 1
10194	LG1	2311245	2312779	g424	PREDICTED: uncharacterized protein LOC104212218 [Nicotiana sylvestris]	NA	NA	4.67			NA	NA	NA	NA	NA	NA	NA	NA			AT4G35980.1 | Symbols: | unknown protein; FUNCTIONS IN: molecular_function unknown; INVOLVED IN: biological_process unknown; LOCATED IN: cellular_component unknown; EXPRESSED IN: 24 plant structures; EXPRESSED DURING: 15 growth stages; Has 30201 Blast hits to 17322 proteins in 780 species: Archae - 12; Bacteria - 1396; Metazoa - 17338; Fungi - 3422; Plants - 5037; Viruses - 0; Other Eukaryotes - …
10208	LG1	2313185	2315952	g425	PREDICTED: 3-dehydroquinate synthase, chloroplastic [Nicotiana sylvestris]	NA	NA	4.67			NA	NA	NA	K01735	aroB; 3-dehydroquinate synthase [EC:4.2.3.4]	A09100 Metabolism	09105 Amino acid metabolism	00400 Phenylalanine, tyrosine and tryptophan biosynthesis [PATH:ko00400]			AT5G66120.2 | Symbols: | 3-dehydroquinate synthase, putative
10237	LG1	2315979	2320660	g426	PREDICTED: protein prenyltransferase alpha subunit repeat-containing protein 1 [Nicotiana sylvestris]	NA	NA	4.67	Protein prenyltransferase alpha subunit repeat	Protein prenyltransferase, alpha subunit	NA	NA	protein prenyltransferase activity | protein prenylation	K14137	PTAR1; protein prenyltransferase alpha subunit repeat containing protein 1	A09180 Brite Hierarchies	09181 Protein families: metabolism	01006 Prenyltransferases [BR:ko01006]			AT1G10095.1 | Symbols: | Protein prenylyltransferase superfamily protein
10272	LG1	2322255	2324723	g427	PREDICTED: rac-like GTP-binding protein RHO1-like [Solanum tuberosum]	NA	NA	4.67	Ras family	Small GTPase	NA	NA	GTPase activity | GTP binding	K04392	RAC1; Ras-related C3 botulinum toxin substrate 1	A09130 Environmental Information Processing	09132 Signal transduction	04010 MAPK signaling pathway [PATH:ko04010]			AT2G17800.2 | Symbols: ARAC1, ATGP2, ATRAC1, ROP3, ATROP3 | Arabidopsis RAC-like 1
10298	LG1	2325444	2333820	g428	PREDICTED: vacuolar protein sorting-associated protein 35A-like [Nicotiana sylvestris]	NA	NA	4.67	Vacuolar protein sorting-associated protein 35	Vacuolar protein sorting-associated protein 35	NA	NA	protein transport | retromer, cargo-selective complex | retrograde transport, endosome to Golgi	K18468	VPS35; vacuolar protein sorting-associated protein 35	A09140 Cellular Processes	09141 Transport and catabolism	04144 Endocytosis [PATH:ko04144]			AT2G17790.1 | Symbols: VPS35A, ZIP3 | VPS35 homolog A
10372	LG1	2334535	2335205	g429	LG1 AUGUSTUS gene 2334535 2335205 0.03 + .	NA	NA	4.67			NA	NA	NA	NA	NA	NA	NA	NA			NA
10380	LG1	2336519	2344180	g430	PREDICTED: pentatricopeptide repeat-containing protein At5g12100, mitochondrial [Nicotiana sylvestris]	NA	NA	4.67			NA	NA	NA	NA	NA	NA	NA	NA			AT5G12100.1 | Symbols: | pentatricopeptide (PPR) repeat-containing protein
10415	LG1	2345575	2349828	g431	PREDICTED: uncharacterized protein LOC104104610 [Nicotiana tomentosiformis]	NA	NA	4.67	FYVE zinc finger	FYVE zinc finger	NA	NA	metal ion binding	NA	NA	NA	NA	NA			AT1G20110.1 | Symbols: | RING/FYVE/PHD zinc finger superfamily protein
10450	LG1	2355615	2361090	g432	PREDICTED: protein MID1-COMPLEMENTING ACTIVITY 1-like [Nicotiana sylvestris]	NA	NA	4.67			NA	NA	NA	NA	NA	NA	NA	NA			AT4G35920.2 | Symbols: MCA1 | PLAC8 family protein
10483	LG1	2363515	2369371	g433	PREDICTED: protein FD-like [Nicotiana tomentosiformis]	NA	NA	4.67			NA	NA	NA	NA	NA	NA	NA	NA			AT1G15100.1 | Symbols: RHA2A | RING-H2 finger A2A
10501	LG1	2373267	2378650	g434	PREDICTED: la-related protein 1C-like [Nicotiana sylvestris]	NA	NA	4.67			NA	NA	NA	K18757	LARP1; la-related protein 1	A09180 Brite Hierarchies	09182 Protein families: genetic information processing	03019 Messenger RNA biogenesis [BR:ko03019]			AT4G35890.1 | Symbols: | winged-helix DNA-binding transcription factor family protein
10524	LG1	2381455	2387580	g435	PREDICTED: probable protein phosphatase 2C 60 [Nicotiana tomentosiformis]	NA	NA	4.67	Protein phosphatase 2C	PPM-type phosphatase domain	NA	NA	phosphatase activity	K01102	PDP; pyruvate dehydrogenase phosphatase [EC:3.1.3.43]	A09180 Brite Hierarchies	09181 Protein families: metabolism	01009 Protein phosphatases and associated proteins [BR:ko01009]			AT4G38520.2 | Symbols: | Protein phosphatase 2C family protein
10542	LG1	2388082	2390630	g436	PREDICTED: NEP1-interacting protein-like 1 [Solanum lycopersicum]	NA	NA	4.67			NA	NA	NA	NA	NA	NA	NA	NA			AT4G35840.1 | Symbols: | RING/U-box superfamily protein
10562	LG1	2407420	2410570	g437	PREDICTED: probable prolyl 4-hydroxylase 10 [Nicotiana tomentosiformis]	NA	NA	4.67	2OG-Fe(II) oxygenase superfamily	Oxoglutarate/iron-dependent dioxygenase	NA	NA	oxidoreductase activity | oxidation-reduction process	K00472	P4HA; prolyl 4-hydroxylase [EC:1.14.11.2]	A09100 Metabolism	09105 Amino acid metabolism	00330 Arginine and proline metabolism [PATH:ko00330]			AT5G66060.1 | Symbols: | 2-oxoglutarate (2OG) and Fe(II)-dependent oxygenase superfamily protein
10589	LG1	2420237	2422876	g438	LG1 AUGUSTUS gene 2420237 2422876 0.04 - .	NA	NA	4.67			NA	NA	NA	NA	NA	NA	NA	NA			NA
12403	LG1	2919240	2921751	g521	PREDICTED: uncharacterized protein LOC102582984 [Solanum tuberosum]	NA	NA	4.83			NA	NA	NA	NA	NA	NA	NA	NA			AT5G16550.1 | Symbols: | unknown protein; Has 30201 Blast hits to 17322 proteins in 780 species: Archae - 12; Bacteria - 1396; Metazoa - 17338; Fungi - 3422; Plants - 5037; Viruses - 0; Other Eukaryotes - 2996 (source: NCBI BLink).
12414	LG1	2922600	2928897	g522	PREDICTED: WD repeat-containing protein 3-like [Nicotiana tomentosiformis]	NA	NA	4.83	WD domain, G-beta repeat	WD40 repeat	NA	NA	protein binding	K14556	DIP2, UTP12, WDR3; U3 small nucleolar RNA-associated protein 12	A09120 Genetic Information Processing	09122 Translation	03008 Ribosome biogenesis in eukaryotes [PATH:ko03008]			AT3G21540.1 | Symbols: | transducin family protein / WD-40 repeat family protein
12461	LG1	2928934	2934235	g523	PREDICTED: importin-5-like [Nicotiana sylvestris]	NA	NA	4.83			NA	NA	NA	NA	NA	NA	NA	NA			AT5G19820.1 | Symbols: emb2734 | ARM repeat superfamily protein
12517	LG1	2934972	2940455	g524	PREDICTED: importin-5-like [Nicotiana sylvestris]	NA	NA	4.83			NA	NA	NA	K20222	IPO5, KPNB3, RANBP5; importin-5	A09180 Brite Hierarchies	09182 Protein families: genetic information processing	03009 Ribosome biogenesis [BR:ko03009]			AT5G19820.1 | Symbols: emb2734 | ARM repeat superfamily protein
12576	LG1	2945260	2950170	g525	PREDICTED: glutathione S-transferase zeta class-like isoform X1 [Solanum lycopersicum]	NA	NA	4.83	Glutathione S-transferase, N-terminal domain	Glutathione S-transferase, N-terminal	NA	NA	protein binding | glutathione metabolic process	NA	NA	NA	NA	NA			AT2G02380.1 | Symbols: ATGSTZ2, GSTZ2 | glutathione S-transferase (class zeta) 2
12614	LG1	2950650	2952275	g526	LG1 AUGUSTUS gene 2950650 2952275 0.07 + .	NA	NA	4.83			NA	NA	NA	NA	NA	NA	NA	NA			NA
12629	LG1	2952493	2962505	g527	PREDICTED: importin-5-like [Nicotiana sylvestris]	NA	NA	4.83	Reverse transcriptase-like	Ribonuclease H domain	NA	NA	nucleic acid binding | RNA-DNA hybrid ribonuclease activity	K20222	IPO5, KPNB3, RANBP5; importin-5	A09180 Brite Hierarchies	09182 Protein families: genetic information processing	03009 Ribosome biogenesis [BR:ko03009]			AT5G19820.1 | Symbols: emb2734 | ARM repeat superfamily protein
12706	LG1	2964145	2965275	g528	PREDICTED: ethylene-responsive transcription factor 1B-like [Nicotiana tomentosiformis]	NA	NA	4.83	AP2 domain	AP2/ERF domain	NA	NA	DNA-binding transcription factor activity | regulation of transcription, DNA-templated	K14516	ERF1; ethylene-responsive transcription factor 1	A09130 Environmental Information Processing	09132 Signal transduction	04016 MAPK signaling pathway - plant [PATH:ko04016]			AT3G23240.1 | Symbols: ERF1, ATERF1 | ethylene response factor 1
12714	LG1	2973649	2974490	g529	PREDICTED: ethylene-responsive transcription factor 1B-like [Nicotiana tomentosiformis]	NA	NA	4.83	AP2 domain	AP2/ERF domain	NA	NA	DNA-binding transcription factor activity | regulation of transcription, DNA-templated	K14516	ERF1; ethylene-responsive transcription factor 1	A09130 Environmental Information Processing	09132 Signal transduction	04016 MAPK signaling pathway - plant [PATH:ko04016]			AT3G23240.1 | Symbols: ERF1, ATERF1 | ethylene response factor 1
12725	LG1	2979981	2986990	g530	PREDICTED: serine/threonine-protein phosphatase 7 long form homolog [Solanum lycopersicum]	NA	NA	4.83			NA	NA	NA	NA	NA	NA	NA	NA			AT1G48120.1 | Symbols: | hydrolases;protein serine/threonine phosphatases
12764	LG1	2987435	2991330	g531	PREDICTED: uncharacterized protein LOC101249112 [Solanum lycopersicum]	NA	NA	4.83			NA	NA	NA	NA	NA	NA	NA	NA			AT1G49920.1 | Symbols: | MuDR family transposase
12793	LG1	2994485	2995432	g532	S25-XP1 DNA binding protein [Nicotiana tabacum]	NA	NA	4.83	AP2 domain	AP2/ERF domain	NA	NA	DNA-binding transcription factor activity | regulation of transcription, DNA-templated	NA	NA	NA	NA	NA			AT3G23240.1 | Symbols: ERF1, ATERF1 | ethylene response factor 1
12801	LG1	3009015	3013818	g533	PREDICTED: probable receptor protein kinase TMK1 [Nicotiana tomentosiformis]	NA	NA	4.83	Leucine rich repeat; Protein kinase domain	Leucine-rich repeat; Protein kinase domain	NA	NA	protein binding	K00924	E2.7.1.-; kinase [EC:2.7.1.-]	A09190 Not Included in Pathway or Brite	09191 Unclassified: metabolism	99980 Enzymes with EC numbers			AT1G66150.1 | Symbols: TMK1 | transmembrane kinase 1
12821	LG1	3015575	3017080	g534	PREDICTED: U-box domain-containing protein 21 [Nicotiana tomentosiformis]	NA	NA	4.83	U-box domain	U box domain	NA	NA	ubiquitin-protein transferase activity | protein ubiquitination	NA	NA	NA	NA	NA			AT1G66160.1 | Symbols: ATCMPG1, CMPG1 | CYS, MET, PRO, and GLY protein 1
12835	LG1	3017116	3027100	g535	PREDICTED: potassium channel SKOR [Nicotiana tomentosiformis]	NA	NA	4.83	Ion transport protein	Ion transport domain	NA	NA	ion channel activity | ion transport | membrane | transmembrane transport	K21867	AKT, KAT, GORK, SKOR; potassium channel	A09180 Brite Hierarchies	09183 Protein families: signaling and cellular processes	02000 Transporters [BR:ko02000]			AT3G02850.1 | Symbols: SKOR | STELAR K+ outward rectifier
12888	LG1	3033283	3036430	g536	PREDICTED: glutamine synthetase cytosolic isozyme [Sesamum indicum]	NA	NA	4.83	Glutamine synthetase, catalytic domain; Glutamine synthetase, beta-Grasp domain	Glutamine synthetase, catalytic domain; Glutamine synthetase, beta-Grasp domain	NA	NA	glutamate-ammonia ligase activity | nitrogen compound metabolic process	K01915	glnA, GLUL; glutamine synthetase [EC:6.3.1.2]	A09100 Metabolism	09101 Carbohydrate metabolism	00630 Glyoxylate and dicarboxylate metabolism [PATH:ko00630]			AT3G17820.1 | Symbols: ATGSKB6, GLN1.3, GLN1;3 | glutamine synthetase 1.3
12926	LG1	3037235	3038574	g537	PREDICTED: transcription factor bHLH95-like [Nicotiana sylvestris]	NA	NA	4.83			NA	NA	NA	NA	NA	NA	NA	NA			AT1G49770.1 | Symbols: RGE1, ZOU | basic helix-loop-helix (bHLH) DNA-binding superfamily protein
12943	LG1	3048765	3051123	g538	PREDICTED: nudix hydrolase 18, mitochondrial-like [Solanum tuberosum]	NA	NA	4.83	NUDIX domain	NUDIX hydrolase domain	NA	NA	hydrolase activity	K07766	E3.6.1.52; diphosphoinositol-polyphosphate diphosphatase [EC:3.6.1.52]	A09190 Not Included in Pathway or Brite	09191 Unclassified: metabolism	99980 Enzymes with EC numbers			AT1G14860.1 | Symbols: atnudt18, NUDT18 | nudix hydrolase homolog 18
12963	LG1	3051795	3053205	g539	PREDICTED: uncharacterized protein LOC105167724 [Sesamum indicum]	NA	NA	4.83			NA	NA	NA	NA	NA	NA	NA	NA			AT5G17190.1 | Symbols: | FUNCTIONS IN: molecular_function unknown; INVOLVED IN: intracellular protein transport; LOCATED IN: endomembrane system, integral to membrane, endoplasmic reticulum; EXPRESSED IN: 23 plant structures; EXPRESSED DURING: 13 growth stages; CONTAINS InterPro DOMAIN/s: B-cell receptor-associated 31-like (InterPro:IPR008417); BEST Arabidopsis thaliana protein match is: unknown …
12971	LG1	3059015	3061177	g540	PREDICTED: protein TIFY 10B-like isoform X1 [Nicotiana tomentosiformis]	NA	NA	4.83			NA	NA	NA	K13464	JAZ; jasmonate ZIM domain-containing protein	A09130 Environmental Information Processing	09132 Signal transduction	04075 Plant hormone signal transduction [PATH:ko04075]			AT1G70700.2 | Symbols: TIFY7 | TIFY domain/Divergent CCT motif family protein
12994	LG1	3061659	3063570	g541	PREDICTED: GDSL esterase/lipase At5g37690 [Solanum lycopersicum]	NA	NA	4.83	GDSL-like Lipase/Acylhydrolase	GDSL lipase/esterase	NA	NA	hydrolase activity, acting on ester bonds	NA	NA	NA	NA	NA			AT5G37690.1 | Symbols: | SGNH hydrolase-type esterase superfamily protein
13014	LG1	3065188	3066120	g542	PREDICTED: protein RSI-1-like [Solanum tuberosum]	NA	NA	4.83			NA	NA	NA	NA	NA	NA	NA	NA			AT1G74670.1 | Symbols: | Gibberellin-regulated family protein
13028	LG1	3070605	3076353	g543	PREDICTED: probable rhamnogalacturonate lyase B [Nicotiana sylvestris]	NA	NA	4.83			NA	NA	NA	K18195	RGL4, rhiE; rhamnogalacturonan endolyase [EC:4.2.2.23]	A09190 Not Included in Pathway or Brite	09191 Unclassified: metabolism	99980 Enzymes with EC numbers			AT1G09890.1 | Symbols: | Rhamnogalacturonate lyase family protein
13082	LG1	3078935	3083583	g544	PREDICTED: probable rhamnogalacturonate lyase B [Nicotiana sylvestris]	NA	NA	4.83			NA	NA	NA	K18195	RGL4, rhiE; rhamnogalacturonan endolyase [EC:4.2.2.23]	A09190 Not Included in Pathway or Brite	09191 Unclassified: metabolism	99980 Enzymes with EC numbers			AT1G09890.1 | Symbols: | Rhamnogalacturonate lyase family protein
13136	LG1	3083845	3088960	g545	PREDICTED: rhamnogalacturonate lyase B-like [Nicotiana tomentosiformis]	NA	NA	4.83			NA	NA	NA	K18195	RGL4, rhiE; rhamnogalacturonan endolyase [EC:4.2.2.23]	A09190 Not Included in Pathway or Brite	09191 Unclassified: metabolism	99980 Enzymes with EC numbers			AT1G09890.1 | Symbols: | Rhamnogalacturonate lyase family protein
13184	LG1	3093145	3097491	g546	PREDICTED: probable rhamnogalacturonate lyase B [Sesamum indicum]	NA	NA	4.83			NA	NA	NA	K18195	RGL4, rhiE; rhamnogalacturonan endolyase [EC:4.2.2.23]	A09190 Not Included in Pathway or Brite	09191 Unclassified: metabolism	99980 Enzymes with EC numbers			AT2G22620.1 | Symbols: | Rhamnogalacturonate lyase family protein
13237	LG1	3098695	3108012	g547	putative polyprotein [Solanum lycopersicum]	NA	NA	4.83	Integrase core domain	Integrase, catalytic core	DNA integration	NA	DNA integration	NA	NA	NA	NA	NA			AT2G22620.1 | Symbols: | Rhamnogalacturonate lyase family protein
13504	LG1	3161191	3163043	g557	PREDICTED: zinc finger BED domain-containing protein RICESLEEPER 2-like [Nicotiana sylvestris]	NA	NA	12.32	Domain of unknown function (DUF4413); hAT family C-terminal dimerisation region	hAT-like transposase, RNase-H fold; HAT, C-terminal dimerisation domain	NA	NA	DNA binding	NA	NA	NA	NA	NA			AT3G42170.1 | Symbols: | BED zinc finger ;hAT family dimerisation domain
13518	LG1	3166621	3170420	g558	PREDICTED: protein FAR1-RELATED SEQUENCE 5 [Solanum lycopersicum]	NA	NA	12.32	SWIM zinc finger	Zinc finger, SWIM-type	NA	NA	zinc ion binding	NA	NA	NA	NA	NA			AT4G38180.1 | Symbols: FRS5 | FAR1-related sequence 5
13544	LG1	3171106	3177086	g559	LG1 AUGUSTUS gene 3171106 3177086 0.01 - .	NA	NA	12.32			NA	NA	NA	NA	NA	NA	NA	NA			NA
13597	LG1	3178103	3181336	g560	LG1 AUGUSTUS gene 3178103 3181336 0.01 - .	NA	NA	12.32			NA	NA	NA	NA	NA	NA	NA	NA			NA
13606	LG1	3182366	3183546	g561	LG1 AUGUSTUS gene 3182366 3183546 0.19 - .	NA	NA	12.32			NA	NA	NA	NA	NA	NA	NA	NA			NA
13617	LG1	3187431	3192816	g562	PREDICTED: uncharacterized protein LOC105167219 [Sesamum indicum]	NA	NA	12.32	Reverse transcriptase-like	Ribonuclease H domain	NA	NA	nucleic acid binding | RNA-DNA hybrid ribonuclease activity	NA	NA	NA	NA	NA			AT4G29090.1 | Symbols: | Ribonuclease H-like superfamily protein
13637	LG1	3200311	3207442	g563	PREDICTED: dof zinc finger protein DOF5.7-like [Sesamum indicum]	NA	NA	12.32	Dof domain, zinc finger	Zinc finger, Dof-type	NA	NA	DNA binding | regulation of transcription, DNA-templated	NA	NA	NA	NA	NA			AT5G60200.1 | Symbols: TMO6 | TARGET OF MONOPTEROS 6
13648	LG1	3207581	3213050	g564	PREDICTED: probable glycosyltransferase At5g03795 [Nicotiana sylvestris]	NA	NA	12.32			NA	NA	NA	NA	NA	NA	NA	NA			AT4G38040.1 | Symbols: | Exostosin family protein
13674	LG1	3213126	3216666	g565	Polyprotein, putative [Solanum demissum]	NA	NA	12.32			NA	NA	NA	NA	NA	NA	NA	NA			AT4G23160.1 | Symbols: CRK8 | cysteine-rich RLK (RECEPTOR-like protein kinase) 8
13697	LG1	3216848	3220016	g566	PREDICTED: metal transporter Nramp1-like [Sesamum indicum]	NA	NA	12.32	Natural resistance-associated macrophage protein	NRAMP family	NA	NA	membrane | metal ion transport | metal ion transmembrane transporter activity	NA	NA	NA	NA	NA			AT1G15960.1 | Symbols: NRAMP6, ATNRAMP6 | NRAMP metal ion transporter 6
13738	LG1	3223571	3227534	g567	PREDICTED: UDP-glycosyltransferase 91A1-like [Nicotiana sylvestris]	NA	NA	12.32	UDP-glucoronosyl and UDP-glucosyl transferase	UDP-glucuronosyl/UDP-glucosyltransferase	NA	NA	UDP-glycosyltransferase activity	NA	NA	NA	NA	NA			AT2G22590.1 | Symbols: | UDP-Glycosyltransferase superfamily protein
13750	LG1	3228511	3230404	g568	PREDICTED: UDP-glycosyltransferase 91A1-like [Nicotiana sylvestris]	NA	NA	12.32	UDP-glucoronosyl and UDP-glucosyl transferase	UDP-glucuronosyl/UDP-glucosyltransferase	NA	NA	UDP-glycosyltransferase activity	NA	NA	NA	NA	NA			AT2G22590.1 | Symbols: | UDP-Glycosyltransferase superfamily protein
13764	LG1	3231421	3235139	g569	PREDICTED: UDP-glycosyltransferase 91A1-like [Nicotiana sylvestris]	NA	NA	12.32	UDP-glucoronosyl and UDP-glucosyl transferase	UDP-glucuronosyl/UDP-glucosyltransferase	NA	NA	UDP-glycosyltransferase activity	NA	NA	NA	NA	NA			AT2G22590.1 | Symbols: | UDP-Glycosyltransferase superfamily protein
13782	LG1	3236251	3239191	g570	PREDICTED: UDP-glycosyltransferase 91A1-like [Nicotiana sylvestris]	NA	NA	12.32	UDP-glucoronosyl and UDP-glucosyl transferase	UDP-glucuronosyl/UDP-glucosyltransferase	NA	NA	UDP-glycosyltransferase activity	NA	NA	NA	NA	NA			AT2G22590.1 | Symbols: | UDP-Glycosyltransferase superfamily protein
13803	LG1	3242481	3243904	g571	PREDICTED: RNA-binding protein pno1 [Nicotiana tomentosiformis]	NA	NA	12.32			NA	NA	NA	K11884	PNO1, DIM2; RNA-binding protein PNO1	A09180 Brite Hierarchies	09182 Protein families: genetic information processing	03009 Ribosome biogenesis [BR:ko03009]			AT3G13230.1 | Symbols: | RNA-binding KH domain-containing protein
13811	LG1	3244221	3244704	g572	LG1 AUGUSTUS gene 3244221 3244704 0.21 + .	NA	NA	12.32			NA	NA	NA	NA	NA	NA	NA	NA			NA
13819	LG1	3248181	3251739	g573	PREDICTED: receptor-like cytosolic serine/threonine-protein kinase RBK1 isoform X2 [Solanum lycopersicum]	NA	NA	12.32	Protein tyrosine and serine/threonine kinase	Serine-threonine/tyrosine-protein kinase, catalytic domain	NA	NA	protein kinase activity | protein phosphorylation	NA	NA	NA	NA	NA			AT5G65530.1 | Symbols: | Protein kinase superfamily protein
13845	LG1	3253381	3257887	g574	PREDICTED: putative U-box domain-containing protein 50 isoform X1 [Nicotiana tomentosiformis]	NA	NA	12.32	Protein tyrosine and serine/threonine kinase	Serine-threonine/tyrosine-protein kinase, catalytic domain	NA	NA	protein kinase activity | protein phosphorylation	NA	NA	NA	NA	NA			AT5G65500.1 | Symbols: | U-box domain-containing protein kinase family protein
13880	LG1	3259201	3265508	g575	PREDICTED: importin-5-like [Nicotiana sylvestris]	NA	NA	12.32			NA	NA	NA	NA	NA	NA	NA	NA			AT5G19820.1 | Symbols: emb2734 | ARM repeat superfamily protein
13945	LG1	3266829	3267446	g576	LG1 AUGUSTUS gene 3266829 3267446 0.45 - .	NA	NA	12.32			NA	NA	NA	NA	NA	NA	NA	NA			NA
13953	LG1	3268804	3269586	g577	PREDICTED: protein SKIP34 [Solanum lycopersicum]	NA	NA	12.32			NA	NA	NA	NA	NA	NA	NA	NA			AT5G65495.1 | Symbols: | unknown protein; Has 9 Blast hits to 9 proteins in 5 species: Archae - 0; Bacteria - 0; Metazoa - 0; Fungi - 0; Plants - 9; Viruses - 0; Other Eukaryotes - 0 (source: NCBI BLink).
13961	LG1	3270801	3272952	g578	PREDICTED: uncharacterized protein LOC102602851 [Solanum tuberosum]	NA	NA	12.32			NA	NA	NA	NA	NA	NA	NA	NA			AT2G22570.1 | Symbols: ATNIC1, NIC1 | nicotinamidase 1
13981	LG1	3272987	3277156	g579	PREDICTED: polyamine-modulated factor 1-binding protein 1-like [Nicotiana sylvestris]	NA	NA	12.32	KIP1-like protein	Protein Networked (NET), actin-binding (NAB) domain	NA	NA	actin binding	NA	NA	NA	NA	NA			AT2G22560.1 | Symbols: | Kinase interacting (KIP1-like) family protein
13992	LG1	3277582	3280666	g580	PREDICTED: uncharacterized protein LOC102603530 [Solanum tuberosum]	NA	NA	12.32			NA	NA	NA	NA	NA	NA	NA	NA			NA
14004	LG1	3282341	3287101	g581	PREDICTED: mechanosensitive ion channel protein 2, chloroplastic [Nicotiana sylvestris]	NA	NA	12.32	Mechanosensitive ion channel	Mechanosensitive ion channel MscS	NA	NA	membrane | transmembrane transport	K22047	MSL1_2_3; mechanosensitive ion channel protein 1/2/3	A09180 Brite Hierarchies	09183 Protein families: signaling and cellular processes	02000 Transporters [BR:ko02000]			AT5G10490.2 | Symbols: MSL2 | MSCS-like 2
14043	LG1	3287196	3295766	g582	PREDICTED: uncharacterized protein At1g04910-like [Nicotiana sylvestris]	NA	NA	12.32			NA	NA	NA	NA	NA	NA	NA	NA			AT4G24530.1 | Symbols: | O-fucosyltransferase family protein
14082	LG1	3296561	3301237	g583	PREDICTED: kinesin-like protein KCA2 [Nicotiana sylvestris]	NA	NA	12.32	Microtubule binding	Spindle pole body-associated protein Vik1/Cik1, microtubule binding domain	NA	NA	microtubule binding	NA	NA	NA	NA	NA			AT5G65460.1 | Symbols: KCA2, KAC2 | kinesin like protein for actin based chloroplast movement 2
14111	LG1	3301409	3306326	g584	PREDICTED: uncharacterized protein LOC104247899 [Nicotiana sylvestris]	NA	NA	12.32			NA	NA	NA	NA	NA	NA	NA	NA			AT4G23160.1 | Symbols: CRK8 | cysteine-rich RLK (RECEPTOR-like protein kinase) 8
14149	LG1	3306441	3325204	g585	PREDICTED: kinesin-like protein KCA2 [Nicotiana sylvestris]	NA	NA	12.32	Kinesin motor domain	Kinesin motor domain	NA	NA	microtubule motor activity | ATP binding | microtubule-based movement | microtubule binding	NA	NA	NA	NA	NA			AT5G65460.1 | Symbols: KCA2, KAC2 | kinesin like protein for actin based chloroplast movement 2
14253	LG1	3330941	3332660	g586	PREDICTED: uncharacterized protein LOC105176398 [Sesamum indicum]	NA	NA	12.32			NA	NA	NA	NA	NA	NA	NA	NA			AT2G01710.1 | Symbols: | Chaperone DnaJ-domain superfamily protein
14261	LG1	3332892	3334526	g587	LG1 AUGUSTUS gene 3332892 3334526 0.02 - .	NA	NA	12.32	Reverse transcriptase-like	Ribonuclease H domain	NA	NA	nucleic acid binding | RNA-DNA hybrid ribonuclease activity	NA	NA	NA	NA	NA			NA
14272	LG1	3339373	3340076	g588	LG1 AUGUSTUS gene 3339373 3340076 0.28 + .	NA	NA	12.32			NA	NA	NA	NA	NA	NA	NA	NA			NA
14280	LG1	3341643	3342483	g589	LG1 AUGUSTUS gene 3341643 3342483 0.44 + .	NA	NA	12.32			NA	NA	NA	NA	NA	NA	NA	NA			NA
14288	LG1	3344223	3345065	g590	LG1 AUGUSTUS gene 3344223 3345065 0.5 + .	NA	NA	12.32			NA	NA	NA	NA	NA	NA	NA	NA			NA
14296	LG1	3346288	3346778	g591	LG1 AUGUSTUS gene 3346288 3346778 0.31 - .	NA	NA	12.32			NA	NA	NA	NA	NA	NA	NA	NA			AT5G09520.1 | Symbols: | hydroxyproline-rich glycoprotein family protein
14304	LG1	3347283	3347975	g592	LG1 AUGUSTUS gene 3347283 3347975 0.3 + .	NA	NA	12.32			NA	NA	NA	NA	NA	NA	NA	NA			NA
14312	LG1	3348149	3356448	g593	PREDICTED: uncharacterized protein LOC104213525 [Nicotiana sylvestris]	NA	NA	12.32			NA	NA	NA	NA	NA	NA	NA	NA			AT4G24610.1 | Symbols: | unknown protein; FUNCTIONS IN: molecular_function unknown; INVOLVED IN: biological_process unknown; LOCATED IN: plasma membrane; EXPRESSED IN: 20 plant structures; EXPRESSED DURING: 12 growth stages; BEST Arabidopsis thaliana protein match is: unknown protein (TAIR:AT5G65440.1); Has 820 Blast hits to 264 proteins in 74 species: Archae - 0; Bacteria - 15; Metazoa - 77; Fun…
15003	LG1	3553018	3559887	g626	PREDICTED: uncharacterized transporter C5D6.04-like isoform X2 [Nicotiana sylvestris]	NA	NA	6.02	Membrane transport protein	Membrane transport protein	NA	NA	integral component of membrane | transmembrane transport	K24139	PILS, ECM3; auxin efflux carrier family protein	A09180 Brite Hierarchies	09183 Protein families: signaling and cellular processes	02000 Transporters [BR:ko02000]			NA
15033	LG1	3561352	3569302	g627	PREDICTED: uncharacterized protein LOC104097478 [Nicotiana tomentosiformis]	NA	NA	6.02			NA	NA	NA	NA	NA	NA	NA	NA			AT1G03180.1 | Symbols: | unknown protein; Has 36 Blast hits to 36 proteins in 15 species: Archae - 0; Bacteria - 0; Metazoa - 3; Fungi - 0; Plants - 33; Viruses - 0; Other Eukaryotes - 0 (source: NCBI BLink).
15045	LG1	3582604	3583037	g628	LG1 AUGUSTUS gene 3582604 3583037 0.12 - .	NA	NA	6.02			NA	NA	NA	NA	NA	NA	NA	NA			NA
15053	LG1	3598403	3600097	g629	PREDICTED: homeobox-leucine zipper protein ATHB-6-like [Nicotiana tomentosiformis]	NA	NA	6.02	Homeobox associated leucine zipper; Homeodomain	Leucine zipper, homeobox-associated; Homeobox domain	NA	NA	regulation of transcription, DNA-templated | sequence-specific DNA binding	K09338	HD-ZIP; homeobox-leucine zipper protein	A09180 Brite Hierarchies	09182 Protein families: genetic information processing	03000 Transcription factors [BR:ko03000]			AT4G40060.1 | Symbols: ATHB16, ATHB-16, HB16 | homeobox protein 16
15070	LG1	3604942	3611117	g630	PREDICTED: bifunctional riboflavin biosynthesis protein RIBA 1, chloroplastic-like isoform X1 [Nicotiana tomentosiformis]	NA	NA	6.02	3,4-dihydroxy-2-butanone 4-phosphate synthase	3,4-dihydroxy-2-butanone 4-phosphate synthase, RibB	NA	NA	3,4-dihydroxy-2-butanone-4-phosphate synthase activity | riboflavin biosynthetic process	K14652	ribBA; 3,4-dihydroxy 2-butanone 4-phosphate synthase / GTP cyclohydrolase II [EC:4.1.99.12 3.5.4.25]	A09100 Metabolism	09108 Metabolism of cofactors and vitamins	00740 Riboflavin metabolism [PATH:ko00740]			AT5G64300.1 | Symbols: ATGCH, GCH, ATRIBA1, RFD1 | GTP cyclohydrolase II
15097	LG1	3612212	3618680	g631	PREDICTED: putative uncharacterized protein At4g01020, chloroplastic [Nicotiana tomentosiformis]	NA	NA	6.02	DEAD/DEAH box helicase; Helicase associated domain (HA2)	DEAD/DEAH box helicase domain; Helicase-associated domain	helicase activity	NA	nucleic acid binding | ATP binding	NA	NA	NA	NA	NA			AT5G10370.1 | Symbols: | helicase domain-containing protein / IBR domain-containing protein / zinc finger protein-related
15123	LG1	3620567	3622227	g632	PREDICTED: uncharacterized protein LOC104237325 [Nicotiana sylvestris]	NA	NA	6.02			NA	NA	NA	NA	NA	NA	NA	NA			NA
15140	LG1	3626308	3627987	g633	PREDICTED: transcription factor bHLH96-like [Nicotiana sylvestris]	NA	NA	6.02	Helix-loop-helix DNA-binding domain	Myc-type, basic helix-loop-helix (bHLH) domain	NA	NA	protein dimerization activity	NA	NA	NA	NA	NA			AT1G72210.1 | Symbols: | basic helix-loop-helix (bHLH) DNA-binding superfamily protein
15154	LG1	3636962	3638360	g634	PREDICTED: putative clathrin assembly protein At4g40080 isoform X1 [Nicotiana tomentosiformis]	NA	NA	6.02	ANTH domain	AP180 N-terminal homology (ANTH) domain	NA	NA	phospholipid binding	NA	NA	NA	NA	NA			AT4G40080.1 | Symbols: | ENTH/ANTH/VHS superfamily protein
15162	LG1	3640020	3645377	g635	LG1 AUGUSTUS gene 3640020 3645377 0.1 - .	NA	NA	6.02,5.89			NA	NA	NA	NA	NA	NA	NA	NA			NA
15171	LG1	3649434	3655927	g636	PREDICTED: uncharacterized protein LOC105167219 [Sesamum indicum]	NA	NA	6.02,5.89	Reverse transcriptase-like	Ribonuclease H domain	NA	NA	nucleic acid binding | RNA-DNA hybrid ribonuclease activity	NA	NA	NA	NA	NA			AT2G01050.1 | Symbols: | zinc ion binding;nucleic acid binding
15224	LG1	3684742	3686612	g637	PREDICTED: homeobox-leucine zipper protein ATHB-6-like [Nicotiana tomentosiformis]	NA	NA	6.02,5.89	Homeodomain; Homeobox associated leucine zipper	Homeobox domain; Leucine zipper, homeobox-associated	NA	NA	DNA binding	K09338	HD-ZIP; homeobox-leucine zipper protein	A09180 Brite Hierarchies	09182 Protein families: genetic information processing	03000 Transcription factors [BR:ko03000]			AT2G22430.1 | Symbols: ATHB6, HB6 | homeobox protein 6
15241	LG1	3713726	3720537	g638	putative polyprotein [Solanum lycopersicum]	NA	NA	6.02,5.89	Integrase core domain	Integrase, catalytic core	DNA integration	NA	DNA integration	NA	NA	NA	NA	NA			AT4G23160.1 | Symbols: CRK8 | cysteine-rich RLK (RECEPTOR-like protein kinase) 8
15270	LG1	3727032	3732733	g639	PREDICTED: uncharacterized transporter C5D6.04-like isoform X2 [Nicotiana sylvestris]	NA	NA	6.02,5.89	Membrane transport protein	Membrane transport protein	NA	NA	integral component of membrane | transmembrane transport	NA	NA	NA	NA	NA			AT5G65980.1 | Symbols: | Auxin efflux carrier family protein
15300	LG1	3733361	3743007	g640	PREDICTED: exosome complex exonuclease RRP44 [Nicotiana sylvestris]	NA	NA	6.02,5.89	RNB domain	Ribonuclease II/R	NA	NA	RNA binding | ribonuclease activity	K12585	DIS3, RRP44; exosome complex exonuclease DIS3/RRP44 [EC:3.1.13.-]	A09120 Genetic Information Processing	09123 Folding, sorting and degradation	03018 RNA degradation [PATH:ko03018]			AT2G17510.1 | Symbols: EMB2763 | ribonuclease II family protein
15383	LG1	3743910	3748077	g641	PREDICTED: glutamate receptor 3.6-like [Nicotiana tomentosiformis]	NA	NA	5.89	Ligand-gated ion channel	Ionotropic glutamate receptor	NA	NA	ligand-gated ion channel activity | membrane	K05313	GRIN; glutamate receptor, ionotropic, invertebrate	A09180 Brite Hierarchies	09183 Protein families: signaling and cellular processes	04040 Ion channels [BR:ko04040]			AT3G51480.1 | Symbols: ATGLR3.6, GLR3.6 | glutamate receptor 3.6
15418	LG1	3752062	3755410	g642	PREDICTED: probable protein phosphatase 2C 47-like isoform X1 [Solanum tuberosum]	NA	NA	5.89	Protein phosphatase 2C	PPM-type phosphatase domain	NA	NA	phosphatase activity	K14803	PTC2_3; protein phosphatase PTC2/3 [EC:3.1.3.16]	A09180 Brite Hierarchies	09181 Protein families: metabolism	01009 Protein phosphatases and associated proteins [BR:ko01009]			AT3G51470.1 | Symbols: | Protein phosphatase 2C family protein
15436	LG1	3755711	3756357	g643	PREDICTED: RNA-binding protein 12-like [Nicotiana tomentosiformis]	NA	NA	5.89			NA	NA	NA	NA	NA	NA	NA	NA			NA
15444	LG1	3757272	3759103	g644	PREDICTED: proton-coupled amino acid transporter 3-like [Nicotiana sylvestris]	NA	NA	5.89			NA	NA	NA	K14209	SLC36A, PAT; solute carrier family 36 (proton-coupled amino acid transporter)	A09140 Cellular Processes	09141 Transport and catabolism	04138 Autophagy - yeast [PATH:ko04138]			AT4G38250.1 | Symbols: | Transmembrane amino acid transporter family protein
15452	LG1	3759422	3768727	g645	PREDICTED: epidermal growth factor receptor substrate 15-like 1 isoform X2 [Nicotiana sylvestris]	NA	NA	5.89	EF hand	EF-hand domain	NA	NA	calcium ion binding	K12472	EPS15; epidermal growth factor receptor substrate 15	A09140 Cellular Processes	09141 Transport and catabolism	04144 Endocytosis [PATH:ko04144]			AT1G21630.1 | Symbols: | Calcium-binding EF hand family protein
15499	LG1	3773732	3781822	g646	PREDICTED: SRSF protein kinase 1 [Nicotiana tomentosiformis]	NA	NA	5.89	Protein kinase domain; Ketopantoate hydroxymethyltransferase	Protein kinase domain; Ketopantoate hydroxymethyltransferase	NA	NA	protein kinase activity | ATP binding | protein phosphorylation	K00606	panB; 3-methyl-2-oxobutanoate hydroxymethyltransferase [EC:2.1.2.11]	A09100 Metabolism	09108 Metabolism of cofactors and vitamins	00770 Pantothenate and CoA biosynthesis [PATH:ko00770]			NA
15540	LG1	3782660	3787577	g647	PREDICTED: WUSCHEL-related homeobox 8 [Nicotiana tomentosiformis]	NA	NA	5.89	Homeodomain	Homeobox domain	NA	NA	DNA binding	NA	NA	NA	NA	NA			AT4G35550.1 | Symbols: HB-4, WOX13, ATWOX13 | WUSCHEL related homeobox 13
15560	LG1	3791122	3796560	g648	PREDICTED: ubiquitin carboxyl-terminal hydrolase 3 [Nicotiana sylvestris]	NA	NA	5.89	Ubiquitin carboxyl-terminal hydrolase	Peptidase C19, ubiquitin carboxyl-terminal hydrolase	cysteine-type peptidase activity	NA	thiol-dependent ubiquitin-specific protease activity | protein deubiquitination	K11842	USP12_46; ubiquitin carboxyl-terminal hydrolase 12/46 [EC:3.4.19.12]	A09180 Brite Hierarchies	09181 Protein families: metabolism	01002 Peptidases and inhibitors [BR:ko01002]			AT2G22310.2 | Symbols: UBP4 | ubiquitin-specific protease 4
15589	LG1	3797197	3806197	g649	PREDICTED: calmodulin-binding transcription activator 3 isoform X2 [Nicotiana tomentosiformis]	NA	NA	5.89	CG-1 domain; IQ calmodulin-binding motif	CG-1 DNA-binding domain; IQ motif, EF-hand binding site	NA	NA	DNA binding	K21596	CAMTA; calmodulin-binding transcription activator	A09180 Brite Hierarchies	09182 Protein families: genetic information processing	03000 Transcription factors [BR:ko03000]			AT2G22300.2 | Symbols: CAMTA3, SR1 | signal responsive 1
15633	LG1	3810002	3817258	g650	PREDICTED: cyclin-dependent kinase C-1-like [Nicotiana tomentosiformis]	NA	NA	5.89	Protein kinase domain	Protein kinase domain	NA	NA	protein kinase activity | ATP binding | protein phosphorylation	K08819	CDK12_13; cyclin-dependent kinase 12/13 [EC:2.7.11.22 2.7.11.23]	A09180 Brite Hierarchies	09181 Protein families: metabolism	01001 Protein kinases [BR:ko01001]			AT5G10270.1 | Symbols: CDKC;1 | cyclin-dependent kinase C;1
15676	LG1	3817352	3819042	g651	PREDICTED: uncharacterized protein LOC104119881 isoform X1 [Nicotiana tomentosiformis]	NA	NA	5.89			NA	NA	NA	NA	NA	NA	NA	NA			AT4G39900.1 | Symbols: | unknown protein; Has 30201 Blast hits to 17322 proteins in 780 species: Archae - 12; Bacteria - 1396; Metazoa - 17338; Fungi - 3422; Plants - 5037; Viruses - 0; Other Eukaryotes - 2996 (source: NCBI BLink).
15693	LG1	3819646	3823447	g652	PREDICTED: ras-related protein RABH1e [Sesamum indicum]	NA	NA	5.89	Ras family	Small GTPase	NA	NA	GTPase activity | GTP binding	K07893	RAB6A; Ras-related protein Rab-6A	A09180 Brite Hierarchies	09182 Protein families: genetic information processing	04131 Membrane trafficking [BR:ko04131]			AT5G10260.1 | Symbols: AtRABH1e, RABH1e | RAB GTPase homolog H1E
15716	LG1	3825012	3832128	g653	PREDICTED: putative BTB/POZ domain-containing protein DOT3 [Nicotiana tomentosiformis]	NA	NA	5.89	Cytochrome P450	Cytochrome P450	NA	NA	iron ion binding | oxidoreductase activity, acting on paired donors, with incorporation or reduction of molecular oxygen | heme binding | oxidation-reduction process	NA	NA	NA	NA	NA			AT5G10250.1 | Symbols: DOT3 | Phototropic-responsive NPH3 family protein
15745	LG1	3833130	3833557	g654	LG1 AUGUSTUS gene 3833130 3833557 0.43 - .	NA	NA	5.89	Reverse transcriptase-like	Ribonuclease H domain	NA	NA	nucleic acid binding | RNA-DNA hybrid ribonuclease activity	NA	NA	NA	NA	NA			NA
15753	LG1	3834683	3836457	g655	PREDICTED: cell wall integrity and stress response component 4-like [Solanum tuberosum]	NA	NA	5.89			NA	NA	NA	NA	NA	NA	NA	NA			AT4G39840.1 | Symbols: | unknown protein; FUNCTIONS IN: molecular_function unknown; INVOLVED IN: biological_process unknown; LOCATED IN: endomembrane system; EXPRESSED IN: 23 plant structures; EXPRESSED DURING: 13 growth stages; Has 20719 Blast hits to 6096 proteins in 607 species: Archae - 22; Bacteria - 3243; Metazoa - 4364; Fungi - 2270; Plants - 237; Viruses - 128; Other Eukaryotes - 10455 (s…
31828	LG1	8437445	8439797	g1394	PREDICTED: cytokinin hydroxylase [Sesamum indicum]	NA	NA	6.19	Cytochrome P450	Cytochrome P450	NA	NA	iron ion binding | oxidoreductase activity, acting on paired donors, with incorporation or reduction of molecular oxygen | heme binding | oxidation-reduction process	NA	NA	NA	NA	NA			AT5G38450.1 | Symbols: CYP735A1 | cytochrome P450, family 735, subfamily A, polypeptide 1
31842	LG1	8441575	8442888	g1395	PREDICTED: cytokinin hydroxylase-like [Nicotiana tomentosiformis]	NA	NA	6.19	Cytochrome P450	Cytochrome P450	NA	NA	iron ion binding | oxidoreductase activity, acting on paired donors, with incorporation or reduction of molecular oxygen | heme binding | oxidation-reduction process	NA	NA	NA	NA	NA			AT1G67110.1 | Symbols: CYP735A2 | cytochrome P450, family 735, subfamily A, polypeptide 2
31851	LG1	8473095	8475338	g1396	PREDICTED: mortality factor 4-like protein 1 [Sesamum indicum]	NA	NA	6.19			NA	NA	NA	NA	NA	NA	NA	NA			NA
31871	LG1	8477985	8478830	g1397	LG1 AUGUSTUS gene 8477985 8478830 0.02 - .	NA	NA	6.19			NA	NA	NA	NA	NA	NA	NA	NA			NA
31879	LG1	8494464	8496120	g1398	PREDICTED: LOB domain-containing protein 41 [Sesamum indicum]	NA	NA	6.19			NA	NA	NA	NA	NA	NA	NA	NA			AT3G02550.1 | Symbols: LBD41 | LOB domain-containing protein 41
31890	LG1	8496775	8498269	g1399	PREDICTED: NADP-dependent malic enzyme, chloroplastic-like [Nicotiana sylvestris]	NA	NA	6.19			NA	NA	NA	NA	NA	NA	NA	NA			NA
31901	LG1	8508157	8511710	g1400	PREDICTED: transcription initiation factor TFIID subunit 5-like [Solanum tuberosum]	NA	NA	6.19	WD domain, G-beta repeat	WD40 repeat	NA	NA	protein binding	NA	NA	NA	NA	NA			AT5G25150.1 | Symbols: TAF5 | TBP-associated factor 5
31922	LG1	8513447	8515960	g1401	PREDICTED: cytochrome P450 CYP736A12-like [Nicotiana tomentosiformis]	NA	NA	6.19	Cytochrome P450	Cytochrome P450	NA	NA	iron ion binding | oxidoreductase activity, acting on paired donors, with incorporation or reduction of molecular oxygen | heme binding | oxidation-reduction process	NA	NA	NA	NA	NA			AT4G36220.1 | Symbols: FAH1, CYP84A1 | ferulic acid 5-hydroxylase 1
31933	LG1	8529126	8530480	g1402	PREDICTED: cytochrome P450 CYP736A12-like [Nicotiana tomentosiformis]	NA	NA	6.19	Cytochrome P450	Cytochrome P450	NA	NA	iron ion binding | oxidoreductase activity, acting on paired donors, with incorporation or reduction of molecular oxygen | heme binding | oxidation-reduction process	NA	NA	NA	NA	NA			AT4G36220.1 | Symbols: FAH1, CYP84A1 | ferulic acid 5-hydroxylase 1
31942	LG1	8530825	8532936	g1403	LG1 AUGUSTUS gene 8530825 8532936 0.06 + .	NA	NA	6.19			NA	NA	NA	NA	NA	NA	NA	NA			NA
31956	LG1	8533365	8540710	g1404	PREDICTED: uncharacterized protein LOC104111372 [Nicotiana tomentosiformis]	NA	NA	6.19			NA	NA	NA	NA	NA	NA	NA	NA			ATMG00860.1 | Symbols: ORF158 | DNA/RNA polymerases superfamily protein
32003	LG1	8541795	8543118	g1405	LG1 AUGUSTUS gene 8541795 8543118 0.1 + .	NA	NA	6.19			NA	NA	NA	NA	NA	NA	NA	NA			NA
32017	LG1	8547845	8553735	g1406	RecName: Full=Glycine-rich protein 2	NA	NA	6.19			NA	NA	NA	NA	NA	NA	NA	NA			NA
32029	LG1	8567311	8568160	g1407	PREDICTED: cytochrome P450 CYP736A12-like [Nicotiana tomentosiformis]	NA	NA	6.19	Cytochrome P450	Cytochrome P450	NA	NA	iron ion binding | oxidoreductase activity, acting on paired donors, with incorporation or reduction of molecular oxygen | heme binding | oxidation-reduction process	NA	NA	NA	NA	NA			AT2G45570.1 | Symbols: CYP76C2 | cytochrome P450, family 76, subfamily C, polypeptide 2
32037	LG1	8569723	8577150	g1408	Polyprotein, putative [Solanum demissum]	NA	NA	6.19	Cytochrome P450	Cytochrome P450	NA	NA	iron ion binding | oxidoreductase activity, acting on paired donors, with incorporation or reduction of molecular oxygen | heme binding | oxidation-reduction process	NA	NA	NA	NA	NA			AT4G23160.1 | Symbols: CRK8 | cysteine-rich RLK (RECEPTOR-like protein kinase) 8
32072	LG1	8580265	8588280	g1409	PREDICTED: uncharacterized protein LOC105172963 isoform X1 [Sesamum indicum]	NA	NA	6.19	Glycosyl hydrolase family 10	Glycoside hydrolase family 10 domain	NA	NA	hydrolase activity, hydrolyzing O-glycosyl compounds | carbohydrate metabolic process	NA	NA	NA	NA	NA			AT4G38650.1 | Symbols: | Glycosyl hydrolase family 10 protein
32110	LG1	8591891	8596470	g1410	PREDICTED: uncharacterized protein LOC104244932 [Nicotiana sylvestris]	NA	NA	6.19			NA	NA	NA	NA	NA	NA	NA	NA			AT1G67060.1 | Symbols: | unknown protein; FUNCTIONS IN: molecular_function unknown; INVOLVED IN: biological_process unknown; LOCATED IN: plasma membrane; EXPRESSED IN: 22 plant structures; EXPRESSED DURING: 13 growth stages; Has 283 Blast hits to 281 proteins in 136 species: Archae - 0; Bacteria - 145; Metazoa - 0; Fungi - 65; Plants - 41; Viruses - 0; Other Eukaryotes - 32 (source: NCBI BLink).
32140	LG1	8597345	8600032	g1411	PREDICTED: uncharacterized protein LOC104104987 [Nicotiana tomentosiformis]	NA	NA	6.19			NA	NA	NA	NA	NA	NA	NA	NA			NA
32155	LG1	8612226	8613408	g1412	PREDICTED: formin-like protein 6 [Sesamum indicum]	NA	NA	6.19			NA	NA	NA	NA	NA	NA	NA	NA			AT1G67050.1 | Symbols: | unknown protein; BEST Arabidopsis thaliana protein match is: unknown protein (TAIR:AT5G38320.1); Has 617 Blast hits to 318 proteins in 80 species: Archae - 0; Bacteria - 16; Metazoa - 141; Fungi - 62; Plants - 128; Viruses - 2; Other Eukaryotes - 268 (source: NCBI BLink).
32163	LG1	8619106	8622213	g1413	PREDICTED: uncharacterized protein LOC104226450 [Nicotiana sylvestris]	NA	NA	6.19			NA	NA	NA	NA	NA	NA	NA	NA			AT2G44260.1 | Symbols: | Plant protein of unknown function (DUF946)
32177	LG1	8624506	8628741	g1414	PREDICTED: uncharacterized protein LOC101265984 [Solanum lycopersicum]	NA	NA	6.19			NA	NA	NA	NA	NA	NA	NA	NA			AT1G67040.1 | Symbols: | unknown protein; FUNCTIONS IN: molecular_function unknown; INVOLVED IN: biological_process unknown; LOCATED IN: cellular_component unknown; EXPRESSED IN: 20 plant structures; EXPRESSED DURING: 11 growth stages; BEST Arabidopsis thaliana protein match is: unknown protein (TAIR:AT5G26910.3); Has 89 Blast hits to 84 proteins in 15 species: Archae - 0; Bacteria - 0; Metazoa -…
35181	LG1	9594696	9597863	g1554	LG1 AUGUSTUS gene 9594696 9597863 0.02 + .	1.52	NA	NA			NA	NA	NA	NA	NA	NA	NA	NA			NA
35190	LG1	9598622	9600921	g1555	PREDICTED: probable receptor-like protein kinase At1g67000 isoform X2 [Solanum lycopersicum]	1.52	NA	NA	Protein kinase domain; Wall-associated receptor kinase galacturonan-binding	Protein kinase domain; Wall-associated receptor kinase, galacturonan-binding domain	polysaccharide binding	NA	protein kinase activity | ATP binding | protein phosphorylation	NA	NA	NA	NA	NA			AT1G66920.1 | Symbols: | Protein kinase superfamily protein
35201	LG1	9606705	9612071	g1556	PREDICTED: uncharacterized protein LOC104239924 [Nicotiana sylvestris]	1.52	NA	NA	Reverse transcriptase-like	Ribonuclease H domain	NA	NA	nucleic acid binding | RNA-DNA hybrid ribonuclease activity	NA	NA	NA	NA	NA			AT2G01050.1 | Symbols: | zinc ion binding;nucleic acid binding
35236	LG1	9612176	9613636	g1557	PREDICTED: cysteine-rich receptor-like protein kinase 41-like, partial [Solanum tuberosum]	1.52	NA	NA	Protein tyrosine and serine/threonine kinase	Serine-threonine/tyrosine-protein kinase, catalytic domain	NA	NA	protein kinase activity | protein phosphorylation	NA	NA	NA	NA	NA			AT5G38280.1 | Symbols: PR5K | PR5-like receptor kinase
35250	LG1	9616566	9619035	g1558	PREDICTED: probable receptor-like protein kinase At1g67000 [Nicotiana tomentosiformis]	1.52	NA	NA	Protein tyrosine and serine/threonine kinase	Serine-threonine/tyrosine-protein kinase, catalytic domain	NA	NA	protein kinase activity | protein phosphorylation	NA	NA	NA	NA	NA			AT5G38280.1 | Symbols: PR5K | PR5-like receptor kinase
35270	LG1	9621546	9625102	g1559	PREDICTED: probable receptor-like protein kinase At1g67000 isoform X2 [Nicotiana sylvestris]	1.52	NA	NA	Protein tyrosine and serine/threonine kinase; Protein kinase domain	Serine-threonine/tyrosine-protein kinase, catalytic domain; Protein kinase domain	NA	NA	protein kinase activity | protein phosphorylation	NA	NA	NA	NA	NA			AT1G70250.1 | Symbols: | receptor serine/threonine kinase, putative
35297	LG1	9625696	9628359	g1560	PREDICTED: probable receptor-like protein kinase At1g67000 isoform X1 [Nicotiana sylvestris]	1.52	NA	NA	Wall-associated receptor kinase galacturonan-binding; Protein kinase domain	Wall-associated receptor kinase, galacturonan-binding domain; Protein kinase domain	polysaccharide binding	NA	polysaccharide binding	NA	NA	NA	NA	NA			AT5G38260.1 | Symbols: | Protein kinase superfamily protein
35314	LG1	9631169	9633005	g1561	PREDICTED: probable receptor-like protein kinase At1g67000 isoform X1 [Nicotiana sylvestris]	1.52	NA	NA	Protein tyrosine and serine/threonine kinase; Protein kinase domain	Serine-threonine/tyrosine-protein kinase, catalytic domain; Protein kinase domain	NA	NA	protein kinase activity | protein phosphorylation	NA	NA	NA	NA	NA			AT5G38280.1 | Symbols: PR5K | PR5-like receptor kinase
35326	LG1	9633210	9638312	g1562	PREDICTED: uncharacterized protein LOC105180271 [Sesamum indicum]	1.52	NA	NA			NA	NA	NA	NA	NA	NA	NA	NA			AT3G24255.1 | Symbols: | RNA-directed DNA polymerase (reverse transcriptase)-related family protein
35347	LG1	9638630	9641544	g1563	PREDICTED: G-type lectin S-receptor-like serine/threonine-protein kinase At1g34300-like [Solanum tuberosum]	1.52	NA	NA	Protein tyrosine and serine/threonine kinase; Wall-associated receptor kinase galacturonan-binding	Serine-threonine/tyrosine-protein kinase, catalytic domain; Wall-associated receptor kinase, galacturonan-binding domain	polysaccharide binding	NA	protein kinase activity | protein phosphorylation	NA	NA	NA	NA	NA			AT1G66910.1 | Symbols: | Protein kinase superfamily protein
35364	LG1	9644180	9646475	g1564	PREDICTED: probable receptor-like protein kinase At1g67000 isoform X2 [Solanum lycopersicum]	1.52	NA	NA	Protein kinase domain; Protein tyrosine and serine/threonine kinase; Wall-associated receptor kinase galacturonan-binding	Protein kinase domain; Serine-threonine/tyrosine-protein kinase, catalytic domain; Wall-associated receptor kinase, galacturonan-binding domain	polysaccharide binding	NA	protein kinase activity | ATP binding | protein phosphorylation	NA	NA	NA	NA	NA			AT1G67000.1 | Symbols: | Protein kinase superfamily protein
35381	LG1	9648070	9650681	g1565	PREDICTED: probable receptor-like protein kinase At1g67000 [Nicotiana tomentosiformis]	1.52	NA	NA	Protein kinase domain; Wall-associated receptor kinase galacturonan-binding	Protein kinase domain; Wall-associated receptor kinase, galacturonan-binding domain	polysaccharide binding	NA	protein kinase activity | ATP binding | protein phosphorylation	NA	NA	NA	NA	NA			AT1G70250.1 | Symbols: | receptor serine/threonine kinase, putative
35401	LG1	9652700	9655313	g1566	PREDICTED: probable receptor-like protein kinase At1g67000 isoform X1 [Nicotiana sylvestris]	1.52	NA	NA	Protein kinase domain; Wall-associated receptor kinase galacturonan-binding	Protein kinase domain; Wall-associated receptor kinase, galacturonan-binding domain	polysaccharide binding	NA	protein kinase activity | ATP binding | protein phosphorylation	NA	NA	NA	NA	NA			AT5G38260.1 | Symbols: | Protein kinase superfamily protein
35418	LG1	9657482	9660015	g1567	PREDICTED: probable receptor-like protein kinase At1g67000-like [Solanum tuberosum]	1.52	NA	NA	Wall-associated receptor kinase galacturonan-binding; Protein kinase domain	Wall-associated receptor kinase, galacturonan-binding domain; Protein kinase domain	polysaccharide binding	NA	polysaccharide binding	NA	NA	NA	NA	NA			AT1G67000.1 | Symbols: | Protein kinase superfamily protein
35435	LG1	9661090	9663542	g1568	RecName: Full=Retrovirus-related Pol polyprotein from transposon TNT 1-94; Includes: RecName: Full=Protease; Includes: RecName: Full=Reverse transcriptase; Includes: RecName: Full=Endonuclease	1.52	NA	NA			NA	NA	NA	NA	NA	NA	NA	NA			AT4G23160.1 | Symbols: CRK8 | cysteine-rich RLK (RECEPTOR-like protein kinase) 8
35455	LG1	9664710	9671179	g1569	PREDICTED: growth-regulating factor 1-like [Nicotiana sylvestris]	1.52	NA	NA	QLQ	Glutamine-Leucine-Glutamine, QLQ	NA	NA	ATP binding | nucleus | regulation of transcription, DNA-templated	NA	NA	NA	NA	NA			AT3G13960.1 | Symbols: AtGRF5, GRF5 | growth-regulating factor 5
35485	LG1	9672797	9674275	g1570	LG1 AUGUSTUS gene 9672797 9674275 0.04 - .	1.52	NA	NA			NA	NA	NA	NA	NA	NA	NA	NA			NA
35496	LG1	9679440	9680245	g1571	PREDICTED: structural maintenance of chromosomes protein 6B isoform X1 [Sesamum indicum]	1.52	NA	NA			NA	NA	NA	NA	NA	NA	NA	NA			NA
36036	LG1	9873211	9875550	g1593	LG1 AUGUSTUS gene 9873211 9875550 0.01 + .	NA	0.27	NA			NA	NA	NA	NA	NA	NA	NA	NA			NA
36059	LG1	9876336	9876976	g1594	LG1 AUGUSTUS gene 9876336 9876976 0.08 - .	NA	0.27	NA			NA	NA	NA	NA	NA	NA	NA	NA			NA
36067	LG1	9878181	9879366	g1595	PREDICTED: uncharacterized protein LOC102597917 [Solanum tuberosum]	NA	0.27	NA			NA	NA	NA	NA	NA	NA	NA	NA			NA
36081	LG1	9879551	9880254	g1596	LG1 AUGUSTUS gene 9879551 9880254 0.16 + .	NA	0.27	NA			NA	NA	NA	NA	NA	NA	NA	NA			NA
36089	LG1	9881171	9885528	g1597	LG1 AUGUSTUS gene 9881171 9885528 0.01 + .	NA	0.27	NA			NA	NA	NA	NA	NA	NA	NA	NA			NA
36122	LG1	9895441	9896515	g1598	LG1 AUGUSTUS gene 9895441 9896515 0.01 + .	NA	0.27	NA			NA	NA	NA	NA	NA	NA	NA	NA			NA
36133	LG1	9897151	9900201	g1599	LG1 AUGUSTUS gene 9897151 9900201 0.02 + .	NA	0.27	NA			NA	NA	NA	NA	NA	NA	NA	NA			NA
36142	LG1	9902211	9911099	g1600	PREDICTED: BTB/POZ domain-containing protein At1g04390 isoform X1 [Nicotiana tomentosiformis]	NA	0.27	NA	BTB/POZ domain	BTB/POZ domain	NA	NA	protein binding	NA	NA	NA	NA	NA			AT1G04390.1 | Symbols: | BTB/POZ domain-containing protein
36179	LG1	9916727	9917466	g1601	PREDICTED: 21 kDa protein-like isoform X2 [Solanum tuberosum]	NA	0.27	NA	Plant invertase/pectin methylesterase inhibitor	Pectinesterase inhibitor domain	enzyme regulator activity	NA	enzyme inhibitor activity	NA	NA	NA	NA	NA			AT5G62360.1 | Symbols: | Plant invertase/pectin methylesterase inhibitor superfamily protein
36187	LG1	9933495	9945526	g1602	PREDICTED: pentatricopeptide repeat-containing protein At4g25270, chloroplastic [Sesamum indicum]	NA	0.27	NA			NA	NA	NA	NA	NA	NA	NA	NA			AT4G25270.1 | Symbols: | Tetratricopeptide repeat (TPR)-like superfamily protein
36226	LG1	9946261	9948586	g1603	LG1 AUGUSTUS gene 9946261 9948586 0.23 + .	NA	0.27	NA			NA	NA	NA	NA	NA	NA	NA	NA			NA
36246	LG1	9964751	9965504	g1604	LG1 AUGUSTUS gene 9964751 9965504 0.29 + .	NA	0.27	NA			NA	NA	NA	NA	NA	NA	NA	NA			NA
37492	LG1	10523038	10526076	g1666	PREDICTED: transcription factor GTE7-like [Nicotiana sylvestris]	NA	NA	4.59	Bromodomain	Bromodomain	NA	NA	protein binding	NA	NA	NA	NA	NA			AT5G10550.1 | Symbols: GTE2 | global transcription factor group E2
37506	LG1	10534118	10537980	g1667	PREDICTED: ABC transporter G family member 16-like [Solanum tuberosum]	NA	NA	4.59	ABC-2 type transporter; ABC transporter	ABC-2 type transporter; ABC transporter-like	NA	NA	membrane	NA	NA	NA	NA	NA			AT3G55100.1 | Symbols: | ABC-2 type transporter family protein
37523	LG1	10545838	10550023	g1668	PREDICTED: nodulation receptor kinase-like isoform X1 [Nicotiana tomentosiformis]	NA	NA	4.59	Protein kinase domain	Protein kinase domain	NA	NA	protein kinase activity | ATP binding | protein phosphorylation	NA	NA	NA	NA	NA			AT1G51870.1 | Symbols: | protein kinase family protein
37561	LG1	10553904	10554743	g1669	PREDICTED: MADS-box transcription factor 23-like isoform X1 [Nicotiana sylvestris]	NA	NA	4.59	K-box region	Transcription factor, K-box	NA	NA	DNA-binding transcription factor activity | nucleus | regulation of transcription, DNA-templated	NA	NA	NA	NA	NA			AT2G22630.1 | Symbols: AGL17 | AGAMOUS-like 17
37578	LG1	10557784	10558283	g1670	PREDICTED: MADS-box transcription factor 27-like [Solanum tuberosum]	NA	NA	4.59	SRF-type transcription factor (DNA-binding and dimerisation domain)	Transcription factor, MADS-box	NA	NA	DNA binding | protein dimerization activity	NA	NA	NA	NA	NA			AT2G14210.1 | Symbols: ANR1, AGL44 | AGAMOUS-like 44
37586	LG1	10565383	10567983	g1671	PREDICTED: peptidyl-prolyl cis-trans isomerase FKBP65-like [Solanum tuberosum]	NA	NA	4.59			NA	NA	NA	NA	NA	NA	NA	NA			NA
37597	LG1	10568188	10571552	g1672	PREDICTED: aldehyde dehydrogenase family 2 member C4 [Sesamum indicum]	NA	NA	4.59	Aldehyde dehydrogenase family	Aldehyde dehydrogenase domain	NA	NA	oxidoreductase activity | oxidation-reduction process	NA	NA	NA	NA	NA			AT1G23800.1 | Symbols: ALDH2B7, ALDH2B | aldehyde dehydrogenase 2B7
37629	LG1	10571938	10572683	g1673	GNOM-like 2 [Nicotiana tabacum]	NA	NA	4.59			NA	NA	NA	NA	NA	NA	NA	NA			AT5G19610.1 | Symbols: GNL2 | GNOM-like 2
37637	LG1	10573194	10573773	g1674	PREDICTED: ARF guanine-nucleotide exchange factor GNL2 [Sesamum indicum]	NA	NA	4.59			NA	NA	NA	NA	NA	NA	NA	NA			NA
37645	LG1	10574558	10575458	g1675	PREDICTED: ARF guanine-nucleotide exchange factor GNL2-like [Solanum tuberosum]	NA	NA	4.59	Sec7 domain	Sec7 domain	NA	NA	ARF guanyl-nucleotide exchange factor activity | regulation of ARF protein signal transduction	NA	NA	NA	NA	NA			AT5G19610.1 | Symbols: GNL2 | GNOM-like 2
37659	LG1	10575718	10577281	g1676	PREDICTED: ARF guanine-nucleotide exchange factor GNL2 [Nicotiana tomentosiformis]	NA	NA	4.59			NA	NA	NA	NA	NA	NA	NA	NA			AT5G19610.1 | Symbols: GNL2 | GNOM-like 2
37673	LG1	10587328	10595410	g1677	PREDICTED: uncharacterized protein LOC104249167 [Nicotiana sylvestris]	NA	NA	4.59	Pectinacetylesterase	Pectinacetylesterase/NOTUM	NA	NA	hydrolase activity	NA	NA	NA	NA	NA			AT5G45280.2 | Symbols: | Pectinacetylesterase family protein
37730	LG1	10602328	10604858	g1678	PREDICTED: uncharacterized protein LOC101248898 [Solanum lycopersicum]	NA	NA	4.59	Pectinacetylesterase	Pectinacetylesterase/NOTUM	NA	NA	hydrolase activity	NA	NA	NA	NA	NA			AT4G19410.2 | Symbols: | Pectinacetylesterase family protein
37757	LG1	10633038	10637235	g1679	PREDICTED: uncharacterized protein LOC104087209 isoform X1 [Nicotiana tomentosiformis]	NA	NA	4.59	Pectinacetylesterase	Pectinacetylesterase/NOTUM	NA	NA	hydrolase activity	NA	NA	NA	NA	NA			AT5G45280.2 | Symbols: | Pectinacetylesterase family protein
37796	LG1	10652996	10654533	g1680	LG1 AUGUSTUS gene 10652996 10654533 0.03 - .	NA	NA	4.59			NA	NA	NA	NA	NA	NA	NA	NA			NA
37807	LG1	10655988	10660964	g1681	PREDICTED: uncharacterized protein LOC104100211 [Nicotiana tomentosiformis]	NA	NA	4.59	SWIM zinc finger	Zinc finger, SWIM-type	NA	NA	zinc ion binding	NA	NA	NA	NA	NA			AT5G17690.1 | Symbols: TFL2, LHP1 | like heterochromatin protein (LHP1)
37839	LG1	10661268	10663166	g1682	LG1 AUGUSTUS gene 10661268 10663166 0.06 + .	NA	NA	4.59			NA	NA	NA	NA	NA	NA	NA	NA			NA
37854	LG1	10663314	10664353	g1683	LG1 AUGUSTUS gene 10663314 10664353 0.18 - .	NA	NA	4.59			NA	NA	NA	NA	NA	NA	NA	NA			NA
37865	LG1	10665728	10667761	g1684	LG1 AUGUSTUS gene 10665728 10667761 0.15 + .	NA	NA	4.59			NA	NA	NA	NA	NA	NA	NA	NA			NA
37877	LG1	10670036	10672153	g1685	LG1 AUGUSTUS gene 10670036 10672153 0.01 - .	NA	NA	4.59			NA	NA	NA	NA	NA	NA	NA	NA			NA
37897	LG1	10675588	10676925	g1686	LG1 AUGUSTUS gene 10675588 10676925 0.08 + .	NA	NA	4.59			NA	NA	NA	NA	NA	NA	NA	NA			NA
37911	LG1	10681214	10682658	g1687	LG1 AUGUSTUS gene 10681214 10682658 0.39 + .	NA	NA	4.59			NA	NA	NA	NA	NA	NA	NA	NA			NA
37922	LG1	10685122	10689609	g1688	PREDICTED: uncharacterized protein LOC102585795 [Solanum tuberosum]	NA	NA	4.59			NA	NA	NA	NA	NA	NA	NA	NA			AT3G45900.1 | Symbols: | Ribonuclease P protein subunit P38-related
37934	LG1	10694564	10701508	g1689	PREDICTED: wall-associated receptor kinase-like 2 [Sesamum indicum]	NA	NA	4.59	Wall-associated receptor kinase galacturonan-binding; Protein kinase domain	Wall-associated receptor kinase, galacturonan-binding domain; Protein kinase domain	NA	NA	polysaccharide binding	NA	NA	NA	NA	NA			AT1G69730.1 | Symbols: | Wall-associated kinase family protein
37957	LG1	10701741	10706559	g1690	PREDICTED: wall-associated receptor kinase-like 1 [Solanum lycopersicum]	NA	NA	4.59			NA	NA	NA	NA	NA	NA	NA	NA			AT1G16110.1 | Symbols: WAKL6 | wall associated kinase-like 6
38562	LG1	10950021	10950623	g1727	LG1 AUGUSTUS gene 10950021 10950623 0.13 + .	NA	0.28	NA			NA	NA	NA	NA	NA	NA	NA	NA			NA
38573	LG1	10954601	10964590	g1728	LG1 AUGUSTUS gene 10954601 10964590 0.02 + .	NA	0.28	NA			NA	NA	NA	NA	NA	NA	NA	NA			NA
38600	LG1	10970671	10977377	g1729	PREDICTED: protein Simiate [Nicotiana sylvestris]	NA	0.28	NA			NA	NA	NA	NA	NA	NA	NA	NA			AT1G75980.1 | Symbols: | Single hybrid motif superfamily protein
38629	LG1	10989511	10993029	g1730	beta-1,3-glucanase 24 [Solanum tuberosum]	NA	0.28	NA			NA	NA	NA	NA	NA	NA	NA	NA			AT5G46890.1 | Symbols: | Bifunctional inhibitor/lipid-transfer protein/seed storage 2S albumin superfamily protein
38646	LG1	11002380	11008226	g1731	PREDICTED: urease accessory protein D isoform X1 [Nicotiana tomentosiformis]	NA	0.28	NA	UreD urease accessory protein	Urease accessory protein UreD	NA	NA	nitrogen compound metabolic process | nickel cation binding	NA	NA	NA	NA	NA			AT2G35035.1 | Symbols: URED | urease accessory protein D
39068	LG1	11181878	11182619	g1748	PREDICTED: 21 kDa protein-like isoform X2 [Solanum tuberosum]	NA	0.33	NA	Plant invertase/pectin methylesterase inhibitor	Pectinesterase inhibitor domain	enzyme regulator activity	NA	enzyme inhibitor activity	NA	NA	NA	NA	NA			AT5G62360.1 | Symbols: | Plant invertase/pectin methylesterase inhibitor superfamily protein
39076	LG1	11192370	11198877	g1749	PREDICTED: pentatricopeptide repeat-containing protein At4g25270, chloroplastic [Sesamum indicum]	NA	0.33,0.32	NA			NA	NA	NA	NA	NA	NA	NA	NA			AT4G25270.1 | Symbols: | Tetratricopeptide repeat (TPR)-like superfamily protein
39108	LG1	11208332	11209812	g1750	PREDICTED: protein LOW PSII ACCUMULATION 2, chloroplastic [Nicotiana tomentosiformis]	NA	0.33,0.32,0.31	NA			NA	NA	NA	NA	NA	NA	NA	NA			AT5G51545.1 | Symbols: LPA2 | low psii accumulation2
39119	LG1	11249587	11255737	g1751	PREDICTED: peptidyl-prolyl cis-trans isomerase CYP59 [Solanum lycopersicum]	NA	0.34,0.33,0.33,0.33,0.32,0.32,0.31	NA	Cyclophilin type peptidyl-prolyl cis-trans isomerase/CLD	Cyclophilin-type peptidyl-prolyl cis-trans isomerase domain	NA	NA	protein peptidyl-prolyl isomerization | peptidyl-prolyl cis-trans isomerase activity	K12735	PPIL4; peptidyl-prolyl cis-trans isomerase-like 4 [EC:5.2.1.8]	A09180 Brite Hierarchies	09182 Protein families: genetic information processing	03041 Spliceosome [BR:ko03041]			AT1G53720.1 | Symbols: ATCYP59, CYP59 | cyclophilin 59
39163	LG1	11256322	11264594	g1752	PREDICTED: vesicle-fusing ATPase [Solanum lycopersicum]	NA	0.34,0.33,0.33,0.33,0.32,0.32,0.31,0.3	NA	ATPase family associated with various cellular activities (AAA)	ATPase, AAA-type, core	NA	NA	ATP binding | ATPase activity	NA	NA	NA	NA	NA			AT4G04910.1 | Symbols: NSF | AAA-type ATPase family protein
39232	LG1	11266392	11271699	g1753	PREDICTED: cytochrome P450 CYP749A22-like [Nicotiana tomentosiformis]	NA	0.34,0.33,0.33,0.32,0.32,0.31,0.3,0.27	NA	Cytochrome P450	Cytochrome P450	NA	NA	iron ion binding | oxidoreductase activity, acting on paired donors, with incorporation or reduction of molecular oxygen | heme binding | oxidation-reduction process	NA	NA	NA	NA	NA			AT2G26710.1 | Symbols: BAS1, CYP734A1, CYP72B1 | Cytochrome P450 superfamily protein
39258	LG1	11280394	11280987	g1754	LG1 AUGUSTUS gene 11280394 11280987 0.08 - .	NA	0.34,0.33,0.33,0.32,0.32,0.31,0.3,0.27	NA	Reverse transcriptase-like	Ribonuclease H domain	NA	NA	nucleic acid binding | RNA-DNA hybrid ribonuclease activity	NA	NA	NA	NA	NA			AT3G09510.1 | Symbols: | Ribonuclease H-like superfamily protein
39266	LG1	11281152	11286269	g1755	PREDICTED: KH domain-containing protein At4g18375 isoform X1 [Sesamum indicum]	NA	0.34,0.33,0.33,0.32,0.32,0.31,0.3,0.27	NA			NA	NA	NA	NA	NA	NA	NA	NA			AT5G09560.1 | Symbols: | RNA-binding KH domain-containing protein
39296	LG1	11286881	11288907	g1756	LG1 AUGUSTUS gene 11286881 11288907 0.03 - .	NA	0.34,0.33,0.33,0.32,0.31,0.3,0.27	NA	Reverse transcriptase-like	Ribonuclease H domain	NA	NA	nucleic acid binding | RNA-DNA hybrid ribonuclease activity	NA	NA	NA	NA	NA			AT1G27870.1 | Symbols: | Polynucleotidyl transferase, ribonuclease H-like superfamily protein
39305	LG1	11289962	11294786	g1757	PREDICTED: uncharacterized protein LOC104119999 [Nicotiana tomentosiformis]	NA	0.34,0.33,0.33,0.32,0.3,0.27	NA			NA	NA	NA	NA	NA	NA	NA	NA			AT3G54800.2 | Symbols: | Pleckstrin homology (PH) and lipid-binding START domains-containing protein
39350	LG1	11303940	11309597	g1758	PREDICTED: monocopper oxidase-like protein SKS1 [Nicotiana tomentosiformis]	NA	0.34,0.32,0.3,0.27	NA	Multicopper oxidase; Multicopper oxidase; Multicopper oxidase	Multicopper oxidase, type 2; Multicopper oxidase, type 1; Multicopper oxidase, type 3	NA	NA	copper ion binding | oxidoreductase activity | oxidation-reduction process	NA	NA	NA	NA	NA			AT4G12420.2 | Symbols: SKU5 | Cupredoxin superfamily protein
39385	LG1	11314462	11320665	g1759	PREDICTED: pentatricopeptide repeat-containing protein At5g14080 isoform X1 [Nicotiana sylvestris]	NA	0.34,0.32,0.3,0.27	NA			NA	NA	NA	NA	NA	NA	NA	NA			AT5G14080.1 | Symbols: | Tetratricopeptide repeat (TPR)-like superfamily protein
39421	LG1	11323127	11326627	g1760	LG1 AUGUSTUS gene 11323127 11326627 0.05 - .	NA	0.34,0.32,0.3,0.27	NA			NA	NA	NA	NA	NA	NA	NA	NA			NA
39438	LG1	11327831	11328797	g1761	PREDICTED: probable pectinesterase/pectinesterase inhibitor 17 [Solanum lycopersicum]	NA	0.32,0.3,0.27	NA	Pectinesterase	Pectinesterase, catalytic	NA	NA	pectinesterase activity | cell wall modification	NA	NA	NA	NA	NA			AT2G45220.1 | Symbols: | Plant invertase/pectin methylesterase inhibitor superfamily
39449	LG1	11331689	11332847	g1762	PREDICTED: probable pectinesterase/pectinesterase inhibitor 17 [Nicotiana tomentosiformis]	NA	0.3,0.27	NA	Plant invertase/pectin methylesterase inhibitor; Pectinesterase	Pectinesterase inhibitor domain; Pectinesterase, catalytic	enzyme regulator activity	NA	enzyme inhibitor activity	NA	NA	NA	NA	NA			AT2G45220.1 | Symbols: | Plant invertase/pectin methylesterase inhibitor superfamily
39457	LG1	11340732	11342404	g1763	PREDICTED: uncharacterized protein LOC104104987 [Nicotiana tomentosiformis]	NA	0.27	NA			NA	NA	NA	NA	NA	NA	NA	NA			NA
39471	LG1	11342677	11350297	g1764	PREDICTED: acid beta-fructofuranosidase AIV-18 [Nicotiana sylvestris]	NA	0.27	NA	Domain of unknown function (DUF3357)	Beta-fructofuranosidase	NA	NA	beta-fructofuranosidase activity | sucrose alpha-glucosidase activity	K01193	INV, sacA; beta-fructofuranosidase [EC:3.2.1.26]	A09100 Metabolism	09101 Carbohydrate metabolism	00052 Galactose metabolism [PATH:ko00052]			AT1G62660.1 | Symbols: | Glycosyl hydrolases family 32 protein
40273	LG1	11645690	11645998	g1802	LG1 AUGUSTUS gene 11645690 11645998 0.15 + .	NA	0.28	NA			NA	NA	NA	NA	NA	NA	NA	NA			NA
40281	LG1	11647142	11649605	g1803	PREDICTED: E3 ubiquitin-protein ligase ORTHRUS 2-like [Solanum lycopersicum]	NA	0.28	NA			NA	NA	NA	NA	NA	NA	NA	NA			NA
40296	LG1	11655540	11660495	g1804	PREDICTED: protein RFT1 homolog isoform X1 [Solanum tuberosum]	NA	0.33,0.28	NA	Rft protein	RFT1	NA	NA	dolichol-linked oligosaccharide biosynthetic process | integral component of membrane	K06316	RFT1; oligosaccharide translocation protein RFT1	A09180 Brite Hierarchies	09183 Protein families: signaling and cellular processes	02000 Transporters [BR:ko02000]			AT5G07630.1 | Symbols: | lipid transporters
40340	LG1	11667298	11671885	g1805	PREDICTED: 60S ribosomal protein L15-like [Sesamum indicum]	NA	0.33,0.33,0.28	NA	Ribosomal L15	Ribosomal protein L15e	NA	NA	structural constituent of ribosome | ribosome | translation	K02877	RP-L15e, RPL15; large subunit ribosomal protein L15e	A09120 Genetic Information Processing	09122 Translation	03010 Ribosome [PATH:ko03010]			AT4G16720.1 | Symbols: | Ribosomal protein L23/L15e family protein
40358	LG1	11675708	11682495	g1806	PREDICTED: uncharacterized protein LOC105167219 [Sesamum indicum]	NA	0.33,0.33,0.31,0.28	NA	Reverse transcriptase-like	Ribonuclease H domain	NA	NA	nucleic acid binding | RNA-DNA hybrid ribonuclease activity	NA	NA	NA	NA	NA			AT4G29090.1 | Symbols: | Ribonuclease H-like superfamily protein
40381	LG1	11687800	11690984	g1807	PREDICTED: putative leucine-rich repeat receptor-like protein kinase At2g19210-like [Solanum tuberosum]	NA	0.33,0.33,0.31,0.31,0.28	NA			NA	NA	NA	NA	NA	NA	NA	NA			AT4G29180.2 | Symbols: RHS16 | root hair specific 16
40401	LG1	11695410	11699766	g1808	PREDICTED: putative leucine-rich repeat receptor-like protein kinase At2g19210-like [Solanum tuberosum]	NA	0.33,0.33,0.31,0.31,0.31,0.28	NA	Protein tyrosine and serine/threonine kinase	Serine-threonine/tyrosine-protein kinase, catalytic domain	NA	NA	protein kinase activity | protein phosphorylation	NA	NA	NA	NA	NA			AT1G51890.2 | Symbols: | Leucine-rich repeat protein kinase family protein
40424	LG1	11708014	11709191	g1809	LG1 AUGUSTUS gene 11708014 11709191 0.05 - .	NA	0.33,0.33,0.31,0.31,0.31,0.28,0.27	NA			NA	NA	NA	NA	NA	NA	NA	NA			AT3G42140.1 | Symbols: | zinc ion binding;nucleic acid binding
40435	LG1	11709466	11715019	g1810	PREDICTED: protein RFT1 homolog [Solanum lycopersicum]	NA	0.33,0.33,0.31,0.31,0.31,0.27	NA	Rft protein	RFT1	NA	NA	dolichol-linked oligosaccharide biosynthetic process | integral component of membrane	NA	NA	NA	NA	NA			AT5G07630.1 | Symbols: | lipid transporters
40479	LG1	11729866	11741693	g1811	PREDICTED: putative leucine-rich repeat receptor-like protein kinase At2g19210-like [Solanum tuberosum]	NA	0.33,0.31,0.31,0.31,0.27	NA	Protein tyrosine and serine/threonine kinase	Serine-threonine/tyrosine-protein kinase, catalytic domain	NA	NA	protein kinase activity | protein phosphorylation	NA	NA	NA	NA	NA			AT3G46420.1 | Symbols: | Leucine-rich repeat protein kinase family protein
40526	LG1	11755026	11758801	g1812	PREDICTED: derlin-1-like [Nicotiana tomentosiformis]	NA	0.31,0.31,0.31,0.27	NA			NA	NA	NA	NA	NA	NA	NA	NA			AT4G29330.1 | Symbols: DER1 | DERLIN-1
40538	LG1	11766406	11769641	g1813	PREDICTED: COBRA-like protein 7 [Solanum lycopersicum]	NA	0.31,0.31,0.27	NA	COBRA-like protein	COBRA, plant	NA	NA	cellulose microfibril organization | anchored component of membrane	NA	NA	NA	NA	NA			AT4G16120.1 | Symbols: ATSEB1, COBL7, SEB1 | COBRA-like protein-7 precursor
40549	LG1	11772463	11776061	g1814	PREDICTED: pentatricopeptide repeat-containing protein At5g66520-like [Solanum tuberosum]	NA	0.31,0.27	NA	DYW family of nucleic acid deaminases	DYW domain	NA	NA	zinc ion binding	NA	NA	NA	NA	NA			AT5G66520.1 | Symbols: | Tetratricopeptide repeat (TPR)-like superfamily protein
40561	LG1	11776382	11789891	g1815	PREDICTED: ATP-dependent 6-phosphofructokinase 4, chloroplastic {ECO:0000255|HAMAP-Rule:MF_03186} [Nicotiana tomentosiformis]	NA	0.27	NA	Phosphofructokinase	Phosphofructokinase domain	NA	NA	6-phosphofructokinase activity | glycolytic process	K00850	pfkA, PFK; 6-phosphofructokinase 1 [EC:2.7.1.11]	A09100 Metabolism	09101 Carbohydrate metabolism	00010 Glycolysis / Gluconeogenesis [PATH:ko00010]			AT5G61580.1 | Symbols: PFK4 | phosphofructokinase 4
40619	LG1	11790106	11793614	g1816	PREDICTED: putative late blight resistance protein homolog R1A-10 isoform X1 [Sesamum indicum]	NA	0.27	NA	NB-ARC domain	NB-ARC	NA	NA	ADP binding	NA	NA	NA	NA	NA			AT3G46530.1 | Symbols: RPP13 | NB-ARC domain-containing disease resistance protein
41732	LG1	12179730	12184790	g1871	sucrose transporter [Nicotiana tabacum]	NA	0.27	NA			NA	NA	NA	K15378	SLC45A1_2_4; solute carrier family 45, member 1/2/4	A09180 Brite Hierarchies	09183 Protein families: signaling and cellular processes	02000 Transporters [BR:ko02000]			AT1G71890.1 | Symbols: SUC5, ATSUC5 | Major facilitator superfamily protein
41752	LG1	12189731	12192095	g1872	PREDICTED: uncharacterized protein LOC102591431 [Solanum tuberosum]	NA	0.27,0.27	NA			NA	NA	NA	NA	NA	NA	NA	NA			AT1G49920.1 | Symbols: | MuDR family transposase
41770	LG1	12193161	12195565	g1873	PREDICTED: uncharacterized protein LOC104234054 isoform X1 [Nicotiana sylvestris]	NA	0.27,0.27	NA			NA	NA	NA	NA	NA	NA	NA	NA			NA
41790	LG1	12195798	12196565	g1874	PREDICTED: proton-coupled amino acid transporter 3-like [Nicotiana tomentosiformis]	NA	0.27,0.27	NA			NA	NA	NA	NA	NA	NA	NA	NA			AT4G38250.1 | Symbols: | Transmembrane amino acid transporter family protein
41798	LG1	12196710	12197436	g1875	LG1 AUGUSTUS gene 12196710 12197436 0.36 + .	NA	0.27,0.27	NA			NA	NA	NA	NA	NA	NA	NA	NA			NA
41806	LG1	12197941	12198835	g1876	PREDICTED: uncharacterized protein LOC102605978 [Solanum tuberosum]	NA	0.27,0.27	NA			NA	NA	NA	NA	NA	NA	NA	NA			NA
41826	LG1	12203144	12208495	g1877	PREDICTED: uncharacterized protein LOC104234054 isoform X1 [Nicotiana sylvestris]	NA	0.27,0.27	NA			NA	NA	NA	NA	NA	NA	NA	NA			AT1G21610.1 | Symbols: | wound-responsive family protein
41852	LG1	12210904	12212585	g1878	PREDICTED: uncharacterized protein LOC104114439 [Nicotiana tomentosiformis]	NA	0.27,0.27	NA			NA	NA	NA	NA	NA	NA	NA	NA			AT3G09510.1 | Symbols: | Ribonuclease H-like superfamily protein
41872	LG1	12212751	12217555	g1879	PREDICTED: uncharacterized protein LOC104239924 [Nicotiana sylvestris]	NA	0.27,0.27	NA			NA	NA	NA	NA	NA	NA	NA	NA			ATMG01250.1 | Symbols: ORF102 | RNA-directed DNA polymerase (reverse transcriptase)
41901	LG1	12218706	12224485	g1880	PREDICTED: uncharacterized WD repeat-containing protein C2A9.03 [Sesamum indicum]	NA	0.27,0.27	NA	WD domain, G-beta repeat	WD40 repeat	NA	NA	protein binding	NA	NA	NA	NA	NA			AT1G78070.1 | Symbols: | Transducin/WD40 repeat-like superfamily protein
41937	LG1	12235250	12239301	g1881	PREDICTED: uncharacterized protein LOC104238670 [Nicotiana sylvestris]	NA	0.27,0.27	NA			NA	NA	NA	NA	NA	NA	NA	NA			NA
41960	LG1	12250608	12254416	g1882	PREDICTED: probable beta-D-xylosidase 7 [Nicotiana tomentosiformis]	NA	0.27	NA	Glycosyl hydrolase family 3 N terminal domain	Glycoside hydrolase, family 3, N-terminal	NA	NA	hydrolase activity, hydrolyzing O-glycosyl compounds | carbohydrate metabolic process	K05349	bglX; beta-glucosidase [EC:3.2.1.21]	A09100 Metabolism	09101 Carbohydrate metabolism	00500 Starch and sucrose metabolism [PATH:ko00500]			AT1G78060.1 | Symbols: | Glycosyl hydrolase family protein
41986	LG1	12278173	12279063	g1883	LG1 AUGUSTUS gene 12278173 12279063 0.02 - .	NA	0.27	NA			NA	NA	NA	NA	NA	NA	NA	NA			NA
44480	LG1	13424216	13426264	g2016	PREDICTED: putative ribonuclease H protein At1g65750-like [Solanum tuberosum]	NA	0.27	NA			NA	NA	NA	NA	NA	NA	NA	NA			AT4G20520.1 | Symbols: | RNA binding;RNA-directed DNA polymerases
44500	LG1	13428009	13429410	g2017	LG1 AUGUSTUS gene 13428009 13429410 0.02 + .	NA	0.27	NA			NA	NA	NA	NA	NA	NA	NA	NA			NA
44520	LG1	13442527	13443789	g2018	LG1 AUGUSTUS gene 13442527 13443789 0.17 + .	NA	0.3,0.29,0.27	NA			NA	NA	NA	NA	NA	NA	NA	NA			NA
44534	LG1	13443967	13448054	g2019	PREDICTED: probable F-actin-capping protein subunit beta-like [Solanum tuberosum]	NA	0.3,0.29,0.27	NA	F-actin capping protein, beta subunit	F-actin-capping protein subunit beta	NA	NA	F-actin capping protein complex | barbed-end actin filament capping	NA	NA	NA	NA	NA			AT1G71790.1 | Symbols: | Subunits of heterodimeric actin filament capping protein Capz superfamily
44566	LG1	13455667	13458200	g2020	PREDICTED: probable tRNA modification GTPase MnmE {ECO:0000255|HAMAP-Rule:MF_00379} isoform X1 [Nicotiana tomentosiformis]	NA	0.3,0.3,0.29,0.27	NA			NA	NA	NA	NA	NA	NA	NA	NA			NA
44575	LG1	13467092	13469132	g2021	LG1 AUGUSTUS gene 13467092 13469132 0.12 - .	NA	0.32,0.3,0.3,0.29,0.27	NA			NA	NA	NA	NA	NA	NA	NA	NA			NA
44589	LG1	13475017	13477124	g2022	LG1 AUGUSTUS gene 13475017 13477124 0.03 + .	NA	0.32,0.31,0.3,0.3,0.29,0.27	NA			NA	NA	NA	NA	NA	NA	NA	NA			NA
44601	LG1	13478887	13484083	g2023	PREDICTED: uncharacterized protein LOC104221303 [Nicotiana sylvestris]	NA	0.32,0.31,0.3,0.3,0.29,0.27	NA			NA	NA	NA	NA	NA	NA	NA	NA			AT4G29090.1 | Symbols: | Ribonuclease H-like superfamily protein
44636	LG1	13488964	13490132	g2024	LG1 AUGUSTUS gene 13488964 13490132 0.2 - .	NA	0.32,0.31,0.3,0.3,0.3,0.29,0.27	NA			NA	NA	NA	NA	NA	NA	NA	NA			NA
44647	LG1	13496074	13497582	g2025	LG1 AUGUSTUS gene 13496074 13497582 0.03 - .	NA	0.32,0.31,0.3,0.3,0.3,0.3,0.29,0.27	NA			NA	NA	NA	NA	NA	NA	NA	NA			NA
44658	LG1	13506576	13507742	g2026	LG1 AUGUSTUS gene 13506576 13507742 0.1 - .	NA	0.32,0.31,0.3,0.3,0.3,0.3,0.29,0.28,0.27	NA			NA	NA	NA	NA	NA	NA	NA	NA			NA
44672	LG1	13512270	13513932	g2027	LG1 AUGUSTUS gene 13512270 13513932 0.03 - .	NA	0.32,0.31,0.3,0.3,0.3,0.29,0.28	NA			NA	NA	NA	NA	NA	NA	NA	NA			NA
44683	LG1	13530227	13531342	g2028	LG1 AUGUSTUS gene 13530227 13531342 0.2 - .	NA	0.32,0.31,0.3,0.3,0.3,0.29,0.28	NA			NA	NA	NA	NA	NA	NA	NA	NA			NA
44691	LG1	13535520	13537002	g2029	LG1 AUGUSTUS gene 13535520 13537002 0.34 - .	NA	0.32,0.31,0.3,0.3,0.3,0.28	NA			NA	NA	NA	NA	NA	NA	NA	NA			NA
44705	LG1	13537831	13543212	g2030	PREDICTED: uncharacterized protein LOC101258693 isoform X1 [Solanum lycopersicum]	NA	0.32,0.31,0.3,0.3,0.3,0.28	NA	NHL repeat	NHL repeat	NA	NA	protein binding	NA	NA	NA	NA	NA			AT3G07060.1 | Symbols: emb1974 | NHL domain-containing protein
44749	LG1	13544127	13544633	g2031	LG1 AUGUSTUS gene 13544127 13544633 0.24 + .	NA	0.32,0.31,0.3,0.3,0.3,0.28	NA			NA	NA	NA	NA	NA	NA	NA	NA			NA
44760	LG1	13546315	13549412	g2032	PREDICTED: uncharacterized protein LOC101258693 isoform X1 [Solanum lycopersicum]	NA	0.32,0.31,0.3,0.3,0.28	NA			NA	NA	NA	NA	NA	NA	NA	NA			AT3G07060.1 | Symbols: emb1974 | NHL domain-containing protein
44786	LG1	13551236	13552282	g2033	LG1 AUGUSTUS gene 13551236 13552282 0.1 - .	NA	0.32,0.31,0.3,0.3,0.28	NA			NA	NA	NA	NA	NA	NA	NA	NA			NA
44795	LG1	13554047	13559131	g2034	PREDICTED: 40S ribosomal protein S27-2 [Nicotiana tomentosiformis]	NA	0.31,0.3,0.3,0.28	NA	Ribosomal protein S27	Ribosomal protein S27e	NA	NA	structural constituent of ribosome | ribosome | translation	K02978	RP-S27e, RPS27; small subunit ribosomal protein S27e	A09120 Genetic Information Processing	09122 Translation	03010 Ribosome [PATH:ko03010]			AT3G61110.1 | Symbols: ARS27A, RS27A | ribosomal protein S27
44830	LG1	13564089	13568562	g2035	PREDICTED: zinc finger BED domain-containing protein RICESLEEPER 1-like [Sesamum indicum]	NA	0.3,0.3,0.28	NA	Reverse transcriptase-like; Domain of unknown function (DUF4413)	Ribonuclease H domain; hAT-like transposase, RNase-H fold	NA	NA	nucleic acid binding | RNA-DNA hybrid ribonuclease activity	NA	NA	NA	NA	NA			AT3G42170.1 | Symbols: | BED zinc finger ;hAT family dimerisation domain
44847	LG1	13568897	13572600	g2036	PREDICTED: 40S ribosomal protein S27-2-like [Solanum tuberosum]	NA	0.3,0.3,0.28	NA	Ribosomal protein S27	Ribosomal protein S27e	NA	NA	structural constituent of ribosome | ribosome | translation	K02978	RP-S27e, RPS27; small subunit ribosomal protein S27e	A09120 Genetic Information Processing	09122 Translation	03010 Ribosome [PATH:ko03010]			AT3G61110.1 | Symbols: ARS27A, RS27A | ribosomal protein S27
44916	LG1	13625840	13630313	g2039	PREDICTED: uncharacterized protein LOC104091757 [Nicotiana tomentosiformis]	1.52	NA	NA			NA	NA	NA	NA	NA	NA	NA	NA			NA
44948	LG1	13639048	13651118	g2040	PREDICTED: pleiotropic drug resistance protein 2-like [Sesamum indicum]	1.52,1.51	NA	NA	ABC-2 type transporter; ABC transporter; Leucine Rich Repeat; ABC-2 type transporter; Protein tyrosine and serine/threonine kinase	ABC transporter family G domain; ABC transporter-like; Leucine-rich repeat; ABC-2 type transporter; Serine-threonine/tyrosine-protein kinase, catalytic domain	NA	NA	ATPase activity, coupled to transmembrane movement of substances	NA	NA	NA	NA	NA			AT2G36380.1 | Symbols: PDR6, ATPDR6 | pleiotropic drug resistance 6
45044	LG1	13651638	13655799	g2041	copia LTR rider [Solanum lycopersicum]	1.52,1.51	NA	5.82	Integrase core domain	Integrase, catalytic core	DNA integration	NA	DNA integration	NA	NA	NA	NA	NA			AT4G23160.1 | Symbols: CRK8 | cysteine-rich RLK (RECEPTOR-like protein kinase) 8
45076	LG1	13665238	13666215	g2042	LG1 AUGUSTUS gene 13665238 13666215 0.16 + .	1.52,1.51	NA	5.82			NA	NA	NA	NA	NA	NA	NA	NA			NA
45087	LG1	13671798	13673168	g2043	PREDICTED: uncharacterized protein LOC104210538 [Nicotiana sylvestris]	1.52,1.51	NA	5.82			NA	NA	NA	NA	NA	NA	NA	NA			NA
45104	LG1	13705511	13708963	g2044	LG1 AUGUSTUS gene 13705511 13708963 0.02 - .	1.52,1.51	NA	5.82			NA	NA	NA	NA	NA	NA	NA	NA			NA
45130	LG1	13729398	13734188	g2045	PREDICTED: phospho-2-dehydro-3-deoxyheptonate aldolase 1, chloroplastic-like [Nicotiana tomentosiformis]	NA	NA	5.82	Class-II DAHP synthetase family	DAHP synthetase, class II	NA	NA	3-deoxy-7-phosphoheptulonate synthase activity | aromatic amino acid family biosynthetic process	NA	NA	NA	NA	NA			AT4G33510.1 | Symbols: DHS2 | 3-deoxy-d-arabino-heptulosonate 7-phosphate synthase
45153	LG1	13740128	13740760	g2046	PREDICTED: vacuolar protein 8 [Sesamum indicum]	NA	NA	5.82			NA	NA	NA	NA	NA	NA	NA	NA			AT2G05810.2 | Symbols: | ARM repeat superfamily protein
45167	LG1	13761057	13769283	g2047	PREDICTED: uncharacterized protein LOC104229533, partial [Nicotiana sylvestris]	NA	NA	5.82			NA	NA	NA	NA	NA	NA	NA	NA			NA
45220	LG1	13772356	13774233	g2048	LG1 AUGUSTUS gene 13772356 13774233 0.1 - .	NA	NA	5.82			NA	NA	NA	NA	NA	NA	NA	NA			NA
45235	LG1	13776298	13779986	g2049	PREDICTED: UDP-galactose transporter 2-like [Sesamum indicum]	NA	NA	5.82			NA	NA	NA	NA	NA	NA	NA	NA			AT1G34020.1 | Symbols: | Nucleotide-sugar transporter family protein
45256	LG1	13781546	13782813	g2050	PREDICTED: LOW QUALITY PROTEIN: uncharacterized protein LOC104223244 [Nicotiana sylvestris]	NA	NA	5.82			NA	NA	NA	NA	NA	NA	NA	NA			NA
45270	LG1	13788308	13794988	g2051	PREDICTED: protein GIGANTEA-like isoform X1 [Solanum tuberosum]	NA	NA	5.82			NA	NA	NA	NA	NA	NA	NA	NA			AT1G22770.1 | Symbols: GI, FB | gigantea protein (GI)
45317	LG1	13797203	13797830	g2052	Polyprotein, putative [Solanum demissum]	NA	NA	5.82			NA	NA	NA	NA	NA	NA	NA	NA			NA
45328	LG1	13797838	13804798	g2053	PREDICTED: protein GIGANTEA-like [Nicotiana tomentosiformis]	NA	NA	5.82			NA	NA	NA	NA	NA	NA	NA	NA			AT1G22770.1 | Symbols: GI, FB | gigantea protein (GI)
45370	LG1	13806863	13809620	g2054	PREDICTED: LOW QUALITY PROTEIN: uncharacterized protein LOC104223244 [Nicotiana sylvestris]	NA	NA	5.82			NA	NA	NA	NA	NA	NA	NA	NA			NA
45383	LG1	13812983	13819764	g2055	PREDICTED: methionine gamma-lyase-like [Solanum tuberosum]	NA	NA	5.82			NA	NA	NA	NA	NA	NA	NA	NA			AT1G64660.1 | Symbols: ATMGL, MGL | methionine gamma-lyase
45398	LG1	13827873	13831097	g2056	Integrase core domain containing protein [Solanum demissum]	NA	NA	5.82			NA	NA	NA	NA	NA	NA	NA	NA			NA
45424	LG1	13843465	13844398	g2057	LG1 AUGUSTUS gene 13843465 13844398 0.07 - .	NA	NA	5.82			NA	NA	NA	NA	NA	NA	NA	NA			NA
45435	LG1	13847197	13848748	g2058	PREDICTED: uncharacterized protein LOC104212115 isoform X1 [Nicotiana sylvestris]	NA	NA	5.82	Mur ligase family, glutamate ligase domain	Mur ligase, C-terminal	NA	NA	ATP binding | biosynthetic process | ligase activity	NA	NA	NA	NA	NA			NA
46668	LG1	14398326	14412594	g2120	PREDICTED: sterol 3-beta-glucosyltransferase UGT80B1 [Nicotiana tomentosiformis]	NA	NA	4.93	UDP-glucoronosyl and UDP-glucosyl transferase; Glycosyltransferase family 28 N-terminal domain	UDP-glucuronosyl/UDP-glucosyltransferase; Glycosyltransferase family 28, N-terminal domain	NA	NA	UDP-glycosyltransferase activity	K05841	E2.4.1.173; sterol 3beta-glucosyltransferase [EC:2.4.1.173]	A09180 Brite Hierarchies	09181 Protein families: metabolism	01003 Glycosyltransferases [BR:ko01003]			NA
46722	LG1	14413670	14414291	g2121	LG1 AUGUSTUS gene 14413670 14414291 0.03 - .	NA	NA	4.93			NA	NA	NA	NA	NA	NA	NA	NA			NA
46730	LG1	14416936	14419778	g2122	LG1 AUGUSTUS gene 14416936 14419778 0.04 + .	NA	NA	4.93			NA	NA	NA	NA	NA	NA	NA	NA			NA
46743	LG1	14425756	14428342	g2123	PREDICTED: thioredoxin Y1, chloroplastic [Nicotiana sylvestris]	NA	NA	4.93			NA	NA	NA	NA	NA	NA	NA	NA			AT1G76760.1 | Symbols: ATY1, TRX-Y1, TY1 | thioredoxin Y1
46760	LG1	14429916	14432391	g2124	LG1 AUGUSTUS gene 14429916 14432391 0.05 - .	NA	NA	4.93			NA	NA	NA	NA	NA	NA	NA	NA			NA
46772	LG1	14432796	14434433	g2125	LG1 AUGUSTUS gene 14432796 14434433 0.04 + .	NA	NA	4.93			NA	NA	NA	NA	NA	NA	NA	NA			NA
46783	LG1	14446046	14447221	g2126	LG1 AUGUSTUS gene 14446046 14447221 0.06 - .	NA	NA	4.93			NA	NA	NA	NA	NA	NA	NA	NA			NA
46795	LG1	14449774	14450421	g2127	PREDICTED: uncharacterized protein LOC104098435, partial [Nicotiana tomentosiformis]	NA	NA	4.93			NA	NA	NA	NA	NA	NA	NA	NA			NA
46803	LG1	14451923	14454381	g2128	PREDICTED: LOW QUALITY PROTEIN: uncharacterized protein LOC104235718, partial [Nicotiana sylvestris]	NA	NA	4.93			NA	NA	NA	NA	NA	NA	NA	NA			NA
46823	LG1	14454470	14458131	g2129	LG1 AUGUSTUS gene 14454470 14458131 0.07 - .	NA	NA	4.93			NA	NA	NA	NA	NA	NA	NA	NA			NA
46835	LG1	14461308	14467132	g2130	myo-inositol oxygenase [Solanum lycopersicum]	NA	NA	4.93	Myo-inositol oxygenase	Inositol oxygenase	NA	NA	iron ion binding | cytoplasm | inositol catabolic process | inositol oxygenase activity | oxidation-reduction process	NA	NA	NA	NA	NA			AT4G26260.2 | Symbols: MIOX4 | myo-inositol oxygenase 4
46867	LG1	14468127	14471303	g2131	PREDICTED: protein FAR1-RELATED SEQUENCE 7-like isoform X1 [Nicotiana tomentosiformis]	NA	NA	4.93			NA	NA	NA	NA	NA	NA	NA	NA			AT3G07500.1 | Symbols: | Far-red impaired responsive (FAR1) family protein
46881	LG1	14473387	14475269	g2132	LG1 AUGUSTUS gene 14473387 14475269 0.11 + .	NA	NA	4.93			NA	NA	NA	NA	NA	NA	NA	NA			NA
46892	LG1	14478407	14481001	g2133	LG1 AUGUSTUS gene 14478407 14481001 0.11 + .	NA	NA	4.93			NA	NA	NA	NA	NA	NA	NA	NA			NA
46906	LG1	14481097	14482965	g2134	LG1 AUGUSTUS gene 14481097 14482965 0.06 + .	NA	NA	4.93			NA	NA	NA	NA	NA	NA	NA	NA			NA
46915	LG1	14485577	14488781	g2135	PREDICTED: protein FAR-RED ELONGATED HYPOCOTYL 3 isoform X1 [Sesamum indicum]	NA	NA	4.93			NA	NA	NA	NA	NA	NA	NA	NA			NA
46941	LG1	14489048	14493252	g2136	LG1 AUGUSTUS gene 14489048 14493252 0.01 - .	NA	NA	4.93			NA	NA	NA	NA	NA	NA	NA	NA			NA
46983	LG1	14494383	14500632	g2137	LG1 AUGUSTUS gene 14494383 14500632 0.09 - .	NA	NA	4.93			NA	NA	NA	NA	NA	NA	NA	NA			NA
46995	LG1	14505072	14512482	g2138	PREDICTED: uncharacterized protein LOC104223382 [Nicotiana sylvestris]	NA	NA	4.93			NA	NA	NA	NA	NA	NA	NA	NA			NA
47034	LG1	14512977	14513807	g2139	LG1 AUGUSTUS gene 14512977 14513807 0.12 + .	NA	NA	4.93			NA	NA	NA	NA	NA	NA	NA	NA			NA
47045	LG1	14514714	14522442	g2140	PREDICTED: uncharacterized protein LOC104243397 [Nicotiana sylvestris]	NA	NA	4.93			NA	NA	NA	NA	NA	NA	NA	NA			AT4G23160.1 | Symbols: CRK8 | cysteine-rich RLK (RECEPTOR-like protein kinase) 8
47078	LG1	14522569	14525772	g2141	PREDICTED: uncharacterized protein LOC105171278 [Sesamum indicum]	NA	NA	4.93			NA	NA	NA	NA	NA	NA	NA	NA			NA
47093	LG1	14531567	14541752	g2142	PREDICTED: uncharacterized protein LOC105167219 [Sesamum indicum]	NA	NA	4.93	Reverse transcriptase-like	Ribonuclease H domain	NA	NA	nucleic acid binding | RNA-DNA hybrid ribonuclease activity	NA	NA	NA	NA	NA			AT2G01050.1 | Symbols: | zinc ion binding;nucleic acid binding
47144	LG1	14546883	14553712	g2143	PREDICTED: uncharacterized protein LOC105172769 [Sesamum indicum]	NA	NA	4.93	Zinc knuckle	Zinc finger, CCHC-type	NA	NA	nucleic acid binding | zinc ion binding	NA	NA	NA	NA	NA			NA
47168	LG1	14557237	14558332	g2144	PREDICTED: putative SWI/SNF-related matrix-associated actin-dependent regulator of chromatin subfamily A member 3-like 3 [Sesamum indicum]	NA	NA	4.93			NA	NA	NA	NA	NA	NA	NA	NA			AT5G43530.1 | Symbols: | Helicase protein with RING/U-box domain
47182	LG1	14575274	14581072	g2145	LG1 AUGUSTUS gene 14575274 14581072 0.01 - .	NA	NA	4.93			NA	NA	NA	NA	NA	NA	NA	NA			NA
47214	LG1	14581349	14582032	g2146	LG1 AUGUSTUS gene 14581349 14582032 0.14 - .	NA	NA	4.93			NA	NA	NA	NA	NA	NA	NA	NA			NA
47793	LG1	14800335	14805917	g2173	PREDICTED: uncharacterized protein LOC104227677 [Nicotiana sylvestris]	NA	0.27	NA	PIF1-like helicase	DNA helicase Pif1-like	NA	NA	telomere maintenance | DNA helicase activity | DNA repair	NA	NA	NA	NA	NA			AT5G28780.1 | Symbols: | PIF1 helicase
47811	LG1	14808652	14809604	g2174	LG1 AUGUSTUS gene 14808652 14809604 0.46 + .	NA	0.27	NA			NA	NA	NA	NA	NA	NA	NA	NA			NA
47822	LG1	14812462	14816469	g2175	LG1 AUGUSTUS gene 14812462 14816469 0.02 + .	NA	0.29,0.27	NA			NA	NA	NA	NA	NA	NA	NA	NA			NA
47846	LG1	14818199	14821517	g2176	PREDICTED: desiccation-related protein PCC13-62-like [Nicotiana sylvestris]	NA	0.29,0.27	NA			NA	NA	NA	NA	NA	NA	NA	NA			AT1G47980.1 | Symbols: | unknown protein; FUNCTIONS IN: molecular_function unknown; INVOLVED IN: biological_process unknown; LOCATED IN: endomembrane system; EXPRESSED IN: 6 plant structures; EXPRESSED DURING: 4 anthesis, F mature embryo stage, petal differentiation and expansion stage, E expanded cotyledon stage; BEST Arabidopsis thaliana protein match is: unknown protein (TAIR:AT3G62730.1); Has…
47869	LG1	14821722	14824474	g2177	PREDICTED: uncharacterized protein LOC101249672 [Solanum lycopersicum]	NA	0.29,0.27	NA			NA	NA	NA	NA	NA	NA	NA	NA			NA
47889	LG1	14833452	14838549	g2178	LG1 AUGUSTUS gene 14833452 14838549 0.19 + .	NA	0.29,0.27	NA			NA	NA	NA	NA	NA	NA	NA	NA			NA
47898	LG1	14841834	14849977	g2179	PREDICTED: uncharacterized protein LOC104246050 [Nicotiana sylvestris]	NA	0.29,0.27	NA	Reverse transcriptase-like	Ribonuclease H domain	NA	NA	nucleic acid binding | RNA-DNA hybrid ribonuclease activity	NA	NA	NA	NA	NA			AT3G09510.1 | Symbols: | Ribonuclease H-like superfamily protein
47946	LG1	14859332	14859879	g2180	LG1 AUGUSTUS gene 14859332 14859879 0.07 + .	NA	0.29,0.27	NA			NA	NA	NA	NA	NA	NA	NA	NA			NA
47954	LG1	14861862	14864554	g2181	PREDICTED: uncharacterized protein LOC104212204 [Nicotiana sylvestris]	NA	0.29,0.27	NA			NA	NA	NA	NA	NA	NA	NA	NA			AT4G29110.1 | Symbols: | unknown protein; FUNCTIONS IN: molecular_function unknown; INVOLVED IN: response to chitin; LOCATED IN: vacuole; BEST Arabidopsis thaliana protein match is: unknown protein (TAIR:AT1G52140.1); Has 109 Blast hits to 109 proteins in 16 species: Archae - 0; Bacteria - 0; Metazoa - 0; Fungi - 0; Plants - 109; Viruses - 0; Other Eukaryotes - 0 (source: NCBI BLink).
47963	LG1	14870192	14871055	g2182	PREDICTED: 26S proteasome regulatory subunit RPN13 [Sesamum indicum]	NA	0.29,0.27	NA			NA	NA	NA	NA	NA	NA	NA	NA			NA
47971	LG1	14875542	14877156	g2183	LG1 AUGUSTUS gene 14875542 14877156 0.06 + .	NA	0.29,0.27	NA			NA	NA	NA	NA	NA	NA	NA	NA			NA
47985	LG1	14879882	14882377	g2184	LG1 AUGUSTUS gene 14879882 14882377 0.03 - .	NA	0.29,0.27	NA			NA	NA	NA	NA	NA	NA	NA	NA			NA
53128	LG1	16954263	16963707	g2441	LG1 AUGUSTUS gene 16954263 16963707 0.01 - .	NA	0.27	NA			NA	NA	NA	NA	NA	NA	NA	NA			NA
53140	LG1	16971364	16976437	g2442	PREDICTED: uncharacterized protein LOC105172318 [Sesamum indicum]	NA	0.28,0.27	NA			NA	NA	NA	NA	NA	NA	NA	NA			NA
53163	LG1	17006247	17008017	g2443	LG1 AUGUSTUS gene 17006247 17008017 0.07 - .	NA	0.28,0.28,0.28,0.27,0.27	NA			NA	NA	NA	NA	NA	NA	NA	NA			NA
53172	LG1	17012021	17018907	g2444	PREDICTED: uncharacterized protein LOC105155556 [Sesamum indicum]	NA	0.28,0.28,0.28,0.27,0.27,0.27	NA	SWIM zinc finger	Zinc finger, SWIM-type	NA	NA	zinc ion binding	NA	NA	NA	NA	NA			AT1G64260.1 | Symbols: | MuDR family transposase
53197	LG1	17019692	17021829	g2445	LG1 AUGUSTUS gene 17019692 17021829 0.08 + .	NA	0.28,0.28,0.28,0.27,0.27,0.27	NA			NA	NA	NA	NA	NA	NA	NA	NA			NA
53206	LG1	17022272	17026666	g2446	LG1 AUGUSTUS gene 17022272 17026666 0.02 + .	NA	0.28,0.28,0.28,0.27,0.27	NA			NA	NA	NA	NA	NA	NA	NA	NA			NA
53216	LG1	17057142	17058446	g2447	LG1 AUGUSTUS gene 17057142 17058446 0.04 + .	NA	0.28,0.28,0.28,0.27,0.27	5.06			NA	NA	NA	NA	NA	NA	NA	NA			NA
53227	LG1	17060036	17066877	g2448	PREDICTED: bidirectional sugar transporter SWEET1-like [Sesamum indicum]	NA	0.28,0.28,0.27,0.27	5.06	Sugar efflux transporter for intercellular exchange	SWEET sugar transporter	NA	NA	integral component of membrane	NA	NA	NA	NA	NA			AT1G21460.1 | Symbols: SWEET1, AtSWEET1 | Nodulin MtN3 family protein
53242	LG1	17074514	17075113	g2449	LG1 AUGUSTUS gene 17074514 17075113 0.1 + .	NA	0.28,0.27,0.27	5.06			NA	NA	NA	NA	NA	NA	NA	NA			NA
53253	LG1	17076944	17081851	g2450	PREDICTED: uncharacterized protein LOC104093994 [Nicotiana tomentosiformis]	NA	0.28,0.27,0.27	5.06			NA	NA	NA	NA	NA	NA	NA	NA			NA
53279	LG1	17087714	17088359	g2451	PREDICTED: uncharacterized protein LOC104119386 [Nicotiana tomentosiformis]	NA	0.27	5.06			NA	NA	NA	NA	NA	NA	NA	NA			AT1G56020.1 | Symbols: | unknown protein; BEST Arabidopsis thaliana protein match is: unknown protein (TAIR:AT3G12970.1); Has 3011 Blast hits to 958 proteins in 192 species: Archae - 0; Bacteria - 193; Metazoa - 479; Fungi - 286; Plants - 158; Viruses - 8; Other Eukaryotes - 1887 (source: NCBI BLink).
53287	LG1	17098304	17100304	g2452	PREDICTED: uncharacterized protein LOC104094071 [Nicotiana tomentosiformis]	NA	0.27	5.06			NA	NA	NA	NA	NA	NA	NA	NA			NA
53301	LG1	17111424	17114575	g2453	PREDICTED: uncharacterized protein LOC104109827 [Nicotiana tomentosiformis]	NA	NA	5.06			NA	NA	NA	NA	NA	NA	NA	NA			NA
53313	LG1	17115914	17119928	g2454	PREDICTED: uncharacterized protein LOC104243397 [Nicotiana sylvestris]	NA	NA	5.06			NA	NA	NA	NA	NA	NA	NA	NA			ATMG00710.1 | Symbols: ORF120 | Polynucleotidyl transferase, ribonuclease H-like superfamily protein
53333	LG1	17120364	17124049	g2455	PREDICTED: psbP domain-containing protein 4, chloroplastic isoform X1 [Nicotiana tomentosiformis]	NA	NA	5.06			NA	NA	NA	NA	NA	NA	NA	NA			AT1G77090.1 | Symbols: | Mog1/PsbP/DUF1795-like photosystem II reaction center PsbP family protein
53356	LG1	17124999	17130619	g2456	PREDICTED: 50S ribosomal protein L15, chloroplastic [Solanum lycopersicum]	NA	NA	5.06			NA	NA	NA	K02876	RP-L15, MRPL15, rplO; large subunit ribosomal protein L15	A09120 Genetic Information Processing	09122 Translation	03010 Ribosome [PATH:ko03010]			AT3G25920.1 | Symbols: RPL15 | ribosomal protein L15
53371	LG1	17135334	17138022	g2457	PREDICTED: protein FAR1-RELATED SEQUENCE 5-like [Nicotiana tomentosiformis]	NA	NA	5.06			NA	NA	NA	NA	NA	NA	NA	NA			AT4G38180.1 | Symbols: FRS5 | FAR1-related sequence 5
53388	LG1	17142864	17145822	g2458	LG1 AUGUSTUS gene 17142864 17145822 0.04 + .	NA	NA	5.06			NA	NA	NA	NA	NA	NA	NA	NA			NA
53406	LG1	17148843	17154509	g2459	LG1 AUGUSTUS gene 17148843 17154509 0.01 - .	NA	NA	5.06			NA	NA	NA	NA	NA	NA	NA	NA			NA
53423	LG1	17155914	17159000	g2460	LG1 AUGUSTUS gene 17155914 17159000 0.01 + .	NA	NA	5.06			NA	NA	NA	NA	NA	NA	NA	NA			NA
53449	LG1	17160781	17161389	g2461	PREDICTED: uncharacterized protein LOC104119782 [Nicotiana tomentosiformis]	NA	NA	5.06			NA	NA	NA	NA	NA	NA	NA	NA			AT1G43790.1 | Symbols: TED6 | tracheary element differentiation-related 6
53457	LG1	17163574	17165194	g2462	LG1 AUGUSTUS gene 17163574 17165194 0.04 + .	NA	NA	5.06			NA	NA	NA	NA	NA	NA	NA	NA			NA
53466	LG1	17166523	17167279	g2463	LG1 AUGUSTUS gene 17166523 17167279 0.13 - .	NA	NA	5.06			NA	NA	NA	NA	NA	NA	NA	NA			NA
53477	LG1	17168264	17169095	g2464	PREDICTED: dirigent protein 21-like [Solanum tuberosum]	NA	NA	5.06			NA	NA	NA	NA	NA	NA	NA	NA			AT2G21110.1 | Symbols: | Disease resistance-responsive (dirigent-like protein) family protein
53488	LG1	17169579	17170179	g2465	PREDICTED: uncharacterized protein LOC104119782 [Nicotiana tomentosiformis]	NA	NA	5.06			NA	NA	NA	NA	NA	NA	NA	NA			AT1G43790.1 | Symbols: TED6 | tracheary element differentiation-related 6
53496	LG1	17172244	17173150	g2466	LG1 AUGUSTUS gene 17172244 17173150 0.36 + .	NA	NA	5.06			NA	NA	NA	NA	NA	NA	NA	NA			NA
53507	LG1	17176951	17177469	g2467	PREDICTED: uncharacterized protein LOC104119782 [Nicotiana tomentosiformis]	NA	NA	5.06			NA	NA	NA	NA	NA	NA	NA	NA			AT1G43790.1 | Symbols: TED6 | tracheary element differentiation-related 6
53515	LG1	17184114	17189924	g2468	PREDICTED: transcription factor bHLH94-like [Nicotiana sylvestris]	NA	NA	5.06			NA	NA	NA	NA	NA	NA	NA	NA			AT1G72210.1 | Symbols: | basic helix-loop-helix (bHLH) DNA-binding superfamily protein
53535	LG1	17194689	17195199	g2469	PREDICTED: uncharacterized protein LOC104119782 [Nicotiana tomentosiformis]	NA	NA	5.06			NA	NA	NA	NA	NA	NA	NA	NA			AT1G43790.1 | Symbols: TED6 | tracheary element differentiation-related 6
53543	LG1	17202094	17205825	g2470	PREDICTED: transcription factor bHLH94-like [Nicotiana sylvestris]	NA	NA	5.06	Helix-loop-helix DNA-binding domain	Myc-type, basic helix-loop-helix (bHLH) domain	NA	NA	protein dimerization activity	NA	NA	NA	NA	NA			AT1G72210.1 | Symbols: | basic helix-loop-helix (bHLH) DNA-binding superfamily protein
53557	LG1	17209894	17211078	g2471	LG1 AUGUSTUS gene 17209894 17211078 0.21 + .	NA	NA	5.06			NA	NA	NA	NA	NA	NA	NA	NA			NA
53571	LG1	17211990	17223029	g2472	PREDICTED: uncharacterized protein LOC104105445 [Nicotiana tomentosiformis]	NA	NA	5.06			NA	NA	NA	NA	NA	NA	NA	NA			NA
55524	LG1	17913796	17915792	g2575	PREDICTED: soluble inorganic pyrophosphatase [Sesamum indicum]	NA	NA	5.87	Inorganic pyrophosphatase	Inorganic pyrophosphatase	NA	NA	magnesium ion binding | inorganic diphosphatase activity | cytoplasm | phosphate-containing compound metabolic process	K01507	ppa; inorganic pyrophosphatase [EC:3.6.1.1]	A09100 Metabolism	09102 Energy metabolism	00190 Oxidative phosphorylation [PATH:ko00190]			AT1G01050.1 | Symbols: AtPPa1, PPa1 | pyrophosphorylase 1
55553	LG1	17920873	17929362	g2576	PREDICTED: uncharacterized protein LOC104096173 [Nicotiana tomentosiformis]	NA	NA	5.87			NA	NA	NA	NA	NA	NA	NA	NA			NA
55589	LG1	17930537	17932280	g2577	LG1 AUGUSTUS gene 17930537 17932280 0.12 + .	NA	NA	5.87			NA	NA	NA	NA	NA	NA	NA	NA			NA
55600	LG1	17951131	17954622	g2578	PREDICTED: uncharacterized protein LOC101245446, partial [Solanum lycopersicum]	NA	NA	5.87			NA	NA	NA	NA	NA	NA	NA	NA			AT1G43760.1 | Symbols: | DNAse I-like superfamily protein
55623	LG1	17957781	17967232	g2579	PREDICTED: perakine reductase-like isoform X1 [Solanum tuberosum]	NA	NA	5.87			NA	NA	NA	NA	NA	NA	NA	NA			NA
55671	LG1	17968307	17971346	g2580	LG1 AUGUSTUS gene 17968307 17971346 0.09 - .	NA	NA	5.87			NA	NA	NA	NA	NA	NA	NA	NA			NA
55683	LG1	17980861	17983906	g2581	unnamed protein product [Solanum lycopersicum]	NA	NA	5.87			NA	NA	NA	NA	NA	NA	NA	NA			AT4G38180.1 | Symbols: FRS5 | FAR1-related sequence 5
55704	LG1	17988381	17993704	g2582	LG1 AUGUSTUS gene 17988381 17993704 0.01 + .	NA	NA	5.87			NA	NA	NA	NA	NA	NA	NA	NA			NA
55725	LG1	17993781	17995689	g2583	LG1 AUGUSTUS gene 17993781 17995689 0.02 + .	NA	NA	5.87			NA	NA	NA	NA	NA	NA	NA	NA			NA
55737	LG1	17995858	17996806	g2584	PREDICTED: uncharacterized protein LOC102585795 [Solanum tuberosum]	NA	NA	5.87			NA	NA	NA	NA	NA	NA	NA	NA			NA
55746	LG1	18003072	18005096	g2585	PREDICTED: uncharacterized protein LOC104098156 [Nicotiana tomentosiformis]	NA	NA	5.87			NA	NA	NA	NA	NA	NA	NA	NA			NA
55772	LG1	18010731	18019613	g2586	PREDICTED: beta-galactosidase-like [Solanum tuberosum]	NA	NA	5.87			NA	NA	NA	NA	NA	NA	NA	NA			AT3G13750.1 | Symbols: BGAL1 | beta galactosidase 1
55843	LG1	18021011	18028625	g2587	PREDICTED: uncharacterized protein LOC104087912 [Nicotiana tomentosiformis]	NA	NA	5.87			NA	NA	NA	NA	NA	NA	NA	NA			AT5G56880.1 | Symbols: | unknown protein; Has 9 Blast hits to 9 proteins in 5 species: Archae - 0; Bacteria - 0; Metazoa - 0; Fungi - 0; Plants - 9; Viruses - 0; Other Eukaryotes - 0 (source: NCBI BLink).
55860	LG1	18032592	18035096	g2588	LG1 AUGUSTUS gene 18032592 18035096 0.02 - .	NA	NA	5.87			NA	NA	NA	NA	NA	NA	NA	NA			NA
55877	LG1	18040834	18042006	g2589	LG1 AUGUSTUS gene 18040834 18042006 0.17 - .	NA	NA	5.87			NA	NA	NA	NA	NA	NA	NA	NA			NA
55897	LG1	18042701	18043896	g2590	LG1 AUGUSTUS gene 18042701 18043896 0.03 + .	NA	NA	5.87			NA	NA	NA	NA	NA	NA	NA	NA			NA
55908	LG1	18044167	18044916	g2591	LG1 AUGUSTUS gene 18044167 18044916 0.09 - .	NA	NA	5.87			NA	NA	NA	NA	NA	NA	NA	NA			NA
55916	LG1	18049691	18050406	g2592	LG1 AUGUSTUS gene 18049691 18050406 0.11 + .	NA	NA	5.87			NA	NA	NA	NA	NA	NA	NA	NA			NA
55927	LG1	18051671	18053856	g2593	PREDICTED: uncharacterized protein LOC104228441 [Nicotiana sylvestris]	NA	NA	5.87			NA	NA	NA	NA	NA	NA	NA	NA			NA
55947	LG1	18058237	18061776	g2594	PREDICTED: uncharacterized protein LOC104242554 [Nicotiana sylvestris]	NA	NA	5.87			NA	NA	NA	NA	NA	NA	NA	NA			AT3G60310.1 | Symbols: | unknown protein; Has 22 Blast hits to 18 proteins in 9 species: Archae - 0; Bacteria - 0; Metazoa - 0; Fungi - 0; Plants - 22; Viruses - 0; Other Eukaryotes - 0 (source: NCBI BLink).
55973	LG1	18065551	18066556	g2595	LG1 AUGUSTUS gene 18065551 18066556 0.14 + .	NA	NA	5.87			NA	NA	NA	NA	NA	NA	NA	NA			NA
55984	LG1	18066611	18067430	g2596	PREDICTED: probable ADP-ribosylation factor GTPase-activating protein AGD6 [Sesamum indicum]	NA	NA	5.87	Putative GTPase activating protein for Arf	Arf GTPase activating protein	NA	NA	GTPase activator activity	NA	NA	NA	NA	NA			AT2G37550.2 | Symbols: ASP1, AGD7 | ARF-GAP domain 7
55992	LG1	18074821	18080583	g2597	PREDICTED: uncharacterized protein LOC104094748 [Nicotiana tomentosiformis]	NA	NA	5.87			NA	NA	NA	NA	NA	NA	NA	NA			AT1G76320.2 | Symbols: FRS4 | FAR1-related sequence 4
56021	LG1	18081259	18082206	g2598	LG1 AUGUSTUS gene 18081259 18082206 0.03 - .	NA	NA	5.87			NA	NA	NA	NA	NA	NA	NA	NA			NA
56030	LG1	18087841	18088689	g2599	LG1 AUGUSTUS gene 18087841 18088689 0.03 + .	NA	NA	5.87			NA	NA	NA	NA	NA	NA	NA	NA			NA
56041	LG1	18090237	18096976	g2600	PREDICTED: WD-40 repeat-containing protein MSI4-like [Nicotiana tomentosiformis]	NA	NA	5.87	WD domain, G-beta repeat	WD40 repeat	NA	NA	protein binding	K10752	RBBP4, HAT2, CAF1, MIS16; histone-binding protein RBBP4	A09140 Cellular Processes	09143 Cell growth and death	04218 Cellular senescence [PATH:ko04218]			AT2G19520.1 | Symbols: FVE, ACG1, MSI4, NFC4, NFC04, ATMSI4 | Transducin family protein / WD-40 repeat family protein
56092	LG1	18104491	18109204	g2601	PREDICTED: uncharacterized protein LOC104246050 [Nicotiana sylvestris]	NA	NA	5.87			NA	NA	NA	NA	NA	NA	NA	NA			NA
57521	LG1	18751392	18756440	g2669	LG1 AUGUSTUS gene 18751392 18756440 0.01 - .	NA	NA	4.93			NA	NA	NA	NA	NA	NA	NA	NA			NA
57532	LG1	18756496	18758760	g2670	LG1 AUGUSTUS gene 18756496 18758760 0.01 - .	NA	NA	4.93			NA	NA	NA	NA	NA	NA	NA	NA			NA
57552	LG1	18759415	18760519	g2671	LG1 AUGUSTUS gene 18759415 18760519 0.01 + .	NA	NA	4.93			NA	NA	NA	NA	NA	NA	NA	NA			NA
57566	LG1	18760884	18764460	g2672	LG1 AUGUSTUS gene 18760884 18764460 0.04 - .	NA	NA	4.93			NA	NA	NA	NA	NA	NA	NA	NA			NA
57581	LG1	18764765	18770600	g2673	LG1 AUGUSTUS gene 18764765 18770600 0.02 + .	NA	NA	4.93			NA	NA	NA	NA	NA	NA	NA	NA			NA
57605	LG1	18775201	18775990	g2674	LG1 AUGUSTUS gene 18775201 18775990 0.16 - .	NA	NA	4.93			NA	NA	NA	NA	NA	NA	NA	NA			NA
57613	LG1	18776785	18782664	g2675	LG1 AUGUSTUS gene 18776785 18782664 0.01 + .	NA	NA	4.93			NA	NA	NA	NA	NA	NA	NA	NA			NA
57629	LG1	18784224	18785200	g2676	LG1 AUGUSTUS gene 18784224 18785200 0.22 - .	NA	NA	4.93			NA	NA	NA	NA	NA	NA	NA	NA			NA
57643	LG1	18797225	18799235	g2677	LG1 AUGUSTUS gene 18797225 18799235 0.05 + .	NA	NA	5.79,4.93			NA	NA	NA	NA	NA	NA	NA	NA			NA
57660	LG1	18799259	18807930	g2678	LG1 AUGUSTUS gene 18799259 18807930 0.01 - .	NA	NA	5.79,4.93			NA	NA	NA	NA	NA	NA	NA	NA			NA
57722	LG1	18814525	18815028	g2679	LG1 AUGUSTUS gene 18814525 18815028 0.15 + .	NA	NA	5.79,4.93			NA	NA	NA	NA	NA	NA	NA	NA			NA
57730	LG1	18818332	18822020	g2680	LG1 AUGUSTUS gene 18818332 18822020 0.01 - .	NA	NA	5.79,4.93			NA	NA	NA	NA	NA	NA	NA	NA			NA
57756	LG1	18823311	18825390	g2681	LG1 AUGUSTUS gene 18823311 18825390 0.05 - .	NA	NA	5.79,4.93			NA	NA	NA	NA	NA	NA	NA	NA			NA
57779	LG1	18825607	18827180	g2682	LG1 AUGUSTUS gene 18825607 18827180 0.07 - .	NA	NA	5.79,4.93			NA	NA	NA	NA	NA	NA	NA	NA			NA
57793	LG1	18828016	18830880	g2683	LG1 AUGUSTUS gene 18828016 18830880 0.02 - .	NA	NA	5.79,4.93			NA	NA	NA	NA	NA	NA	NA	NA			NA
57804	LG1	18833779	18836360	g2684	LG1 AUGUSTUS gene 18833779 18836360 0.01 - .	NA	NA	5.79,4.93			NA	NA	NA	NA	NA	NA	NA	NA			NA
57817	LG1	18839585	18842101	g2685	LG1 AUGUSTUS gene 18839585 18842101 0.02 + .	NA	NA	5.79,4.93			NA	NA	NA	NA	NA	NA	NA	NA			NA
57840	LG1	18853202	18854234	g2686	LG1 AUGUSTUS gene 18853202 18854234 0.01 + .	NA	NA	5.79,4.93	SWIM zinc finger	Zinc finger, SWIM-type	NA	NA	zinc ion binding	NA	NA	NA	NA	NA			AT3G06250.1 | Symbols: FRS7 | FAR1-related sequence 7
57848	LG1	18855192	18857507	g2687	LG1 AUGUSTUS gene 18855192 18857507 0.19 - .	NA	NA	5.79,4.93	Ulp1 protease family, C-terminal catalytic domain	Ulp1 protease family, C-terminal catalytic domain	cysteine-type peptidase activity	NA	proteolysis | cysteine-type peptidase activity	NA	NA	NA	NA	NA			NA
57874	LG1	18861332	18870097	g2688	PREDICTED: pentatricopeptide repeat-containing protein At2g15690-like [Nicotiana tomentosiformis]	NA	NA	5.79,4.93	DYW family of nucleic acid deaminases	DYW domain	NA	NA	zinc ion binding	NA	NA	NA	NA	NA			AT2G15690.1 | Symbols: | Tetratricopeptide repeat (TPR)-like superfamily protein
57907	LG1	18871632	18879902	g2689	LG1 AUGUSTUS gene 18871632 18879902 0.01 + .	NA	NA	5.79,4.93			NA	NA	NA	NA	NA	NA	NA	NA			NA
57923	LG1	18883183	18884807	g2690	LG1 AUGUSTUS gene 18883183 18884807 0.05 - .	NA	NA	5.79,4.93			NA	NA	NA	NA	NA	NA	NA	NA			NA
57932	LG1	18885172	18892019	g2691	LG1 AUGUSTUS gene 18885172 18892019 0.01 + .	NA	NA	5.79,4.93			NA	NA	NA	NA	NA	NA	NA	NA			NA
57956	LG1	18892082	18895251	g2692	PREDICTED: pentatricopeptide repeat-containing protein At2g15690-like [Nicotiana tomentosiformis]	NA	NA	5.79,4.93	DYW family of nucleic acid deaminases	DYW domain	NA	NA	zinc ion binding	NA	NA	NA	NA	NA			AT2G15690.1 | Symbols: | Tetratricopeptide repeat (TPR)-like superfamily protein
57965	LG1	18897072	18900274	g2693	PREDICTED: uncharacterized protein LOC105162013 [Sesamum indicum]	NA	NA	5.79,4.93			NA	NA	NA	NA	NA	NA	NA	NA			AT4G29520.1 | Symbols: | LOCATED IN: endoplasmic reticulum, plasma membrane; EXPRESSED IN: 23 plant structures; EXPRESSED DURING: 14 growth stages; CONTAINS InterPro DOMAIN/s: Saposin B (InterPro:IPR008139); Has 137 Blast hits to 137 proteins in 50 species: Archae - 2; Bacteria - 0; Metazoa - 41; Fungi - 10; Plants - 36; Viruses - 0; Other Eukaryotes - 48 (source: NCBI BLink).
57991	LG1	18901852	18909543	g2694	PREDICTED: zinc finger MYM-type protein 1-like [Nicotiana tomentosiformis]	NA	NA	5.79,4.93			NA	NA	NA	NA	NA	NA	NA	NA			AT3G29638.1 | Symbols: | General transcription factor 2-related zinc finger protein
58023	LG1	18910252	18913077	g2695	LG1 AUGUSTUS gene 18910252 18913077 0.13 + .	NA	NA	5.79,4.93			NA	NA	NA	NA	NA	NA	NA	NA			NA
58035	LG1	18915663	18922057	g2696	Putative retrotransposon protein, identical [Solanum demissum]	NA	NA	5.79,4.93			NA	NA	NA	NA	NA	NA	NA	NA			ATMG00860.1 | Symbols: ORF158 | DNA/RNA polymerases superfamily protein
58058	LG1	18922152	18925231	g2697	PREDICTED: uncharacterized protein LOC101257625 isoform X2 [Solanum lycopersicum]	NA	NA	5.79,4.93			NA	NA	NA	NA	NA	NA	NA	NA			AT4G35560.1 | Symbols: | Transducin/WD40 repeat-like superfamily protein
58087	LG1	18925253	18926467	g2698	PREDICTED: uncharacterized protein LOC102605741 [Solanum tuberosum]	NA	NA	5.79,4.93			NA	NA	NA	NA	NA	NA	NA	NA			NA
58101	LG1	18927161	18928817	g2699	LG1 AUGUSTUS gene 18927161 18928817 0.02 - .	NA	NA	5.79,4.93			NA	NA	NA	NA	NA	NA	NA	NA			NA
58118	LG1	18930452	18935040	g2700	LG1 AUGUSTUS gene 18930452 18935040 0.04 + .	NA	NA	5.79,4.93			NA	NA	NA	NA	NA	NA	NA	NA			NA
58132	LG1	18935337	18936127	g2701	LG1 AUGUSTUS gene 18935337 18936127 0.43 - .	NA	NA	5.79,4.93			NA	NA	NA	NA	NA	NA	NA	NA			NA
58140	LG1	18941137	18947127	g2702	LG1 AUGUSTUS gene 18941137 18947127 0.01 - .	NA	NA	5.79			NA	NA	NA	NA	NA	NA	NA	NA			NA
58158	LG1	18957142	18958856	g2703	LG1 AUGUSTUS gene 18957142 18958856 0.14 + .	NA	NA	5.79			NA	NA	NA	NA	NA	NA	NA	NA			NA
58170	LG1	18959192	18962427	g2704	PREDICTED: uncharacterized protein LOC105172769 [Sesamum indicum]	NA	NA	5.79			NA	NA	NA	NA	NA	NA	NA	NA			NA
58196	LG1	18962482	18963136	g2705	PREDICTED: uncharacterized protein LOC104095702 [Nicotiana tomentosiformis]	NA	NA	5.79			NA	NA	NA	NA	NA	NA	NA	NA			NA
58204	LG1	18968018	18968957	g2706	LG1 AUGUSTUS gene 18968018 18968957 0.02 - .	NA	NA	5.79			NA	NA	NA	NA	NA	NA	NA	NA			NA
58215	LG1	18972572	18974256	g2707	LG1 AUGUSTUS gene 18972572 18974256 0.05 + .	NA	NA	5.79			NA	NA	NA	NA	NA	NA	NA	NA			NA
59191	LG1	19373784	19374274	g2757	LG1 AUGUSTUS gene 19373784 19374274 0.08 - .	NA	NA	4.96			NA	NA	NA	NA	NA	NA	NA	NA			NA
59199	LG1	19376606	19377284	g2758	LG1 AUGUSTUS gene 19376606 19377284 0.22 - .	NA	NA	4.96			NA	NA	NA	NA	NA	NA	NA	NA			NA
59210	LG1	19378266	19382064	g2759	PREDICTED: uncharacterized protein LOC104220870 [Nicotiana sylvestris]	NA	NA	4.96			NA	NA	NA	NA	NA	NA	NA	NA			ATMG00860.1 | Symbols: ORF158 | DNA/RNA polymerases superfamily protein
59227	LG1	19386959	19389584	g2760	LG1 AUGUSTUS gene 19386959 19389584 0.01 - .	NA	NA	4.96			NA	NA	NA	NA	NA	NA	NA	NA			NA
59245	LG1	19390079	19393602	g2761	PREDICTED: protein FAR1-RELATED SEQUENCE 5-like [Solanum tuberosum]	NA	NA	4.96	SWIM zinc finger	Zinc finger, SWIM-type	NA	NA	zinc ion binding	NA	NA	NA	NA	NA			AT4G38180.1 | Symbols: FRS5 | FAR1-related sequence 5
59262	LG1	19393730	19397694	g2762	LG1 AUGUSTUS gene 19393730 19397694 0.04 - .	NA	NA	4.96	Ulp1 protease family, C-terminal catalytic domain	Ulp1 protease family, C-terminal catalytic domain	cysteine-type peptidase activity	NA	proteolysis | cysteine-type peptidase activity	NA	NA	NA	NA	NA			NA
59291	LG1	19398939	19401178	g2763	LG1 AUGUSTUS gene 19398939 19401178 0.26 + .	NA	NA	4.96			NA	NA	NA	NA	NA	NA	NA	NA			NA
59300	LG1	19404010	19408844	g2764	Polyprotein, putative [Solanum demissum]	NA	NA	4.96	hAT family C-terminal dimerisation region	HAT, C-terminal dimerisation domain	NA	NA	protein dimerization activity	NA	NA	NA	NA	NA			AT4G23160.1 | Symbols: CRK8 | cysteine-rich RLK (RECEPTOR-like protein kinase) 8
59323	LG1	19410503	19411234	g2765	LG1 AUGUSTUS gene 19410503 19411234 0.38 - .	NA	NA	4.96			NA	NA	NA	NA	NA	NA	NA	NA			NA
59334	LG1	19426149	19428044	g2766	PREDICTED: uncharacterized protein LOC104114439 [Nicotiana tomentosiformis]	NA	NA	4.96			NA	NA	NA	NA	NA	NA	NA	NA			NA
59346	LG1	19436800	19439124	g2767	PREDICTED: protein ELF4-LIKE 4-like [Nicotiana sylvestris]	NA	NA	4.96			NA	NA	NA	NA	NA	NA	NA	NA			AT1G17455.2 | Symbols: ELF4-L4 | ELF4-like 4
59355	LG1	19440309	19441472	g2768	PREDICTED: superkiller viralicidic activity 2-like 2 [Nicotiana tomentosiformis]	NA	NA	4.96			NA	NA	NA	NA	NA	NA	NA	NA			ATMG01250.1 | Symbols: ORF102 | RNA-directed DNA polymerase (reverse transcriptase)
59372	LG1	19443999	19446380	g2769	LG1 AUGUSTUS gene 19443999 19446380 0.02 + .	NA	NA	4.96			NA	NA	NA	NA	NA	NA	NA	NA			NA
59390	LG1	19449649	19451207	g2770	LG1 AUGUSTUS gene 19449649 19451207 0.1 + .	NA	NA	4.96			NA	NA	NA	NA	NA	NA	NA	NA			NA
59399	LG1	19451510	19462324	g2771	LG1 AUGUSTUS gene 19451510 19462324 0.02 - .	NA	NA	4.96			NA	NA	NA	NA	NA	NA	NA	NA			NA
59429	LG1	19465729	19466615	g2772	PREDICTED: uncharacterized protein LOC104086729 [Nicotiana tomentosiformis]	NA	NA	4.96			NA	NA	NA	NA	NA	NA	NA	NA			NA
59440	LG1	19472459	19474170	g2773	PREDICTED: uncharacterized protein LOC101257487 [Solanum lycopersicum]	NA	NA	4.96			NA	NA	NA	NA	NA	NA	NA	NA			NA
59457	LG1	19474264	19477064	g2774	PREDICTED: uncharacterized protein LOC104228912 [Nicotiana sylvestris]	NA	NA	4.96			NA	NA	NA	NA	NA	NA	NA	NA			ATMG01250.1 | Symbols: ORF102 | RNA-directed DNA polymerase (reverse transcriptase)
59475	LG1	19479678	19482584	g2775	101 kDa heat shock protein [Nicotiana tabacum]	NA	NA	4.96			NA	NA	NA	NA	NA	NA	NA	NA			AT1G74310.1 | Symbols: ATHSP101, HSP101, HOT1 | heat shock protein 101
59495	LG1	19485354	19494524	g2776	PREDICTED: uncharacterized protein LOC105167219 [Sesamum indicum]	NA	NA	4.96			NA	NA	NA	NA	NA	NA	NA	NA			AT4G20520.1 | Symbols: | RNA binding;RNA-directed DNA polymerases
59525	LG1	19497338	19502604	g2777	LG1 AUGUSTUS gene 19497338 19502604 0.01 - .	NA	NA	4.96			NA	NA	NA	NA	NA	NA	NA	NA			NA
59543	LG1	19506286	19515634	g2778	PREDICTED: mediator of RNA polymerase II transcription subunit 20a isoform X2 [Nicotiana sylvestris]	NA	NA	4.96	TATA-binding related factor (TRF) of subunit 20 of Mediator complex	Mediator complex, subunit Med20	NA	NA	transcription coregulator activity | regulation of transcription by RNA polymerase II | mediator complex	K13528	MED20; mediator of RNA polymerase II transcription subunit 20	A09180 Brite Hierarchies	09182 Protein families: genetic information processing	03021 Transcription machinery [BR:ko03021]			AT2G28230.1 | Symbols: | TATA-binding related factor (TRF) of subunit 20 of Mediator complex
59590	LG1	19540399	19541831	g2779	PREDICTED: E3 ubiquitin-protein ligase PUB23-like [Sesamum indicum]	NA	0.29,0.29,0.28	4.96	U-box domain	U box domain	NA	NA	ubiquitin-protein transferase activity | protein ubiquitination	NA	NA	NA	NA	NA			AT2G35930.1 | Symbols: PUB23 | plant U-box 23
59601	LG1	19542038	19544384	g2780	LG1 AUGUSTUS gene 19542038 19544384 0.01 - .	NA	0.29,0.29,0.28	4.96			NA	NA	NA	NA	NA	NA	NA	NA			NA
59633	LG1	19548829	19549564	g2781	PREDICTED: cyclic dof factor 5-like [Nicotiana tomentosiformis]	NA	0.29,0.29,0.28	4.96			NA	NA	NA	NA	NA	NA	NA	NA			NA
59644	LG1	19551899	19553796	g2782	PREDICTED: uncharacterized protein LOC104092696, partial [Nicotiana tomentosiformis]	NA	0.29,0.29,0.29,0.28	4.96			NA	NA	NA	NA	NA	NA	NA	NA			NA
59658	LG1	19562305	19567038	g2783	Polyprotein, putative [Solanum demissum]	NA	0.29,0.29,0.29,0.28	4.96			NA	NA	NA	NA	NA	NA	NA	NA			AT4G23160.1 | Symbols: CRK8 | cysteine-rich RLK (RECEPTOR-like protein kinase) 8
59687	LG1	19575404	19577770	g2784	PREDICTED: 33 kDa ribonucleoprotein, chloroplastic [Sesamum indicum]	NA	0.29,0.29,0.29,0.28	NA	RNA recognition motif. (a.k.a. RRM, RBD, or RNP domain)	RNA recognition motif domain	NA	NA	nucleic acid binding	NA	NA	NA	NA	NA			AT3G52380.1 | Symbols: CP33, PDE322 | chloroplast RNA-binding protein 33
59710	LG1	19579276	19582760	g2785	PREDICTED: pentatricopeptide repeat-containing protein At4g39530 isoform X1 [Nicotiana sylvestris]	NA	0.29,0.29,0.29,0.28	NA			NA	NA	NA	NA	NA	NA	NA	NA			AT4G39530.1 | Symbols: | Tetratricopeptide repeat (TPR)-like superfamily protein
59739	LG1	19585145	19586290	g2786	PREDICTED: cyclic dof factor 5-like [Nicotiana tomentosiformis]	NA	0.29,0.29,0.29,0.28	NA	Dof domain, zinc finger	Zinc finger, Dof-type	NA	NA	DNA binding | regulation of transcription, DNA-templated	NA	NA	NA	NA	NA			AT3G52440.1 | Symbols: | Dof-type zinc finger DNA-binding family protein
59747	LG1	19589935	19592550	g2787	PREDICTED: LOW QUALITY PROTEIN: uncharacterized protein LOC104223244 [Nicotiana sylvestris]	NA	0.29,0.29,0.29,0.28	NA			NA	NA	NA	NA	NA	NA	NA	NA			ATMG00810.1 | Symbols: ORF240B | DNA/RNA polymerases superfamily protein
59779	LG1	19592763	19594220	g2788	PREDICTED: E3 ubiquitin-protein ligase PUB23-like [Nicotiana sylvestris]	NA	0.29,0.29,0.29,0.28	NA	U-box domain	U box domain	NA	NA	ubiquitin-protein transferase activity | protein ubiquitination	NA	NA	NA	NA	NA			AT2G35930.1 | Symbols: PUB23 | plant U-box 23
59787	LG1	19607376	19611180	g2789	PREDICTED: uncharacterized protein LOC104646566 [Solanum lycopersicum]	NA	0.29,0.29,0.29,0.28	NA			NA	NA	NA	NA	NA	NA	NA	NA			ATMG00710.1 | Symbols: ORF120 | Polynucleotidyl transferase, ribonuclease H-like superfamily protein
59808	LG1	19611585	19613496	g2790	LG1 AUGUSTUS gene 19611585 19613496 0.06 + .	NA	0.29,0.29,0.29,0.28	NA			NA	NA	NA	NA	NA	NA	NA	NA			NA
59825	LG1	19615983	19619190	g2791	PREDICTED: protein FAR1-RELATED SEQUENCE 3 [Sesamum indicum]	NA	0.29	NA	SWIM zinc finger	Zinc finger, SWIM-type	NA	NA	zinc ion binding	NA	NA	NA	NA	NA			AT4G38180.1 | Symbols: FRS5 | FAR1-related sequence 5
59852	LG1	19641295	19643820	g2792	PREDICTED: cytokinin dehydrogenase 7 [Nicotiana tomentosiformis]	NA	0.29	NA	Cytokinin dehydrogenase 1, FAD and cytokinin binding; FAD binding domain	Cytokinin dehydrogenase 1, FAD/cytokinin binding domain; FAD linked oxidase, N-terminal	NA	NA	cytokinin metabolic process | cytokinin dehydrogenase activity | flavin adenine dinucleotide binding | oxidation-reduction process	K00279	CKX; cytokinin dehydrogenase [EC:1.5.99.12]	A09100 Metabolism	09109 Metabolism of terpenoids and polyketides	00908 Zeatin biosynthesis [PATH:ko00908]			AT5G21482.1 | Symbols: CKX7, ATCKX5 | cytokinin oxidase 7
61778	LG1	20276192	20279906	g2886	PREDICTED: ATP-dependent 6-phosphofructokinase 6 {ECO:0000255|HAMAP-Rule:MF_03186}-like isoform X1 [Nicotiana tomentosiformis]	NA	NA	5.67	Phosphofructokinase	Phosphofructokinase domain	NA	NA	6-phosphofructokinase activity | glycolytic process	K00850	pfkA, PFK; 6-phosphofructokinase 1 [EC:2.7.1.11]	A09100 Metabolism	09101 Carbohydrate metabolism	00010 Glycolysis / Gluconeogenesis [PATH:ko00010]			AT4G26270.1 | Symbols: PFK3 | phosphofructokinase 3
61822	LG1	20282140	20285087	g2887	PREDICTED: CTP synthase-like isoform X2 [Nicotiana sylvestris]	NA	NA	5.67	CTP synthase N-terminus	CTP synthase, N-terminal	NA	NA	CTP synthase activity | pyrimidine nucleotide biosynthetic process	NA	NA	NA	NA	NA			AT4G20320.2 | Symbols: | CTP synthase family protein
61857	LG1	20290412	20293220	g2888	LG1 AUGUSTUS gene 20290412 20293220 0.01 + .	NA	NA	5.67			NA	NA	NA	NA	NA	NA	NA	NA			NA
61872	LG1	20295622	20296517	g2889	LG1 AUGUSTUS gene 20295622 20296517 0.26 - .	NA	NA	5.67			NA	NA	NA	NA	NA	NA	NA	NA			NA
61883	LG1	20300772	20304468	g2890	PREDICTED: uncharacterized protein LOC104087351 isoform X1 [Nicotiana tomentosiformis]	NA	NA	5.67			NA	NA	NA	NA	NA	NA	NA	NA			NA
61904	LG1	20311050	20315517	g2891	LG1 AUGUSTUS gene 20311050 20315517 0.01 - .	NA	NA	5.67			NA	NA	NA	NA	NA	NA	NA	NA			NA
61925	LG1	20319742	20325490	g2892	PREDICTED: protein FAR1-RELATED SEQUENCE 5-like [Nicotiana sylvestris]	NA	NA	5.67	SWIM zinc finger	Zinc finger, SWIM-type	NA	NA	zinc ion binding	NA	NA	NA	NA	NA			AT4G38170.1 | Symbols: FRS9 | FAR1-related sequence 9
61943	LG1	20325579	20330217	g2893	LG1 AUGUSTUS gene 20325579 20330217 0.05 - .	NA	NA	5.67	Ulp1 protease family, C-terminal catalytic domain	Ulp1 protease family, C-terminal catalytic domain	cysteine-type peptidase activity	NA	proteolysis | cysteine-type peptidase activity	NA	NA	NA	NA	NA			NA
61978	LG1	20335903	20342947	g2894	LG1 AUGUSTUS gene 20335903 20342947 0.01 - .	NA	NA	5.67			NA	NA	NA	NA	NA	NA	NA	NA			NA
61990	LG1	20343203	20345577	g2895	PREDICTED: uncharacterized protein LOC104228121 [Nicotiana sylvestris]	NA	NA	5.67			NA	NA	NA	NA	NA	NA	NA	NA			ATMG01250.1 | Symbols: ORF102 | RNA-directed DNA polymerase (reverse transcriptase)
62013	LG1	20345842	20353891	g2896	PREDICTED: protein ELF4-LIKE 4-like [Nicotiana sylvestris]	NA	NA	5.67			NA	NA	NA	NA	NA	NA	NA	NA			AT1G17455.2 | Symbols: ELF4-L4 | ELF4-like 4
62023	LG1	20356343	20357687	g2897	LG1 AUGUSTUS gene 20356343 20357687 0.09 - .	NA	NA	5.67			NA	NA	NA	NA	NA	NA	NA	NA			NA
62037	LG1	20361465	20364417	g2898	PREDICTED: uncharacterized protein LOC101268537 [Solanum lycopersicum]	NA	NA	5.67			NA	NA	NA	NA	NA	NA	NA	NA			NA
62052	LG1	20365479	20369207	g2899	putative polyprotein [Solanum lycopersicum]	NA	NA	5.67			NA	NA	NA	NA	NA	NA	NA	NA			AT4G23160.1 | Symbols: CRK8 | cysteine-rich RLK (RECEPTOR-like protein kinase) 8
62070	LG1	20369907	20371127	g2900	PREDICTED: uncharacterized protein LOC104233667 [Nicotiana sylvestris]	NA	NA	5.67			NA	NA	NA	NA	NA	NA	NA	NA			NA
62087	LG1	20376012	20377111	g2901	LG1 AUGUSTUS gene 20376012 20377111 0.08 + .	NA	NA	5.67			NA	NA	NA	NA	NA	NA	NA	NA			NA
62101	LG1	20382173	20388807	g2902	PREDICTED: LOW QUALITY PROTEIN: uncharacterized protein LOC104084743 [Nicotiana tomentosiformis]	NA	NA	5.67			NA	NA	NA	NA	NA	NA	NA	NA			ATMG00860.1 | Symbols: ORF158 | DNA/RNA polymerases superfamily protein
62139	LG1	20391115	20391987	g2903	LG1 AUGUSTUS gene 20391115 20391987 0.1 - .	NA	NA	5.67			NA	NA	NA	NA	NA	NA	NA	NA			NA
62150	LG1	20396092	20399785	g2904	PREDICTED: uncharacterized protein At1g10890 [Nicotiana tomentosiformis]	NA	NA	5.67			NA	NA	NA	NA	NA	NA	NA	NA			NA
62164	LG1	20414022	20415055	g2905	LG1 AUGUSTUS gene 20414022 20415055 0.11 + .	NA	NA	5.67			NA	NA	NA	NA	NA	NA	NA	NA			NA
62175	LG1	20416997	20417857	g2906	PREDICTED: 50S ribosomal protein L18, chloroplastic-like [Nicotiana tomentosiformis]	NA	NA	5.67	Ribosomal L18 of archaea, bacteria, mitoch. and chloroplast	Ribosomal protein L18	NA	NA	structural constituent of ribosome | ribosome | translation	NA	NA	NA	NA	NA			AT5G27820.1 | Symbols: | Ribosomal L18p/L5e family protein
62184	LG1	20422232	20426292	g2907	LG1 AUGUSTUS gene 20422232 20426292 0.02 + .	NA	NA	5.67			NA	NA	NA	NA	NA	NA	NA	NA			AT5G35530.1 | Symbols: | Ribosomal protein S3 family protein
62207	LG1	20426592	20430320	g2908	PREDICTED: uncharacterized protein LOC104241008 [Nicotiana sylvestris]	NA	NA	5.67			NA	NA	NA	NA	NA	NA	NA	NA			NA
62219	LG1	20438113	20439497	g2909	PREDICTED: putative F-box protein At1g53550 [Nicotiana tomentosiformis]	NA	NA	5.67			NA	NA	NA	NA	NA	NA	NA	NA			AT1G64290.1 | Symbols: | F-box protein-related
62230	LG1	20442534	20443607	g2910	LG1 AUGUSTUS gene 20442534 20443607 0.19 - .	NA	NA	5.67			NA	NA	NA	NA	NA	NA	NA	NA			NA
62247	LG1	20447272	20448464	g2911	LG1 AUGUSTUS gene 20447272 20448464 0.1 + .	NA	NA	5.67			NA	NA	NA	NA	NA	NA	NA	NA			NA
62258	LG1	20453621	20455417	g2912	PREDICTED: uncharacterized protein LOC102598429 [Solanum tuberosum]	NA	NA	5.67			NA	NA	NA	NA	NA	NA	NA	NA			NA
62278	LG1	20458789	20459547	g2913	PREDICTED: F-box protein At5g49610-like [Nicotiana tomentosiformis]	NA	NA	5.67			NA	NA	NA	NA	NA	NA	NA	NA			NA
66058	LG1	21904465	21908193	g3097	PREDICTED: chloroplastic group IIA intron splicing facilitator CRS1, chloroplastic [Solanum lycopersicum]	NA	NA	5.24	CRS1 / YhbY (CRM) domain	RNA-binding, CRM domain	NA	NA	RNA binding	NA	NA	NA	NA	NA			AT4G29750.1 | Symbols: | CRS1 / YhbY (CRM) domain-containing protein
66093	LG1	21911193	21916863	g3098	PREDICTED: uncharacterized protein LOC104221303 [Nicotiana sylvestris]	NA	NA	5.24,4.72			NA	NA	NA	NA	NA	NA	NA	NA			ATMG00310.1 | Symbols: ORF154 | RNA-directed DNA polymerase (reverse transcriptase)-related family protein
66120	LG1	21922198	21928916	g3099	PREDICTED: WD-40 repeat-containing protein MSI4-like [Nicotiana sylvestris]	NA	NA	5.24,4.72	WD domain, G-beta repeat	WD40 repeat	NA	NA	protein binding	K10752	RBBP4, HAT2, CAF1, MIS16; histone-binding protein RBBP4	A09140 Cellular Processes	09143 Cell growth and death	04218 Cellular senescence [PATH:ko04218]			AT2G19520.1 | Symbols: FVE, ACG1, MSI4, NFC4, NFC04, ATMSI4 | Transducin family protein / WD-40 repeat family protein
66171	LG1	21929993	21932323	g3100	LG1 AUGUSTUS gene 21929993 21932323 0.12 - .	NA	NA	5.24,4.72			NA	NA	NA	NA	NA	NA	NA	NA			NA
66185	LG1	21937384	21937953	g3101	LG1 AUGUSTUS gene 21937384 21937953 0.01 - .	NA	NA	5.24,4.72			NA	NA	NA	NA	NA	NA	NA	NA			NA
66196	LG1	21951028	21952743	g3102	PREDICTED: uncharacterized protein LOC105179705 [Sesamum indicum]	NA	NA	5.24,4.72			NA	NA	NA	NA	NA	NA	NA	NA			AT4G29090.1 | Symbols: | Ribonuclease H-like superfamily protein
66207	LG1	21952888	21956471	g3103	PREDICTED: uncharacterized protein LOC102596531 isoform X2 [Solanum tuberosum]	NA	NA	5.24,4.72			NA	NA	NA	NA	NA	NA	NA	NA			AT3G60310.1 | Symbols: | unknown protein; Has 22 Blast hits to 18 proteins in 9 species: Archae - 0; Bacteria - 0; Metazoa - 0; Fungi - 0; Plants - 22; Viruses - 0; Other Eukaryotes - 0 (source: NCBI BLink).
66230	LG1	21966714	21967403	g3104	LG1 AUGUSTUS gene 21966714 21967403 0.23 - .	NA	NA	5.24,4.72			NA	NA	NA	NA	NA	NA	NA	NA			NA
66241	LG1	21978278	21979513	g3105	LG1 AUGUSTUS gene 21978278 21979513 0.08 + .	NA	NA	5.24,5.04,4.72			NA	NA	NA	NA	NA	NA	NA	NA			NA
66253	LG1	21979802	21980833	g3106	PREDICTED: LOW QUALITY PROTEIN: uncharacterized protein LOC104223244 [Nicotiana sylvestris]	NA	NA	5.24,5.04,4.72			NA	NA	NA	NA	NA	NA	NA	NA			ATMG00810.1 | Symbols: ORF240B | DNA/RNA polymerases superfamily protein
66267	LG1	21986767	21993083	g3107	PREDICTED: uncharacterized protein LOC102596531 isoform X2 [Solanum tuberosum]	NA	NA	5.24,5.04,4.72			NA	NA	NA	NA	NA	NA	NA	NA			AT3G60310.1 | Symbols: | unknown protein; Has 22 Blast hits to 18 proteins in 9 species: Archae - 0; Bacteria - 0; Metazoa - 0; Fungi - 0; Plants - 22; Viruses - 0; Other Eukaryotes - 0 (source: NCBI BLink).
66288	LG1	22001468	22007187	g3108	PREDICTED: uncharacterized protein LOC104243175 [Nicotiana sylvestris]	NA	NA	5.24,5.04,4.72			NA	NA	NA	NA	NA	NA	NA	NA			NA
66326	LG1	22011326	22017363	g3109	PREDICTED: WD-40 repeat-containing protein MSI4-like [Nicotiana sylvestris]	NA	NA	5.24,5.04,4.72	WD domain, G-beta repeat	WD40 repeat	NA	NA	protein binding	NA	NA	NA	NA	NA			AT2G19520.1 | Symbols: FVE, ACG1, MSI4, NFC4, NFC04, ATMSI4 | Transducin family protein / WD-40 repeat family protein
66373	LG1	22017598	22019003	g3110	LG1 AUGUSTUS gene 22017598 22019003 0.04 - .	NA	NA	5.24,5.04,4.72			NA	NA	NA	NA	NA	NA	NA	NA			NA
66387	LG1	22034000	22034529	g3111	LG1 AUGUSTUS gene 22034000 22034529 0.19 - .	NA	NA	5.24,5.04,4.72			NA	NA	NA	NA	NA	NA	NA	NA			NA
66395	LG1	22034644	22038007	g3112	PREDICTED: uncharacterized protein LOC104229761 [Nicotiana sylvestris]	NA	NA	5.24,5.04,4.72			NA	NA	NA	NA	NA	NA	NA	NA			NA
66427	LG1	22043684	22050624	g3113	PREDICTED: 3-phosphoinositide-dependent protein kinase 2-like isoform X2 [Nicotiana tomentosiformis]	NA	NA	5.24,5.04,4.72	Protein kinase domain	Protein kinase domain	NA	NA	protein kinase activity | ATP binding | protein phosphorylation	NA	NA	NA	NA	NA			AT3G10540.1 | Symbols: | 3-phosphoinositide-dependent protein kinase
66471	LG1	22053264	22059329	g3114	PREDICTED: uncharacterized protein LOC101249672 [Solanum lycopersicum]	NA	NA	5.24,5.04,4.72			NA	NA	NA	NA	NA	NA	NA	NA			AT4G23160.1 | Symbols: CRK8 | cysteine-rich RLK (RECEPTOR-like protein kinase) 8
66491	LG1	22064244	22068218	g3115	PREDICTED: zinc finger BED domain-containing protein RICESLEEPER 1-like [Sesamum indicum]	NA	NA	5.24,5.04,4.72			NA	NA	NA	NA	NA	NA	NA	NA			AT3G42170.1 | Symbols: | BED zinc finger ;hAT family dimerisation domain
66509	LG1	22075504	22076180	g3116	PREDICTED: uncharacterized protein LOC102601595 [Solanum tuberosum]	NA	NA	5.24,5.04,4.72			NA	NA	NA	NA	NA	NA	NA	NA			NA
66517	LG1	22082144	22086465	g3117	PREDICTED: LOW QUALITY PROTEIN: bark storage protein A-like [Sesamum indicum]	NA	NA	5.04,4.72	Phosphorylase superfamily	Nucleoside phosphorylase domain	NA	NA	catalytic activity | nucleoside metabolic process	NA	NA	NA	NA	NA			AT4G24350.1 | Symbols: | Phosphorylase superfamily protein
66534	LG1	22094284	22103887	g3118	PREDICTED: bark storage protein A-like [Nicotiana tomentosiformis]	NA	NA	5.04			NA	NA	NA	NA	NA	NA	NA	NA			AT4G24350.1 | Symbols: | Phosphorylase superfamily protein
66547	LG1	22107504	22118443	g3119	PREDICTED: dihydrolipoyllysine-residue acetyltransferase component 1 of pyruvate dehydrogenase complex, mitochondrial isoform X1 [Nicotiana sylvestris]	NA	NA	5.04	2-oxoacid dehydrogenases acyltransferase (catalytic domain)	2-oxoacid dehydrogenase acyltransferase, catalytic domain	NA	NA	transferase activity, transferring acyl groups	K00627	DLAT, aceF, pdhC; pyruvate dehydrogenase E2 component (dihydrolipoamide acetyltransferase) [EC:2.3.1.12]	A09100 Metabolism	09101 Carbohydrate metabolism	00010 Glycolysis / Gluconeogenesis [PATH:ko00010]			AT3G52200.1 | Symbols: LTA3 | Dihydrolipoamide acetyltransferase, long form protein
66621	LG1	22121643	22130069	g3120	LG1 AUGUSTUS gene 22121643 22130069 0.01 - .	NA	NA	5.04			NA	NA	NA	NA	NA	NA	NA	NA			NA
66645	LG1	22131794	22133505	g3121	PREDICTED: uncharacterized protein LOC104111771 [Nicotiana tomentosiformis]	NA	NA	5.04			NA	NA	NA	NA	NA	NA	NA	NA			NA
66659	LG1	22134639	22137859	g3122	LG1 AUGUSTUS gene 22134639 22137859 0.01 - .	NA	NA	5.04			NA	NA	NA	NA	NA	NA	NA	NA			NA
66685	LG1	22138863	22140259	g3123	PREDICTED: uncharacterized protein LOC105172985 [Sesamum indicum]	NA	NA	5.04			NA	NA	NA	NA	NA	NA	NA	NA			NA
66702	LG1	22142094	22145529	g3124	Mutator transposable element, putative [Solanum demissum]	NA	NA	5.04			NA	NA	NA	NA	NA	NA	NA	NA			NA
66725	LG1	22150384	22153423	g3125	PREDICTED: probable histone chaperone ASF1A [Sesamum indicum]	NA	NA	5.04	ASF1 like histone chaperone	Histone chaperone ASF1-like	chromosome organization	NA	nucleus | chromatin assembly or disassembly	K10753	ASF1; histone chaperone ASF1	A09180 Brite Hierarchies	09182 Protein families: genetic information processing	03036 Chromosome and associated proteins [BR:ko03036]			AT1G66740.1 | Symbols: AtSP7, SP7, SGA2, ASF1A | ASF1 like histone chaperone
66739	LG1	22154955	22163409	g3126	PREDICTED: uncharacterized protein LOC102590501 [Solanum tuberosum]	NA	NA	5.04	NB-ARC domain	NB-ARC	NA	NA	ADP binding	NA	NA	NA	NA	NA			AT3G46530.1 | Symbols: RPP13 | NB-ARC domain-containing disease resistance protein
66760	LG1	22168155	22168879	g3127	PREDICTED: probable receptor-like protein kinase At1g67000 isoform X2 [Solanum lycopersicum]	NA	NA	5.04	Protein kinase domain	Protein kinase domain	NA	NA	protein kinase activity | ATP binding | protein phosphorylation	NA	NA	NA	NA	NA			AT5G39020.1 | Symbols: | Malectin/receptor-like protein kinase family protein
67258	LG1	22448836	22450270	g3156	LG1 AUGUSTUS gene 22448836 22450270 0.47 - .	NA	NA	6.17			NA	NA	NA	NA	NA	NA	NA	NA			NA
67269	LG1	22463515	22471714	g3157	LG1 AUGUSTUS gene 22463515 22471714 0.01 + .	NA	NA	6.17			NA	NA	NA	NA	NA	NA	NA	NA			NA
67293	LG1	22473635	22477975	g3158	LG1 AUGUSTUS gene 22473635 22477975 0.03 + .	NA	NA	6.17			NA	NA	NA	NA	NA	NA	NA	NA			NA
67316	LG1	22479912	22483490	g3159	PREDICTED: (-)-germacrene D synthase-like [Nicotiana tomentosiformis]	NA	NA	6.17	Terpene synthase family, metal binding domain; Terpene synthase, N-terminal domain	Terpene synthase, metal-binding domain; Terpene synthase, N-terminal domain	NA	NA	magnesium ion binding | terpene synthase activity | lyase activity	K15803	GERD; (-)-germacrene D synthase [EC:4.2.3.75]	A09100 Metabolism	09109 Metabolism of terpenoids and polyketides	00909 Sesquiterpenoid and triterpenoid biosynthesis [PATH:ko00909]			AT5G23960.2 | Symbols: TPS21 | terpene synthase 21
67340	LG1	22489905	22498082	g3160	PREDICTED: uncharacterized protein LOC104238251 [Nicotiana sylvestris]	NA	NA	6.17	Integrase core domain	Integrase, catalytic core	DNA integration	NA	DNA integration	NA	NA	NA	NA	NA			ATMG00750.1 | Symbols: ORF119 | GAG/POL/ENV polyprotein
67376	LG1	22500815	22503068	g3161	LG1 AUGUSTUS gene 22500815 22503068 0.03 + .	NA	NA	6.17			NA	NA	NA	NA	NA	NA	NA	NA			NA
67391	LG1	22504376	22505290	g3162	LG1 AUGUSTUS gene 22504376 22505290 0.07 - .	NA	NA	6.17			NA	NA	NA	NA	NA	NA	NA	NA			NA
67402	LG1	22506255	22508484	g3163	PREDICTED: uncharacterized protein LOC105157450 [Sesamum indicum]	NA	NA	6.17			NA	NA	NA	NA	NA	NA	NA	NA			NA
67411	LG1	22509844	22510700	g3164	PREDICTED: auxin-binding protein ABP19a-like [Sesamum indicum]	NA	NA	6.17			NA	NA	NA	NA	NA	NA	NA	NA			AT5G20630.1 | Symbols: GLP3, GLP3A, GLP3B, ATGER3, GER3 | germin 3
67419	LG1	22517805	22520227	g3165	LG1 AUGUSTUS gene 22517805 22520227 0.09 + .	NA	NA	6.17			NA	NA	NA	NA	NA	NA	NA	NA			NA
67439	LG1	22525415	22526348	g3166	PREDICTED: auxin-binding protein ABP19a-like [Sesamum indicum]	NA	NA	6.17			NA	NA	NA	NA	NA	NA	NA	NA			AT5G20630.1 | Symbols: GLP3, GLP3A, GLP3B, ATGER3, GER3 | germin 3
67447	LG1	22538385	22541510	g3167	PREDICTED: uncharacterized protein LOC104242524 [Nicotiana sylvestris]	NA	NA	6.17			NA	NA	NA	NA	NA	NA	NA	NA			NA
67464	LG1	22543825	22545043	g3168	PREDICTED: probable calcium-binding protein CML25 [Nicotiana tomentosiformis]	NA	NA	6.17	EF-hand domain pair	EF-hand domain	NA	NA	calcium ion binding	NA	NA	NA	NA	NA			AT1G24620.1 | Symbols: | EF hand calcium-binding protein family
67475	LG1	22545797	22549060	g3169	PREDICTED: uncharacterized protein LOC104084953 [Nicotiana tomentosiformis]	NA	NA	6.17			NA	NA	NA	NA	NA	NA	NA	NA			NA
67484	LG1	22561342	22564584	g3170	PREDICTED: mannan endo-1,4-beta-mannosidase 2-like [Nicotiana tomentosiformis]	NA	NA	6.17			NA	NA	NA	NA	NA	NA	NA	NA			AT2G20680.1 | Symbols: MAN2, AtMAN2 | Glycosyl hydrolase superfamily protein
67505	LG1	22566644	22569347	g3171	PREDICTED: (-)-germacrene D synthase-like [Nicotiana tomentosiformis]	NA	NA	6.17	Terpene synthase, N-terminal domain; Terpene synthase family, metal binding domain	Terpene synthase, N-terminal domain; Terpene synthase, metal-binding domain	NA	NA	terpene synthase activity | lyase activity	NA	NA	NA	NA	NA			AT3G14490.1 | Symbols: | Terpenoid cyclases/Protein prenyltransferases superfamily protein
67531	LG1	22601932	22607287	g3172	LG1 AUGUSTUS gene 22601932 22607287 0.01 - .	NA	NA	6.17			NA	NA	NA	NA	NA	NA	NA	NA			NA
67550	LG1	22607581	22610007	g3173	LG1 AUGUSTUS gene 22607581 22610007 0.01 - .	NA	NA	6.17			NA	NA	NA	NA	NA	NA	NA	NA			NA
67573	LG1	22614972	22616788	g3174	PREDICTED: subtilisin-like protease [Solanum lycopersicum]	NA	NA	6.17	Subtilase family	Peptidase S8/S53 domain	NA	NA	proteolysis | serine-type peptidase activity	NA	NA	NA	NA	NA			AT2G05920.1 | Symbols: | Subtilase family protein
67770	LG1	22696602	22697435	g3185	LG1 AUGUSTUS gene 22696602 22697435 0.01 + .	NA	0.3,0.28	NA			NA	NA	NA	NA	NA	NA	NA	NA			NA
67781	LG1	22707159	22712197	g3186	PREDICTED: putative late blight resistance protein homolog R1A-10 isoform X1 [Nicotiana sylvestris]	NA	0.31,0.3,0.28	NA	NB-ARC domain	NB-ARC	NA	NA	ADP binding	NA	NA	NA	NA	NA			AT3G46530.1 | Symbols: RPP13 | NB-ARC domain-containing disease resistance protein
67799	LG1	22712802	22713577	g3187	LG1 AUGUSTUS gene 22712802 22713577 0.13 - .	NA	0.31,0.31,0.3,0.28	NA			NA	NA	NA	NA	NA	NA	NA	NA			NA
67807	LG1	22718432	22721033	g3188	LG1 AUGUSTUS gene 22718432 22721033 0.11 + .	NA	0.31,0.31,0.3,0.28	NA			NA	NA	NA	NA	NA	NA	NA	NA			NA
67815	LG1	22722102	22722715	g3189	LG1 AUGUSTUS gene 22722102 22722715 0.14 + .	NA	0.31,0.31,0.31,0.3,0.28	NA			NA	NA	NA	NA	NA	NA	NA	NA			NA
67823	LG1	22727762	22728941	g3190	LG1 AUGUSTUS gene 22727762 22728941 0.05 + .	NA	0.31,0.31,0.31,0.3,0.28	NA			NA	NA	NA	NA	NA	NA	NA	NA			NA
67834	LG1	22744854	22745504	g3191	LG1 AUGUSTUS gene 22744854 22745504 0.07 - .	NA	0.31,0.31,0.31,0.31,0.31,0.3,0.28	NA			NA	NA	NA	NA	NA	NA	NA	NA			NA
67842	LG1	22752079	22757306	g3192	PREDICTED: uncharacterized protein LOC104647898 [Solanum lycopersicum]	NA	0.31,0.31,0.31,0.31,0.31,0.3,0.28,0.28	NA			NA	NA	NA	NA	NA	NA	NA	NA			AT4G29090.1 | Symbols: | Ribonuclease H-like superfamily protein
67886	LG1	22762759	22766376	g3193	PREDICTED: MOB kinase activator-like 1 [Nicotiana tomentosiformis]	NA	0.31,0.31,0.31,0.31,0.31,0.3,0.28,0.28	NA			NA	NA	NA	NA	NA	NA	NA	NA			AT5G45550.1 | Symbols: | Mob1/phocein family protein
67910	LG1	22769359	22771790	g3194	PREDICTED: MOB kinase activator-like 1 [Nicotiana tomentosiformis]	NA	0.31,0.31,0.31,0.31,0.31,0.3,0.28	NA			NA	NA	NA	NA	NA	NA	NA	NA			AT5G45550.1 | Symbols: | Mob1/phocein family protein
67927	LG1	22774638	22782914	g3195	PREDICTED: uncharacterized protein At1g04910 isoform X1 [Nicotiana sylvestris]	NA	0.31,0.31,0.31,0.31,0.31,0.28	8.4			NA	NA	NA	NA	NA	NA	NA	NA			AT5G35570.1 | Symbols: | O-fucosyltransferase family protein
67977	LG1	22795757	22796954	g3196	LG1 AUGUSTUS gene 22795757 22796954 0.02 - .	NA	0.31,0.28	8.4			NA	NA	NA	NA	NA	NA	NA	NA			NA
67991	LG1	22828026	22832644	g3197	PREDICTED: uncharacterized protein LOC102580380 [Solanum tuberosum]	NA	0.28	8.4			NA	NA	NA	NA	NA	NA	NA	NA			NA
68003	LG1	22839599	22840241	g3198	PREDICTED: uncharacterized protein LOC104110593 [Nicotiana tomentosiformis]	NA	0.28	8.4			NA	NA	NA	NA	NA	NA	NA	NA			NA
68012	LG1	22844396	22846004	g3199	Polyprotein, putative [Solanum demissum]	NA	0.28	8.4			NA	NA	NA	NA	NA	NA	NA	NA			NA
68026	LG1	22856329	22859484	g3200	PREDICTED: zinc finger BED domain-containing protein RICESLEEPER 1-like [Sesamum indicum]	NA	NA	8.4	Domain of unknown function (DUF4413); hAT family C-terminal dimerisation region	hAT-like transposase, RNase-H fold; HAT, C-terminal dimerisation domain	NA	NA	DNA binding	NA	NA	NA	NA	NA			AT3G42170.1 | Symbols: | BED zinc finger ;hAT family dimerisation domain
68046	LG1	22859589	22861649	g3201	LG1 AUGUSTUS gene 22859589 22861649 0.01 + .	NA	NA	8.4			NA	NA	NA	NA	NA	NA	NA	NA			NA
68063	LG1	22864507	22867314	g3202	PREDICTED: uncharacterized protein LOC104232507 [Nicotiana sylvestris]	NA	NA	8.4			NA	NA	NA	NA	NA	NA	NA	NA			AT4G23160.1 | Symbols: CRK8 | cysteine-rich RLK (RECEPTOR-like protein kinase) 8
68083	LG1	22868799	22871807	g3203	PREDICTED: zinc finger BED domain-containing protein RICESLEEPER 2-like [Solanum lycopersicum]	NA	NA	8.4	Domain of unknown function (DUF4413)	hAT-like transposase, RNase-H fold	NA	NA	DNA binding	NA	NA	NA	NA	NA			AT3G42170.1 | Symbols: | BED zinc finger ;hAT family dimerisation domain
68109	LG1	22872409	22877141	g3204	PREDICTED: uncharacterized protein LOC105167219 [Sesamum indicum]	NA	NA	8.4			NA	NA	NA	NA	NA	NA	NA	NA			AT4G20520.1 | Symbols: | RNA binding;RNA-directed DNA polymerases
68127	LG1	22877819	22878235	g3205	LG1 AUGUSTUS gene 22877819 22878235 0.32 + .	NA	NA	8.4			NA	NA	NA	NA	NA	NA	NA	NA			NA
68135	LG1	22882089	22883245	g3206	PREDICTED: uncharacterized protein LOC104107339 [Nicotiana tomentosiformis]	NA	NA	8.4			NA	NA	NA	NA	NA	NA	NA	NA			NA
68149	LG1	22883459	22886521	g3207	PREDICTED: zinc finger BED domain-containing protein RICESLEEPER 1-like [Sesamum indicum]	NA	NA	8.4	hAT family C-terminal dimerisation region	HAT, C-terminal dimerisation domain	NA	NA	protein dimerization activity	NA	NA	NA	NA	NA			AT3G42170.1 | Symbols: | BED zinc finger ;hAT family dimerisation domain
68173	LG1	22887149	22889640	g3208	LG1 AUGUSTUS gene 22887149 22889640 0.11 + .	NA	NA	8.4			NA	NA	NA	NA	NA	NA	NA	NA			NA
68186	LG1	22889849	22892610	g3209	PREDICTED: zinc finger BED domain-containing protein RICESLEEPER 2-like [Nicotiana sylvestris]	NA	NA	8.4			NA	NA	NA	NA	NA	NA	NA	NA			AT3G42170.1 | Symbols: | BED zinc finger ;hAT family dimerisation domain
68202	LG1	22895597	22897644	g3210	LG1 AUGUSTUS gene 22895597 22897644 0.03 - .	NA	NA	8.4			NA	NA	NA	NA	NA	NA	NA	NA			NA
68216	LG1	22908300	22908756	g3211	LG1 AUGUSTUS gene 22908300 22908756 0.2 - .	NA	NA	8.4			NA	NA	NA	NA	NA	NA	NA	NA			NA
68224	LG1	22912471	22920941	g3212	PREDICTED: uncharacterized protein At1g04910 [Nicotiana tomentosiformis]	NA	NA	8.4,5.88			NA	NA	NA	NA	NA	NA	NA	NA			AT5G35570.1 | Symbols: | O-fucosyltransferase family protein
68274	LG1	22924161	22925071	g3213	LG1 AUGUSTUS gene 22924161 22925071 0.12 + .	NA	NA	8.4,5.88			NA	NA	NA	NA	NA	NA	NA	NA			NA
68282	LG1	22926916	22929766	g3214	PREDICTED: RING-box protein 1a isoform X1 [Nicotiana tomentosiformis]	NA	NA	8.4,5.88			NA	NA	NA	NA	NA	NA	NA	NA			NA
68305	LG1	22939101	22940676	g3215	PREDICTED: G2/mitotic-specific cyclin-2-like [Sesamum indicum]	NA	NA	8.4,5.88	SWIB/MDM2 domain	SWIB/MDM2 domain	NA	NA	protein binding	NA	NA	NA	NA	NA			AT1G76310.1 | Symbols: CYCB2;4 | CYCLIN B2;4
68319	LG1	22949614	22950316	g3216	PREDICTED: calvin cycle protein CP12-1, chloroplastic-like [Sesamum indicum]	NA	NA	8.4,5.88			NA	NA	NA	NA	NA	NA	NA	NA			AT3G62410.1 | Symbols: CP12-2, CP12 | CP12 domain-containing protein 2
68327	LG1	22952501	22953238	g3217	LG1 AUGUSTUS gene 22952501 22953238 0.09 + .	NA	NA	8.4,5.88			NA	NA	NA	NA	NA	NA	NA	NA			NA
68335	LG1	22961522	22964176	g3218	LG1 AUGUSTUS gene 22961522 22964176 0.08 - .	NA	NA	8.4,5.88			NA	NA	NA	NA	NA	NA	NA	NA			NA
68347	LG1	22965006	22966056	g3219	PREDICTED: uncharacterized protein LOC105179298 [Sesamum indicum]	NA	NA	5.88			NA	NA	NA	NA	NA	NA	NA	NA			NA
68358	LG1	22968331	22972551	g3220	unnamed protein product [Nicotiana tabacum]	NA	NA	5.88	Papain family cysteine protease	Peptidase C1A, papain C-terminal	cysteine-type peptidase activity	NA	proteolysis | cysteine-type peptidase activity	K01366	CTSH; cathepsin H [EC:3.4.22.16]	A09140 Cellular Processes	09141 Transport and catabolism	04142 Lysosome [PATH:ko04142]			AT5G60360.1 | Symbols: SAG2, AALP, ALP | aleurain-like protease
68387	LG1	22974361	22976389	g3221	PREDICTED: (-)-alpha-terpineol synthase-like isoform X1 [Solanum tuberosum]	NA	NA	5.88			NA	NA	NA	NA	NA	NA	NA	NA			NA
68402	LG1	22985701	22992384	g3222	myosin XI [Nicotiana tabacum]	NA	NA	5.88			NA	NA	NA	NA	NA	NA	NA	NA			AT5G20490.2 | Symbols: XIK, ATXIK, XI-17 | Myosin family protein with Dil domain
68465	LG1	22996214	22997966	g3223	LG1 AUGUSTUS gene 22996214 22997966 0.22 - .	NA	NA	5.88			NA	NA	NA	NA	NA	NA	NA	NA			NA
68479	LG1	23003265	23005166	g3224	PREDICTED: uncharacterized protein LOC104213897 [Nicotiana sylvestris]	1.54	NA	5.88			NA	NA	NA	NA	NA	NA	NA	NA			AT3G45200.1 | Symbols: | unknown protein; BEST Arabidopsis thaliana protein match is: unknown protein (TAIR:AT1G64870.1); Has 95 Blast hits to 91 proteins in 10 species: Archae - 0; Bacteria - 0; Metazoa - 0; Fungi - 0; Plants - 95; Viruses - 0; Other Eukaryotes - 0 (source: NCBI BLink).
68488	LG1	23008227	23008886	g3225	PREDICTED: uncharacterized protein DDB_G0271670-like [Solanum tuberosum]	1.54	NA	5.88			NA	NA	NA	NA	NA	NA	NA	NA			NA
68496	LG1	23010701	23011413	g3226	LG1 AUGUSTUS gene 23010701 23011413 0.05 + .	1.61,1.54	NA	5.88			NA	NA	NA	NA	NA	NA	NA	NA			NA
68507	LG1	23013039	23014436	g3227	PREDICTED: uncharacterized protein LOC104213897 [Nicotiana sylvestris]	1.61,1.54	NA	5.88			NA	NA	NA	NA	NA	NA	NA	NA			AT5G13620.1 | Symbols: | unknown protein; BEST Arabidopsis thaliana protein match is: unknown protein (TAIR:AT1G49290.1); Has 1807 Blast hits to 1807 proteins in 277 species: Archae - 0; Bacteria - 0; Metazoa - 736; Fungi - 347; Plants - 385; Viruses - 0; Other Eukaryotes - 339 (source: NCBI BLink).
68519	LG1	23017648	23018466	g3228	PREDICTED: uncharacterized protein LOC104120664 [Nicotiana tomentosiformis]	1.61,1.54	NA	5.88			NA	NA	NA	NA	NA	NA	NA	NA			NA
68527	LG1	23018951	23021721	g3229	Polyprotein, putative [Solanum demissum]	1.61,1.54	NA	5.88			NA	NA	NA	NA	NA	NA	NA	NA			AT4G00980.1 | Symbols: | zinc knuckle (CCHC-type) family protein
68548	LG1	23022091	23026531	g3230	PREDICTED: uncharacterized protein LOC105171234 [Sesamum indicum]	1.61,1.54,1.49	NA	5.88			NA	NA	NA	NA	NA	NA	NA	NA			NA
68560	LG1	23027541	23034088	g3231	Polyprotein, putative [Solanum demissum]	1.61,1.54,1.49	NA	5.88			NA	NA	NA	NA	NA	NA	NA	NA			AT4G23160.1 | Symbols: CRK8 | cysteine-rich RLK (RECEPTOR-like protein kinase) 8
68575	LG1	23035441	23039860	g3232	PREDICTED: uncharacterized protein LOC104212000 [Nicotiana sylvestris]	1.61,1.54,1.49	NA	5.88			NA	NA	NA	NA	NA	NA	NA	NA			NA
68587	LG1	23041131	23042332	g3233	LG1 AUGUSTUS gene 23041131 23042332 0.11 + .	1.61,1.54,1.49	NA	5.88			NA	NA	NA	NA	NA	NA	NA	NA			NA
68596	LG1	23050692	23055816	g3234	LG1 AUGUSTUS gene 23050692 23055816 0.01 - .	1.61,1.54,1.49	NA	5.88			NA	NA	NA	NA	NA	NA	NA	NA			NA
68632	LG1	23063628	23065905	g3235	PREDICTED: uncharacterized protein LOC104249954 [Nicotiana sylvestris]	1.61,1.54,1.49	NA	5.88			NA	NA	NA	NA	NA	NA	NA	NA			NA
68658	LG1	23068566	23070405	g3236	LG1 AUGUSTUS gene 23068566 23070405 0.1 - .	1.61,1.54,1.49	NA	5.88			NA	NA	NA	NA	NA	NA	NA	NA			NA
68670	LG1	23070473	23074825	g3237	PREDICTED: uncharacterized protein LOC104212000 [Nicotiana sylvestris]	1.61,1.54,1.49	NA	5.88			NA	NA	NA	NA	NA	NA	NA	NA			AT1G06340.1 | Symbols: | Plant Tudor-like protein
68679	LG1	23078669	23082235	g3238	Polyprotein, putative [Solanum demissum]	1.61,1.54,1.49	NA	5.88			NA	NA	NA	NA	NA	NA	NA	NA			AT4G00980.1 | Symbols: | zinc knuckle (CCHC-type) family protein
68700	LG1	23082840	23083652	g3239	PREDICTED: uncharacterized protein LOC104120664 [Nicotiana tomentosiformis]	1.61,1.54,1.49	NA	5.88			NA	NA	NA	NA	NA	NA	NA	NA			NA
68708	LG1	23086260	23087656	g3240	PREDICTED: uncharacterized protein LOC104213897 [Nicotiana sylvestris]	1.61,1.54,1.49	NA	5.88			NA	NA	NA	NA	NA	NA	NA	NA			AT3G45200.1 | Symbols: | unknown protein; BEST Arabidopsis thaliana protein match is: unknown protein (TAIR:AT1G64870.1); Has 95 Blast hits to 91 proteins in 10 species: Archae - 0; Bacteria - 0; Metazoa - 0; Fungi - 0; Plants - 95; Viruses - 0; Other Eukaryotes - 0 (source: NCBI BLink).
68720	LG1	23089542	23089945	g3241	LG1 AUGUSTUS gene 23089542 23089945 0.18 - .	1.61,1.54,1.49	NA	5.88			NA	NA	NA	NA	NA	NA	NA	NA			NA
68728	LG1	23090830	23096207	g3242	Polyprotein, putative [Solanum demissum]	1.61,1.54,1.49	NA	5.88			NA	NA	NA	NA	NA	NA	NA	NA			AT4G23160.1 | Symbols: CRK8 | cysteine-rich RLK (RECEPTOR-like protein kinase) 8
68754	LG1	23096350	23098539	g3243	PREDICTED: zinc finger BED domain-containing protein RICESLEEPER 1-like, partial [Nicotiana sylvestris]	1.61,1.49	NA	5.88	Domain of unknown function (DUF4413)	hAT-like transposase, RNase-H fold	NA	NA	DNA binding	NA	NA	NA	NA	NA			AT3G42170.1 | Symbols: | BED zinc finger ;hAT family dimerisation domain
68763	LG1	23102860	23103520	g3244	PREDICTED: uncharacterized protein DDB_G0271670-like [Solanum tuberosum]	1.49	NA	5.88			NA	NA	NA	NA	NA	NA	NA	NA			NA
68771	LG1	23106510	23115781	g3245	PREDICTED: uncharacterized protein LOC105179637 [Sesamum indicum]	1.49	NA	NA	Reverse transcriptase-like	Ribonuclease H domain	NA	NA	nucleic acid binding | RNA-DNA hybrid ribonuclease activity	NA	NA	NA	NA	NA			AT4G20520.1 | Symbols: | RNA binding;RNA-directed DNA polymerases
70694	LG1	23827012	23831215	g3332	PREDICTED: uncharacterized protein LOC104116452 [Nicotiana tomentosiformis]	NA	NA	4.93			NA	NA	NA	NA	NA	NA	NA	NA			AT3G52240.1 | Symbols: | unknown protein; Has 220 Blast hits to 193 proteins in 66 species: Archae - 0; Bacteria - 15; Metazoa - 53; Fungi - 33; Plants - 66; Viruses - 0; Other Eukaryotes - 53 (source: NCBI BLink).
70723	LG1	23832989	23835525	g3333	PREDICTED: zinc finger BED domain-containing protein RICESLEEPER 1-like isoform X1 [Sesamum indicum]	NA	NA	4.93	hAT family C-terminal dimerisation region	HAT, C-terminal dimerisation domain	NA	NA	protein dimerization activity	NA	NA	NA	NA	NA			AT3G42170.1 | Symbols: | BED zinc finger ;hAT family dimerisation domain
70746	LG1	23843720	23845581	g3334	PREDICTED: 40S ribosomal protein S27-2 [Nicotiana tomentosiformis]	NA	NA	4.93	Ribosomal protein S27	Ribosomal protein S27e	NA	NA	structural constituent of ribosome | ribosome | translation	NA	NA	NA	NA	NA			AT3G61110.1 | Symbols: ARS27A, RS27A | ribosomal protein S27
70763	LG1	23848770	23853548	g3335	PREDICTED: uncharacterized protein LOC104114340 [Nicotiana tomentosiformis]	NA	NA	4.93			NA	NA	NA	NA	NA	NA	NA	NA			AT3G52900.1 | Symbols: | Family of unknown function (DUF662)
70784	LG1	23854810	23855898	g3336	PREDICTED: 40S ribosomal protein S27-2 [Nicotiana tomentosiformis]	NA	NA	4.93	Ribosomal protein S27	Ribosomal protein S27e	NA	NA	structural constituent of ribosome | ribosome | translation	K02978	RP-S27e, RPS27; small subunit ribosomal protein S27e	A09120 Genetic Information Processing	09122 Translation	03010 Ribosome [PATH:ko03010]			AT3G61110.1 | Symbols: ARS27A, RS27A | ribosomal protein S27
70801	LG1	23860990	23861834	g3337	LG1 AUGUSTUS gene 23860990 23861834 0.01 + .	NA	NA	4.93			NA	NA	NA	NA	NA	NA	NA	NA			NA
70812	LG1	23866360	23870941	g3338	PREDICTED: putative late blight resistance protein homolog R1A-10 isoform X3 [Nicotiana tomentosiformis]	NA	NA	4.93	NB-ARC domain	NB-ARC	NA	NA	ADP binding	NA	NA	NA	NA	NA			AT3G46530.1 | Symbols: RPP13 | NB-ARC domain-containing disease resistance protein
70839	LG1	23875255	23880795	g3339	PREDICTED: uncharacterized protein LOC104110514 [Nicotiana tomentosiformis]	NA	NA	4.93			NA	NA	NA	NA	NA	NA	NA	NA			ATMG00860.1 | Symbols: ORF158 | DNA/RNA polymerases superfamily protein
70869	LG1	23881198	23889455	g3340	LG1 AUGUSTUS gene 23881198 23889455 0.01 - .	NA	NA	4.93			NA	NA	NA	NA	NA	NA	NA	NA			NA
70884	LG1	23892590	23897972	g3341	PREDICTED: putative dual specificity protein phosphatase DSP8 [Sesamum indicum]	NA	NA	4.93			NA	NA	NA	NA	NA	NA	NA	NA			AT5G56610.1 | Symbols: | Phosphotyrosine protein phosphatases superfamily protein
70913	LG1	23902747	23907835	g3342	PREDICTED: uncharacterized protein LOC104120122 [Nicotiana tomentosiformis]	NA	NA	4.93			NA	NA	NA	NA	NA	NA	NA	NA			ATMG00860.1 | Symbols: ORF158 | DNA/RNA polymerases superfamily protein
70931	LG1	23912310	23913542	g3343	LG1 AUGUSTUS gene 23912310 23913542 0.04 + .	NA	NA	4.93			NA	NA	NA	NA	NA	NA	NA	NA			NA
70948	LG1	23923990	23926631	g3344	PREDICTED: uncharacterized protein LOC105173330 [Sesamum indicum]	NA	NA	4.93			NA	NA	NA	NA	NA	NA	NA	NA			NA
70980	LG1	23928226	23930045	g3345	LG1 AUGUSTUS gene 23928226 23930045 0.02 - .	NA	NA	4.93			NA	NA	NA	NA	NA	NA	NA	NA			NA
70994	LG1	23942917	23946682	g3346	PREDICTED: thioredoxin-like [Nicotiana tomentosiformis]	NA	NA	4.93			NA	NA	NA	NA	NA	NA	NA	NA			NA
71020	LG1	23951397	23954633	g3347	PREDICTED: uncharacterized protein LOC104214157, partial [Nicotiana sylvestris]	NA	NA	4.93			NA	NA	NA	NA	NA	NA	NA	NA			NA
71044	LG1	23967448	23968062	g3348	PREDICTED: uncharacterized protein LOC105177526 [Sesamum indicum]	NA	NA	4.93			NA	NA	NA	NA	NA	NA	NA	NA			AT5G08060.1 | Symbols: | unknown protein; FUNCTIONS IN: molecular_function unknown; INVOLVED IN: biological_process unknown; LOCATED IN: mitochondrion; EXPRESSED IN: 24 plant structures; EXPRESSED DURING: 16 growth stages; Has 42 Blast hits to 42 proteins in 17 species: Archae - 0; Bacteria - 0; Metazoa - 0; Fungi - 0; Plants - 41; Viruses - 0; Other Eukaryotes - 1 (source: NCBI BLink).
71052	LG1	23971277	23973225	g3349	PREDICTED: U-box domain-containing protein 32 isoform X1 [Sesamum indicum]	NA	NA	4.93			NA	NA	NA	NA	NA	NA	NA	NA			AT3G49060.2 | Symbols: | U-box domain-containing protein kinase family protein
71066	LG1	23975570	23977042	g3350	LG1 AUGUSTUS gene 23975570 23977042 0.04 - .	NA	NA	4.93			NA	NA	NA	NA	NA	NA	NA	NA			NA
71078	LG1	23977402	23981542	g3351	PREDICTED: uncharacterized protein LOC104084888 [Nicotiana tomentosiformis]	NA	NA	4.93			NA	NA	NA	NA	NA	NA	NA	NA			AT4G23160.1 | Symbols: CRK8 | cysteine-rich RLK (RECEPTOR-like protein kinase) 8
71091	LG1	23981707	23982274	g3352	LG1 AUGUSTUS gene 23981707 23982274 0.08 + .	NA	NA	4.93			NA	NA	NA	NA	NA	NA	NA	NA			NA
71099	LG1	23983388	23985102	g3353	PREDICTED: uncharacterized protein LOC104242829 [Nicotiana sylvestris]	NA	NA	4.93			NA	NA	NA	NA	NA	NA	NA	NA			NA
71110	LG1	23986297	23987160	g3354	LG1 AUGUSTUS gene 23986297 23987160 0.25 + .	NA	NA	4.93			NA	NA	NA	NA	NA	NA	NA	NA			NA
71121	LG1	23987668	23988772	g3355	LG1 AUGUSTUS gene 23987668 23988772 0.2 - .	NA	NA	4.93			NA	NA	NA	NA	NA	NA	NA	NA			NA
71138	LG1	23993317	23995658	g3356	LG1 AUGUSTUS gene 23993317 23995658 0.01 + .	NA	NA	5.51,4.93			NA	NA	NA	NA	NA	NA	NA	NA			NA
71147	LG1	23998457	24000058	g3357	PREDICTED: crocetin glucoside glucosyltransferase-like [Nicotiana tomentosiformis]	NA	NA	5.51,4.93	UDP-glucoronosyl and UDP-glucosyl transferase	UDP-glucuronosyl/UDP-glucosyltransferase	NA	NA	UDP-glycosyltransferase activity	NA	NA	NA	NA	NA			NA
71155	LG1	24001487	24005812	g3358	Polyprotein, putative [Solanum demissum]	NA	NA	5.51,4.93			NA	NA	NA	NA	NA	NA	NA	NA			AT4G23160.1 | Symbols: CRK8 | cysteine-rich RLK (RECEPTOR-like protein kinase) 8
71193	LG1	24007427	24011321	g3359	PREDICTED: FKBP12-interacting protein of 37 kDa, partial [Sesamum indicum]	NA	NA	5.51,4.93			NA	NA	NA	NA	NA	NA	NA	NA			AT1G69170.1 | Symbols: | Squamosa promoter-binding protein-like (SBP domain) transcription factor family protein
71208	LG1	24012657	24014583	g3360	PREDICTED: uncharacterized protein LOC104646029 [Solanum lycopersicum]	NA	NA	5.51,4.93			NA	NA	NA	NA	NA	NA	NA	NA			NA
71225	LG1	24014857	24016906	g3361	Polyprotein, putative [Solanum demissum]	NA	NA	5.51			NA	NA	NA	NA	NA	NA	NA	NA			AT4G23160.1 | Symbols: CRK8 | cysteine-rich RLK (RECEPTOR-like protein kinase) 8
71249	LG1	24023592	24026592	g3362	PREDICTED: uncharacterized protein LOC102599840 [Solanum tuberosum]	NA	NA	5.51			NA	NA	NA	NA	NA	NA	NA	NA			NA
71269	LG1	24028187	24032819	g3363	PREDICTED: uncharacterized protein LOC104247571 [Nicotiana sylvestris]	NA	NA	5.51			NA	NA	NA	NA	NA	NA	NA	NA			NA
71295	LG1	24039323	24040232	g3364	PREDICTED: transcription factor bHLH95-like [Nicotiana sylvestris]	NA	NA	5.51	Helix-loop-helix DNA-binding domain	Myc-type, basic helix-loop-helix (bHLH) domain	NA	NA	protein dimerization activity	NA	NA	NA	NA	NA			AT1G49770.1 | Symbols: RGE1, ZOU | basic helix-loop-helix (bHLH) DNA-binding superfamily protein
71306	LG1	24042937	24047806	g3365	PREDICTED: probable LRR receptor-like serine/threonine-protein kinase At4g08850 [Nicotiana tomentosiformis]	NA	NA	5.51	Leucine rich repeat; Protein kinase domain	Leucine-rich repeat; Protein kinase domain	NA	NA	protein binding	NA	NA	NA	NA	NA			AT4G08850.1 | Symbols: | Leucine-rich repeat receptor-like protein kinase family protein
71327	LG1	24051627	24056466	g3366	PREDICTED: uncharacterized protein LOC104644607 [Solanum lycopersicum]	NA	NA	5.51	Integrase core domain	Integrase, catalytic core	DNA integration	NA	DNA integration	NA	NA	NA	NA	NA			AT4G23160.1 | Symbols: CRK8 | cysteine-rich RLK (RECEPTOR-like protein kinase) 8
71348	LG1	24056953	24058992	g3367	PREDICTED: inactive protein RESTRICTED TEV MOVEMENT 2-like [Nicotiana sylvestris]	NA	NA	5.51			NA	NA	NA	NA	NA	NA	NA	NA			AT2G27140.1 | Symbols: | HSP20-like chaperones superfamily protein
71362	LG1	24062014	24065282	g3368	PREDICTED: uncharacterized protein LOC101255138 isoform X2 [Solanum lycopersicum]	NA	NA	5.51	SWIM zinc finger	Zinc finger, SWIM-type	NA	NA	zinc ion binding	NA	NA	NA	NA	NA			AT1G64260.1 | Symbols: | MuDR family transposase
71374	LG1	24070367	24071891	g3369	PREDICTED: LRR receptor-like serine/threonine-protein kinase GSO1 [Nicotiana sylvestris]	NA	NA	5.51	Leucine rich repeat	Leucine-rich repeat	NA	NA	protein binding	NA	NA	NA	NA	NA			AT2G01820.1 | Symbols: | Leucine-rich repeat protein kinase family protein
71385	LG1	24076499	24079152	g3370	PREDICTED: uncharacterized protein LOC105173268 [Sesamum indicum]	NA	NA	5.51			NA	NA	NA	NA	NA	NA	NA	NA			NA
71400	LG1	24079634	24082022	g3371	PREDICTED: LOW QUALITY PROTEIN: uncharacterized protein LOC105178967 [Sesamum indicum]	NA	NA	5.51			NA	NA	NA	NA	NA	NA	NA	NA			ATMG00860.1 | Symbols: ORF158 | DNA/RNA polymerases superfamily protein
71414	LG1	24082407	24089428	g3372	PREDICTED: alpha-glucosidase [Nicotiana tomentosiformis]	NA	NA	5.51	Glycosyl hydrolases family 31	Glycoside hydrolase family 31	NA	NA	hydrolase activity, hydrolyzing O-glycosyl compounds | carbohydrate metabolic process	NA	NA	NA	NA	NA			AT5G11720.1 | Symbols: | Glycosyl hydrolases family 31 protein
71441	LG1	24093527	24098194	g3373	PREDICTED: R3H domain-containing protein 2-like [Solanum lycopersicum]	NA	NA	5.51	R3H domain	R3H domain	NA	NA	nucleic acid binding	NA	NA	NA	NA	NA			AT3G56680.1 | Symbols: | Single-stranded nucleic acid binding R3H protein
71458	LG1	24099397	24099918	g3374	LG1 AUGUSTUS gene 24099397 24099918 0.55 + .	NA	NA	5.51			NA	NA	NA	NA	NA	NA	NA	NA			NA
71466	LG1	24103191	24104572	g3375	PREDICTED: alpha-glucosidase-like [Nicotiana sylvestris]	NA	NA	5.51			NA	NA	NA	NA	NA	NA	NA	NA			AT5G11720.1 | Symbols: | Glycosyl hydrolases family 31 protein
71480	LG1	24106453	24111792	g3376	PREDICTED: putative receptor-like protein kinase At3g47110-like [Solanum tuberosum]	NA	NA	5.51	Protein tyrosine and serine/threonine kinase; Leucine rich repeat	Serine-threonine/tyrosine-protein kinase, catalytic domain; Leucine-rich repeat	NA	NA	protein kinase activity | protein phosphorylation	NA	NA	NA	NA	NA			AT3G47570.1 | Symbols: | Leucine-rich repeat protein kinase family protein
71495	LG1	24113521	24117572	g3377	Polyprotein, putative [Solanum demissum]	NA	NA	5.51	Integrase core domain; Zinc knuckle	Integrase, catalytic core; Zinc finger, CCHC-type	DNA integration	NA	DNA integration	NA	NA	NA	NA	NA			AT4G23160.1 | Symbols: CRK8 | cysteine-rich RLK (RECEPTOR-like protein kinase) 8
71512	LG1	24118568	24121242	g3378	PREDICTED: putative receptor-like protein kinase At3g47110 isoform X1 [Nicotiana tomentosiformis]	NA	NA	5.51	Leucine rich repeat; Protein tyrosine and serine/threonine kinase	Leucine-rich repeat; Serine-threonine/tyrosine-protein kinase, catalytic domain	NA	NA	protein binding	NA	NA	NA	NA	NA			AT3G47570.1 | Symbols: | Leucine-rich repeat protein kinase family protein
71532	LG1	24127874	24130981	g3379	PREDICTED: alpha-glucosidase-like [Nicotiana sylvestris]	NA	NA	5.51	Glycosyl hydrolases family 31	Glycoside hydrolase family 31	NA	NA	hydrolase activity, hydrolyzing O-glycosyl compounds | carbohydrate metabolic process	NA	NA	NA	NA	NA			AT5G11720.1 | Symbols: | Glycosyl hydrolases family 31 protein
71549	LG1	24137213	24146951	g3380	PREDICTED: zinc finger BED domain-containing protein RICESLEEPER 1-like [Sesamum indicum]	NA	NA	5.51	hAT family C-terminal dimerisation region	HAT, C-terminal dimerisation domain	NA	NA	protein dimerization activity	NA	NA	NA	NA	NA			AT3G42170.1 | Symbols: | BED zinc finger ;hAT family dimerisation domain
71573	LG1	24150406	24153503	g3381	PREDICTED: alpha-glucosidase-like [Nicotiana sylvestris]	NA	NA	5.51	Glycosyl hydrolases family 31	Glycoside hydrolase family 31	NA	NA	hydrolase activity, hydrolyzing O-glycosyl compounds | carbohydrate metabolic process	K01187	malZ; alpha-glucosidase [EC:3.2.1.20]	A09100 Metabolism	09101 Carbohydrate metabolism	00052 Galactose metabolism [PATH:ko00052]			AT5G11720.1 | Symbols: | Glycosyl hydrolases family 31 protein
71590	LG1	24165316	24168797	g3382	PREDICTED: alpha-glucosidase-like [Nicotiana sylvestris]	NA	NA	5.51	Glycosyl hydrolases family 31	Glycoside hydrolase family 31	NA	NA	hydrolase activity, hydrolyzing O-glycosyl compounds | carbohydrate metabolic process	NA	NA	NA	NA	NA			AT5G11720.1 | Symbols: | Glycosyl hydrolases family 31 protein
75600	LG1	25624003	25634957	g3569	PREDICTED: guanine nucleotide-binding protein subunit gamma 3 [Nicotiana tomentosiformis]	NA	NA	5.45	GGL domain	G-protein gamma-like domain	NA	NA	G protein-coupled receptor signaling pathway	NA	NA	NA	NA	NA			AT5G20635.1 | Symbols: | FUNCTIONS IN: molecular_function unknown; INVOLVED IN: biological_process unknown; LOCATED IN: keratin filament, chloroplast; CONTAINS InterPro DOMAIN/s: Keratin, high sulphur B2 protein (InterPro:IPR002494); Has 6153 Blast hits to 2882 proteins in 265 species: Archae - 6; Bacteria - 47; Metazoa - 4777; Fungi - 68; Plants - 187; Viruses - 30; Other Eukaryotes - 1038 (sour…
75621	LG1	25635034	25639218	g3570	PREDICTED: subtilisin-like protease [Solanum lycopersicum]	NA	NA	5.45	Subtilase family	Peptidase S8/S53 domain	NA	NA	proteolysis | serine-type peptidase activity	NA	NA	NA	NA	NA			AT2G05920.1 | Symbols: | Subtilase family protein
75641	LG1	25641545	25643248	g3571	LG1 AUGUSTUS gene 25641545 25643248 0.26 - .	NA	NA	5.45,5.03			NA	NA	NA	NA	NA	NA	NA	NA			NA
75650	LG1	25647525	25649028	g3572	LG1 AUGUSTUS gene 25647525 25649028 0.02 - .	NA	NA	5.45,5.03			NA	NA	NA	NA	NA	NA	NA	NA			NA
75659	LG1	25651533	25658808	g3573	LG1 AUGUSTUS gene 25651533 25658808 0.01 + .	NA	NA	5.45,5.03			NA	NA	NA	NA	NA	NA	NA	NA			NA
75673	LG1	25677663	25682796	g3574	LG1 AUGUSTUS gene 25677663 25682796 0.01 + .	NA	NA	5.45,5.03			NA	NA	NA	NA	NA	NA	NA	NA			NA
75705	LG1	25682914	25698708	g3575	PREDICTED: zinc finger BED domain-containing protein RICESLEEPER 1-like isoform X1 [Sesamum indicum]	NA	NA	5.45,5.03	hAT family C-terminal dimerisation region; Domain of unknown function (DUF4413)	HAT, C-terminal dimerisation domain; hAT-like transposase, RNase-H fold	NA	NA	protein dimerization activity	NA	NA	NA	NA	NA			AT3G42170.1 | Symbols: | BED zinc finger ;hAT family dimerisation domain
75741	LG1	25701333	25704735	g3576	PREDICTED: probable protein phosphatase 2C 9 isoform X1 [Nicotiana sylvestris]	NA	NA	5.45,5.03	Protein phosphatase 2C	PPM-type phosphatase domain	NA	NA	phosphatase activity	K17506	PPM1L, PP2CE; protein phosphatase 1L [EC:3.1.3.16]	A09180 Brite Hierarchies	09181 Protein families: metabolism	01009 Protein phosphatases and associated proteins [BR:ko01009]			AT1G34750.1 | Symbols: | Protein phosphatase 2C family protein
75765	LG1	25709177	25710031	g3577	LG1 AUGUSTUS gene 25709177 25710031 0.39 + .	NA	NA	5.45,5.03			NA	NA	NA	NA	NA	NA	NA	NA			NA
75776	LG1	25717146	25721522	g3578	PREDICTED: zinc finger BED domain-containing protein RICESLEEPER 2-like [Sesamum indicum]	NA	NA	5.45,5.03	Domain of unknown function (DUF4413); hAT family C-terminal dimerisation region	hAT-like transposase, RNase-H fold; HAT, C-terminal dimerisation domain	NA	NA	DNA binding	NA	NA	NA	NA	NA			AT3G42170.1 | Symbols: | BED zinc finger ;hAT family dimerisation domain
75796	LG1	25724807	25725724	g3579	PREDICTED: monoacylglycerol lipase ABHD6-like isoform X1 [Nicotiana tomentosiformis]	NA	NA	5.45,5.03			NA	NA	NA	NA	NA	NA	NA	NA			AT5G09430.1 | Symbols: | alpha/beta-Hydrolases superfamily protein
75804	LG1	25732827	25734625	g3580	LG1 AUGUSTUS gene 25732827 25734625 0.05 + .	NA	NA	5.45,5.03			NA	NA	NA	NA	NA	NA	NA	NA			NA
75818	LG1	25735807	25739472	g3581	PREDICTED: 14-3-3 protein 7 isoform X1 [Sesamum indicum]	NA	NA	5.45,5.03			NA	NA	NA	K06630	YWHAE; 14-3-3 protein epsilon	A09130 Environmental Information Processing	09132 Signal transduction	04011 MAPK signaling pathway - yeast [PATH:ko04011]			AT1G34760.1 | Symbols: GRF11, GF14 OMICRON, RHS5 | general regulatory factor 11
75842	LG1	25740007	25746845	g3582	PREDICTED: uncharacterized protein LOC104647097 [Solanum lycopersicum]	NA	NA	5.45,5.03	Reverse transcriptase-like	Ribonuclease H domain	NA	NA	nucleic acid binding | RNA-DNA hybrid ribonuclease activity	NA	NA	NA	NA	NA			AT3G01410.2 | Symbols: | Polynucleotidyl transferase, ribonuclease H-like superfamily protein
75880	LG1	25747618	25749682	g3583	LG1 AUGUSTUS gene 25747618 25749682 0.04 - .	NA	NA	5.45,5.03			NA	NA	NA	NA	NA	NA	NA	NA			NA
75899	LG1	25754571	25756082	g3584	stigma/style ABC transporter [Nicotiana tabacum]	NA	NA	5.45,5.03	ABC-2 type transporter; ABC transporter	ABC-2 type transporter; ABC transporter-like	NA	NA	membrane	NA	NA	NA	NA	NA			AT5G13580.1 | Symbols: | ABC-2 type transporter family protein
75907	LG1	25761129	25765322	g3585	LG1 AUGUSTUS gene 25761129 25765322 0.09 - .	NA	NA	5.45,5.03			NA	NA	NA	NA	NA	NA	NA	NA			NA
75925	LG1	25773999	25777202	g3586	PREDICTED: chalcone--flavonone isomerase [Sesamum indicum]	NA	NA	5.45,5.03	Chalcone-flavanone isomerase	Chalcone isomerase	NA	NA	intramolecular lyase activity	NA	NA	NA	NA	NA			AT3G55120.1 | Symbols: TT5, A11, CFI | Chalcone-flavanone isomerase family protein
75942	LG1	25781317	25782247	g3587	LG1 AUGUSTUS gene 25781317 25782247 0.06 + .	NA	NA	5.45,5.03			NA	NA	NA	NA	NA	NA	NA	NA			NA
75954	LG1	25785250	25785772	g3588	LG1 AUGUSTUS gene 25785250 25785772 0.19 - .	NA	NA	5.45,5.03			NA	NA	NA	NA	NA	NA	NA	NA			NA
75962	LG1	25790047	25793629	g3589	PREDICTED: probable pectate lyase 4 [Nicotiana tomentosiformis]	NA	NA	5.45,5.03			NA	NA	NA	K01728	pel; pectate lyase [EC:4.2.2.2]	A09100 Metabolism	09101 Carbohydrate metabolism	00040 Pentose and glucuronate interconversions [PATH:ko00040]			AT3G55140.1 | Symbols: | Pectin lyase-like superfamily protein
75982	LG1	25793642	25795762	g3590	PREDICTED: exocyst complex component EXO70A1-like [Nicotiana sylvestris]	NA	NA	5.45,5.03	Exo70 exocyst complex subunit	Exocyst complex component Exo70	NA	NA	exocyst | exocytosis	K07195	EXOC7, EXO70; exocyst complex component 7	A09150 Organismal Systems	09152 Endocrine system	04910 Insulin signaling pathway [PATH:ko04910]			AT2G39380.1 | Symbols: ATEXO70H2, EXO70H2 | exocyst subunit exo70 family protein H2
75993	LG1	25801067	25805342	g3591	PREDICTED: uncharacterized protein LOC102591431 [Solanum tuberosum]	NA	NA	5.45,5.03			NA	NA	NA	NA	NA	NA	NA	NA			NA
76020	LG1	25808325	25812282	g3592	PREDICTED: uncharacterized protein LOC101249672 [Solanum lycopersicum]	NA	NA	5.45,5.03			NA	NA	NA	NA	NA	NA	NA	NA			ATMG00810.1 | Symbols: ORF240B | DNA/RNA polymerases superfamily protein
76049	LG1	25816167	25818432	g3593	PREDICTED: 60S ribosomal protein L35-like [Nicotiana tomentosiformis]	NA	NA	5.03			NA	NA	NA	NA	NA	NA	NA	NA			AT2G39390.1 | Symbols: | Ribosomal L29 family protein
76063	LG1	25826701	25829002	g3594	PREDICTED: 60S ribosomal protein L35 [Nicotiana sylvestris]	NA	NA	5.03	Ribosomal L29 protein	Ribosomal protein L29/L35	NA	NA	structural constituent of ribosome | ribosome | translation	NA	NA	NA	NA	NA			AT5G02610.1 | Symbols: | Ribosomal L29 family protein
76080	LG1	25831717	25837068	g3595	PREDICTED: caffeoylshikimate esterase-like [Nicotiana sylvestris]	NA	NA	5.03			NA	NA	NA	NA	NA	NA	NA	NA			AT2G39420.1 | Symbols: | alpha/beta-Hydrolases superfamily protein
78006	LG1	26682771	26691899	g3704	PREDICTED: pumilio homolog 1-like isoform X1 [Nicotiana tomentosiformis]	NA	NA	5	Pumilio-family RNA binding repeat	Pumilio RNA-binding repeat	NA	NA	RNA binding	K17943	PUM; pumilio RNA-binding family	A09160 Human Diseases	09164 Neurodegenerative disease	05017 Spinocerebellar ataxia [PATH:ko05017]			AT2G29190.2 | Symbols: PUM2 | pumilio 2
78045	LG1	26692241	26698211	g3705	PREDICTED: uncharacterized protein LOC104092884 isoform X2 [Nicotiana tomentosiformis]	NA	NA	5	hAT family C-terminal dimerisation region; BED zinc finger	HAT, C-terminal dimerisation domain; Zinc finger, BED-type	NA	NA	protein dimerization activity	NA	NA	NA	NA	NA			AT4G15020.2 | Symbols: | hAT transposon superfamily
78071	LG1	26698905	26701146	g3706	PREDICTED: L-type lectin-domain containing receptor kinase S.4-like [Nicotiana tomentosiformis]	NA	NA	5	Protein kinase domain; Legume lectin domain	Protein kinase domain; Legume lectin domain	NA	NA	protein kinase activity | ATP binding | protein phosphorylation	NA	NA	NA	NA	NA			AT3G55550.1 | Symbols: | Concanavalin A-like lectin protein kinase family protein
78079	LG1	26719018	26722186	g3707	LG1 AUGUSTUS gene 26719018 26722186 0.04 - .	NA	NA	5	Reverse transcriptase-like	Ribonuclease H domain	NA	NA	nucleic acid binding | RNA-DNA hybrid ribonuclease activity	NA	NA	NA	NA	NA			NA
78091	LG1	26733725	26742186	g3708	unnamed protein product, partial [Nicotiana tabacum]	NA	NA	5			NA	NA	NA	NA	NA	NA	NA	NA			AT1G74260.1 | Symbols: PUR4 | purine biosynthesis 4
78125	LG1	26754911	26757076	g3709	PREDICTED: protein phosphatase 2C 37 [Solanum lycopersicum]	NA	NA	5	Protein phosphatase 2C	PPM-type phosphatase domain	NA	NA	phosphatase activity	NA	NA	NA	NA	NA			AT1G07430.1 | Symbols: HAI2 | highly ABA-induced PP2C gene 2
78142	LG1	26760381	26771535	g3710	PREDICTED: poly(A) RNA polymerase cid11 [Nicotiana sylvestris]	NA	NA	5			NA	NA	NA	NA	NA	NA	NA	NA			AT2G39740.1 | Symbols: | Nucleotidyltransferase family protein
78172	LG1	26772901	26776470	g3711	PREDICTED: protein XAP5 CIRCADIAN TIMEKEEPER [Solanum lycopersicum]	NA	NA	5	XAP5, circadian clock regulator	XAP5 protein	NA	NA	nucleus	NA	NA	NA	NA	NA			AT2G21150.1 | Symbols: XCT | XAP5 family protein
78214	LG1	26777581	26783317	g3712	PREDICTED: BTB/POZ and MATH domain-containing protein 3-like isoform X1 [Nicotiana tomentosiformis]	NA	NA	5	BTB/POZ domain	BTB/POZ domain	NA	NA	protein binding	NA	NA	NA	NA	NA			AT2G39760.1 | Symbols: ATBPM3, BPM3 | BTB/POZ/MATH-domains containing protein
78237	LG1	26784741	26791125	g3713	PREDICTED: ultraviolet-B receptor UVR8 isoform X2 [Sesamum indicum]	NA	NA	5			NA	NA	NA	NA	NA	NA	NA	NA			AT3G55580.1 | Symbols: | Regulator of chromosome condensation (RCC1) family protein
78284	LG1	26791861	26793882	g3714	LG1 AUGUSTUS gene 26791861 26793882 0.02 + .	NA	NA	5			NA	NA	NA	NA	NA	NA	NA	NA			NA
78293	LG1	26794003	26799116	g3715	LG1 AUGUSTUS gene 26794003 26799116 0.01 - .	NA	NA	5			NA	NA	NA	NA	NA	NA	NA	NA			NA
78323	LG1	26800738	26802742	g3716	LG1 AUGUSTUS gene 26800738 26802742 0.05 + .	NA	NA	5			NA	NA	NA	NA	NA	NA	NA	NA			NA
78338	LG1	26803968	26806067	g3717	PREDICTED: mannose-1-phosphate guanylyltransferase 1 [Sesamum indicum]	NA	NA	5	Nucleotidyl transferase	Nucleotidyl transferase domain	NA	NA	biosynthetic process | nucleotidyltransferase activity	K00966	GMPP; mannose-1-phosphate guanylyltransferase [EC:2.7.7.13]	A09100 Metabolism	09101 Carbohydrate metabolism	00051 Fructose and mannose metabolism [PATH:ko00051]			AT2G39770.2 | Symbols: CYT1 | Glucose-1-phosphate adenylyltransferase family protein
78355	LG1	26811118	26812358	g3718	PREDICTED: mediator of RNA polymerase II transcription subunit 15a isoform X1 [Nicotiana tomentosiformis]	NA	NA	5			NA	NA	NA	NA	NA	NA	NA	NA			AT1G15780.1 | Symbols: | unknown protein; BEST Arabidopsis thaliana protein match is: unknown protein (TAIR:AT2G10440.1); Has 103701 Blast hits to 43153 proteins in 1828 species: Archae - 30; Bacteria - 7385; Metazoa - 38639; Fungi - 11531; Plants - 7727; Viruses - 307; Other Eukaryotes - 38082 (source: NCBI BLink).
78366	LG1	26812554	26814773	g3719	hypothetical protein (mitochondrion) [Nicotiana tabacum]	NA	NA	5			NA	NA	NA	NA	NA	NA	NA	NA			ATMG00660.1 | Symbols: ORF149 | hypothetical protein
78380	LG1	26815818	26820465	g3720	PREDICTED: mannose-1-phosphate guanylyltransferase 1 [Sesamum indicum]	NA	NA	5	Nucleotidyl transferase	Nucleotidyl transferase domain	NA	NA	biosynthetic process | nucleotidyltransferase activity	NA	NA	NA	NA	NA			AT2G39770.2 | Symbols: CYT1 | Glucose-1-phosphate adenylyltransferase family protein
78401	LG1	26822578	26827226	g3721	PREDICTED: mannose-1-phosphate guanylyltransferase 1 [Nicotiana tomentosiformis]	NA	NA	5	Nucleotidyl transferase	Nucleotidyl transferase domain	NA	NA	biosynthetic process | nucleotidyltransferase activity	K00966	GMPP; mannose-1-phosphate guanylyltransferase [EC:2.7.7.13]	A09100 Metabolism	09101 Carbohydrate metabolism	00051 Fructose and mannose metabolism [PATH:ko00051]			AT2G39770.2 | Symbols: CYT1 | Glucose-1-phosphate adenylyltransferase family protein
78419	LG1	26842087	26855183	g3722	LG1 AUGUSTUS gene 26842087 26855183 0.01 - .	NA	NA	5,4.69			NA	NA	NA	NA	NA	NA	NA	NA			NA
78470	LG1	26855308	26856241	g3723	LG1 AUGUSTUS gene 26855308 26856241 0.11 + .	NA	NA	4.69			NA	NA	NA	NA	NA	NA	NA	NA			NA
78484	LG1	26877128	26880140	g3724	PREDICTED: probable mitochondrial-processing peptidase subunit beta [Sesamum indicum]	NA	NA	4.69			NA	NA	NA	NA	NA	NA	NA	NA			AT3G02090.2 | Symbols: MPPBETA | Insulinase (Peptidase family M16) protein
78500	LG1	26880442	26881773	g3725	LG1 AUGUSTUS gene 26880442 26881773 0.09 - .	NA	NA	4.69			NA	NA	NA	NA	NA	NA	NA	NA			NA
78520	LG1	26886688	26888872	g3726	PREDICTED: serine/threonine-protein phosphatase PP1 isozyme 3 isoform X1 [Sesamum indicum]	NA	NA	4.69	Calcineurin-like phosphoesterase	Calcineurin-like phosphoesterase domain, ApaH type	NA	NA	hydrolase activity	K06269	PPP1C; serine/threonine-protein phosphatase PP1 catalytic subunit [EC:3.1.3.16]	A09120 Genetic Information Processing	09122 Translation	03015 mRNA surveillance pathway [PATH:ko03015]			AT2G39840.1 | Symbols: TOPP4 | type one serine/threonine protein phosphatase 4
78535	LG1	26890218	26892823	g3727	LG1 AUGUSTUS gene 26890218 26892823 0.02 - .	NA	NA	4.69			NA	NA	NA	NA	NA	NA	NA	NA			NA
78550	LG1	26896578	26902084	g3728	PREDICTED: protein YIPF1 homolog isoform X1 [Nicotiana sylvestris]	NA	NA	4.69			NA	NA	NA	NA	NA	NA	NA	NA			AT2G39805.1 | Symbols: | Integral membrane Yip1 family protein
78576	LG1	26903758	26909832	g3729	LG1 AUGUSTUS gene 26903758 26909832 0.04 + .	NA	NA	4.69			NA	NA	NA	NA	NA	NA	NA	NA			NA
78591	LG1	26923828	26934096	g3730	PREDICTED: ATP-dependent DNA helicase PIF1 {ECO:0000255|HAMAP-Rule:MF_03176}-like, partial [Nicotiana tomentosiformis]	NA	NA	4.69	PIF1-like helicase	DNA helicase Pif1-like	chromosome organization	NA	telomere maintenance | DNA helicase activity | DNA repair	NA	NA	NA	NA	NA			AT3G51700.1 | Symbols: | PIF1 helicase
78603	LG1	26938865	26946063	g3731	PREDICTED: uncharacterized protein LOC104108929 [Nicotiana tomentosiformis]	NA	NA	4.69			NA	NA	NA	NA	NA	NA	NA	NA			AT1G43760.1 | Symbols: | DNAse I-like superfamily protein
78633	LG1	26966823	26973313	g3732	PREDICTED: uncharacterized protein LOC105156289 [Sesamum indicum]	NA	NA	4.69	Protein kinase domain; Integrase core domain	Protein kinase domain; Integrase, catalytic core	DNA integration	NA	protein kinase activity | ATP binding | protein phosphorylation	NA	NA	NA	NA	NA			AT4G23160.1 | Symbols: CRK8 | cysteine-rich RLK (RECEPTOR-like protein kinase) 8
78659	LG1	26974076	26977803	g3733	PREDICTED: probable LRR receptor-like serine/threonine-protein kinase At3g47570 isoform X1 [Solanum lycopersicum]	NA	NA	4.69	Leucine rich repeat; Protein kinase domain	Leucine-rich repeat; Protein kinase domain	NA	NA	protein binding	NA	NA	NA	NA	NA			AT3G47570.1 | Symbols: | Leucine-rich repeat protein kinase family protein
78679	LG1	26985000	26988319	g3734	PREDICTED: uncharacterized protein LOC105167143 isoform X1 [Sesamum indicum]	NA	NA	4.69	hAT family C-terminal dimerisation region	HAT, C-terminal dimerisation domain	NA	NA	protein dimerization activity	NA	NA	NA	NA	NA			AT4G15020.2 | Symbols: | hAT transposon superfamily
78711	LG1	26988998	26991395	g3735	PREDICTED: L-type lectin-domain containing receptor kinase S.4-like [Nicotiana tomentosiformis]	NA	NA	4.69	Protein kinase domain; Legume lectin domain	Protein kinase domain; Legume lectin domain	NA	NA	protein kinase activity | ATP binding | protein phosphorylation	NA	NA	NA	NA	NA			AT3G55550.1 | Symbols: | Concanavalin A-like lectin protein kinase family protein
78719	LG1	27014760	27015755	g3736	PREDICTED: LOB domain-containing protein 33-like [Nicotiana sylvestris]	NA	NA	4.69			NA	NA	NA	K13945	LBD29; LOB domain-containing protein 29	A09180 Brite Hierarchies	09182 Protein families: genetic information processing	03000 Transcription factors [BR:ko03000]			AT2G42440.1 | Symbols: | Lateral organ boundaries (LOB) domain family protein
78730	LG1	27015976	27021295	g3737	PREDICTED: probable phosphoribosylformylglycinamidine synthase, chloroplastic/mitochondrial [Solanum lycopersicum]	NA	NA	4.69			NA	NA	NA	K01952	PFAS, purL; phosphoribosylformylglycinamidine synthase [EC:6.3.5.3]	A09100 Metabolism	09104 Nucleotide metabolism	00230 Purine metabolism [PATH:ko00230]			AT1G74260.1 | Symbols: PUR4 | purine biosynthesis 4
84000	LG1	28901001	28902122	g4009	PREDICTED: uncharacterized protein LOC104647070 [Solanum lycopersicum]	NA	0.27	NA			NA	NA	NA	NA	NA	NA	NA	NA			AT4G29090.1 | Symbols: | Ribonuclease H-like superfamily protein
84008	LG1	28902327	28907371	g4010	PREDICTED: mitochondrial import inner membrane translocase subunit TIM44-2 isoform X2 [Nicotiana tomentosiformis]	NA	0.27	NA			NA	NA	NA	K17804	TIM44; mitochondrial import inner membrane translocase subunit TIM44	A09180 Brite Hierarchies	09182 Protein families: genetic information processing	03029 Mitochondrial biogenesis [BR:ko03029]			AT2G36070.1 | Symbols: ATTIM44-2, TIM44-2 | translocase inner membrane subunit 44-2
84049	LG1	28907763	28908652	g4011	PREDICTED: proteinase inhibitor type-2 P303.51-like [Solanum lycopersicum]	NA	0.27	NA	Potato type II proteinase inhibitor family	Proteinase inhibitor I20	enzyme regulator activity	NA	serine-type endopeptidase inhibitor activity	NA	NA	NA	NA	NA			NA
84057	LG1	28912263	28913462	g4012	PREDICTED: proteinase inhibitor type-2 P303.51-like [Solanum lycopersicum]	NA	0.28,0.27	NA	Potato type II proteinase inhibitor family	Proteinase inhibitor I20	enzyme regulator activity	NA	serine-type endopeptidase inhibitor activity	NA	NA	NA	NA	NA			NA
84068	LG1	28922079	28927952	g4013	LG1 AUGUSTUS gene 28922079 28927952 0.02 - .	NA	0.28,0.27,0.27	NA	Potato type II proteinase inhibitor family	Proteinase inhibitor I20	enzyme regulator activity	NA	serine-type endopeptidase inhibitor activity	NA	NA	NA	NA	NA			NA
84080	LG1	28930913	28931952	g4014	LG1 AUGUSTUS gene 28930913 28931952 0.28 - .	1.5	0.28,0.27,0.27,0.27	NA	Potato type II proteinase inhibitor family	Proteinase inhibitor I20	enzyme regulator activity	NA	serine-type endopeptidase inhibitor activity	NA	NA	NA	NA	NA			NA
84091	LG1	28936847	28938292	g4015	PREDICTED: proteinase inhibitor type-2 P303.51-like [Solanum lycopersicum]	1.5	0.28,0.27,0.27,0.27	NA	Potato type II proteinase inhibitor family	Proteinase inhibitor I20	enzyme regulator activity	NA	serine-type endopeptidase inhibitor activity	NA	NA	NA	NA	NA			NA
84108	LG1	28938460	28942302	g4016	putative polyprotein [Solanum lycopersicum]	1.5	0.28,0.27,0.27,0.27	NA	Integrase core domain	Integrase, catalytic core	NA	NA	DNA integration	NA	NA	NA	NA	NA			AT4G23160.1 | Symbols: CRK8 | cysteine-rich RLK (RECEPTOR-like protein kinase) 8
84119	LG1	28952291	28966192	g4017	PREDICTED: wall-associated receptor kinase 2-like [Nicotiana tomentosiformis]	1.52,1.5	0.28,0.27,0.27,0.27	NA	Calcium-binding EGF domain; Protein tyrosine and serine/threonine kinase	EGF-like calcium-binding domain; Serine-threonine/tyrosine-protein kinase, catalytic domain	calcium ion binding	NA	calcium ion binding	K06826	NID; nidogen (entactin)	A09180 Brite Hierarchies	09183 Protein families: signaling and cellular processes	04990 Domain-containing proteins not elsewhere classified [BR:ko04990]			AT1G21270.1 | Symbols: WAK2 | wall-associated kinase 2
84193	LG1	28967829	28971922	g4018	PREDICTED: wall-associated receptor kinase 2-like [Nicotiana tomentosiformis]	1.52,1.5	0.28,0.27,0.27,0.27	NA	Protein kinase domain; Calcium-binding EGF domain	Protein kinase domain; EGF-like calcium-binding domain	calcium ion binding	NA	protein kinase activity | ATP binding | protein phosphorylation	NA	NA	NA	NA	NA			AT1G21240.1 | Symbols: WAK3 | wall associated kinase 3
84220	LG1	28984726	28985852	g4019	PREDICTED: F-box/kelch-repeat protein At1g80440-like [Solanum tuberosum]	1.52,1.5	0.28,0.27,0.27,0.27	NA	F-box domain	F-box domain	NA	NA	protein binding	NA	NA	NA	NA	NA			AT1G80440.1 | Symbols: | Galactose oxidase/kelch repeat superfamily protein
84231	LG1	28987383	28988452	g4020	PREDICTED: F-box/kelch-repeat protein At1g80440-like [Solanum tuberosum]	1.52,1.5	0.28,0.27,0.27,0.27	NA	F-box domain	F-box domain	NA	NA	protein binding	NA	NA	NA	NA	NA			AT1G80440.1 | Symbols: | Galactose oxidase/kelch repeat superfamily protein
84245	LG1	28988577	28989076	g4021	LG1 AUGUSTUS gene 28988577 28989076 0.15 + .	1.52,1.5	0.28,0.27,0.27,0.27	NA			NA	NA	NA	NA	NA	NA	NA	NA			NA
84253	LG1	28993224	28996342	g4022	PREDICTED: wall-associated receptor kinase 2-like [Nicotiana tomentosiformis]	1.52,1.5	0.28,0.27,0.27	NA	Protein kinase domain; Calcium-binding EGF domain	Protein kinase domain; EGF-like calcium-binding domain	calcium ion binding	NA	protein kinase activity | ATP binding | protein phosphorylation	NA	NA	NA	NA	NA			AT1G21240.1 | Symbols: WAK3 | wall associated kinase 3
84267	LG1	29002418	29005602	g4023	PREDICTED: wall-associated receptor kinase 2-like [Nicotiana tomentosiformis]	1.52,1.5	0.27,0.27	NA	Wall-associated receptor kinase galacturonan-binding; Protein kinase domain; Calcium-binding EGF domain	Wall-associated receptor kinase, galacturonan-binding domain; Protein kinase domain; EGF-like calcium-binding domain	calcium ion binding	NA	polysaccharide binding	NA	NA	NA	NA	NA			AT1G21240.1 | Symbols: WAK3 | wall associated kinase 3
84284	LG1	29010008	29012922	g4024	LG1 AUGUSTUS gene 29010008 29012922 0.07 - .	1.52,1.5	0.27,0.27	NA			NA	NA	NA	NA	NA	NA	NA	NA			NA
84296	LG1	29017055	29018132	g4025	PREDICTED: F-box/kelch-repeat protein At1g80440-like [Solanum tuberosum]	1.52,1.5	0.27	NA	F-box domain	F-box domain	NA	NA	protein binding	NA	NA	NA	NA	NA			AT1G80440.1 | Symbols: | Galactose oxidase/kelch repeat superfamily protein
84313	LG1	29019115	29022002	g4026	PREDICTED: wall-associated receptor kinase 2-like [Nicotiana tomentosiformis]	1.52	0.27	NA	Protein tyrosine and serine/threonine kinase	Serine-threonine/tyrosine-protein kinase, catalytic domain	NA	NA	protein kinase activity | protein phosphorylation	NA	NA	NA	NA	NA			AT1G21230.1 | Symbols: WAK5 | wall associated kinase 5
84328	LG1	29029329	29030402	g4027	PREDICTED: wall-associated receptor kinase 5-like [Sesamum indicum]	1.52	NA	NA			NA	NA	NA	NA	NA	NA	NA	NA			AT1G21270.1 | Symbols: WAK2 | wall-associated kinase 2
84336	LG1	29033842	29036922	g4028	PREDICTED: putative wall-associated receptor kinase-like 16 [Sesamum indicum]	1.52	NA	NA	Protein tyrosine and serine/threonine kinase; Wall-associated receptor kinase galacturonan-binding; Calcium-binding EGF domain	Serine-threonine/tyrosine-protein kinase, catalytic domain; Wall-associated receptor kinase, galacturonan-binding domain; EGF-like calcium-binding domain	polysaccharide binding	NA	protein kinase activity | protein phosphorylation	NA	NA	NA	NA	NA			AT1G21230.1 | Symbols: WAK5 | wall associated kinase 5
85837	LG1	29541915	29546081	g4105	PREDICTED: ranBP2-type zinc finger protein At1g67325 [Nicotiana tomentosiformis]	NA	NA	9.45			NA	NA	NA	NA	NA	NA	NA	NA			AT1G67325.1 | Symbols: | Ran BP2/NZF zinc finger-like superfamily protein
85872	LG1	29547585	29551830	g4106	PREDICTED: squamosa promoter-binding-like protein 12-like isoform X1 [Solanum tuberosum]	NA	NA	9.45	SBP domain	SBP domain	NA	NA	DNA binding	NA	NA	NA	NA	NA			AT5G43270.1 | Symbols: SPL2 | squamosa promoter binding protein-like 2
85893	LG1	29559499	29562210	g4107	PREDICTED: agamous-like MADS-box protein AGL27 [Nicotiana tomentosiformis]	NA	NA	12.67,9.45	K-box region	Transcription factor, K-box	NA	NA	DNA-binding transcription factor activity | nucleus | regulation of transcription, DNA-templated	NA	NA	NA	NA	NA			NA
85917	LG1	29569375	29571960	g4108	Polyprotein, putative [Solanum demissum]	NA	NA	12.67,9.45,7.43			NA	NA	NA	NA	NA	NA	NA	NA			NA
85940	LG1	29574715	29577770	g4109	PREDICTED: agamous-like MADS-box protein AGL27 isoform X1 [Nicotiana sylvestris]	NA	NA	12.67,9.45,7.43			NA	NA	NA	NA	NA	NA	NA	NA			AT5G10140.2 | Symbols: FLC, FLF, AGL25 | K-box region and MADS-box transcription factor family protein
85951	LG1	29578088	29579930	g4110	PREDICTED: uncharacterized protein LOC104121458 [Nicotiana tomentosiformis]	NA	NA	12.67,9.45,7.43			NA	NA	NA	NA	NA	NA	NA	NA			NA
85974	LG1	29580451	29584750	g4111	PREDICTED: uncharacterized protein LOC104093994 [Nicotiana tomentosiformis]	NA	NA	12.67,9.45,7.43			NA	NA	NA	NA	NA	NA	NA	NA			NA
86004	LG1	29584845	29585609	g4112	PREDICTED: uncharacterized protein LOC104088124, partial [Nicotiana tomentosiformis]	NA	NA	12.67,9.45,7.43	Reverse transcriptase-like	Ribonuclease H domain	NA	NA	nucleic acid binding | RNA-DNA hybrid ribonuclease activity	NA	NA	NA	NA	NA			NA
86012	LG1	29586255	29588890	g4113	sepallata3-like MADS-box [Nicotiana tabacum]	NA	NA	12.67,9.45,7.43	K-box region	Transcription factor, K-box	NA	NA	DNA-binding transcription factor activity | nucleus | regulation of transcription, DNA-templated	NA	NA	NA	NA	NA			AT1G24260.2 | Symbols: SEP3, AGL9 | K-box region and MADS-box transcription factor family protein
86036	LG1	29591756	29592990	g4114	LG1 AUGUSTUS gene 29591756 29592990 0.15 - .	NA	0.27	12.67,9.45,7.43	SRF-type transcription factor (DNA-binding and dimerisation domain)	Transcription factor, MADS-box	NA	NA	DNA binding | protein dimerization activity	NA	NA	NA	NA	NA			NA
86047	LG1	29598732	29600959	g4115	LG1 AUGUSTUS gene 29598732 29600959 0.19 + .	NA	0.27	12.67,9.45,7.43			NA	NA	NA	NA	NA	NA	NA	NA			NA
86064	LG1	29617896	29620667	g4116	PREDICTED: squamosa promoter-binding-like protein 16 [Nicotiana sylvestris]	NA	0.3,0.29,0.27	12.67,9.45,7.43	SBP domain	SBP domain	NA	NA	DNA binding	NA	NA	NA	NA	NA			AT5G50570.2 | Symbols: SPL13A, SPL13 | Squamosa promoter-binding protein-like (SBP domain) transcription factor family protein
86079	LG1	29630053	29630877	g4117	LG1 AUGUSTUS gene 29630053 29630877 0.1 - .	NA	0.3,0.29,0.29,0.29,0.27	12.67,12.24,9.45,7.43,6.12			NA	NA	NA	NA	NA	NA	NA	NA			NA
86087	LG1	29639502	29640273	g4118	PREDICTED: mitogen-activated protein kinase kinase 5-like [Nicotiana tomentosiformis]	NA	0.3,0.29,0.29,0.29,0.27	12.67,12.24,9.45,7.43,6.12			NA	NA	NA	NA	NA	NA	NA	NA			AT3G21220.1 | Symbols: ATMKK5, ATMAP2K_ALPHA, MAP2K_A, MKK5, ATMEK5, MEK5 | MAP kinase kinase 5
86095	LG1	29645776	29650957	g4119	PREDICTED: wall-associated receptor kinase 2-like [Sesamum indicum]	NA	0.3,0.29,0.29,0.29,0.27,0.27	12.67,12.24,9.45,7.43,6.12	Calcium-binding EGF domain	EGF-like calcium-binding domain	calcium ion binding	NA	calcium ion binding	NA	NA	NA	NA	NA			AT1G21240.1 | Symbols: WAK3 | wall associated kinase 3
86139	LG1	29655667	29664267	g4120	PREDICTED: wall-associated receptor kinase 2-like [Nicotiana tomentosiformis]	NA	0.3,0.29,0.29,0.29,0.27,0.27	12.67,12.24,9.45,7.43,6.12	Calcium-binding EGF domain; Cytochrome P450; Protein kinase domain	EGF-like calcium-binding domain; Cytochrome P450; Protein kinase domain	calcium ion binding	NA	calcium ion binding	NA	NA	NA	NA	NA			AT1G21240.1 | Symbols: WAK3 | wall associated kinase 3
86168	LG1	29670263	29673087	g4121	PREDICTED: cytochrome P450 716B2-like [Solanum tuberosum]	NA	0.3,0.29,0.29,0.29,0.27,0.27	12.67,12.24,9.45,7.43,6.12	Cytochrome P450	Cytochrome P450	NA	NA	iron ion binding | oxidoreductase activity, acting on paired donors, with incorporation or reduction of molecular oxygen | heme binding | oxidation-reduction process	NA	NA	NA	NA	NA			AT5G36110.1 | Symbols: CYP716A1 | cytochrome P450, family 716, subfamily A, polypeptide 1
86185	LG1	29680682	29685577	g4122	PREDICTED: cytochrome P450 716B2-like [Solanum tuberosum]	NA	0.29,0.29,0.29,0.27	12.67,12.24,9.45,7.43,6.12	Calcium-binding EGF domain; Protein tyrosine and serine/threonine kinase; Cytochrome P450	EGF-like calcium-binding domain; Serine-threonine/tyrosine-protein kinase, catalytic domain; Cytochrome P450	calcium ion binding	NA	calcium ion binding	NA	NA	NA	NA	NA			AT5G36110.1 | Symbols: CYP716A1 | cytochrome P450, family 716, subfamily A, polypeptide 1
86217	LG1	29697631	29700967	g4123	PREDICTED: wall-associated receptor kinase 2-like [Nicotiana tomentosiformis]	NA	0.29,0.29,0.27	12.67,12.24,9.45,7.43,6.12	Calcium-binding EGF domain; Protein kinase domain	EGF-like calcium-binding domain; Protein kinase domain	calcium ion binding	NA	calcium ion binding	NA	NA	NA	NA	NA			AT1G21240.1 | Symbols: WAK3 | wall associated kinase 3
86231	LG1	29712282	29713023	g4124	LG1 AUGUSTUS gene 29712282 29713023 0.05 + .	NA	0.29,0.27	12.67,12.24,9.45,7.43,6.12			NA	NA	NA	NA	NA	NA	NA	NA			NA
86242	LG1	29724802	29727317	g4125	PREDICTED: pyruvate dehydrogenase E1 component subunit alpha, mitochondrial-like [Nicotiana sylvestris]	NA	0.27	12.67,12.24,9.45,7.43,6.12	Dehydrogenase E1 component	Dehydrogenase, E1 component	NA	NA	oxidoreductase activity, acting on the aldehyde or oxo group of donors, disulfide as acceptor	NA	NA	NA	NA	NA			AT1G59900.1 | Symbols: AT-E1 ALPHA, E1 ALPHA | pyruvate dehydrogenase complex E1 alpha subunit
86259	LG1	29727672	29730232	g4126	PREDICTED: putative cyclic nucleotide-gated ion channel 18 [Sesamum indicum]	NA	0.27	12.67,12.24,7.43,6.12	Ion transport protein	Ion transport domain	NA	NA	ion channel activity | ion transport | membrane | transmembrane transport	NA	NA	NA	NA	NA			AT5G14870.1 | Symbols: CNGC18, ATCNGC18 | cyclic nucleotide-gated channel 18
86279	LG1	29736928	29741767	g4127	PREDICTED: wall-associated receptor kinase 2-like [Nicotiana tomentosiformis]	NA	NA	12.67,12.24,7.43,6.12	Protein kinase domain	Protein kinase domain	NA	NA	protein kinase activity | ATP binding | protein phosphorylation	NA	NA	NA	NA	NA			AT1G21270.1 | Symbols: WAK2 | wall-associated kinase 2
86302	LG1	29742422	29743458	g4128	LG1 AUGUSTUS gene 29742422 29743458 0.12 + .	NA	NA	12.24,7.43,6.12			NA	NA	NA	NA	NA	NA	NA	NA			NA
86310	LG1	29748512	29754187	g4129	PREDICTED: wall-associated receptor kinase 2-like [Nicotiana tomentosiformis]	NA	NA	12.24,7.43,6.12	Wall-associated receptor kinase galacturonan-binding; Calcium-binding EGF domain; Protein kinase domain	Wall-associated receptor kinase, galacturonan-binding domain; EGF-like calcium-binding domain; Protein kinase domain	NA	NA	polysaccharide binding	NA	NA	NA	NA	NA			AT1G21240.1 | Symbols: WAK3 | wall associated kinase 3
86333	LG1	29754352	29755885	g4130	LG1 AUGUSTUS gene 29754352 29755885 0.12 + .	NA	NA	12.24,6.12			NA	NA	NA	NA	NA	NA	NA	NA			NA
86347	LG1	29759612	29762845	g4131	PREDICTED: wall-associated receptor kinase 2-like [Nicotiana tomentosiformis]	NA	NA	12.24,6.12	Wall-associated receptor kinase galacturonan-binding; Calcium-binding EGF domain; Protein tyrosine and serine/threonine kinase	Wall-associated receptor kinase, galacturonan-binding domain; EGF-like calcium-binding domain; Serine-threonine/tyrosine-protein kinase, catalytic domain	NA	NA	polysaccharide binding	NA	NA	NA	NA	NA			AT1G21240.1 | Symbols: WAK3 | wall associated kinase 3
86367	LG1	29769671	29772732	g4132	PREDICTED: putative wall-associated receptor kinase-like 16 [Sesamum indicum]	NA	NA	12.24,6.12	Calcium-binding EGF domain; Protein kinase domain; Wall-associated receptor kinase galacturonan-binding	EGF-like calcium-binding domain; Protein kinase domain; Wall-associated receptor kinase, galacturonan-binding domain	NA	NA	calcium ion binding	NA	NA	NA	NA	NA			AT1G21240.1 | Symbols: WAK3 | wall associated kinase 3
86381	LG1	29777481	29780665	g4133	PREDICTED: wall-associated receptor kinase 2-like [Nicotiana tomentosiformis]	NA	NA	12.24,6.12	Calcium-binding EGF domain; Wall-associated receptor kinase galacturonan-binding	EGF-like calcium-binding domain; Wall-associated receptor kinase, galacturonan-binding domain	NA	NA	calcium ion binding	NA	NA	NA	NA	NA			AT1G21240.1 | Symbols: WAK3 | wall associated kinase 3
86401	LG1	29781201	29785146	g4134	PREDICTED: wall-associated receptor kinase 5-like [Solanum tuberosum]	NA	NA	12.24,6.12	Protein kinase domain	Protein kinase domain	NA	NA	protein kinase activity | ATP binding | protein phosphorylation	NA	NA	NA	NA	NA			AT1G19390.1 | Symbols: | Wall-associated kinase family protein
86424	LG1	29787161	29794440	g4135	PREDICTED: protein trichome birefringence-like 19 [Nicotiana sylvestris]	NA	NA	6.12			NA	NA	NA	NA	NA	NA	NA	NA			AT5G15890.1 | Symbols: TBL21 | TRICHOME BIREFRINGENCE-LIKE 21
86468	LG1	29820511	29821146	g4136	LG1 AUGUSTUS gene 29820511 29821146 0.1 - .	NA	NA	6.12			NA	NA	NA	NA	NA	NA	NA	NA			NA
86482	LG1	29824363	29824876	g4137	LG1 AUGUSTUS gene 29824363 29824876 0.04 - .	NA	NA	6.12			NA	NA	NA	NA	NA	NA	NA	NA			NA
94010	LG10	1677957	1682721	g38401	PREDICTED: LOW QUALITY PROTEIN: G-type lectin S-receptor-like serine/threonine-protein kinase CES101 [Sesamum indicum]	NA	0.33,0.31,0.31,0.29	NA	Protein kinase domain	Protein kinase domain	NA	NA	protein kinase activity | ATP binding | protein phosphorylation	NA	NA	NA	NA	NA			AT4G23280.1 | Symbols: CRK20 | cysteine-rich RLK (RECEPTOR-like protein kinase) 20
94039	LG10	1683076	1685491	g38402	PREDICTED: G-type lectin S-receptor-like serine/threonine-protein kinase At1g11330 isoform X1 [Sesamum indicum]	NA	0.34,0.33,0.31,0.31,0.29	NA			NA	NA	NA	NA	NA	NA	NA	NA			AT1G11330.2 | Symbols: | S-locus lectin protein kinase family protein
94056	LG10	1690265	1692621	g38403	PREDICTED: uncharacterized protein LOC104247431 [Nicotiana sylvestris]	NA	0.35,0.34,0.33,0.31,0.31,0.29	NA			NA	NA	NA	NA	NA	NA	NA	NA			NA
94079	LG10	1692956	1700535	g38404	PREDICTED: peroxisome biogenesis protein 3-2-like [Solanum tuberosum]	NA	0.35,0.34,0.33,0.31,0.31,0.29	NA	Protein tyrosine and serine/threonine kinase	Serine-threonine/tyrosine-protein kinase, catalytic domain	NA	NA	protein kinase activity | protein phosphorylation	NA	NA	NA	NA	NA			AT1G48635.1 | Symbols: PEX3, PEX3-2 | peroxin 3
94126	LG10	1702546	1707956	g38405	PREDICTED: wall-associated receptor kinase-like 1 [Nicotiana sylvestris]	1.54	0.35,0.35,0.34,0.33,0.31,0.31,0.29	NA	Wall-associated receptor kinase galacturonan-binding; Protein kinase domain	Wall-associated receptor kinase, galacturonan-binding domain; Protein kinase domain	polysaccharide binding	NA	polysaccharide binding	NA	NA	NA	NA	NA			AT1G16260.2 | Symbols: | Wall-associated kinase family protein
94146	LG10	1712144	1716254	g38406	PREDICTED: wall-associated receptor kinase-like 1 [Nicotiana sylvestris]	1.58,1.54	0.36,0.35,0.35,0.34,0.33,0.31,0.31,0.29	NA	Protein kinase domain; Wall-associated receptor kinase galacturonan-binding	Protein kinase domain; Wall-associated receptor kinase, galacturonan-binding domain	polysaccharide binding	NA	protein kinase activity | ATP binding | protein phosphorylation	NA	NA	NA	NA	NA			AT1G16260.2 | Symbols: | Wall-associated kinase family protein
94163	LG10	1718834	1724334	g38407	PREDICTED: wall-associated receptor kinase-like 1 [Nicotiana sylvestris]	1.58,1.54	0.36,0.35,0.35,0.34,0.33,0.31,0.31,0.29	NA	Protein kinase domain; Wall-associated receptor kinase galacturonan-binding	Protein kinase domain; Wall-associated receptor kinase, galacturonan-binding domain	polysaccharide binding	NA	protein kinase activity | ATP binding | protein phosphorylation	NA	NA	NA	NA	NA			AT1G69730.1 | Symbols: | Wall-associated kinase family protein
94180	LG10	1725714	1733141	g38408	PREDICTED: wall-associated receptor kinase-like 2 [Sesamum indicum]	1.69,1.58,1.54	0.36,0.35,0.35,0.34,0.34,0.33,0.31,0.31,0.29	NA	Protein kinase domain; Wall-associated receptor kinase galacturonan-binding	Protein kinase domain; Wall-associated receptor kinase, galacturonan-binding domain	polysaccharide binding	NA	protein kinase activity | ATP binding | protein phosphorylation	NA	NA	NA	NA	NA			AT1G69730.1 | Symbols: | Wall-associated kinase family protein
94203	LG10	1734984	1738775	g38409	PREDICTED: wall-associated receptor kinase-like 1 [Solanum lycopersicum]	1.8,1.69,1.58,1.54	0.36,0.35,0.35,0.34,0.34,0.33,0.31,0.31,0.29	NA	Protein kinase domain; Wall-associated receptor kinase galacturonan-binding; Protein tyrosine and serine/threonine kinase	Protein kinase domain; Wall-associated receptor kinase, galacturonan-binding domain; Serine-threonine/tyrosine-protein kinase, catalytic domain	polysaccharide binding	NA	protein kinase activity | ATP binding | protein phosphorylation	NA	NA	NA	NA	NA			AT1G16260.2 | Symbols: | Wall-associated kinase family protein
94223	LG10	1744094	1749007	g38410	PREDICTED: wall-associated receptor kinase-like 1 [Solanum lycopersicum]	1.83,1.8,1.69,1.58,1.54	0.36,0.35,0.35,0.34,0.34,0.33,0.31,0.29,0.27	NA	Wall-associated receptor kinase galacturonan-binding	Wall-associated receptor kinase, galacturonan-binding domain	polysaccharide binding	NA	polysaccharide binding	NA	NA	NA	NA	NA			AT1G79670.2 | Symbols: RFO1, WAKL22 | Wall-associated kinase family protein
94249	LG10	1752844	1757858	g38411	PREDICTED: wall-associated receptor kinase-like 8 [Sesamum indicum]	1.86,1.83,1.8,1.69,1.58,1.54	0.36,0.35,0.35,0.34,0.34,0.33,0.29,0.27	NA	Wall-associated receptor kinase galacturonan-binding	Wall-associated receptor kinase, galacturonan-binding domain	polysaccharide binding	NA	polysaccharide binding	NA	NA	NA	NA	NA			NA
94267	LG10	1763044	1767799	g38412	PREDICTED: wall-associated receptor kinase-like 1 [Nicotiana sylvestris]	1.86,1.83,1.81,1.8,1.69,1.58,1.54	0.36,0.35,0.35,0.34,0.34,0.29,0.27	NA	Wall-associated receptor kinase galacturonan-binding; Protein kinase domain	Wall-associated receptor kinase, galacturonan-binding domain; Protein kinase domain	polysaccharide binding	NA	polysaccharide binding	NA	NA	NA	NA	NA			AT1G19390.1 | Symbols: | Wall-associated kinase family protein
94287	LG10	1771814	1778596	g38413	PREDICTED: wall-associated receptor kinase-like 1 [Solanum lycopersicum]	1.86,1.83,1.81,1.8,1.7,1.69,1.58,1.54	0.36,0.35,0.35,0.34,0.29,0.27	NA	Wall-associated receptor kinase galacturonan-binding; Protein kinase domain	Wall-associated receptor kinase, galacturonan-binding domain; Protein kinase domain	polysaccharide binding	NA	polysaccharide binding	NA	NA	NA	NA	NA			AT1G69730.1 | Symbols: | Wall-associated kinase family protein
94317	LG10	1779164	1782681	g38414	PREDICTED: wall-associated receptor kinase-like 1 [Nicotiana sylvestris]	1.86,1.83,1.81,1.8,1.7,1.69,1.58,1.54	0.36,0.35,0.35,0.34,0.29,0.27	NA	Protein kinase domain	Protein kinase domain	NA	NA	protein kinase activity | ATP binding | protein phosphorylation	NA	NA	NA	NA	NA			AT1G69730.1 | Symbols: | Wall-associated kinase family protein
94337	LG10	1784574	1788937	g38415	PREDICTED: wall-associated receptor kinase-like 2 [Sesamum indicum]	1.86,1.83,1.81,1.8,1.7,1.69,1.58,1.54,1.53	0.36,0.35,0.34,0.29,0.27	NA	Protein kinase domain; Wall-associated receptor kinase galacturonan-binding	Protein kinase domain; Wall-associated receptor kinase, galacturonan-binding domain	polysaccharide binding	NA	protein kinase activity | ATP binding | protein phosphorylation	NA	NA	NA	NA	NA			AT1G69730.1 | Symbols: | Wall-associated kinase family protein
94354	LG10	1791034	1791745	g38416	LG10 AUGUSTUS gene 1791034 1791745 0.16 + .	1.86,1.83,1.81,1.8,1.7,1.69,1.58,1.54,1.53,1.48	0.36,0.35,0.34,0.29,0.27	NA			NA	NA	NA	NA	NA	NA	NA	NA			NA
94362	LG10	1792474	1793253	g38417	PREDICTED: uncharacterized protein LOC102585795 [Solanum tuberosum]	1.86,1.83,1.81,1.8,1.7,1.69,1.58,1.54,1.53,1.48	0.36,0.35,0.34,0.29,0.27	NA			NA	NA	NA	NA	NA	NA	NA	NA			AT3G45900.1 | Symbols: | Ribonuclease P protein subunit P38-related
94370	LG10	1793464	1795530	g38418	PREDICTED: uncharacterized protein LOC102585795 [Solanum tuberosum]	1.86,1.83,1.81,1.8,1.7,1.69,1.58,1.53,1.48	0.36,0.34,0.29,0.27	NA			NA	NA	NA	NA	NA	NA	NA	NA			AT3G45900.1 | Symbols: | Ribonuclease P protein subunit P38-related
94385	LG10	1799904	1800678	g38419	LG10 AUGUSTUS gene 1799904 1800678 0.15 + .	1.86,1.83,1.81,1.8,1.7,1.69,1.58,1.53,1.48	0.36,0.34,0.29,0.27	NA			NA	NA	NA	NA	NA	NA	NA	NA			NA
94396	LG10	1804074	1806581	g38420	PREDICTED: wall-associated receptor kinase-like 1 [Nicotiana sylvestris]	1.86,1.83,1.81,1.8,1.7,1.69,1.53,1.48	0.34,0.29,0.27	NA	Protein tyrosine and serine/threonine kinase	Serine-threonine/tyrosine-protein kinase, catalytic domain	NA	NA	protein kinase activity | protein phosphorylation	NA	NA	NA	NA	NA			AT1G69730.1 | Symbols: | Wall-associated kinase family protein
94416	LG10	1808514	1812261	g38421	PREDICTED: wall-associated receptor kinase-like 1 [Solanum lycopersicum]	1.86,1.83,1.81,1.8,1.7,1.53,1.48	0.29,0.27	NA	Wall-associated receptor kinase galacturonan-binding; Protein kinase domain	Wall-associated receptor kinase, galacturonan-binding domain; Protein kinase domain	polysaccharide binding	NA	polysaccharide binding	NA	NA	NA	NA	NA			AT1G69730.1 | Symbols: | Wall-associated kinase family protein
94442	LG10	1816984	1822886	g38422	PREDICTED: wall-associated receptor kinase-like 1 [Solanum lycopersicum]	1.86,1.83,1.81,1.7,1.53,1.48	0.27	NA	Wall-associated receptor kinase galacturonan-binding	Wall-associated receptor kinase, galacturonan-binding domain	polysaccharide binding	NA	polysaccharide binding	NA	NA	NA	NA	NA			AT1G69730.1 | Symbols: | Wall-associated kinase family protein
94468	LG10	1827244	1834431	g38423	PREDICTED: wall-associated receptor kinase-like 1 [Nicotiana sylvestris]	1.86,1.83,1.81,1.7,1.53,1.48	0.27	NA	Wall-associated receptor kinase galacturonan-binding	Wall-associated receptor kinase, galacturonan-binding domain	polysaccharide binding	NA	polysaccharide binding	NA	NA	NA	NA	NA			AT1G69730.1 | Symbols: | Wall-associated kinase family protein
94494	LG10	1835237	1836099	g38424	LG10 AUGUSTUS gene 1835237 1836099 0.1 - .	1.86,1.81,1.7,1.53,1.48	0.27	NA			NA	NA	NA	NA	NA	NA	NA	NA			NA
94502	LG10	1836474	1844367	g38425	PREDICTED: translational activator GCN1 [Solanum lycopersicum]	1.7,1.53,1.48	NA	NA			NA	NA	NA	NA	NA	NA	NA	NA			NA
94519	LG10	1862215	1867039	g38426	PREDICTED: LOW QUALITY PROTEIN: G-type lectin S-receptor-like serine/threonine-protein kinase CES101 [Sesamum indicum]	1.53,1.48	NA	NA	Protein tyrosine and serine/threonine kinase	Serine-threonine/tyrosine-protein kinase, catalytic domain	NA	NA	protein kinase activity | protein phosphorylation	NA	NA	NA	NA	NA			AT1G11330.1 | Symbols: | S-locus lectin protein kinase family protein
94548	LG10	1867404	1872819	g38427	PREDICTED: LOW QUALITY PROTEIN: G-type lectin S-receptor-like serine/threonine-protein kinase CES101 [Sesamum indicum]	1.53,1.48	NA	NA	Protein tyrosine and serine/threonine kinase	Serine-threonine/tyrosine-protein kinase, catalytic domain	NA	NA	protein kinase activity | protein phosphorylation	NA	NA	NA	NA	NA			AT3G16030.1 | Symbols: CES101 | lectin protein kinase family protein
94589	LG10	1874314	1877979	g38428	PREDICTED: LOW QUALITY PROTEIN: G-type lectin S-receptor-like serine/threonine-protein kinase CES101 [Sesamum indicum]	1.48	NA	NA	Protein tyrosine and serine/threonine kinase; Domain of unknown function (DUF3403)	Serine-threonine/tyrosine-protein kinase, catalytic domain; S-locus receptor kinase, C-terminal	NA	NA	protein kinase activity | protein phosphorylation	NA	NA	NA	NA	NA			AT3G16030.1 | Symbols: CES101 | lectin protein kinase family protein
94618	LG10	1879435	1881020	g38429	PREDICTED: G-type lectin S-receptor-like serine/threonine-protein kinase At1g11330 isoform X1 [Sesamum indicum]	1.48	NA	NA	Protein tyrosine and serine/threonine kinase; Domain of unknown function (DUF3403)	Serine-threonine/tyrosine-protein kinase, catalytic domain; S-locus receptor kinase, C-terminal	NA	NA	protein kinase activity | protein phosphorylation	NA	NA	NA	NA	NA			AT4G23180.1 | Symbols: CRK10, RLK4 | cysteine-rich RLK (RECEPTOR-like protein kinase) 10
94638	LG10	1881635	1885029	g38430	PREDICTED: LOW QUALITY PROTEIN: G-type lectin S-receptor-like serine/threonine-protein kinase CES101 [Sesamum indicum]	1.48	NA	NA	Protein tyrosine and serine/threonine kinase	Serine-threonine/tyrosine-protein kinase, catalytic domain	NA	NA	protein kinase activity | protein phosphorylation	NA	NA	NA	NA	NA			AT3G16030.1 | Symbols: CES101 | lectin protein kinase family protein
94664	LG10	1885122	1886240	g38431	LG10 AUGUSTUS gene 1885122 1886240 0.03 - .	1.48	NA	NA			NA	NA	NA	NA	NA	NA	NA	NA			NA
95028	LG10	1980372	1981170	g38449	LG10 AUGUSTUS gene 1980372 1981170 0.27 - .	1.61	NA	NA			NA	NA	NA	NA	NA	NA	NA	NA			NA
95036	LG10	1983406	1986880	g38450	PREDICTED: wall-associated receptor kinase-like 2 [Sesamum indicum]	1.61	NA	NA	Protein kinase domain	Protein kinase domain	NA	NA	protein kinase activity | ATP binding | protein phosphorylation	NA	NA	NA	NA	NA			AT1G79670.2 | Symbols: RFO1, WAKL22 | Wall-associated kinase family protein
95056	LG10	1988160	1991330	g38451	PREDICTED: wall-associated receptor kinase-like 8 [Sesamum indicum]	1.61	NA	NA	Protein tyrosine and serine/threonine kinase; Wall-associated receptor kinase galacturonan-binding	Serine-threonine/tyrosine-protein kinase, catalytic domain; Wall-associated receptor kinase, galacturonan-binding domain	polysaccharide binding	NA	protein kinase activity | protein phosphorylation	NA	NA	NA	NA	NA			AT1G16260.2 | Symbols: | Wall-associated kinase family protein
95076	LG10	1992165	1992995	g38452	PREDICTED: LOW QUALITY PROTEIN: uncharacterized protein LOC104223244 [Nicotiana sylvestris]	1.61,1.48	NA	NA			NA	NA	NA	NA	NA	NA	NA	NA			ATMG00810.1 | Symbols: ORF240B | DNA/RNA polymerases superfamily protein
95087	LG10	1995209	1996620	g38453	PREDICTED: wall-associated receptor kinase-like 1 [Solanum lycopersicum]	1.61,1.48	NA	NA	Protein tyrosine and serine/threonine kinase	Serine-threonine/tyrosine-protein kinase, catalytic domain	NA	NA	protein kinase activity | protein phosphorylation	NA	NA	NA	NA	NA			AT1G69730.1 | Symbols: | Wall-associated kinase family protein
95101	LG10	1999344	2000400	g38454	LG10 AUGUSTUS gene 1999344 2000400 0.38 - .	1.61,1.48	NA	NA			NA	NA	NA	NA	NA	NA	NA	NA			AT1G21240.1 | Symbols: WAK3 | wall associated kinase 3
95112	LG10	2001691	2005050	g38455	PREDICTED: wall-associated receptor kinase-like 1 [Solanum lycopersicum]	1.61,1.48	NA	NA	Protein kinase domain	Protein kinase domain	NA	NA	protein kinase activity | ATP binding | protein phosphorylation	NA	NA	NA	NA	NA			AT1G69730.1 | Symbols: | Wall-associated kinase family protein
95132	LG10	2007885	2010721	g38456	PREDICTED: serine/threonine-protein kinase EDR1 isoform X1 [Nicotiana sylvestris]	1.61,1.48	NA	NA			NA	NA	NA	NA	NA	NA	NA	NA			AT2G31010.2 | Symbols: | Protein kinase superfamily protein
95150	LG10	2011341	2014150	g38457	PREDICTED: wall-associated receptor kinase-like 1 [Solanum lycopersicum]	1.61,1.48,1.48	NA	NA	Wall-associated receptor kinase galacturonan-binding; Protein kinase domain	Wall-associated receptor kinase, galacturonan-binding domain; Protein kinase domain	polysaccharide binding	NA	polysaccharide binding	NA	NA	NA	NA	NA			AT1G16110.1 | Symbols: WAKL6 | wall associated kinase-like 6
95164	LG10	2014667	2018160	g38458	PREDICTED: wall-associated receptor kinase-like 1 [Nicotiana sylvestris]	1.61,1.48,1.48	NA	NA	Wall-associated receptor kinase galacturonan-binding; Protein kinase domain	Wall-associated receptor kinase, galacturonan-binding domain; Protein kinase domain	polysaccharide binding	NA	polysaccharide binding	NA	NA	NA	NA	NA			AT1G69730.1 | Symbols: | Wall-associated kinase family protein
95178	LG10	2020539	2023840	g38459	PREDICTED: wall-associated receptor kinase-like 1 [Nicotiana sylvestris]	1.61,1.48,1.48	NA	NA	Protein kinase domain	Protein kinase domain	NA	NA	protein kinase activity | ATP binding | protein phosphorylation	NA	NA	NA	NA	NA			AT1G79670.2 | Symbols: RFO1, WAKL22 | Wall-associated kinase family protein
95195	LG10	2024983	2028300	g38460	PREDICTED: wall-associated receptor kinase-like 1 [Solanum lycopersicum]	1.61,1.48,1.48	NA	NA	Protein kinase domain; Wall-associated receptor kinase galacturonan-binding	Protein kinase domain; Wall-associated receptor kinase, galacturonan-binding domain	polysaccharide binding	NA	protein kinase activity | ATP binding | protein phosphorylation	NA	NA	NA	NA	NA			AT1G69730.1 | Symbols: | Wall-associated kinase family protein
95209	LG10	2029145	2030000	g38461	PREDICTED: uncharacterized protein LOC101249672 [Solanum lycopersicum]	1.61,1.48,1.48	NA	NA			NA	NA	NA	NA	NA	NA	NA	NA			AT4G23160.1 | Symbols: CRK8 | cysteine-rich RLK (RECEPTOR-like protein kinase) 8
95217	LG10	2031598	2033020	g38462	PREDICTED: wall-associated receptor kinase-like 1 [Solanum lycopersicum]	1.61,1.48,1.48	NA	NA	Protein kinase domain	Protein kinase domain	NA	NA	protein kinase activity | ATP binding | protein phosphorylation	NA	NA	NA	NA	NA			AT1G69730.1 | Symbols: | Wall-associated kinase family protein
95228	LG10	2035950	2037010	g38463	LG10 AUGUSTUS gene 2035950 2037010 0.35 - .	1.61,1.48,1.48	NA	NA			NA	NA	NA	NA	NA	NA	NA	NA			AT1G21240.1 | Symbols: WAK3 | wall associated kinase 3
95239	LG10	2038287	2041400	g38464	PREDICTED: wall-associated receptor kinase-like 1 [Solanum lycopersicum]	1.61,1.48,1.48	NA	NA	Wall-associated receptor kinase galacturonan-binding; Protein tyrosine and serine/threonine kinase	Wall-associated receptor kinase, galacturonan-binding domain; Serine-threonine/tyrosine-protein kinase, catalytic domain	polysaccharide binding	NA	polysaccharide binding	NA	NA	NA	NA	NA			AT1G69730.1 | Symbols: | Wall-associated kinase family protein
95259	LG10	2043420	2046610	g38465	PREDICTED: wall-associated receptor kinase-like 1 [Solanum lycopersicum]	1.61,1.48,1.48	NA	NA	Wall-associated receptor kinase galacturonan-binding; Protein kinase domain	Wall-associated receptor kinase, galacturonan-binding domain; Protein kinase domain	polysaccharide binding	NA	polysaccharide binding	NA	NA	NA	NA	NA			AT1G69730.1 | Symbols: | Wall-associated kinase family protein
95273	LG10	2047675	2051160	g38466	PREDICTED: wall-associated receptor kinase-like 1 [Solanum lycopersicum]	1.61,1.48,1.48	NA	NA	Wall-associated receptor kinase galacturonan-binding; Protein kinase domain	Wall-associated receptor kinase, galacturonan-binding domain; Protein kinase domain	polysaccharide binding	NA	polysaccharide binding	NA	NA	NA	NA	NA			AT1G16260.2 | Symbols: | Wall-associated kinase family protein
95288	LG10	2051255	2058074	g38467	putative polyprotein [Solanum lycopersicum]	1.61,1.48,1.48	NA	NA	Integrase core domain	Integrase, catalytic core	NA	NA	DNA integration	NA	NA	NA	NA	NA			AT4G23160.1 | Symbols: CRK8 | cysteine-rich RLK (RECEPTOR-like protein kinase) 8
95306	LG10	2058076	2058670	g38468	LG10 AUGUSTUS gene 2058076 2058670 0.39 - .	1.61,1.48,1.48	NA	NA	Wall-associated receptor kinase galacturonan-binding	Wall-associated receptor kinase, galacturonan-binding domain	polysaccharide binding	NA	polysaccharide binding	NA	NA	NA	NA	NA			AT1G16160.1 | Symbols: WAKL5 | wall associated kinase-like 5
95314	LG10	2061870	2067180	g38469	PREDICTED: wall-associated receptor kinase-like 1 [Nicotiana sylvestris]	1.61,1.48,1.48	NA	NA	Wall-associated receptor kinase galacturonan-binding; Protein kinase domain	Wall-associated receptor kinase, galacturonan-binding domain; Protein kinase domain	polysaccharide binding	NA	polysaccharide binding	NA	NA	NA	NA	NA			AT1G69730.1 | Symbols: | Wall-associated kinase family protein
95334	LG10	2071258	2075477	g38470	PREDICTED: wall-associated receptor kinase-like 1 [Solanum lycopersicum]	1.61,1.48,1.48	NA	NA	Wall-associated receptor kinase galacturonan-binding; Protein kinase domain	Wall-associated receptor kinase, galacturonan-binding domain; Protein kinase domain	polysaccharide binding	NA	polysaccharide binding	NA	NA	NA	NA	NA			AT1G16260.2 | Symbols: | Wall-associated kinase family protein
95351	LG10	2075599	2076587	g38471	PREDICTED: wall-associated receptor kinase-like 1 [Solanum lycopersicum]	1.48,1.48	NA	NA	Protein kinase domain	Protein kinase domain	NA	NA	protein kinase activity | ATP binding | protein phosphorylation	NA	NA	NA	NA	NA			AT1G16110.1 | Symbols: WAKL6 | wall associated kinase-like 6
95362	LG10	2083716	2086257	g38472	PREDICTED: wall-associated receptor kinase-like 1 [Nicotiana sylvestris]	1.48,1.48	NA	NA	Protein kinase domain	Protein kinase domain	NA	NA	protein kinase activity | ATP binding | protein phosphorylation	NA	NA	NA	NA	NA			AT1G69730.1 | Symbols: | Wall-associated kinase family protein
95376	LG10	2087241	2088617	g38473	PREDICTED: wall-associated receptor kinase-like 1 [Solanum lycopersicum]	1.48	NA	NA			NA	NA	NA	NA	NA	NA	NA	NA			NA
95387	LG10	2093701	2097257	g38474	PREDICTED: wall-associated receptor kinase-like 2 [Sesamum indicum]	1.48	NA	NA	Protein kinase domain	Protein kinase domain	NA	NA	protein kinase activity | ATP binding | protein phosphorylation	NA	NA	NA	NA	NA			AT1G69730.1 | Symbols: | Wall-associated kinase family protein
95410	LG10	2099462	2100414	g38475	LG10 AUGUSTUS gene 2099462 2100414 0.51 + .	1.48	NA	NA			NA	NA	NA	NA	NA	NA	NA	NA			NA
95421	LG10	2103521	2108777	g38476	PREDICTED: wall-associated receptor kinase-like 1 [Solanum lycopersicum]	1.48	NA	NA	Protein kinase domain; Wall-associated receptor kinase galacturonan-binding	Protein kinase domain; Wall-associated receptor kinase, galacturonan-binding domain	polysaccharide binding	NA	protein kinase activity | ATP binding | protein phosphorylation	NA	NA	NA	NA	NA			AT1G69730.1 | Symbols: | Wall-associated kinase family protein
110066	LG10	6741165	6742988	g39119	PREDICTED: aspartic proteinase nepenthesin-1 [Sesamum indicum]	NA	NA	4.55			NA	NA	NA	NA	NA	NA	NA	NA			AT5G45120.1 | Symbols: | Eukaryotic aspartyl protease family protein
110077	LG10	6752093	6755638	g39120	PREDICTED: transmembrane protein 56 [Sesamum indicum]	NA	NA	4.55	TLC domain	TRAM/LAG1/CLN8 homology domain	NA	NA	integral component of membrane	NA	NA	NA	NA	NA			AT1G31300.2 | Symbols: | TRAM, LAG1 and CLN8 (TLC) lipid-sensing domain containing protein
110107	LG10	6780616	6786498	g39121	PREDICTED: BOI-related E3 ubiquitin-protein ligase 1-like [Nicotiana sylvestris]	NA	NA	4.55			NA	NA	NA	K19042	BOI; E3 ubiquitin-protein ligase BOI and related proteins [EC:2.3.2.27]	A09180 Brite Hierarchies	09182 Protein families: genetic information processing	04121 Ubiquitin system [BR:ko04121]			AT3G12920.1 | Symbols: | SBP (S-ribonuclease binding protein) family protein
110119	LG10	6793026	6793948	g39122	LG10 AUGUSTUS gene 6793026 6793948 0.12 - .	NA	NA	4.55			NA	NA	NA	NA	NA	NA	NA	NA			NA
110133	LG10	6794899	6797318	g39123	LG10 AUGUSTUS gene 6794899 6797318 0.01 - .	NA	NA	4.55			NA	NA	NA	NA	NA	NA	NA	NA			NA
110145	LG10	6807423	6808607	g39124	PREDICTED: transcription initiation factor TFIID subunit 8 [Nicotiana sylvestris]	NA	NA	4.55			NA	NA	NA	NA	NA	NA	NA	NA			AT1G31240.1 | Symbols: | Bromodomain transcription factor
110153	LG10	6809033	6812898	g39125	PREDICTED: vesicle-associated membrane protein 722-like [Nicotiana tomentosiformis]	NA	NA	4.55	Synaptobrevin	Synaptobrevin	NA	NA	integral component of membrane | vesicle-mediated transport	NA	NA	NA	NA	NA			AT1G04760.1 | Symbols: ATVAMP726, VAMP726 | vesicle-associated membrane protein 726
110176	LG10	6813625	6815948	g39126	LG10 AUGUSTUS gene 6813625 6815948 0.06 - .	NA	NA	4.55			NA	NA	NA	NA	NA	NA	NA	NA			NA
110188	LG10	6817696	6820828	g39127	LG10 AUGUSTUS gene 6817696 6820828 0.05 - .	NA	NA	4.55			NA	NA	NA	NA	NA	NA	NA	NA			NA
110203	LG10	6823453	6824378	g39128	PREDICTED: exocyst complex component EXO84C [Sesamum indicum]	NA	NA	4.55			NA	NA	NA	NA	NA	NA	NA	NA			AT1G10180.1 | Symbols: | BEST Arabidopsis thaliana protein match is: exocyst complex component 84B (TAIR:AT5G49830.1); Has 132 Blast hits to 132 proteins in 25 species: Archae - 0; Bacteria - 0; Metazoa - 7; Fungi - 0; Plants - 117; Viruses - 0; Other Eukaryotes - 8 (source: NCBI BLink).
110211	LG10	6826613	6830671	g39129	PREDICTED: exocyst complex component EXO84C [Nicotiana tomentosiformis]	NA	NA	4.55			NA	NA	NA	K19986	EXOC8, SEC84; exocyst complex component 8	A09180 Brite Hierarchies	09182 Protein families: genetic information processing	04131 Membrane trafficking [BR:ko04131]			AT1G10180.1 | Symbols: | BEST Arabidopsis thaliana protein match is: exocyst complex component 84B (TAIR:AT5G49830.1); Has 132 Blast hits to 132 proteins in 25 species: Archae - 0; Bacteria - 0; Metazoa - 7; Fungi - 0; Plants - 117; Viruses - 0; Other Eukaryotes - 8 (source: NCBI BLink).
110232	LG10	6831683	6833408	g39130	LG10 AUGUSTUS gene 6831683 6833408 0.17 + .	NA	NA	4.55			NA	NA	NA	NA	NA	NA	NA	NA			NA
110243	LG10	6834493	6838058	g39131	PREDICTED: uncharacterized protein LOC104111685 [Nicotiana tomentosiformis]	NA	NA	4.55			NA	NA	NA	NA	NA	NA	NA	NA			NA
110269	LG10	6840013	6842216	g39132	LG10 AUGUSTUS gene 6840013 6842216 0.01 + .	NA	NA	4.55			NA	NA	NA	NA	NA	NA	NA	NA			NA
110283	LG10	6842903	6844829	g39133	LG10 AUGUSTUS gene 6842903 6844829 0.01 + .	NA	NA	4.55			NA	NA	NA	NA	NA	NA	NA	NA			NA
110303	LG10	6849193	6853156	g39134	LG10 AUGUSTUS gene 6849193 6853156 0.01 + .	NA	NA	4.55			NA	NA	NA	NA	NA	NA	NA	NA			AT3G12110.1 | Symbols: ACT11 | actin-11
110326	LG10	6863922	6865243	g39135	PREDICTED: protein PHLOEM PROTEIN 2-LIKE A9-like [Sesamum indicum]	NA	NA	4.55			NA	NA	NA	NA	NA	NA	NA	NA			AT1G31200.1 | Symbols: ATPP2-A9, PP2-A9 | phloem protein 2-A9
110340	LG10	6866348	6869487	g39136	PREDICTED: uncharacterized protein PHLOEM PROTEIN 2-LIKE A4-like [Nicotiana tomentosiformis]	NA	NA	4.55			NA	NA	NA	NA	NA	NA	NA	NA			AT1G33920.1 | Symbols: ATPP2-A4, PP2-A4 | phloem protein 2-A4
110351	LG10	6871657	6872487	g39137	PREDICTED: protein PHLOEM PROTEIN 2-LIKE A1 [Nicotiana sylvestris]	NA	NA	4.55			NA	NA	NA	NA	NA	NA	NA	NA			AT4G19840.1 | Symbols: ATPP2-A1, ATPP2A-1, PP2-A1 | phloem protein 2-A1
110365	LG10	6879802	6882495	g39138	LG10 AUGUSTUS gene 6879802 6882495 0.02 + .	NA	NA	4.55			NA	NA	NA	NA	NA	NA	NA	NA			NA
110382	LG10	6888652	6894498	g39139	PREDICTED: uncharacterized protein LOC104230215 [Nicotiana sylvestris]	NA	NA	4.55			NA	NA	NA	NA	NA	NA	NA	NA			AT2G35155.1 | Symbols: | Trypsin family protein
110414	LG10	6895262	6895676	g39140	LG10 AUGUSTUS gene 6895262 6895676 0.11 + .	NA	NA	4.55			NA	NA	NA	NA	NA	NA	NA	NA			NA
110422	LG10	6897570	6902217	g39141	PREDICTED: uncharacterized protein At4g19900 [Nicotiana sylvestris]	NA	NA	4.55			NA	NA	NA	NA	NA	NA	NA	NA			AT4G19900.1 | Symbols: | alpha 1,4-glycosyltransferase family protein
110445	LG10	6903307	6908427	g39142	PREDICTED: uncharacterized protein LOC104089778 [Nicotiana tomentosiformis]	NA	NA	4.55			NA	NA	NA	NA	NA	NA	NA	NA			NA
110469	LG10	6915203	6916037	g39143	PREDICTED: uncharacterized protein LOC104089792 [Nicotiana tomentosiformis]	NA	NA	4.55			NA	NA	NA	K02907	RP-L30, MRPL30, rpmD; large subunit ribosomal protein L30	A09120 Genetic Information Processing	09122 Translation	03010 Ribosome [PATH:ko03010]			AT5G55140.1 | Symbols: | ribosomal protein L30 family protein
110480	LG10	6916669	6920187	g39144	PREDICTED: uncharacterized protein LOC104236815 [Nicotiana sylvestris]	NA	NA	4.55			NA	NA	NA	NA	NA	NA	NA	NA			NA
110498	LG10	6926552	6929923	g39145	PREDICTED: pentatricopeptide repeat-containing protein At2g35130 [Nicotiana tomentosiformis]	NA	NA	4.55			NA	NA	NA	NA	NA	NA	NA	NA			AT2G35130.1 | Symbols: | Tetratricopeptide repeat (TPR)-like superfamily protein
110530	LG10	6931432	6934571	g39146	PREDICTED: 50S ribosomal protein L13, chloroplastic [Sesamum indicum]	NA	NA	4.55	Ribosomal protein L13	Ribosomal protein L13	NA	NA	structural constituent of ribosome | ribosome | translation	NA	NA	NA	NA	NA			AT3G01790.2 | Symbols: | Ribosomal protein L13 family protein
110551	LG10	6936222	6938586	g39147	PREDICTED: glycine cleavage system H protein 2, mitochondrial-like [Nicotiana sylvestris]	NA	NA	4.55			NA	NA	NA	K02437	gcvH, GCSH; glycine cleavage system H protein	A09100 Metabolism	09101 Carbohydrate metabolism	00630 Glyoxylate and dicarboxylate metabolism [PATH:ko00630]			AT2G35120.1 | Symbols: | Single hybrid motif superfamily protein
119121	LG10	10191883	10194204	g39560	PREDICTED: putative pentatricopeptide repeat-containing protein At1g56570 [Nicotiana sylvestris]	NA	NA	4.75			NA	NA	NA	NA	NA	NA	NA	NA			AT1G56570.1 | Symbols: | Tetratricopeptide repeat (TPR)-like superfamily protein
119142	LG10	10196934	10203874	g39561	PREDICTED: AP-3 complex subunit mu [Solanum lycopersicum]	NA	NA	4.75			NA	NA	NA	K12398	AP3M; AP-3 complex subunit mu	A09140 Cellular Processes	09141 Transport and catabolism	04142 Lysosome [PATH:ko04142]			AT1G56590.1 | Symbols: ZIP4 | Clathrin adaptor complexes medium subunit family protein
119178	LG10	10206789	10207477	g39562	LG10 AUGUSTUS gene 10206789 10207477 0.11 + .	NA	NA	4.75			NA	NA	NA	NA	NA	NA	NA	NA			NA
119186	LG10	10208769	10209214	g39563	LG10 AUGUSTUS gene 10208769 10209214 0.17 + .	NA	NA	4.75			NA	NA	NA	NA	NA	NA	NA	NA			NA
119194	LG10	10211188	10219624	g39564	PREDICTED: phenylalanine--tRNA ligase, chloroplastic/mitochondrial-like [Solanum tuberosum]	NA	NA	4.75	tRNA synthetases class II core domain (F)	Phenylalanyl-tRNA synthetase	NA	NA	tRNA binding | aminoacyl-tRNA ligase activity | ATP binding | tRNA aminoacylation	K01889	FARSA, pheS; phenylalanyl-tRNA synthetase alpha chain [EC:6.1.1.20]	A09120 Genetic Information Processing	09122 Translation	00970 Aminoacyl-tRNA biosynthesis [PATH:ko00970]			AT3G58140.1 | Symbols: | phenylalanyl-tRNA synthetase class IIc family protein
119235	LG10	10220490	10222134	g39565	PREDICTED: cytosolic sulfotransferase 12-like [Nicotiana tomentosiformis]	NA	NA	4.75	Sulfotransferase domain	Sulfotransferase domain	sulfotransferase activity	NA	sulfotransferase activity	NA	NA	NA	NA	NA			AT3G45070.1 | Symbols: | P-loop containing nucleoside triphosphate hydrolases superfamily protein
119243	LG10	10223649	10224925	g39566	PREDICTED: cytosolic sulfotransferase 12-like [Nicotiana tomentosiformis]	NA	NA	4.75	Sulfotransferase domain	Sulfotransferase domain	sulfotransferase activity	NA	sulfotransferase activity	NA	NA	NA	NA	NA			AT2G03760.1 | Symbols: ST, ATST1, RAR047, ST1, AtSOT1, AtSOT12, SOT12 | sulphotransferase 12
119254	LG10	10231586	10232064	g39567	LG10 AUGUSTUS gene 10231586 10232064 0.22 - .	NA	NA	4.75			NA	NA	NA	NA	NA	NA	NA	NA			NA
119262	LG10	10233109	10234313	g39568	PREDICTED: uncharacterized protein LOC104240844 [Nicotiana sylvestris]	NA	NA	4.75			NA	NA	NA	NA	NA	NA	NA	NA			NA
119273	LG10	10234350	10235104	g39569	LG10 AUGUSTUS gene 10234350 10235104 0.04 - .	NA	NA	4.75			NA	NA	NA	NA	NA	NA	NA	NA			NA
119281	LG10	10236315	10237584	g39570	LG10 AUGUSTUS gene 10236315 10237584 0.05 - .	NA	NA	4.75			NA	NA	NA	NA	NA	NA	NA	NA			NA
119292	LG10	10245579	10247131	g39571	PREDICTED: UDP-glucose flavonoid 3-O-glucosyltransferase 6-like [Solanum tuberosum]	NA	NA	4.75	UDP-glucoronosyl and UDP-glucosyl transferase	UDP-glucuronosyl/UDP-glucosyltransferase	NA	NA	UDP-glycosyltransferase activity	NA	NA	NA	NA	NA			AT3G21760.1 | Symbols: HYR1 | UDP-Glycosyltransferase superfamily protein
119300	LG10	10251389	10252371	g39572	LG10 AUGUSTUS gene 10251389 10252371 0.05 + .	NA	NA	4.75			NA	NA	NA	NA	NA	NA	NA	NA			NA
119308	LG10	10257099	10258006	g39573	PREDICTED: bifunctional epoxide hydrolase 2-like [Nicotiana sylvestris]	NA	NA	4.75			NA	NA	NA	NA	NA	NA	NA	NA			AT4G02340.1 | Symbols: | alpha/beta-Hydrolases superfamily protein
119319	LG10	10265561	10273414	g39574	PREDICTED: C2 and GRAM domain-containing protein At1g03370-like [Nicotiana tomentosiformis]	NA	NA	4.75			NA	NA	NA	NA	NA	NA	NA	NA			AT3G59660.1 | Symbols: | C2 domain-containing protein / GRAM domain-containing protein
119370	LG10	10275673	10276704	g39575	PREDICTED: C2 and GRAM domain-containing protein At1g03370-like [Nicotiana sylvestris]	NA	NA	4.75			NA	NA	NA	NA	NA	NA	NA	NA			NA
119378	LG10	10284739	10290953	g39576	PREDICTED: ATP-dependent DNA helicase PIF1-like [Nicotiana sylvestris]	NA	NA	4.75	PIF1-like helicase	DNA helicase Pif1-like	chromosome organization	NA	telomere maintenance | DNA helicase activity | DNA repair	NA	NA	NA	NA	NA			NA
119389	LG10	10292730	10295274	g39577	Putative gag-pol polyprotein, identical [Solanum demissum]	NA	NA	4.75			NA	NA	NA	NA	NA	NA	NA	NA			NA
119406	LG10	10299569	10301907	g39578	PREDICTED: uncharacterized protein LOC105160986 [Sesamum indicum]	NA	NA	4.75			NA	NA	NA	NA	NA	NA	NA	NA			NA
119417	LG10	10323715	10326424	g39579	LG10 AUGUSTUS gene 10323715 10326424 0.06 - .	NA	NA	4.75			NA	NA	NA	NA	NA	NA	NA	NA			NA
119449	LG10	10326967	10328324	g39580	PREDICTED: uncharacterized protein LOC104246050 [Nicotiana sylvestris]	NA	NA	4.75			NA	NA	NA	NA	NA	NA	NA	NA			NA
119460	LG10	10331109	10333044	g39581	LG10 AUGUSTUS gene 10331109 10333044 0.03 - .	NA	NA	4.75			NA	NA	NA	NA	NA	NA	NA	NA			NA
119475	LG10	10334779	10338431	g39582	PREDICTED: uncharacterized protein LOC104113951 [Nicotiana tomentosiformis]	NA	NA	4.75			NA	NA	NA	NA	NA	NA	NA	NA			AT3G59680.1 | Symbols: | unknown protein; Has 34 Blast hits to 34 proteins in 10 species: Archae - 0; Bacteria - 0; Metazoa - 0; Fungi - 0; Plants - 34; Viruses - 0; Other Eukaryotes - 0 (source: NCBI BLink).
119484	LG10	10339649	10347153	g39583	PREDICTED: uncharacterized protein LOC104648515 [Solanum lycopersicum]	NA	NA	4.75	Reverse transcriptase-like	Ribonuclease H domain	NA	NA	nucleic acid binding | RNA-DNA hybrid ribonuclease activity	NA	NA	NA	NA	NA			AT3G01410.2 | Symbols: | Polynucleotidyl transferase, ribonuclease H-like superfamily protein
119534	LG10	10347555	10351014	g39584	PREDICTED: uncharacterized protein LOC101243893 [Solanum lycopersicum]	NA	NA	4.75			NA	NA	NA	NA	NA	NA	NA	NA			NA
119561	LG10	10352808	10359849	g39585	PREDICTED: biotin--protein ligase-like [Solanum tuberosum]	NA	NA	4.75	Biotin/lipoate A/B protein ligase family	Biotinyl protein ligase (BPL) and lipoyl protein ligase (LPL), catalytic domain	NA	NA	cellular protein modification process	K01942	HLCS; biotin---protein ligase [EC:6.3.4.9 6.3.4.10 6.3.4.11 6.3.4.15]	A09100 Metabolism	09108 Metabolism of cofactors and vitamins	00780 Biotin metabolism [PATH:ko00780]			AT2G25710.2 | Symbols: HCS1 | holocarboxylase synthase 1
119595	LG10	10361834	10366349	g39586	Polyprotein, putative [Solanum demissum]	NA	NA	4.75			NA	NA	NA	NA	NA	NA	NA	NA			AT4G23160.1 | Symbols: CRK8 | cysteine-rich RLK (RECEPTOR-like protein kinase) 8
119624	LG10	10367320	10371519	g39587	PREDICTED: uncharacterized protein LOC101260201 [Solanum lycopersicum]	NA	NA	4.75			NA	NA	NA	NA	NA	NA	NA	NA			AT1G40390.1 | Symbols: | DNAse I-like superfamily protein
119650	LG10	10374014	10374933	g39588	PREDICTED: acyl-[acyl-carrier-protein] desaturase, chloroplastic [Solanum lycopersicum]	NA	NA	4.75			NA	NA	NA	NA	NA	NA	NA	NA			NA
119658	LG10	10375464	10377377	g39589	PREDICTED: acyl-[acyl-carrier-protein] desaturase, chloroplastic [Nicotiana tomentosiformis]	NA	NA	4.75	Fatty acid desaturase	Fatty acid desaturase, type 2	NA	NA	fatty acid metabolic process | acyl-[acyl-carrier-protein] desaturase activity | oxidation-reduction process	NA	NA	NA	NA	NA			AT2G43710.2 | Symbols: SSI2, FAB2 | Plant stearoyl-acyl-carrier-protein desaturase family protein
119669	LG10	10387854	10389709	g39590	LG10 AUGUSTUS gene 10387854 10389709 0.05 - .	NA	NA	4.75			NA	NA	NA	NA	NA	NA	NA	NA			NA
122532	LG10	11532323	11538275	g39747	LG10 AUGUSTUS gene 11532323 11538275 0.01 - .	NA	NA	4.95			NA	NA	NA	NA	NA	NA	NA	NA			NA
122559	LG10	11539190	11540556	g39748	LG10 AUGUSTUS gene 11539190 11540556 0.03 + .	NA	NA	4.95			NA	NA	NA	NA	NA	NA	NA	NA			NA
122573	LG10	11543410	11544201	g39749	PREDICTED: LOW QUALITY PROTEIN: uncharacterized protein LOC104223244 [Nicotiana sylvestris]	NA	NA	4.95			NA	NA	NA	NA	NA	NA	NA	NA			AT4G23160.1 | Symbols: CRK8 | cysteine-rich RLK (RECEPTOR-like protein kinase) 8
122581	LG10	11544490	11547638	g39750	PREDICTED: zinc finger BED domain-containing protein DAYSLEEPER-like [Nicotiana tomentosiformis]	NA	NA	4.95	hAT family C-terminal dimerisation region	HAT, C-terminal dimerisation domain	NA	NA	protein dimerization activity	NA	NA	NA	NA	NA			AT3G42170.1 | Symbols: | BED zinc finger ;hAT family dimerisation domain
122596	LG10	11547790	11553845	g39751	LG10 AUGUSTUS gene 11547790 11553845 0.06 + .	NA	NA	4.95			NA	NA	NA	NA	NA	NA	NA	NA			NA
122611	LG10	11564380	11568574	g39752	PREDICTED: uncharacterized protein LOC105158123 [Sesamum indicum]	NA	NA	4.95			NA	NA	NA	NA	NA	NA	NA	NA			ATMG00820.1 | Symbols: ORF170 | Reverse transcriptase (RNA-dependent DNA polymerase)
122636	LG10	11569290	11571275	g39753	PREDICTED: uncharacterized protein LOC104242954 [Nicotiana sylvestris]	NA	NA	4.95			NA	NA	NA	NA	NA	NA	NA	NA			AT2G33510.1 | Symbols: | CONTAINS InterPro DOMAIN/s: WW/Rsp5/WWP (InterPro:IPR001202); BEST Arabidopsis thaliana protein match is: unknown protein (TAIR:AT1G28070.1); Has 3898 Blast hits to 1138 proteins in 179 species: Archae - 0; Bacteria - 40; Metazoa - 2353; Fungi - 242; Plants - 298; Viruses - 92; Other Eukaryotes - 873 (source: NCBI BLink).
122648	LG10	11578982	11585025	g39754	PREDICTED: uncharacterized protein LOC104093207 [Nicotiana tomentosiformis]	NA	NA	4.95			NA	NA	NA	NA	NA	NA	NA	NA			NA
122667	LG10	11597255	11598965	g39755	LG10 AUGUSTUS gene 11597255 11598965 0.07 - .	NA	NA	4.95			NA	NA	NA	NA	NA	NA	NA	NA			NA
122679	LG10	11602584	11604405	g39756	LG10 AUGUSTUS gene 11602584 11604405 0.02 - .	NA	NA	4.95			NA	NA	NA	NA	NA	NA	NA	NA			NA
122690	LG10	11604929	11607805	g39757	LG10 AUGUSTUS gene 11604929 11607805 0.05 - .	NA	NA	4.95			NA	NA	NA	NA	NA	NA	NA	NA			NA
122702	LG10	11610874	11614195	g39758	PREDICTED: GEM-like protein 5 [Solanum lycopersicum]	NA	NA	4.95			NA	NA	NA	NA	NA	NA	NA	NA			AT5G13200.1 | Symbols: | GRAM domain family protein
122716	LG10	11619830	11624325	g39759	LG10 AUGUSTUS gene 11619830 11624325 0.02 - .	NA	NA	4.95			NA	NA	NA	NA	NA	NA	NA	NA			NA
122725	LG10	11624381	11625365	g39760	LG10 AUGUSTUS gene 11624381 11625365 0.03 - .	NA	NA	4.95			NA	NA	NA	NA	NA	NA	NA	NA			NA
122739	LG10	11628200	11634171	g39761	PREDICTED: uncharacterized protein LOC104246050 [Nicotiana sylvestris]	NA	NA	4.95	Reverse transcriptase-like	Ribonuclease H domain	NA	NA	nucleic acid binding | RNA-DNA hybrid ribonuclease activity	NA	NA	NA	NA	NA			NA
122778	LG10	11637670	11640704	g39762	PREDICTED: ribosome-recycling factor, chloroplastic [Nicotiana sylvestris]	NA	NA	4.95			NA	NA	NA	K02838	frr, MRRF, RRF; ribosome recycling factor	A09180 Brite Hierarchies	09182 Protein families: genetic information processing	03012 Translation factors [BR:ko03012]			AT3G01800.1 | Symbols: | Ribosome recycling factor
122807	LG10	11658250	11658800	g39763	LG10 AUGUSTUS gene 11658250 11658800 0.03 + .	NA	NA	4.95			NA	NA	NA	NA	NA	NA	NA	NA			NA
122815	LG10	11663600	11667328	g39764	PREDICTED: protein TIFY 9-like [Solanum tuberosum]	NA	NA	4.95			NA	NA	NA	K13464	JAZ; jasmonate ZIM domain-containing protein	A09130 Environmental Information Processing	09132 Signal transduction	04075 Plant hormone signal transduction [PATH:ko04075]			AT5G13220.1 | Symbols: JAZ10, TIFY9, JAS1 | jasmonate-zim-domain protein 10
122835	LG10	11668373	11670905	g39765	phospholipid hydroperoxide glutathione peroxidase, partial [Nicotiana benthamiana]	NA	NA	4.95			NA	NA	NA	NA	NA	NA	NA	NA			NA
122852	LG10	11671750	11674675	g39766	PREDICTED: cytochrome b-c1 complex subunit Rieske-1, mitochondrial [Nicotiana tomentosiformis]	NA	NA	4.95	Ubiquinol cytochrome reductase transmembrane region; Rieske [2Fe-2S] domain	Cytochrome b-c1 complex subunit Rieske, transmembrane domain; Rieske [2Fe-2S] iron-sulphur domain	NA	NA	ubiquinol-cytochrome-c reductase activity | oxidation-reduction process	K00411	UQCRFS1, RIP1, petA; ubiquinol-cytochrome c reductase iron-sulfur subunit [EC:7.1.1.8]	A09100 Metabolism	09102 Energy metabolism	00190 Oxidative phosphorylation [PATH:ko00190]			AT5G13430.1 | Symbols: | Ubiquinol-cytochrome C reductase iron-sulfur subunit
122863	LG10	11677800	11686324	g39767	PREDICTED: hsp70 nucleotide exchange factor FES1 [Sesamum indicum]	NA	NA	4.95			NA	NA	NA	K09562	HSPBP1, FES1; hsp70-interacting protein	A09120 Genetic Information Processing	09123 Folding, sorting and degradation	04141 Protein processing in endoplasmic reticulum [PATH:ko04141]			AT3G51980.1 | Symbols: | ARM repeat superfamily protein
122892	LG10	11688890	11692234	g39768	PREDICTED: phosphatidylinositol/phosphatidylcholine transfer protein SFH8-like isoform X1 [Sesamum indicum]	NA	NA	4.95			NA	NA	NA	NA	NA	NA	NA	NA			AT4G39170.2 | Symbols: | Sec14p-like phosphatidylinositol transfer family protein
122919	LG10	11693103	11695915	g39769	LG10 AUGUSTUS gene 11693103 11695915 0.02 - .	NA	NA	4.95			NA	NA	NA	NA	NA	NA	NA	NA			NA
122933	LG10	11698465	11700265	g39770	PREDICTED: uncharacterized protein LOC105167219 [Sesamum indicum]	NA	NA	4.95			NA	NA	NA	NA	NA	NA	NA	NA			AT4G20520.1 | Symbols: | RNA binding;RNA-directed DNA polymerases
122953	LG10	11705091	11707525	g39771	PREDICTED: uncharacterized protein LOC104227677 [Nicotiana sylvestris]	NA	NA	4.95	PIF1-like helicase	DNA helicase Pif1-like	chromosome organization	NA	telomere maintenance | DNA helicase activity | DNA repair	NA	NA	NA	NA	NA			NA
122971	LG10	11710750	11711496	g39772	LG10 AUGUSTUS gene 11710750 11711496 0.13 + .	NA	NA	4.95			NA	NA	NA	NA	NA	NA	NA	NA			NA
122979	LG10	11712028	11715015	g39773	PREDICTED: uncharacterized protein LOC104084654 [Nicotiana tomentosiformis]	NA	NA	4.95			NA	NA	NA	NA	NA	NA	NA	NA			NA
122999	LG10	11715063	11723845	g39774	PREDICTED: LOW QUALITY PROTEIN: uncharacterized protein LOC105178691 [Sesamum indicum]	NA	NA	4.95			NA	NA	NA	NA	NA	NA	NA	NA			NA
123023	LG10	11724750	11726495	g39775	LG10 AUGUSTUS gene 11724750 11726495 0.15 - .	NA	NA	4.95			NA	NA	NA	NA	NA	NA	NA	NA			NA
125690	LG10	12645147	12647738	g39901	PREDICTED: uncharacterized protein LOC105158662 [Sesamum indicum]	NA	0.27	NA			NA	NA	NA	NA	NA	NA	NA	NA			NA
125705	LG10	12652037	12655076	g39902	LG10 AUGUSTUS gene 12652037 12655076 0.04 + .	NA	0.27,0.27	NA			NA	NA	NA	NA	NA	NA	NA	NA			NA
125725	LG10	12656227	12656828	g39903	LG10 AUGUSTUS gene 12656227 12656828 0.18 + .	NA	0.27,0.27	NA			NA	NA	NA	NA	NA	NA	NA	NA			NA
125733	LG10	12658897	12664956	g39904	PREDICTED: uncharacterized protein LOC104241107 [Nicotiana sylvestris]	NA	0.27,0.27	NA			NA	NA	NA	NA	NA	NA	NA	NA			AT4G23160.1 | Symbols: CRK8 | cysteine-rich RLK (RECEPTOR-like protein kinase) 8
125762	LG10	12671777	12677342	g39905	PREDICTED: squamosa promoter-binding-like protein 12-like isoform X1 [Solanum tuberosum]	NA	0.28,0.27,0.27,0.27	NA	SBP domain	SBP domain	NA	NA	DNA binding	NA	NA	NA	NA	NA			AT5G43270.1 | Symbols: SPL2 | squamosa promoter binding protein-like 2
125781	LG10	12682777	12684115	g39906	LG10 AUGUSTUS gene 12682777 12684115 0.08 + .	NA	0.28,0.28,0.27,0.27,0.27	NA			NA	NA	NA	NA	NA	NA	NA	NA			NA
125792	LG10	12688347	12692686	g39907	PREDICTED: uncharacterized protein LOC101249672 [Solanum lycopersicum]	NA	0.28,0.28,0.27,0.27,0.27	NA			NA	NA	NA	NA	NA	NA	NA	NA			AT4G23160.1 | Symbols: CRK8 | cysteine-rich RLK (RECEPTOR-like protein kinase) 8
125821	LG10	12694659	12700322	g39908	PREDICTED: ranBP2-type zinc finger protein At1g67325 [Nicotiana tomentosiformis]	NA	0.3,0.28,0.28,0.27,0.27,0.27	NA			NA	NA	NA	NA	NA	NA	NA	NA			AT1G67325.1 | Symbols: | Ran BP2/NZF zinc finger-like superfamily protein
125848	LG10	12700435	12713802	g39909	PREDICTED: lysosomal alpha-mannosidase-like [Nicotiana tomentosiformis]	NA	0.3,0.29,0.28,0.28,0.27,0.27,0.27	NA	Glycosyl hydrolases family 38 N-terminal domain	Glycoside hydrolase family 38, N-terminal domain	NA	NA	alpha-mannosidase activity | mannose metabolic process	NA	NA	NA	NA	NA			AT5G13980.2 | Symbols: | Glycosyl hydrolase family 38 protein
125885	LG10	12717037	12718013	g39910	LG10 AUGUSTUS gene 12717037 12718013 0.01 + .	NA	0.3,0.29,0.28,0.28,0.27,0.27,0.27,0.27	NA			NA	NA	NA	NA	NA	NA	NA	NA			NA
125899	LG10	12728887	12730583	g39911	LG10 AUGUSTUS gene 12728887 12730583 0.11 + .	NA	0.3,0.29,0.28,0.28,0.27,0.27,0.27	NA			NA	NA	NA	NA	NA	NA	NA	NA			NA
125913	LG10	12737627	12740810	g39912	PREDICTED: non-specific lipid transfer protein GPI-anchored 1 [Nicotiana tomentosiformis]	NA	0.3,0.29,0.28,0.28,0.27,0.27,0.27	NA			NA	NA	NA	NA	NA	NA	NA	NA			AT1G27950.1 | Symbols: LTPG1 | glycosylphosphatidylinositol-anchored lipid protein transfer 1
125924	LG10	12743377	12747609	g39913	PREDICTED: uncharacterized protein LOC104111685 [Nicotiana tomentosiformis]	NA	0.3,0.29,0.28,0.28,0.27,0.27,0.27	NA			NA	NA	NA	NA	NA	NA	NA	NA			NA
125956	LG10	12747873	12749592	g39914	PREDICTED: uncharacterized protein LOC104098435, partial [Nicotiana tomentosiformis]	NA	0.3,0.29,0.28,0.28,0.27,0.27	NA			NA	NA	NA	NA	NA	NA	NA	NA			NA
125976	LG10	12753147	12754976	g39915	PREDICTED: glucuronoxylan 4-O-methyltransferase 2-like [Solanum tuberosum]	NA	0.3,0.29,0.28,0.28,0.27,0.27	NA			NA	NA	NA	NA	NA	NA	NA	NA			AT1G67330.1 | Symbols: | Protein of unknown function (DUF579)
125987	LG10	12755774	12757222	g39916	LG10 AUGUSTUS gene 12755774 12757222 0.09 - .	NA	0.3,0.29,0.28,0.28,0.27	NA			NA	NA	NA	NA	NA	NA	NA	NA			NA
126001	LG10	12762927	12764892	g39917	PREDICTED: uncharacterized protein LOC104246050 [Nicotiana sylvestris]	NA	0.3,0.29,0.28,0.28,0.27	NA	Reverse transcriptase-like	Ribonuclease H domain	NA	NA	nucleic acid binding | RNA-DNA hybrid ribonuclease activity	NA	NA	NA	NA	NA			AT3G09510.1 | Symbols: | Ribonuclease H-like superfamily protein
126012	LG10	12766959	12769652	g39918	putative polyprotein [Solanum lycopersicum]	NA	0.3,0.29,0.28,0.27	NA			NA	NA	NA	NA	NA	NA	NA	NA			ATMG00810.1 | Symbols: ORF240B | DNA/RNA polymerases superfamily protein
126032	LG10	12776167	12778110	g39919	PREDICTED: uncharacterized protein LOC102590008 [Solanum tuberosum]	NA	0.3,0.29,0.27	NA			NA	NA	NA	NA	NA	NA	NA	NA			AT5G51920.1 | Symbols: | Pyridoxal phosphate (PLP)-dependent transferases superfamily protein
126046	LG10	12779101	12784142	g39920	LG10 AUGUSTUS gene 12779101 12784142 0.01 - .	NA	0.3,0.29,0.27	NA			NA	NA	NA	NA	NA	NA	NA	NA			NA
126084	LG10	12784638	12788102	g39921	LG10 AUGUSTUS gene 12784638 12788102 0.01 - .	NA	0.29,0.27	NA			NA	NA	NA	NA	NA	NA	NA	NA			NA
126107	LG10	12788528	12790262	g39922	LG10 AUGUSTUS gene 12788528 12790262 0.06 - .	NA	0.29,0.27	NA			NA	NA	NA	NA	NA	NA	NA	NA			NA
126122	LG10	12791057	12793429	g39923	PREDICTED: uncharacterized protein LOC104243072 isoform X1 [Nicotiana sylvestris]	NA	0.27	NA			NA	NA	NA	NA	NA	NA	NA	NA			AT1G27385.1 | Symbols: | unknown protein; FUNCTIONS IN: molecular_function unknown; INVOLVED IN: biological_process unknown; LOCATED IN: chloroplast; EXPRESSED IN: 24 plant structures; EXPRESSED DURING: 13 growth stages; CONTAINS InterPro DOMAIN/s: Protein of unknown function DUF493 (InterPro:IPR007454); Has 76 Blast hits to 76 proteins in 23 species: Archae - 0; Bacteria - 6; Metazoa - 0; Fungi …
126142	LG10	12795251	12802192	g39924	PREDICTED: uncharacterized protein LOC102599305 [Solanum tuberosum]	NA	0.27	NA			NA	NA	NA	NA	NA	NA	NA	NA			AT1G07040.1 | Symbols: | unknown protein; INVOLVED IN: biological_process unknown; LOCATED IN: chloroplast; EXPRESSED IN: 24 plant structures; EXPRESSED DURING: 14 growth stages; BEST Arabidopsis thaliana protein match is: unknown protein (TAIR:AT1G27030.1); Has 540 Blast hits to 538 proteins in 187 species: Archae - 0; Bacteria - 333; Metazoa - 0; Fungi - 0; Plants - 67; Viruses - 0; Other Eukar…
126175	LG10	12803167	12805988	g39925	PREDICTED: uncharacterized protein LOC104117869 isoform X1 [Nicotiana tomentosiformis]	NA	0.27	9.16			NA	NA	NA	NA	NA	NA	NA	NA			AT2G05642.1 | Symbols: | Nucleic acid-binding, OB-fold-like protein
126216	LG10	12808225	12813617	g39926	PREDICTED: uncharacterized protein LOC104249954 [Nicotiana sylvestris]	NA	NA	9.16			NA	NA	NA	NA	NA	NA	NA	NA			NA
126261	LG10	12815555	12818619	g39927	PREDICTED: ATP-dependent DNA helicase PIF1 {ECO:0000255|HAMAP-Rule:MF_03176}-like, partial [Nicotiana tomentosiformis]	NA	NA	9.16	PIF1-like helicase	DNA helicase Pif1-like	chromosome organization	NA	telomere maintenance | DNA helicase activity | DNA repair	K15255	PIF1; ATP-dependent DNA helicase PIF1 [EC:3.6.4.12]	A09180 Brite Hierarchies	09182 Protein families: genetic information processing	03032 DNA replication proteins [BR:ko03032]			AT3G51700.1 | Symbols: | PIF1 helicase
126278	LG10	12824415	12825951	g39928	PREDICTED: methyl-CpG-binding domain-containing protein 7-like [Solanum tuberosum]	NA	NA	9.16,5.83			NA	NA	NA	NA	NA	NA	NA	NA			NA
126287	LG10	12852115	12855026	g39929	PREDICTED: uncharacterized protein LOC102599305 [Solanum tuberosum]	NA	NA	9.16,5.83			NA	NA	NA	NA	NA	NA	NA	NA			AT1G07040.1 | Symbols: | unknown protein; INVOLVED IN: biological_process unknown; LOCATED IN: chloroplast; EXPRESSED IN: 24 plant structures; EXPRESSED DURING: 14 growth stages; BEST Arabidopsis thaliana protein match is: unknown protein (TAIR:AT1G27030.1); Has 540 Blast hits to 538 proteins in 187 species: Archae - 0; Bacteria - 333; Metazoa - 0; Fungi - 0; Plants - 67; Viruses - 0; Other Eukar…
126313	LG10	12856725	12859837	g39930	PREDICTED: alpha-ketoglutarate-dependent dioxygenase alkB [Nicotiana tomentosiformis]	NA	NA	9.16,5.83			NA	NA	NA	K10765	ALKBH1; alkylated DNA repair protein alkB homolog 1 [EC:1.14.11.51 4.2.99.18 1.14.11.-]	A09190 Not Included in Pathway or Brite	09191 Unclassified: metabolism	99980 Enzymes with EC numbers			AT1G11780.1 | Symbols: | oxidoreductase, 2OG-Fe(II) oxygenase family protein
126339	LG10	12865835	12871419	g39931	PREDICTED: probable arabinosyltransferase ARAD1 [Nicotiana sylvestris]	NA	NA	9.16,5.83			NA	NA	NA	NA	NA	NA	NA	NA			AT1G67410.1 | Symbols: | Exostosin family protein
126357	LG10	12910004	12911640	g39932	PREDICTED: ATP-dependent DNA helicase PIF1 {ECO:0000255|HAMAP-Rule:MF_03176}-like, partial [Nicotiana tomentosiformis]	NA	NA	9.16,5.83	PIF1-like helicase	DNA helicase Pif1-like	chromosome organization	NA	telomere maintenance | DNA helicase activity | DNA repair	NA	NA	NA	NA	NA			AT5G28780.1 | Symbols: | PIF1 helicase
126374	LG10	12912185	12919802	g39933	LG10 AUGUSTUS gene 12912185 12919802 0.01 + .	NA	NA	9.16,5.83			NA	NA	NA	NA	NA	NA	NA	NA			NA
126422	LG10	12919818	12925350	g39934	PREDICTED: uncharacterized protein LOC104218829, partial [Nicotiana sylvestris]	NA	NA	9.16,5.83			NA	NA	NA	NA	NA	NA	NA	NA			NA
126466	LG10	12927273	12929810	g39935	LG10 AUGUSTUS gene 12927273 12929810 0.05 - .	NA	NA	9.16,5.83			NA	NA	NA	NA	NA	NA	NA	NA			AT1G52950.1 | Symbols: | Nucleic acid-binding, OB-fold-like protein
126504	LG10	12930525	12934556	g39936	PREDICTED: uncharacterized protein LOC102599305 [Solanum tuberosum]	NA	NA	9.16,5.83			NA	NA	NA	NA	NA	NA	NA	NA			AT1G07040.1 | Symbols: | unknown protein; INVOLVED IN: biological_process unknown; LOCATED IN: chloroplast; EXPRESSED IN: 24 plant structures; EXPRESSED DURING: 14 growth stages; BEST Arabidopsis thaliana protein match is: unknown protein (TAIR:AT1G27030.1); Has 540 Blast hits to 538 proteins in 187 species: Archae - 0; Bacteria - 333; Metazoa - 0; Fungi - 0; Plants - 67; Viruses - 0; Other Eukar…
126531	LG10	12935275	12935928	g39937	LG10 AUGUSTUS gene 12935275 12935928 0.13 + .	NA	NA	9.16,5.83			NA	NA	NA	NA	NA	NA	NA	NA			NA
126542	LG10	12936493	12944880	g39938	PREDICTED: E3 ubiquitin-protein ligase CCNB1IP1 homolog isoform X3 [Solanum lycopersicum]	NA	NA	9.16,5.83			NA	NA	NA	NA	NA	NA	NA	NA			AT1G53490.1 | Symbols: | RING/U-box superfamily protein
126571	LG10	12950959	12953090	g39939	PREDICTED: uncharacterized protein LOC102590008 [Solanum tuberosum]	NA	NA	9.16,5.83			NA	NA	NA	NA	NA	NA	NA	NA			AT4G37100.1 | Symbols: | Pyridoxal phosphate (PLP)-dependent transferases superfamily protein
126585	LG10	12959252	12961390	g39940	PREDICTED: glucuronoxylan 4-O-methyltransferase 2-like [Solanum tuberosum]	NA	NA	9.16,5.83			NA	NA	NA	NA	NA	NA	NA	NA			AT1G67330.1 | Symbols: | Protein of unknown function (DUF579)
126596	LG10	12962225	12964950	g39941	LG10 AUGUSTUS gene 12962225 12964950 0.04 + .	NA	NA	9.16,5.83			NA	NA	NA	NA	NA	NA	NA	NA			NA
126614	LG10	12965325	12968806	g39942	PREDICTED: uncharacterized protein LOC105165052 [Sesamum indicum]	NA	NA	9.16,5.83			NA	NA	NA	NA	NA	NA	NA	NA			NA
126637	LG10	12969062	12969780	g39943	LG10 AUGUSTUS gene 12969062 12969780 0.13 - .	NA	NA	9.16,5.83			NA	NA	NA	NA	NA	NA	NA	NA			NA
126645	LG10	12975435	12978780	g39944	LG10 AUGUSTUS gene 12975435 12978780 0.02 + .	NA	NA	9.16,5.83			NA	NA	NA	NA	NA	NA	NA	NA			NA
126671	LG10	12993145	12996841	g39945	PREDICTED: non-specific lipid transfer protein GPI-anchored 1 [Nicotiana tomentosiformis]	NA	NA	5.83			NA	NA	NA	NA	NA	NA	NA	NA			AT1G27950.1 | Symbols: LTPG1 | glycosylphosphatidylinositol-anchored lipid protein transfer 1
126683	LG10	12998585	13009405	g39946	LG10 AUGUSTUS gene 12998585 13009405 0.01 + .	NA	NA	5.83			NA	NA	NA	NA	NA	NA	NA	NA			NA
126743	LG10	13010574	13011150	g39947	LG10 AUGUSTUS gene 13010574 13011150 0.22 - .	NA	NA	5.83			NA	NA	NA	NA	NA	NA	NA	NA			NA
128542	LG10	13647653	13649433	g40026	LG10 AUGUSTUS gene 13647653 13649433 0.06 + .	NA	NA	6.74			NA	NA	NA	NA	NA	NA	NA	NA			NA
128553	LG10	13657113	13661588	g40027	PREDICTED: uncharacterized protein LOC105161948 [Sesamum indicum]	NA	NA	6.74			NA	NA	NA	NA	NA	NA	NA	NA			NA
128577	LG10	13665039	13665778	g40028	PREDICTED: uncharacterized protein LOC102590323 [Solanum tuberosum]	NA	NA	6.74			NA	NA	NA	NA	NA	NA	NA	NA			AT5G43260.1 | Symbols: | chaperone protein dnaJ-related
128585	LG10	13670340	13676398	g40029	LG10 AUGUSTUS gene 13670340 13676398 0.01 - .	NA	NA	6.74			NA	NA	NA	NA	NA	NA	NA	NA			NA
128601	LG10	13681760	13687388	g40030	PREDICTED: zinc finger BED domain-containing protein RICESLEEPER 2-like [Nicotiana sylvestris]	NA	NA	6.74	Domain of unknown function (DUF4413)	hAT-like transposase, RNase-H fold	NA	NA	DNA binding	NA	NA	NA	NA	NA			NA
128640	LG10	13702473	13702983	g40031	LG10 AUGUSTUS gene 13702473 13702983 0.12 - .	NA	NA	6.74			NA	NA	NA	NA	NA	NA	NA	NA			NA
128648	LG10	13706248	13708378	g40032	PREDICTED: putative pumilio homolog 7, chloroplastic [Sesamum indicum]	NA	NA	6.74			NA	NA	NA	NA	NA	NA	NA	NA			NA
128668	LG10	13719564	13720193	g40033	LG10 AUGUSTUS gene 13719564 13720193 0.07 - .	NA	NA	6.74			NA	NA	NA	NA	NA	NA	NA	NA			NA
128676	LG10	13722050	13729333	g40034	PREDICTED: trihelix transcription factor GT-1-like isoform X1 [Solanum lycopersicum]	NA	NA	6.74			NA	NA	NA	NA	NA	NA	NA	NA			AT1G13450.1 | Symbols: GT-1 | Homeodomain-like superfamily protein
128712	LG10	13732288	13733100	g40035	LG10 AUGUSTUS gene 13732288 13733100 0.2 + .	NA	NA	7.63,6.74			NA	NA	NA	NA	NA	NA	NA	NA			NA
128723	LG10	13733264	13734893	g40036	LG10 AUGUSTUS gene 13733264 13734893 0.02 - .	NA	NA	7.63,6.74			NA	NA	NA	NA	NA	NA	NA	NA			NA
128732	LG10	13737778	13739046	g40037	LG10 AUGUSTUS gene 13737778 13739046 0.06 + .	NA	NA	7.63,6.74			NA	NA	NA	NA	NA	NA	NA	NA			NA
128746	LG10	13741759	13743843	g40038	LG10 AUGUSTUS gene 13741759 13743843 0.04 - .	NA	NA	7.63,6.74			NA	NA	NA	NA	NA	NA	NA	NA			NA
128763	LG10	13744228	13749059	g40039	LG10 AUGUSTUS gene 13744228 13749059 0.02 + .	NA	NA	7.63,6.74			NA	NA	NA	NA	NA	NA	NA	NA			NA
128772	LG10	13755768	13758293	g40040	PREDICTED: nuclear ribonuclease Z [Solanum lycopersicum]	NA	NA	7.63,6.74			NA	NA	NA	NA	NA	NA	NA	NA			AT1G74700.1 | Symbols: NUZ, TRZ1 | tRNAse Z1
128804	LG10	13768968	13771512	g40041	PREDICTED: nuclear ribonuclease Z [Solanum lycopersicum]	NA	NA	7.63,6.74			NA	NA	NA	NA	NA	NA	NA	NA			AT1G74700.1 | Symbols: NUZ, TRZ1 | tRNAse Z1
128833	LG10	13772289	13777733	g40042	PREDICTED: probable LRR receptor-like serine/threonine-protein kinase At3g47570 isoform X1 [Nicotiana tomentosiformis]	NA	NA	7.63,6.74	Leucine Rich repeat; Protein tyrosine and serine/threonine kinase	Leucine-rich repeat; Serine-threonine/tyrosine-protein kinase, catalytic domain	NA	NA	protein binding	NA	NA	NA	NA	NA			AT3G47570.1 | Symbols: | Leucine-rich repeat protein kinase family protein
128859	LG10	13780438	13785422	g40043	PREDICTED: nuclear ribonuclease Z [Solanum lycopersicum]	NA	NA	7.63,6.74			NA	NA	NA	K00784	rnz; ribonuclease Z [EC:3.1.26.11]	A09120 Genetic Information Processing	09122 Translation	03013 RNA transport [PATH:ko03013]			AT1G74700.1 | Symbols: NUZ, TRZ1 | tRNAse Z1
128892	LG10	13793348	13795923	g40044	PREDICTED: nuclear ribonuclease Z [Solanum lycopersicum]	NA	NA	7.63,6.74			NA	NA	NA	NA	NA	NA	NA	NA			AT1G74700.1 | Symbols: NUZ, TRZ1 | tRNAse Z1
128924	LG10	13798319	13811353	g40045	PREDICTED: succinate dehydrogenase [ubiquinone] flavoprotein subunit 1, mitochondrial [Solanum lycopersicum]	NA	NA	7.63,6.74			NA	NA	NA	NA	NA	NA	NA	NA			AT5G66760.1 | Symbols: SDH1-1 | succinate dehydrogenase 1-1
128951	LG10	13812119	13813503	g40046	LG10 AUGUSTUS gene 13812119 13813503 0.04 - .	NA	NA	7.63,6.74			NA	NA	NA	NA	NA	NA	NA	NA			NA
128959	LG10	13814298	13816119	g40047	LG10 AUGUSTUS gene 13814298 13816119 0.23 + .	NA	NA	7.63,6.74			NA	NA	NA	NA	NA	NA	NA	NA			NA
128968	LG10	13818413	13826703	g40048	LG10 AUGUSTUS gene 13818413 13826703 0.01 - .	NA	NA	7.63,6.74			NA	NA	NA	NA	NA	NA	NA	NA			NA
128986	LG10	13831894	13839553	g40049	PREDICTED: endoplasmic reticulum metallopeptidase 1 isoform X1 [Nicotiana sylvestris]	NA	NA	7.63			NA	NA	NA	NA	NA	NA	NA	NA			AT1G67420.1 | Symbols: | Zn-dependent exopeptidases superfamily protein
129039	LG10	13850501	13852203	g40050	PREDICTED: F-box protein At1g67340-like [Nicotiana tomentosiformis]	NA	NA	7.63			NA	NA	NA	NA	NA	NA	NA	NA			AT1G67340.1 | Symbols: | HCP-like superfamily protein with MYND-type zinc finger
129056	LG10	13856012	13857323	g40051	LG10 AUGUSTUS gene 13856012 13857323 0.08 - .	NA	NA	7.63			NA	NA	NA	NA	NA	NA	NA	NA			NA
129070	LG10	13864850	13868914	g40052	Polyprotein, putative [Solanum demissum]	NA	NA	7.63			NA	NA	NA	NA	NA	NA	NA	NA			AT4G23160.1 | Symbols: CRK8 | cysteine-rich RLK (RECEPTOR-like protein kinase) 8
129102	LG10	13869170	13872935	g40053	LG10 AUGUSTUS gene 13869170 13872935 0.01 - .	NA	NA	7.63			NA	NA	NA	NA	NA	NA	NA	NA			NA
129134	LG10	13874550	13878395	g40054	LG10 AUGUSTUS gene 13874550 13878395 0.01 - .	NA	NA	7.63			NA	NA	NA	NA	NA	NA	NA	NA			NA
129158	LG10	13885600	13889328	g40055	LG10 AUGUSTUS gene 13885600 13889328 0.01 + .	NA	NA	7.63			NA	NA	NA	NA	NA	NA	NA	NA			NA
129174	LG10	13894793	13896565	g40056	LG10 AUGUSTUS gene 13894793 13896565 0.24 - .	NA	NA	7.63			NA	NA	NA	NA	NA	NA	NA	NA			NA
129188	LG10	13896660	13899264	g40057	PREDICTED: nuclear ribonuclease Z [Solanum lycopersicum]	NA	NA	7.63			NA	NA	NA	K00784	rnz; ribonuclease Z [EC:3.1.26.11]	A09120 Genetic Information Processing	09122 Translation	03013 RNA transport [PATH:ko03013]			AT1G74700.1 | Symbols: NUZ, TRZ1 | tRNAse Z1
129217	LG10	13909780	13912414	g40058	PREDICTED: nuclear ribonuclease Z-like isoform X3 [Nicotiana tomentosiformis]	NA	NA	7.63			NA	NA	NA	NA	NA	NA	NA	NA			AT1G74700.1 | Symbols: NUZ, TRZ1 | tRNAse Z1
129243	LG10	13913114	13921195	g40059	PREDICTED: LRR receptor-like serine/threonine-protein kinase EFR [Sesamum indicum]	NA	NA	7.63	Leucine rich repeat; Protein kinase domain	Leucine-rich repeat; Protein kinase domain	NA	NA	protein binding	NA	NA	NA	NA	NA			AT3G47570.1 | Symbols: | Leucine-rich repeat protein kinase family protein
129263	LG10	13921450	13923000	g40060	LG10 AUGUSTUS gene 13921450 13923000 0.04 + .	NA	NA	7.63			NA	NA	NA	NA	NA	NA	NA	NA			NA
129277	LG10	13924016	13927775	g40061	PREDICTED: nuclear ribonuclease Z-like [Nicotiana sylvestris]	NA	NA	7.63			NA	NA	NA	NA	NA	NA	NA	NA			AT1G21280.1 | Symbols: | CONTAINS InterPro DOMAIN/s: Retrotransposon gag protein (InterPro:IPR005162); Has 707 Blast hits to 705 proteins in 25 species: Archae - 0; Bacteria - 0; Metazoa - 4; Fungi - 0; Plants - 703; Viruses - 0; Other Eukaryotes - 0 (source: NCBI BLink).
136163	LG10	16206840	16209809	g40387	LG10 AUGUSTUS gene 16206840 16209809 0.01 + .	NA	NA	4.81			NA	NA	NA	NA	NA	NA	NA	NA			NA
136192	LG10	16209831	16212685	g40388	LG10 AUGUSTUS gene 16209831 16212685 0.02 - .	NA	NA	4.81			NA	NA	NA	NA	NA	NA	NA	NA			NA
136210	LG10	16214142	16215055	g40389	LG10 AUGUSTUS gene 16214142 16215055 0.06 - .	NA	NA	4.81			NA	NA	NA	NA	NA	NA	NA	NA			NA
136221	LG10	16215150	16221240	g40390	PREDICTED: F-box protein PP2-B13-like [Nicotiana tomentosiformis]	NA	NA	4.81			NA	NA	NA	NA	NA	NA	NA	NA			AT1G56240.1 | Symbols: AtPP2-B13, PP2-B13 | phloem protein 2-B13
136253	LG10	16222904	16227665	g40391	PREDICTED: uncharacterized protein LOC104104575 [Nicotiana tomentosiformis]	NA	NA	4.81			NA	NA	NA	NA	NA	NA	NA	NA			AT5G27290.2 | Symbols: | unknown protein; LOCATED IN: chloroplast; EXPRESSED IN: 22 plant structures; EXPRESSED DURING: 13 growth stages; BEST Arabidopsis thaliana protein match is: unknown protein (TAIR:AT1G54680.3); Has 199 Blast hits to 194 proteins in 57 species: Archae - 0; Bacteria - 61; Metazoa - 0; Fungi - 0; Plants - 129; Viruses - 0; Other Eukaryotes - 9 (source: NCBI BLink).
136279	LG10	16231231	16236465	g40392	LG10 AUGUSTUS gene 16231231 16236465 0.18 - .	NA	NA	4.81			NA	NA	NA	NA	NA	NA	NA	NA			NA
136311	LG10	16244050	16247316	g40393	PREDICTED: ethylene-responsive transcription factor ERF069-like [Sesamum indicum]	NA	NA	4.81			NA	NA	NA	NA	NA	NA	NA	NA			AT4G27950.1 | Symbols: CRF4 | cytokinin response factor 4
136334	LG10	16248770	16249798	g40394	LG10 AUGUSTUS gene 16248770 16249798 0.47 + .	NA	NA	4.81			NA	NA	NA	NA	NA	NA	NA	NA			NA
136345	LG10	16259072	16262695	g40395	PREDICTED: methyl-CpG-binding domain-containing protein 4-like [Sesamum indicum]	NA	NA	4.81			NA	NA	NA	NA	NA	NA	NA	NA			AT4G22745.1 | Symbols: MBD1 | methyl-CPG-binding domain 1
136371	LG10	16267281	16272435	g40396	PREDICTED: uncharacterized protein LOC105167219 [Sesamum indicum]	NA	NA	4.81	Reverse transcriptase-like	Ribonuclease H domain	NA	NA	nucleic acid binding | RNA-DNA hybrid ribonuclease activity	NA	NA	NA	NA	NA			AT4G29090.1 | Symbols: | Ribonuclease H-like superfamily protein
136388	LG10	16273540	16274356	g40397	PREDICTED: probable pectinesterase/pectinesterase inhibitor 41-like [Solanum tuberosum]	NA	NA	4.81			NA	NA	NA	NA	NA	NA	NA	NA			NA
136396	LG10	16277980	16279280	g40398	LG10 AUGUSTUS gene 16277980 16279280 0.05 + .	NA	NA	4.81			NA	NA	NA	NA	NA	NA	NA	NA			NA
136413	LG10	16282750	16284871	g40399	PREDICTED: pectinesterase-like [Nicotiana sylvestris]	NA	NA	4.81	Plant invertase/pectin methylesterase inhibitor	Pectinesterase inhibitor domain	NA	NA	enzyme inhibitor activity	NA	NA	NA	NA	NA			AT5G27870.1 | Symbols: | Plant invertase/pectin methylesterase inhibitor superfamily
136430	LG10	16298070	16305535	g40400	LG10 AUGUSTUS gene 16298070 16305535 0.01 + .	NA	NA	4.81			NA	NA	NA	NA	NA	NA	NA	NA			NA
136451	LG10	16309720	16314747	g40401	PREDICTED: probable carbohydrate esterase At4g34215 [Nicotiana tomentosiformis]	NA	NA	4.81			NA	NA	NA	NA	NA	NA	NA	NA			NA
136466	LG10	16322890	16324415	g40402	LG10 AUGUSTUS gene 16322890 16324415 0.01 - .	NA	NA	4.81			NA	NA	NA	NA	NA	NA	NA	NA			NA
136486	LG10	16337326	16347623	g40403	PREDICTED: uncharacterized protein LOC104227677 [Nicotiana sylvestris]	NA	NA	4.81	PIF1-like helicase	DNA helicase Pif1-like	chromosome organization	NA	telomere maintenance | DNA helicase activity | DNA repair	NA	NA	NA	NA	NA			AT5G28780.1 | Symbols: | PIF1 helicase
136502	LG10	16350498	16351693	g40404	LG10 AUGUSTUS gene 16350498 16351693 0.04 - .	NA	NA	4.81			NA	NA	NA	NA	NA	NA	NA	NA			NA
136514	LG10	16390412	16391423	g40405	PREDICTED: NAC transcription factor 25 [Sesamum indicum]	NA	NA	4.81	No apical meristem (NAM) protein	NAC domain	NA	NA	DNA binding | regulation of transcription, DNA-templated	NA	NA	NA	NA	NA			AT5G13180.1 | Symbols: ANAC083, VNI2, NAC083 | NAC domain containing protein 83
136528	LG10	16395368	16396373	g40406	PREDICTED: NAC transcription factor 25 [Sesamum indicum]	NA	NA	4.81	No apical meristem (NAM) protein	NAC domain	NA	NA	DNA binding | regulation of transcription, DNA-templated	NA	NA	NA	NA	NA			AT5G13180.1 | Symbols: ANAC083, VNI2, NAC083 | NAC domain containing protein 83
143416	LG10	18640703	18642483	g40715	LG10 AUGUSTUS gene 18640703 18642483 0.05 - .	NA	NA	4.94			NA	NA	NA	NA	NA	NA	NA	NA			NA
143433	LG10	18651648	18655787	g40716	PREDICTED: uncharacterized protein LOC102600303 [Solanum tuberosum]	NA	NA	4.94	SWIM zinc finger	Zinc finger, SWIM-type	NA	NA	zinc ion binding	NA	NA	NA	NA	NA			AT1G64260.1 | Symbols: | MuDR family transposase
143459	LG10	18657098	18660239	g40717	PREDICTED: uncharacterized protein LOC104217182 [Nicotiana sylvestris]	NA	NA	4.94			NA	NA	NA	NA	NA	NA	NA	NA			NA
143474	LG10	18660878	18663753	g40718	LG10 AUGUSTUS gene 18660878 18663753 0.03 - .	NA	NA	4.94			NA	NA	NA	NA	NA	NA	NA	NA			NA
143492	LG10	18665188	18672987	g40719	PREDICTED: uncharacterized protein LOC104099400, partial [Nicotiana tomentosiformis]	NA	NA	4.94			NA	NA	NA	NA	NA	NA	NA	NA			AT4G23160.1 | Symbols: CRK8 | cysteine-rich RLK (RECEPTOR-like protein kinase) 8
143525	LG10	18674398	18675716	g40720	LG10 AUGUSTUS gene 18674398 18675716 0.03 + .	NA	NA	4.94			NA	NA	NA	NA	NA	NA	NA	NA			NA
143539	LG10	18675756	18680743	g40721	PREDICTED: uncharacterized protein LOC104229636 [Nicotiana sylvestris]	NA	NA	4.94			NA	NA	NA	NA	NA	NA	NA	NA			NA
143569	LG10	18683657	18687363	g40722	PREDICTED: retrovirus-related Pol polyprotein from transposon TNT 1-94 [Sesamum indicum]	NA	NA	4.94			NA	NA	NA	NA	NA	NA	NA	NA			NA
143592	LG10	18692158	18693863	g40723	LG10 AUGUSTUS gene 18692158 18693863 0.27 + .	NA	NA	4.94			NA	NA	NA	NA	NA	NA	NA	NA			NA
143604	LG10	18693885	18712723	g40724	PREDICTED: carotenoid 9,10(9',10')-cleavage dioxygenase 1-like [Solanum lycopersicum]	NA	NA	4.94	Retinal pigment epithelial membrane protein	Carotenoid oxygenase	NA	NA	oxidoreductase activity, acting on single donors with incorporation of molecular oxygen, incorporation of two atoms of oxygen | oxidation-reduction process	NA	NA	NA	NA	NA			AT3G63520.1 | Symbols: CCD1, ATCCD1, ATNCED1, NCED1 | carotenoid cleavage dioxygenase 1
143641	LG10	18716508	18718111	g40725	PREDICTED: uncharacterized protein LOC104085354 [Nicotiana tomentosiformis]	NA	NA	4.94			NA	NA	NA	NA	NA	NA	NA	NA			NA
143655	LG10	18718375	18721243	g40726	LG10 AUGUSTUS gene 18718375 18721243 0.01 - .	NA	NA	4.94			NA	NA	NA	NA	NA	NA	NA	NA			NA
143667	LG10	18732458	18736542	g40727	PREDICTED: pentatricopeptide repeat-containing protein At1g14470 [Nicotiana tomentosiformis]	NA	NA	4.94	DYW family of nucleic acid deaminases	DYW domain	NA	NA	zinc ion binding	NA	NA	NA	NA	NA			AT1G14470.1 | Symbols: | Pentatricopeptide repeat (PPR) superfamily protein
143681	LG10	18748368	18750287	g40728	PREDICTED: high affinity nitrate transporter 2.5 [Sesamum indicum]	NA	NA	4.94	Major Facilitator Superfamily	Major facilitator superfamily	NA	NA	transmembrane transporter activity | transmembrane transport	K02575	NRT, narK, nrtP, nasA; MFS transporter, NNP family, nitrate/nitrite transporter	A09100 Metabolism	09102 Energy metabolism	00910 Nitrogen metabolism [PATH:ko00910]			AT1G12940.1 | Symbols: ATNRT2.5, NRT2.5 | nitrate transporter2.5
143692	LG10	18754840	18757574	g40729	LG10 AUGUSTUS gene 18754840 18757574 0.01 - .	NA	NA	4.94			NA	NA	NA	NA	NA	NA	NA	NA			NA
143709	LG10	18758920	18765354	g40730	PREDICTED: lysM domain receptor-like kinase 3 [Nicotiana sylvestris]	NA	NA	4.94	Protein kinase domain	Protein kinase domain	NA	NA	protein kinase activity | ATP binding | protein phosphorylation	NA	NA	NA	NA	NA			AT1G51940.1 | Symbols: | protein kinase family protein / peptidoglycan-binding LysM domain-containing protein
143744	LG10	18768289	18769356	g40731	LG10 AUGUSTUS gene 18768289 18769356 0.09 + .	NA	NA	4.94			NA	NA	NA	NA	NA	NA	NA	NA			NA
143752	LG10	18770935	18773664	g40732	PREDICTED: uncharacterized protein LOC104114984 [Nicotiana tomentosiformis]	NA	NA	4.94			NA	NA	NA	NA	NA	NA	NA	NA			AT1G10710.2 | Symbols: PHS1 | poor homologous synapsis 1
143772	LG10	18778289	18778897	g40733	LG10 AUGUSTUS gene 18778289 18778897 0.02 + .	NA	NA	4.94			NA	NA	NA	NA	NA	NA	NA	NA			NA
143780	LG10	18779588	18781084	g40734	Polyprotein, putative [Solanum demissum]	NA	NA	4.94			NA	NA	NA	NA	NA	NA	NA	NA			AT4G23160.1 | Symbols: CRK8 | cysteine-rich RLK (RECEPTOR-like protein kinase) 8
143791	LG10	18784267	18787884	g40735	PREDICTED: ATP-dependent DNA helicase PIF1-like [Nicotiana sylvestris]	NA	NA	4.94	PIF1-like helicase	DNA helicase Pif1-like	chromosome organization	NA	telomere maintenance | DNA helicase activity | DNA repair	NA	NA	NA	NA	NA			AT5G28780.1 | Symbols: | PIF1 helicase
143809	LG10	18789568	18793154	g40736	PREDICTED: uncharacterized protein LOC105162761 [Sesamum indicum]	NA	NA	4.94			NA	NA	NA	NA	NA	NA	NA	NA			ATMG00310.1 | Symbols: ORF154 | RNA-directed DNA polymerase (reverse transcriptase)-related family protein
143850	LG10	18802759	18811547	g40737	PREDICTED: uncharacterized protein LOC101259530 isoform X2 [Solanum lycopersicum]	NA	NA	4.94			NA	NA	NA	NA	NA	NA	NA	NA			AT1G70570.1 | Symbols: | anthranilate phosphoribosyltransferase, putative
143886	LG10	18815459	18819656	g40738	PREDICTED: F-box protein At1g70590 isoform X1 [Nicotiana tomentosiformis]	NA	NA	4.94,4.64			NA	NA	NA	NA	NA	NA	NA	NA			AT1G70590.1 | Symbols: | F-box family protein
143909	LG10	18819962	18826124	g40739	PREDICTED: copper amine oxidase 1-like [Nicotiana tomentosiformis]	NA	NA	4.94,4.64	Copper amine oxidase, enzyme domain	Copper amine oxidase, catalytic domain	NA	NA	copper ion binding | primary amine oxidase activity | amine metabolic process | quinone binding | oxidation-reduction process	K00276	AOC3, AOC2, tynA; primary-amine oxidase [EC:1.4.3.21]	A09100 Metabolism	09105 Amino acid metabolism	00260 Glycine, serine and threonine metabolism [PATH:ko00260]			AT2G42490.1 | Symbols: | Copper amine oxidase family protein
143950	LG10	18828589	18832815	g40740	PREDICTED: zinc finger BED domain-containing protein RICESLEEPER 2-like [Nicotiana sylvestris]	NA	NA	4.64	hAT family C-terminal dimerisation region; Domain of unknown function (DUF4413)	HAT, C-terminal dimerisation domain; hAT-like transposase, RNase-H fold	NA	NA	protein dimerization activity	NA	NA	NA	NA	NA			AT3G42170.1 | Symbols: | BED zinc finger ;hAT family dimerisation domain
143972	LG10	18846149	18863258	g40741	LG10 AUGUSTUS gene 18846149 18863258 0.01 + .	NA	NA	4.64			NA	NA	NA	NA	NA	NA	NA	NA			NA
143993	LG10	18867389	18868463	g40742	LG10 AUGUSTUS gene 18867389 18868463 0.12 + .	NA	NA	4.64			NA	NA	NA	NA	NA	NA	NA	NA			NA
144001	LG10	18868939	18869640	g40743	LG10 AUGUSTUS gene 18868939 18869640 0.05 + .	NA	NA	4.64			NA	NA	NA	NA	NA	NA	NA	NA			NA
144015	LG10	18874919	18890246	g40744	PREDICTED: ABC transporter B family member 26, chloroplastic [Nicotiana sylvestris]	NA	NA	4.64	ABC transporter transmembrane region; ABC transporter	ABC transporter type 1, transmembrane domain; ABC transporter-like	NA	NA	ATP binding | integral component of membrane | ATPase activity, coupled to transmembrane movement of substances | transmembrane transport	NA	NA	NA	NA	NA			AT1G70610.1 | Symbols: ATTAP1, TAP1 | transporter associated with antigen processing protein 1
144085	LG10	18894639	18897349	g40745	PREDICTED: putative nuclease HARBI1 [Nicotiana sylvestris]	NA	NA	4.64	Plant transposon protein	Harbinger transposase-derived protein	NA	NA	hydrolase activity, acting on ester bonds	NA	NA	NA	NA	NA			AT2G13770.1 | Symbols: | CONTAINS InterPro DOMAIN/s: Putative harbinger transposase-derived nuclease (InterPro:IPR006912); Has 451 Blast hits to 352 proteins in 33 species: Archae - 0; Bacteria - 0; Metazoa - 28; Fungi - 8; Plants - 388; Viruses - 0; Other Eukaryotes - 27 (source: NCBI BLink).
144105	LG10	18897397	18898154	g40746	PREDICTED: uncharacterized protein LOC105179298 [Sesamum indicum]	NA	NA	4.64			NA	NA	NA	NA	NA	NA	NA	NA			NA
144113	LG10	18898499	18900938	g40747	PREDICTED: uncharacterized protein LOC105180202 [Sesamum indicum]	NA	NA	4.64			NA	NA	NA	NA	NA	NA	NA	NA			NA
144139	LG10	18906451	18909244	g40748	LG10 AUGUSTUS gene 18906451 18909244 0.03 - .	NA	NA	4.64			NA	NA	NA	NA	NA	NA	NA	NA			NA
144168	LG10	18909409	18911737	g40749	LG10 AUGUSTUS gene 18909409 18911737 0.02 + .	NA	NA	4.64			NA	NA	NA	NA	NA	NA	NA	NA			NA
144185	LG10	18916249	18918927	g40750	LG10 AUGUSTUS gene 18916249 18918927 0.03 + .	NA	NA	4.64			NA	NA	NA	NA	NA	NA	NA	NA			NA
144203	LG10	18924471	18930622	g40751	LG10 AUGUSTUS gene 18924471 18930622 0.01 + .	NA	NA	4.64			NA	NA	NA	NA	NA	NA	NA	NA			NA
144236	LG10	18935271	18942836	g40752	PREDICTED: uncharacterized protein LOC104214101 isoform X1 [Nicotiana sylvestris]	NA	NA	4.64			NA	NA	NA	K20892	RAY1; beta-arabinofuranosyltransferase [EC:2.4.2.-]	A09180 Brite Hierarchies	09181 Protein families: metabolism	01003 Glycosyltransferases [BR:ko01003]			NA
144280	LG10	18944891	18949695	g40753	PREDICTED: uncharacterized protein LOC104106982 isoform X1 [Nicotiana tomentosiformis]	NA	NA	4.64			NA	NA	NA	K20892	RAY1; beta-arabinofuranosyltransferase [EC:2.4.2.-]	A09180 Brite Hierarchies	09181 Protein families: metabolism	01003 Glycosyltransferases [BR:ko01003]			AT1G70630.1 | Symbols: | Nucleotide-diphospho-sugar transferase family protein
144309	LG10	18949988	18953846	g40754	PREDICTED: inorganic phosphate transporter 2-1, chloroplastic-like [Nicotiana sylvestris]	NA	NA	4.64	Phosphate transporter family	Phosphate transporter	NA	NA	inorganic phosphate transmembrane transporter activity | phosphate ion transport | membrane	K03306	TC.PIT; inorganic phosphate transporter, PiT family	A09190 Not Included in Pathway or Brite	09193 Unclassified: signaling and cellular processes	99977 Transport			AT3G26570.2 | Symbols: PHT2;1, ORF02 | phosphate transporter 2;1
144335	LG10	18960058	18968386	g40755	LG10 AUGUSTUS gene 18960058 18968386 0.02 - .	NA	NA	4.64			NA	NA	NA	NA	NA	NA	NA	NA			NA
144348	LG10	18987571	18990306	g40756	LG10 AUGUSTUS gene 18987571 18990306 0.07 - .	NA	NA	4.64			NA	NA	NA	NA	NA	NA	NA	NA			NA
144357	LG10	18991021	18991603	g40757	LG10 AUGUSTUS gene 18991021 18991603 0.03 + .	NA	NA	4.64			NA	NA	NA	NA	NA	NA	NA	NA			NA
144365	LG10	18994265	18999856	g40758	Polyprotein, 3'-partial, putative, partial [Solanum demissum]	NA	NA	4.64	Zinc knuckle	Zinc finger, CCHC-type	NA	NA	nucleic acid binding | zinc ion binding	NA	NA	NA	NA	NA			ATMG00860.1 | Symbols: ORF158 | DNA/RNA polymerases superfamily protein
144391	LG10	19000359	19006756	g40759	LG10 AUGUSTUS gene 19000359 19006756 0.01 - .	NA	NA	4.64			NA	NA	NA	NA	NA	NA	NA	NA			NA
145040	LG10	19220413	19222224	g40787	LG10 AUGUSTUS gene 19220413 19222224 0.38 + .	1.49	NA	NA			NA	NA	NA	NA	NA	NA	NA	NA			NA
145049	LG10	19223274	19224868	g40788	PREDICTED: uncharacterized protein LOC104221303 [Nicotiana sylvestris]	1.49	NA	NA			NA	NA	NA	NA	NA	NA	NA	NA			AT4G29090.1 | Symbols: | Ribonuclease H-like superfamily protein
145063	LG10	19241375	19249448	g40789	PREDICTED: uncharacterized protein LOC101249672 [Solanum lycopersicum]	1.53,1.49	NA	6.68			NA	NA	NA	NA	NA	NA	NA	NA			NA
145073	LG10	19252526	19253408	g40790	PREDICTED: putative uncharacterized protein DDB_G0291812 [Solanum lycopersicum]	1.53,1.49	NA	6.68			NA	NA	NA	NA	NA	NA	NA	NA			AT4G17810.1 | Symbols: | C2H2 and C2HC zinc fingers superfamily protein
145081	LG10	19262583	19263437	g40791	LG10 AUGUSTUS gene 19262583 19263437 0.01 + .	1.53,1.49	NA	6.68			NA	NA	NA	NA	NA	NA	NA	NA			NA
145089	LG10	19267177	19280316	g40792	PREDICTED: uncharacterized protein LOC104234221 [Nicotiana sylvestris]	1.53,1.49	NA	6.68			NA	NA	NA	NA	NA	NA	NA	NA			AT2G01050.1 | Symbols: | zinc ion binding;nucleic acid binding
145137	LG10	19283567	19286865	g40793	LG10 AUGUSTUS gene 19283567 19286865 0.01 + .	1.53,1.49	NA	6.68			NA	NA	NA	NA	NA	NA	NA	NA			NA
145149	LG10	19316112	19316702	g40794	LG10 AUGUSTUS gene 19316112 19316702 0.09 - .	1.53	NA	6.68			NA	NA	NA	NA	NA	NA	NA	NA			NA
145157	LG10	19320337	19321140	g40795	LG10 AUGUSTUS gene 19320337 19321140 0.01 + .	1.53	NA	6.68			NA	NA	NA	NA	NA	NA	NA	NA			NA
145168	LG10	19321166	19322802	g40796	LG10 AUGUSTUS gene 19321166 19322802 0.05 - .	1.53	NA	6.68			NA	NA	NA	NA	NA	NA	NA	NA			NA
145188	LG10	19323307	19326355	g40797	LG10 AUGUSTUS gene 19323307 19326355 0.01 + .	1.53	NA	6.68			NA	NA	NA	NA	NA	NA	NA	NA			NA
145200	LG10	19333038	19335092	g40798	S-adenosyl-L-methionine:salicylic acid carboxyl methyltransferase [Nicotiana alata]	NA	NA	6.68	SAM dependent carboxyl methyltransferase	SAM dependent carboxyl methyltransferase	NA	NA	methyltransferase activity	K21483	SAMT; salicylate 1-O-methyltransferase [EC:2.1.1.274]	A09190 Not Included in Pathway or Brite	09191 Unclassified: metabolism	99980 Enzymes with EC numbers			AT3G11480.1 | Symbols: BSMT1, ATBSMT1 | S-adenosyl-L-methionine-dependent methyltransferases superfamily protein
145217	LG10	19335873	19340812	g40799	PREDICTED: uncharacterized protein LOC104221303 [Nicotiana sylvestris]	NA	NA	6.68			NA	NA	NA	NA	NA	NA	NA	NA			AT4G29090.1 | Symbols: | Ribonuclease H-like superfamily protein
145258	LG10	19346338	19349222	g40800	LG10 AUGUSTUS gene 19346338 19349222 0.01 - .	NA	NA	6.68			NA	NA	NA	NA	NA	NA	NA	NA			NA
145270	LG10	19349834	19351272	g40801	Retrotransposon gag protein [Solanum demissum]	NA	NA	6.68			NA	NA	NA	NA	NA	NA	NA	NA			NA
145287	LG10	19351948	19357262	g40802	PREDICTED: uncharacterized protein LOC104094324 [Nicotiana tomentosiformis]	NA	NA	6.68			NA	NA	NA	NA	NA	NA	NA	NA			NA
145314	LG10	19357877	19359162	g40803	LG10 AUGUSTUS gene 19357877 19359162 0.22 + .	NA	NA	6.68			NA	NA	NA	NA	NA	NA	NA	NA			NA
145322	LG10	19362837	19364582	g40804	PREDICTED: galactoside 2-alpha-L-fucosyltransferase-like [Nicotiana tomentosiformis]	NA	NA	6.68			NA	NA	NA	NA	NA	NA	NA	NA			AT4G23160.1 | Symbols: CRK8 | cysteine-rich RLK (RECEPTOR-like protein kinase) 8
145331	LG10	19368547	19369878	g40805	PREDICTED: lon protease homolog 2, peroxisomal {ECO:0000255|HAMAP-Rule:MF_03121} isoform X1 [Nicotiana tomentosiformis]	NA	NA	6.68			NA	NA	NA	NA	NA	NA	NA	NA			AT5G47040.1 | Symbols: LON2 | lon protease 2
145351	LG10	19374467	19379542	g40806	disease resistance protein RX5 [Solanum stenotomum]	NA	NA	6.68	NB-ARC domain	NB-ARC	NA	NA	ADP binding	NA	NA	NA	NA	NA			AT3G46530.1 | Symbols: RPP13 | NB-ARC domain-containing disease resistance protein
145368	LG10	19382647	19383561	g40807	PREDICTED: protein FAR-RED ELONGATED HYPOCOTYL 3 isoform X1 [Sesamum indicum]	NA	NA	6.68			NA	NA	NA	NA	NA	NA	NA	NA			AT4G15090.1 | Symbols: FAR1 | FRS (FAR1 Related Sequences) transcription factor family
145376	LG10	19386133	19388162	g40808	LG10 AUGUSTUS gene 19386133 19388162 0.03 - .	NA	NA	6.68			NA	NA	NA	NA	NA	NA	NA	NA			NA
145393	LG10	19388277	19393552	g40809	PREDICTED: uncharacterized protein LOC101262243 [Solanum lycopersicum]	NA	NA	6.68			NA	NA	NA	NA	NA	NA	NA	NA			ATMG00810.1 | Symbols: ORF240B | DNA/RNA polymerases superfamily protein
145434	LG10	19394187	19398157	g40810	LG10 AUGUSTUS gene 19394187 19398157 0.22 + .	NA	NA	6.68			NA	NA	NA	NA	NA	NA	NA	NA			NA
145460	LG10	19399884	19404192	g40811	PREDICTED: homeobox protein knotted-1-like 6 [Sesamum indicum]	NA	NA	6.68	Homeobox KN domain; ELK domain	Homeobox KN domain; ELK domain	NA	NA	DNA binding | regulation of transcription, DNA-templated	NA	NA	NA	NA	NA			AT1G23380.1 | Symbols: KNAT6, KNAT6L, KNAT6S | KNOTTED1-like homeobox gene 6
145476	LG10	19408152	19412422	g40812	PREDICTED: homeobox protein knotted-1-like 6 [Nicotiana sylvestris]	NA	NA	6.68	KNOX1 domain	KNOX1	NA	NA	DNA binding | nucleus	NA	NA	NA	NA	NA			AT1G23380.1 | Symbols: KNAT6, KNAT6L, KNAT6S | KNOTTED1-like homeobox gene 6
146925	LG10	19920510	19935336	g40879	PREDICTED: LOW QUALITY PROTEIN: uncharacterized protein LOC104223244 [Nicotiana sylvestris]	NA	NA	6.85	Reverse transcriptase-like	Ribonuclease H domain	NA	NA	nucleic acid binding | RNA-DNA hybrid ribonuclease activity	NA	NA	NA	NA	NA			AT4G23160.1 | Symbols: CRK8 | cysteine-rich RLK (RECEPTOR-like protein kinase) 8
146991	LG10	19940041	19945291	g40880	PREDICTED: pantothenate kinase 1 [Sesamum indicum]	NA	NA	6.85	Fumble	Type II pantothenate kinase	NA	NA	pantothenate kinase activity | ATP binding | coenzyme A biosynthetic process	K09680	PANK1_2_3, CAB1, coaW; type II pantothenate kinase [EC:2.7.1.33]	A09100 Metabolism	09108 Metabolism of cofactors and vitamins	00770 Pantothenate and CoA biosynthesis [PATH:ko00770]			NA
147035	LG10	19946131	19954676	g40881	PREDICTED: uncharacterized protein LOC105179848 [Sesamum indicum]	NA	NA	6.85	Reverse transcriptase-like	Ribonuclease H domain	NA	NA	nucleic acid binding | RNA-DNA hybrid ribonuclease activity	NA	NA	NA	NA	NA			AT1G43760.1 | Symbols: | DNAse I-like superfamily protein
147085	LG10	19955471	19959409	g40882	LG10 AUGUSTUS gene 19955471 19959409 0.03 + .	NA	NA	6.85			NA	NA	NA	NA	NA	NA	NA	NA			NA
147096	LG10	19962304	19963256	g40883	PREDICTED: DNA ligase 1-like [Nicotiana sylvestris]	NA	NA	6.85			NA	NA	NA	NA	NA	NA	NA	NA			AT1G70420.1 | Symbols: | Protein of unknown function (DUF1645)
147104	LG10	19967809	19969316	g40884	LG10 AUGUSTUS gene 19967809 19969316 0.07 - .	NA	NA	6.85			NA	NA	NA	NA	NA	NA	NA	NA			NA
147116	LG10	19978551	19989891	g40885	PREDICTED: uncharacterized protein LOC105167219 [Sesamum indicum]	NA	NA	6.85	Reverse transcriptase-like	Ribonuclease H domain	NA	NA	nucleic acid binding | RNA-DNA hybrid ribonuclease activity	NA	NA	NA	NA	NA			AT1G43760.1 | Symbols: | DNAse I-like superfamily protein
147169	LG10	19998436	20004384	g40886	Polyprotein, putative [Solanum demissum]	NA	NA	6.85			NA	NA	NA	NA	NA	NA	NA	NA			AT4G23160.1 | Symbols: CRK8 | cysteine-rich RLK (RECEPTOR-like protein kinase) 8
147210	LG10	20006064	20006984	g40887	PREDICTED: uncharacterized protein LOC104119047 [Nicotiana tomentosiformis]	NA	NA	6.85			NA	NA	NA	NA	NA	NA	NA	NA			NA
147218	LG10	20029349	20030035	g40888	PREDICTED: uncharacterized protein LOC104116463 [Nicotiana tomentosiformis]	NA	NA	6.85			NA	NA	NA	NA	NA	NA	NA	NA			AT1G70480.2 | Symbols: | Domain of unknown function (DUF220)
147229	LG10	20030227	20031114	g40889	LG10 AUGUSTUS gene 20030227 20031114 0.07 - .	NA	NA	6.85			NA	NA	NA	NA	NA	NA	NA	NA			NA
147240	LG10	20031409	20033628	g40890	PREDICTED: uncharacterized protein LOC104230446 [Nicotiana sylvestris]	NA	NA	6.85			NA	NA	NA	NA	NA	NA	NA	NA			AT1G70480.1 | Symbols: | Domain of unknown function (DUF220)
147257	LG10	20034499	20038340	g40891	RecName: Full=2-methylene-furan-3-one reductase; AltName: Full=Enone oxidoreductase; Short=SlEO; Flags: Precursor	NA	NA	6.85	Alcohol dehydrogenase GroES-like domain	Alcohol dehydrogenase, N-terminal	NA	NA	oxidation-reduction process	K18980	EO, FaQR; 2-methylene-furan-3-one reductase [EC:1.3.1.105]	A09190 Not Included in Pathway or Brite	09191 Unclassified: metabolism	99980 Enzymes with EC numbers			AT1G23740.1 | Symbols: | Oxidoreductase, zinc-binding dehydrogenase family protein
147277	LG10	20044109	20044546	g40892	LG10 AUGUSTUS gene 20044109 20044546 0.17 + .	NA	NA	6.85			NA	NA	NA	NA	NA	NA	NA	NA			NA
147285	LG10	20065793	20068544	g40893	PREDICTED: uncharacterized protein LOC104099639 [Nicotiana tomentosiformis]	NA	NA	6.85			NA	NA	NA	NA	NA	NA	NA	NA			AT4G23160.1 | Symbols: CRK8 | cysteine-rich RLK (RECEPTOR-like protein kinase) 8
147308	LG10	20069100	20074034	g40894	PREDICTED: uncharacterized protein LOC101265225 [Solanum lycopersicum]	NA	NA	6.85			NA	NA	NA	NA	NA	NA	NA	NA			NA
147328	LG10	20075349	20075731	g40895	LG10 AUGUSTUS gene 20075349 20075731 0.15 + .	NA	NA	6.85			NA	NA	NA	NA	NA	NA	NA	NA			NA
147336	LG10	20082199	20083946	g40896	LG10 AUGUSTUS gene 20082199 20083946 0.05 + .	NA	NA	6.85			NA	NA	NA	NA	NA	NA	NA	NA			NA
147348	LG10	20085469	20092341	g40897	PREDICTED: polygalacturonase-1 non-catalytic subunit beta-like [Nicotiana sylvestris]	NA	NA	6.85			NA	NA	NA	NA	NA	NA	NA	NA			AT1G70370.2 | Symbols: PG2 | polygalacturonase 2
147363	LG10	20097197	20098284	g40898	PREDICTED: ATP-dependent DNA helicase PIF1 {ECO:0000255|HAMAP-Rule:MF_03176}-like, partial [Nicotiana tomentosiformis]	NA	NA	6.85	PIF1-like helicase	DNA helicase Pif1-like	chromosome organization	NA	telomere maintenance | DNA helicase activity | DNA repair	NA	NA	NA	NA	NA			NA
147374	LG10	20098999	20105948	g40899	LG10 AUGUSTUS gene 20098999 20105948 0.09 + .	NA	NA	6.85			NA	NA	NA	NA	NA	NA	NA	NA			NA
147389	LG10	20106768	20115244	g40900	PREDICTED: uncharacterized protein LOC104094881 [Nicotiana tomentosiformis]	NA	NA	6.85	Ubiquitin family	Ubiquitin-like domain	NA	NA	protein binding	NA	NA	NA	NA	NA			NA
148005	LG10	20356890	20360186	g40927	PREDICTED: uncharacterized protein LOC104099466 [Nicotiana tomentosiformis]	NA	0.27	NA			NA	NA	NA	NA	NA	NA	NA	NA			NA
148020	LG10	20362122	20363025	g40928	LG10 AUGUSTUS gene 20362122 20363025 0.02 - .	NA	0.27	8.42			NA	NA	NA	NA	NA	NA	NA	NA			NA
148031	LG10	20368060	20374054	g40929	PREDICTED: lipoyl synthase, chloroplastic [Nicotiana sylvestris]	NA	0.27	8.42	Radical SAM superfamily	Radical SAM	NA	NA	catalytic activity | iron-sulfur cluster binding	NA	NA	NA	NA	NA			AT5G08415.1 | Symbols: | Radical SAM superfamily protein
148060	LG10	20374388	20375085	g40930	PREDICTED: uncharacterized protein LOC104100112 [Nicotiana tomentosiformis]	NA	0.27	8.42			NA	NA	NA	NA	NA	NA	NA	NA			NA
148068	LG10	20377856	20378335	g40931	PREDICTED: uncharacterized protein LOC104100112 [Nicotiana tomentosiformis]	NA	0.27	8.42			NA	NA	NA	NA	NA	NA	NA	NA			AT1G19020.1 | Symbols: | unknown protein; BEST Arabidopsis thaliana protein match is: unknown protein (TAIR:AT3G48180.1); Has 88 Blast hits to 88 proteins in 15 species: Archae - 0; Bacteria - 0; Metazoa - 0; Fungi - 0; Plants - 88; Viruses - 0; Other Eukaryotes - 0 (source: NCBI BLink).
148076	LG10	20379499	20380255	g40932	LG10 AUGUSTUS gene 20379499 20380255 0.27 - .	NA	0.27	8.42			NA	NA	NA	NA	NA	NA	NA	NA			NA
148087	LG10	20393820	20395075	g40933	PREDICTED: metalloendoproteinase 1-like [Nicotiana tomentosiformis]	NA	0.27	8.42	Matrixin	Peptidase M10, metallopeptidase	NA	NA	metalloendopeptidase activity | proteolysis | zinc ion binding | extracellular matrix	NA	NA	NA	NA	NA			AT1G70170.1 | Symbols: MMP | matrix metalloproteinase
148095	LG10	20400295	20405085	g40934	PREDICTED: uncharacterized protein LOC101251915 [Solanum lycopersicum]	NA	0.27	8.42			NA	NA	NA	NA	NA	NA	NA	NA			AT4G23160.1 | Symbols: CRK8 | cysteine-rich RLK (RECEPTOR-like protein kinase) 8
148130	LG10	20406700	20408919	g40935	PREDICTED: F-box protein FBW2-like [Nicotiana sylvestris]	NA	0.27	8.42			NA	NA	NA	NA	NA	NA	NA	NA			NA
148150	LG10	20412217	20417835	g40936	PREDICTED: uncharacterized protein LOC102604101 [Solanum tuberosum]	NA	0.27	8.42			NA	NA	NA	NA	NA	NA	NA	NA			ATMG00860.1 | Symbols: ORF158 | DNA/RNA polymerases superfamily protein
148176	LG10	20429550	20431610	g40937	PREDICTED: F-box/WD repeat-containing protein pof1-like [Nicotiana tomentosiformis]	NA	0.27	8.42	WD domain, G-beta repeat	WD40 repeat	NA	NA	protein binding	NA	NA	NA	NA	NA			AT1G24130.1 | Symbols: | Transducin/WD40 repeat-like superfamily protein
148187	LG10	20437490	20450255	g40938	PREDICTED: uncharacterized protein LOC104085490, partial [Nicotiana tomentosiformis]	NA	NA	8.42	Reverse transcriptase-like	Ribonuclease H domain	NA	NA	nucleic acid binding | RNA-DNA hybrid ribonuclease activity	NA	NA	NA	NA	NA			AT5G42905.1 | Symbols: | Polynucleotidyl transferase, ribonuclease H-like superfamily protein
148230	LG10	20454125	20459095	g40939	PREDICTED: protein N-lysine methyltransferase METTL21A [Sesamum indicum]	NA	NA	8.42,6.12			NA	NA	NA	NA	NA	NA	NA	NA			AT1G08125.2 | Symbols: | S-adenosyl-L-methionine-dependent methyltransferases superfamily protein
148263	LG10	20469340	20471523	g40940	LG10 AUGUSTUS gene 20469340 20471523 0.1 + .	NA	NA	8.42,6.12			NA	NA	NA	NA	NA	NA	NA	NA			NA
148280	LG10	20471898	20473455	g40941	LG10 AUGUSTUS gene 20471898 20473455 0.04 - .	NA	NA	8.42,6.12			NA	NA	NA	NA	NA	NA	NA	NA			NA
148292	LG10	20476753	20478235	g40942	LG10 AUGUSTUS gene 20476753 20478235 0.29 - .	NA	NA	8.42,6.12			NA	NA	NA	NA	NA	NA	NA	NA			NA
148303	LG10	20481290	20487776	g40943	Integrase core domain containing protein [Solanum demissum]	NA	NA	8.42,6.12			NA	NA	NA	NA	NA	NA	NA	NA			AT4G23160.1 | Symbols: CRK8 | cysteine-rich RLK (RECEPTOR-like protein kinase) 8
148336	LG10	20488055	20493115	g40944	PREDICTED: microtubule-associated protein TORTIFOLIA1-like isoform X1 [Sesamum indicum]	NA	NA	8.42,6.12			NA	NA	NA	NA	NA	NA	NA	NA			NA
148345	LG10	20495290	20499985	g40945	PREDICTED: uncharacterized protein LOC104237273 [Nicotiana sylvestris]	NA	NA	8.42,6.12			NA	NA	NA	NA	NA	NA	NA	NA			AT1G70180.1 | Symbols: | Sterile alpha motif (SAM) domain-containing protein
148377	LG10	20511715	20512650	g40946	PREDICTED: zinc finger protein 5-like [Solanum lycopersicum]	NA	NA	8.42,6.12			NA	NA	NA	NA	NA	NA	NA	NA			AT1G67030.1 | Symbols: ZFP6 | zinc finger protein 6
148385	LG10	20516515	20519318	g40947	PREDICTED: uncharacterized protein LOC104246284 [Nicotiana sylvestris]	NA	NA	8.42,6.12			NA	NA	NA	NA	NA	NA	NA	NA			NA
148408	LG10	20524003	20538890	g40948	LG10 AUGUSTUS gene 20524003 20538890 0.04 - .	NA	NA	8.42,6.12			NA	NA	NA	NA	NA	NA	NA	NA			NA
148418	LG10	20540895	20546156	g40949	PREDICTED: IAA-amino acid hydrolase ILR1-like 2 [Nicotiana tomentosiformis]	NA	NA	8.42,6.12	Peptidase family M20/M25/M40	Peptidase M20	NA	NA	hydrolase activity	NA	NA	NA	NA	NA			AT1G51760.1 | Symbols: IAR3, JR3 | peptidase M20/M25/M40 family protein
148444	LG10	20547060	20551570	g40950	PREDICTED: uncharacterized protein LOC105167219 [Sesamum indicum]	NA	NA	8.42,6.12	Reverse transcriptase-like	Ribonuclease H domain	NA	NA	nucleic acid binding | RNA-DNA hybrid ribonuclease activity	NA	NA	NA	NA	NA			AT4G29090.1 | Symbols: | Ribonuclease H-like superfamily protein
148473	LG10	20551670	20552290	g40951	LG10 AUGUSTUS gene 20551670 20552290 0.11 - .	NA	NA	8.42,6.12			NA	NA	NA	NA	NA	NA	NA	NA			NA
148481	LG10	20553521	20555280	g40952	PREDICTED: uncharacterized protein LOC101249354 [Solanum lycopersicum]	NA	NA	8.42,6.12			NA	NA	NA	NA	NA	NA	NA	NA			AT1G19330.2 | Symbols: | unknown protein; FUNCTIONS IN: molecular_function unknown; INVOLVED IN: biological_process unknown; LOCATED IN: cellular_component unknown; EXPRESSED IN: 22 plant structures; EXPRESSED DURING: 13 growth stages; BEST Arabidopsis thaliana protein match is: unknown protein (TAIR:AT1G75060.1); Has 145 Blast hits to 145 proteins in 43 species: Archae - 0; Bacteria - 0; Metazoa…
148495	LG10	20556425	20557308	g40953	LG10 AUGUSTUS gene 20556425 20557308 0.15 + .	NA	NA	8.42,6.12			NA	NA	NA	NA	NA	NA	NA	NA			NA
148503	LG10	20557535	20559294	g40954	PREDICTED: ribosome biogenesis protein WDR12 homolog isoform X1 [Solanum tuberosum]	NA	NA	6.12			NA	NA	NA	NA	NA	NA	NA	NA			AT5G15550.2 | Symbols: | Transducin/WD40 repeat-like superfamily protein
148520	LG10	20560325	20560839	g40955	PREDICTED: anaphase-promoting complex subunit 8 [Solanum lycopersicum]	NA	NA	6.12			NA	NA	NA	NA	NA	NA	NA	NA			NA
148528	LG10	20569075	20572397	g40956	PREDICTED: uncharacterized protein At4g28440-like [Nicotiana tomentosiformis]	NA	NA	6.12			NA	NA	NA	K07466	RFA1, RPA1, rpa; replication factor A1	A09120 Genetic Information Processing	09124 Replication and repair	03030 DNA replication [PATH:ko03030]			AT1G23750.1 | Symbols: | Nucleic acid-binding, OB-fold-like protein
148540	LG10	20577853	20578940	g40957	LG10 AUGUSTUS gene 20577853 20578940 0.41 - .	NA	NA	6.12			NA	NA	NA	NA	NA	NA	NA	NA			NA
148548	LG10	20584401	20584950	g40958	LG10 AUGUSTUS gene 20584401 20584950 0.81 - .	NA	NA	6.12			NA	NA	NA	NA	NA	NA	NA	NA			NA
148556	LG10	20585878	20586250	g40959	LG10 AUGUSTUS gene 20585878 20586250 0.27 - .	NA	NA	6.12			NA	NA	NA	NA	NA	NA	NA	NA			NA
148564	LG10	20598791	20600160	g40960	LG10 AUGUSTUS gene 20598791 20600160 0.08 - .	NA	NA	6.12			NA	NA	NA	NA	NA	NA	NA	NA			NA
148579	LG10	20617355	20620050	g40961	PREDICTED: UDP-glycosyltransferase 74B1-like [Solanum tuberosum]	NA	NA	6.12			NA	NA	NA	NA	NA	NA	NA	NA			AT1G24100.1 | Symbols: UGT74B1 | UDP-glucosyl transferase 74B1
148596	LG10	20638315	20640367	g40962	PREDICTED: UDP-glycosyltransferase 74B1-like [Solanum tuberosum]	NA	NA	6.12	UDP-glucoronosyl and UDP-glucosyl transferase	UDP-glucuronosyl/UDP-glucosyltransferase	NA	NA	UDP-glycosyltransferase activity	K11820	UGT74B1; N-hydroxythioamide S-beta-glucosyltransferase [EC:2.4.1.195]	A09100 Metabolism	09105 Amino acid metabolism	00380 Tryptophan metabolism [PATH:ko00380]			AT1G24100.1 | Symbols: UGT74B1 | UDP-glucosyl transferase 74B1
148607	LG10	20641360	20648830	g40963	PREDICTED: DNA polymerase beta isoform X1 [Nicotiana tomentosiformis]	NA	NA	6.12			NA	NA	NA	NA	NA	NA	NA	NA			AT1G10520.1 | Symbols: | DNA polymerase lambda (POLL)
148886	LG10	20733078	20736442	g40974	PREDICTED: WAT1-related protein At1g70260-like [Nicotiana tomentosiformis]	NA	NA	5.21			NA	NA	NA	NA	NA	NA	NA	NA			AT1G70260.1 | Symbols: | nodulin MtN21 /EamA-like transporter family protein
148898	LG10	20737921	20739302	g40975	PREDICTED: WAT1-related protein At1g70260-like [Nicotiana tomentosiformis]	NA	NA	5.21			NA	NA	NA	NA	NA	NA	NA	NA			AT1G70260.1 | Symbols: | nodulin MtN21 /EamA-like transporter family protein
148912	LG10	20746656	20747392	g40976	Polyprotein, putative [Solanum demissum]	NA	NA	5.21			NA	NA	NA	NA	NA	NA	NA	NA			NA
148923	LG10	20750487	20752319	g40977	LG10 AUGUSTUS gene 20750487 20752319 0.02 + .	NA	NA	5.21			NA	NA	NA	NA	NA	NA	NA	NA			NA
148941	LG10	20777207	20777899	g40978	LG10 AUGUSTUS gene 20777207 20777899 0.22 + .	NA	NA	5.21			NA	NA	NA	NA	NA	NA	NA	NA			NA
148955	LG10	20790531	20792522	g40979	LG10 AUGUSTUS gene 20790531 20792522 0.02 - .	NA	NA	5.56,5.21			NA	NA	NA	NA	NA	NA	NA	NA			NA
148975	LG10	20794929	20796722	g40980	PREDICTED: uncharacterized protein LOC104247173 [Nicotiana sylvestris]	NA	NA	5.56,5.21			NA	NA	NA	NA	NA	NA	NA	NA			NA
148992	LG10	20797279	20825352	g40981	PREDICTED: uncharacterized protein At1g04910 isoform X2 [Nicotiana sylvestris]	NA	NA	5.56,5.21			NA	NA	NA	NA	NA	NA	NA	NA			AT1G29200.1 | Symbols: | O-fucosyltransferase family protein
149130	LG10	20826237	20830239	g40982	LG10 AUGUSTUS gene 20826237 20830239 0.01 + .	NA	NA	5.56,5.21			NA	NA	NA	NA	NA	NA	NA	NA			NA
149143	LG10	20833890	20835222	g40983	LG10 AUGUSTUS gene 20833890 20835222 0.05 - .	NA	NA	5.56,5.21			NA	NA	NA	NA	NA	NA	NA	NA			NA
149154	LG10	20847429	20849182	g40984	LG10 AUGUSTUS gene 20847429 20849182 0.09 + .	NA	NA	5.56,5.21			NA	NA	NA	NA	NA	NA	NA	NA			NA
149169	LG10	20871119	20874778	g40985	PREDICTED: transcription factor LHW-like [Nicotiana tomentosiformis]	NA	NA	5.56,5.21			NA	NA	NA	NA	NA	NA	NA	NA			AT1G60060.1 | Symbols: | Serine/threonine-protein kinase WNK (With No Lysine)-related
149192	LG10	20879470	20881464	g40986	PREDICTED: paired amphipathic helix protein Sin3-like 3 [Nicotiana sylvestris]	NA	NA	5.56,5.21			NA	NA	NA	NA	NA	NA	NA	NA			NA
149206	LG10	20887829	20893574	g40987	LG10 AUGUSTUS gene 20887829 20893574 0.03 + .	NA	NA	5.56,5.21			NA	NA	NA	NA	NA	NA	NA	NA			NA
149216	LG10	20900929	20906938	g40988	PREDICTED: RING-H2 finger protein ATL46-like [Solanum tuberosum]	NA	NA	5.56,5.21			NA	NA	NA	NA	NA	NA	NA	NA			AT5G40250.1 | Symbols: | RING/U-box superfamily protein
149226	LG10	20910204	20911264	g40989	Polyprotein, putative [Solanum demissum]	NA	NA	5.56,5.21			NA	NA	NA	NA	NA	NA	NA	NA			NA
149237	LG10	20916449	20917385	g40990	PREDICTED: armadillo repeat-containing protein 8-like [Solanum tuberosum]	NA	NA	5.56			NA	NA	NA	NA	NA	NA	NA	NA			AT1G51350.1 | Symbols: | ARM repeat superfamily protein
149245	LG10	20921036	20933944	g40991	PREDICTED: AP-1 complex subunit gamma-2-like [Nicotiana sylvestris]	NA	NA	5.56	Adaptin C-terminal domain; Adaptin N terminal region	Clathrin adaptor, alpha/beta/gamma-adaptin, appendage, Ig-like subdomain; Clathrin/coatomer adaptor, adaptin-like, N-terminal	NA	NA	intracellular protein transport | vesicle-mediated transport	K12391	AP1G1; AP-1 complex subunit gamma-1	A09140 Cellular Processes	09141 Transport and catabolism	04142 Lysosome [PATH:ko04142]			AT1G60070.1 | Symbols: | Adaptor protein complex AP-1, gamma subunit
149313	LG10	20938118	20942244	g40992	PREDICTED: uncharacterized protein LOC104246050 [Nicotiana sylvestris]	NA	NA	5.56	Reverse transcriptase-like	Ribonuclease H domain	NA	NA	nucleic acid binding | RNA-DNA hybrid ribonuclease activity	NA	NA	NA	NA	NA			AT4G29090.1 | Symbols: | Ribonuclease H-like superfamily protein
149333	LG10	20947579	20957533	g40993	PREDICTED: uncharacterized protein LOC104086618 [Nicotiana tomentosiformis]	NA	NA	5.56	Reverse transcriptase-like	Ribonuclease H domain	NA	NA	nucleic acid binding | RNA-DNA hybrid ribonuclease activity	NA	NA	NA	NA	NA			AT4G29090.1 | Symbols: | Ribonuclease H-like superfamily protein
149352	LG10	20961332	20965304	g40994	PREDICTED: uncharacterized protein LOC104100399 isoform X1 [Nicotiana tomentosiformis]	NA	NA	5.56	NHL repeat	NHL repeat	NA	NA	protein binding	NA	NA	NA	NA	NA			AT1G70280.2 | Symbols: | NHL domain-containing protein
149387	LG10	20977311	20980834	g40995	PREDICTED: probable alpha,alpha-trehalose-phosphate synthase [UDP-forming] 9 [Solanum lycopersicum]	NA	NA	5.56	Trehalose-phosphatase	Trehalose-phosphatase	NA	NA	catalytic activity | trehalose biosynthetic process	K16055	TPS; trehalose 6-phosphate synthase/phosphatase [EC:2.4.1.15 3.1.3.12]	A09100 Metabolism	09101 Carbohydrate metabolism	00500 Starch and sucrose metabolism [PATH:ko00500]			AT1G23870.1 | Symbols: ATTPS9, TPS9 | trehalose-phosphatase/synthase 9
149401	LG10	20981503	20984934	g40996	LG10 AUGUSTUS gene 20981503 20984934 0.02 - .	NA	NA	5.56			NA	NA	NA	NA	NA	NA	NA	NA			NA
149411	LG10	21015607	21023084	g40997	PREDICTED: potassium transporter 6-like isoform X2 [Nicotiana tomentosiformis]	NA	NA	4.74	K+ potassium transporter	Potassium transporter	NA	NA	potassium ion transmembrane transporter activity | membrane | potassium ion transmembrane transport	NA	NA	NA	NA	NA			AT1G70300.1 | Symbols: KUP6 | K+ uptake permease 6
149441	LG10	21041246	21041669	g40998	LG10 AUGUSTUS gene 21041246 21041669 0.47 + .	NA	NA	4.74			NA	NA	NA	NA	NA	NA	NA	NA			NA
149449	LG10	21050780	21051891	g40999	LG10 AUGUSTUS gene 21050780 21051891 0.04 - .	NA	NA	4.74			NA	NA	NA	NA	NA	NA	NA	NA			NA
149460	LG10	21070076	21074101	g41000	spermidine synthase [Solanum tuberosum]	NA	NA	4.74			NA	NA	NA	K00797	speE, SRM, SPE3; spermidine synthase [EC:2.5.1.16]	A09100 Metabolism	09105 Amino acid metabolism	00270 Cysteine and methionine metabolism [PATH:ko00270]			AT1G23820.1 | Symbols: SPDS1 | spermidine synthase 1
149492	LG10	21088432	21102691	g41001	PREDICTED: uncharacterized protein LOC105155556 [Sesamum indicum]	NA	NA	4.74	SWIM zinc finger	Zinc finger, SWIM-type	NA	NA	zinc ion binding	NA	NA	NA	NA	NA			AT4G23160.1 | Symbols: CRK8 | cysteine-rich RLK (RECEPTOR-like protein kinase) 8
149545	LG10	21104666	21108727	g41002	PREDICTED: U4/U6 small nuclear ribonucleoprotein Prp31 [Sesamum indicum]	NA	NA	4.74			NA	NA	NA	K12844	PRPF31; U4/U6 small nuclear ribonucleoprotein PRP31	A09120 Genetic Information Processing	09121 Transcription	03040 Spliceosome [PATH:ko03040]			AT1G60170.1 | Symbols: emb1220 | pre-mRNA processing ribonucleoprotein binding region-containing protein
149574	LG10	21109503	21109981	g41003	LG10 AUGUSTUS gene 21109503 21109981 0.25 - .	NA	NA	4.74			NA	NA	NA	NA	NA	NA	NA	NA			NA
149582	LG10	21110860	21111541	g41004	LG10 AUGUSTUS gene 21110860 21111541 0.07 - .	NA	NA	4.74			NA	NA	NA	NA	NA	NA	NA	NA			NA
149590	LG10	21113123	21114841	g41005	Polyprotein, putative [Solanum demissum]	NA	NA	4.74			NA	NA	NA	NA	NA	NA	NA	NA			NA
149607	LG10	21119156	21127882	g41006	putative polyprotein [Solanum lycopersicum]	NA	NA	4.74	Integrase core domain	Integrase, catalytic core	DNA integration	NA	DNA integration	NA	NA	NA	NA	NA			AT4G23160.1 | Symbols: CRK8 | cysteine-rich RLK (RECEPTOR-like protein kinase) 8
149648	LG10	21130834	21135141	g41007	PREDICTED: zinc finger BED domain-containing protein RICESLEEPER 2-like [Nicotiana sylvestris]	NA	NA	6.12,4.74	hAT family C-terminal dimerisation region; BED zinc finger	HAT, C-terminal dimerisation domain; Zinc finger, BED-type	NA	NA	protein dimerization activity	NA	NA	NA	NA	NA			AT3G42170.1 | Symbols: | BED zinc finger ;hAT family dimerisation domain
149669	LG10	21143172	21146481	g41008	PREDICTED: probable xyloglucan endotransglucosylase/hydrolase protein 33 [Nicotiana tomentosiformis]	NA	NA	6.12,4.74	Xyloglucan endo-transglycosylase (XET) C-terminus; Glycosyl hydrolases family 16	Xyloglucan endo-transglycosylase, C-terminal; Glycoside hydrolase family 16	NA	NA	cell wall | cellular glucan metabolic process | xyloglucan:xyloglucosyl transferase activity | apoplast	K08235	E2.4.1.207; xyloglucan:xyloglucosyl transferase [EC:2.4.1.207]	A09190 Not Included in Pathway or Brite	09191 Unclassified: metabolism	99980 Enzymes with EC numbers			AT1G10550.1 | Symbols: XTH33, XET | xyloglucan:xyloglucosyl transferase 33
149686	LG10	21152459	21153121	g41009	LG10 AUGUSTUS gene 21152459 21153121 0.07 - .	NA	NA	6.12,4.74			NA	NA	NA	NA	NA	NA	NA	NA			NA
149694	LG10	21155046	21159129	g41010	PREDICTED: LOW QUALITY PROTEIN: uncharacterized protein LOC104223244 [Nicotiana sylvestris]	NA	NA	6.12,4.74			NA	NA	NA	NA	NA	NA	NA	NA			ATMG00810.1 | Symbols: ORF240B | DNA/RNA polymerases superfamily protein
149714	LG10	21165310	21168041	g41011	PREDICTED: 40S ribosomal protein S2-3-like [Nicotiana tomentosiformis]	NA	NA	6.12,4.74	Ribosomal protein S5, N-terminal domain; Ribosomal protein S5, C-terminal domain	Ribosomal protein S5, N-terminal; Ribosomal protein S5, C-terminal	NA	NA	RNA binding | structural constituent of ribosome | ribosome | translation	K02981	RP-S2e, RPS2; small subunit ribosomal protein S2e	A09120 Genetic Information Processing	09122 Translation	03010 Ribosome [PATH:ko03010]			AT2G41840.1 | Symbols: | Ribosomal protein S5 family protein
149725	LG10	21170855	21172861	g41012	Integrase core domain containing protein [Solanum demissum]	NA	NA	6.12,4.74			NA	NA	NA	NA	NA	NA	NA	NA			AT4G23160.1 | Symbols: CRK8 | cysteine-rich RLK (RECEPTOR-like protein kinase) 8
149740	LG10	21175022	21185781	g41013	PREDICTED: RNA-binding protein 25-like isoform X1 [Solanum tuberosum]	NA	NA	6.12,4.74	PWI domain; RNA recognition motif. (a.k.a. RRM, RBD, or RNP domain)	PWI domain; RNA recognition motif domain	NA	NA	mRNA processing	K12822	RBM25, S164; RNA-binding protein 25	A09120 Genetic Information Processing	09121 Transcription	03040 Spliceosome [PATH:ko03040]			AT1G60200.1 | Symbols: | splicing factor PWI domain-containing protein / RNA recognition motif (RRM)-containing protein
149776	LG10	21199196	21199747	g41014	LG10 AUGUSTUS gene 21199196 21199747 0.04 - .	NA	NA	6.12,4.74			NA	NA	NA	NA	NA	NA	NA	NA			NA
149784	LG10	21203062	21203943	g41015	PREDICTED: zinc finger protein 3-like [Sesamum indicum]	NA	NA	6.12,4.74			NA	NA	NA	NA	NA	NA	NA	NA			NA
149792	LG10	21204782	21205563	g41016	PREDICTED: uncharacterized protein LOC104220837 [Nicotiana sylvestris]	NA	NA	6.12			NA	NA	NA	NA	NA	NA	NA	NA			AT1G34070.1 | Symbols: | CONTAINS InterPro DOMAIN/s: Retrotransposon gag protein (InterPro:IPR005162); BEST Arabidopsis thaliana protein match is: unknown protein (TAIR:AT5G48050.1); Has 648 Blast hits to 647 proteins in 29 species: Archae - 0; Bacteria - 0; Metazoa - 16; Fungi - 25; Plants - 607; Viruses - 0; Other Eukaryotes - 0 (source: NCBI BLink).
149803	LG10	21207110	21212457	g41017	PREDICTED: uncharacterized protein LOC104221396 [Nicotiana sylvestris]	NA	NA	6.12			NA	NA	NA	NA	NA	NA	NA	NA			ATMG00820.1 | Symbols: ORF170 | Reverse transcriptase (RNA-dependent DNA polymerase)
149830	LG10	21213069	21216587	g41018	PREDICTED: uncharacterized protein LOC102581051 [Solanum tuberosum]	NA	NA	6.12			NA	NA	NA	NA	NA	NA	NA	NA			ATMG00860.1 | Symbols: ORF158 | DNA/RNA polymerases superfamily protein
149856	LG10	21216832	21217452	g41019	LG10 AUGUSTUS gene 21216832 21217452 0.1 + .	NA	NA	6.12			NA	NA	NA	NA	NA	NA	NA	NA			NA
149864	LG10	21218482	21220018	g41020	PREDICTED: uncharacterized protein LOC104099639 [Nicotiana tomentosiformis]	NA	NA	6.12			NA	NA	NA	NA	NA	NA	NA	NA			AT4G23160.1 | Symbols: CRK8 | cysteine-rich RLK (RECEPTOR-like protein kinase) 8
149875	LG10	21222912	21227508	g41021	LG10 AUGUSTUS gene 21222912 21227508 0.06 + .	NA	NA	6.12			NA	NA	NA	NA	NA	NA	NA	NA			NA
149886	LG10	21231512	21233060	g41022	PREDICTED: uncharacterized protein LOC104088862, partial [Nicotiana tomentosiformis]	NA	NA	6.12			NA	NA	NA	NA	NA	NA	NA	NA			AT1G34070.1 | Symbols: | CONTAINS InterPro DOMAIN/s: Retrotransposon gag protein (InterPro:IPR005162); BEST Arabidopsis thaliana protein match is: unknown protein (TAIR:AT5G48050.1); Has 648 Blast hits to 647 proteins in 29 species: Archae - 0; Bacteria - 0; Metazoa - 16; Fungi - 25; Plants - 607; Viruses - 0; Other Eukaryotes - 0 (source: NCBI BLink).
149900	LG10	21236012	21241274	g41023	LG10 AUGUSTUS gene 21236012 21241274 0.03 + .	NA	NA	6.12			NA	NA	NA	NA	NA	NA	NA	NA			NA
149926	LG10	21241392	21241944	g41024	LG10 AUGUSTUS gene 21241392 21241944 0.27 + .	NA	NA	6.12			NA	NA	NA	NA	NA	NA	NA	NA			NA
149934	LG10	21245862	21246477	g41025	LG10 AUGUSTUS gene 21245862 21246477 0.05 + .	NA	NA	6.12			NA	NA	NA	NA	NA	NA	NA	NA			NA
149942	LG10	21252142	21259489	g41026	PREDICTED: protein ECERIFERUM 1-like [Nicotiana tomentosiformis]	NA	NA	6.12	Fatty acid hydroxylase superfamily	Fatty acid hydroxylase	NA	NA	iron ion binding | lipid biosynthetic process | oxidoreductase activity | oxidation-reduction process	NA	NA	NA	NA	NA			NA
149980	LG10	21262321	21263147	g41027	PREDICTED: uncharacterized protein LOC104085422 [Nicotiana tomentosiformis]	NA	NA	6.12			NA	NA	NA	NA	NA	NA	NA	NA			AT4G20520.1 | Symbols: | RNA binding;RNA-directed DNA polymerases
149988	LG10	21264873	21271437	g41028	PREDICTED: deoxynucleoside triphosphate triphosphohydrolase SAMHD1 homolog isoform X1 [Sesamum indicum]	NA	NA	6.12			NA	NA	NA	K22544	SAMHD1; deoxynucleoside triphosphate triphosphohydrolase SAMHD1 [EC:3.1.5.-]	A09160 Human Diseases	09172 Infectious disease: viral	05170 Human immunodeficiency virus 1 infection [PATH:ko05170]			AT5G40270.1 | Symbols: | HD domain-containing metal-dependent phosphohydrolase family protein
150056	LG10	21272332	21273327	g41029	LG10 AUGUSTUS gene 21272332 21273327 0.06 - .	NA	NA	6.12			NA	NA	NA	NA	NA	NA	NA	NA			NA
150070	LG10	21273991	21278347	g41030	LG10 AUGUSTUS gene 21273991 21278347 0.01 - .	NA	NA	6.12			NA	NA	NA	NA	NA	NA	NA	NA			NA
150090	LG10	21283129	21287467	g41031	Putative gag-pol polyprotein, identical [Solanum demissum]	NA	NA	6.12	Integrase core domain	Integrase, catalytic core	DNA integration	NA	DNA integration	NA	NA	NA	NA	NA			AT4G23160.1 | Symbols: CRK8 | cysteine-rich RLK (RECEPTOR-like protein kinase) 8
150101	LG10	21289569	21290637	g41032	PREDICTED: agamous-like MADS-box protein AGL80 [Sesamum indicum]	NA	NA	6.12	SRF-type transcription factor (DNA-binding and dimerisation domain)	Transcription factor, MADS-box	NA	NA	DNA binding | protein dimerization activity	NA	NA	NA	NA	NA			AT1G31640.1 | Symbols: AGL92 | AGAMOUS-like 92
150112	LG10	21311202	21312399	g41033	PREDICTED: uncharacterized protein LOC102594521 [Solanum tuberosum]	NA	NA	6.12			NA	NA	NA	NA	NA	NA	NA	NA			AT5G24600.1 | Symbols: | Protein of unknown function, DUF599
150129	LG10	21316891	21318157	g41034	LG10 AUGUSTUS gene 21316891 21318157 0.03 - .	NA	NA	6.12			NA	NA	NA	NA	NA	NA	NA	NA			AT1G65680.1 | Symbols: ATEXPB2, EXPB2, ATHEXP BETA 1.4 | expansin B2
150149	LG10	21320846	21323917	g41035	PREDICTED: uncharacterized protein LOC102582147 isoform X1 [Solanum tuberosum]	NA	NA	6.12			NA	NA	NA	NA	NA	NA	NA	NA			AT1G20870.1 | Symbols: | HSP20-like chaperones superfamily protein
150723	LG10	21604049	21604554	g41067	PREDICTED: LOW QUALITY PROTEIN: uncharacterized protein LOC104223244 [Nicotiana sylvestris]	NA	NA	5.99			NA	NA	NA	NA	NA	NA	NA	NA			ATMG00810.1 | Symbols: ORF240B | DNA/RNA polymerases superfamily protein
150731	LG10	21604747	21606334	g41068	PREDICTED: zinc finger protein 5-like [Solanum lycopersicum]	NA	NA	5.99			NA	NA	NA	NA	NA	NA	NA	NA			AT1G67030.1 | Symbols: ZFP6 | zinc finger protein 6
150742	LG10	21615396	21622544	g41069	PREDICTED: uncharacterized protein LOC104237273 [Nicotiana sylvestris]	NA	NA	5.99			NA	NA	NA	NA	NA	NA	NA	NA			AT1G70180.1 | Symbols: | Sterile alpha motif (SAM) domain-containing protein
150769	LG10	21633681	21638914	g41070	PREDICTED: uncharacterized protein LOC102600516 [Solanum tuberosum]	NA	NA	5.99	SAM domain (Sterile alpha motif)	Sterile alpha motif domain	NA	NA	protein binding	NA	NA	NA	NA	NA			AT1G70180.2 | Symbols: | Sterile alpha motif (SAM) domain-containing protein
150813	LG10	21650579	21652512	g41071	PREDICTED: F-box protein FBW2-like [Nicotiana sylvestris]	NA	NA	5.99			NA	NA	NA	NA	NA	NA	NA	NA			NA
150827	LG10	21652975	21654734	g41072	LG10 AUGUSTUS gene 21652975 21654734 0.21 - .	NA	NA	5.99			NA	NA	NA	NA	NA	NA	NA	NA			NA
150841	LG10	21655758	21659534	g41073	PREDICTED: uncharacterized protein LOC101249054 [Solanum lycopersicum]	NA	NA	5.99			NA	NA	NA	NA	NA	NA	NA	NA			NA
150882	LG10	21665309	21665798	g41074	LG10 AUGUSTUS gene 21665309 21665798 0.14 + .	NA	NA	5.99			NA	NA	NA	NA	NA	NA	NA	NA			NA
150890	LG10	21675147	21677204	g41075	PREDICTED: F-box/WD repeat-containing protein pof1-like [Nicotiana tomentosiformis]	NA	NA	5.99	WD domain, G-beta repeat	WD40 repeat	NA	NA	protein binding	NA	NA	NA	NA	NA			AT1G24130.1 | Symbols: | Transducin/WD40 repeat-like superfamily protein
150904	LG10	21691080	21692944	g41076	PREDICTED: F-box protein FBW2-like [Nicotiana sylvestris]	NA	NA	5.99			NA	NA	NA	NA	NA	NA	NA	NA			NA
150913	LG10	21695249	21696494	g41077	PREDICTED: uncharacterized protein LOC104100573 [Nicotiana tomentosiformis]	NA	NA	5.99			NA	NA	NA	NA	NA	NA	NA	NA			NA
150927	LG10	21697299	21699443	g41078	Putative polyprotein, identical [Solanum demissum]	NA	NA	5.99			NA	NA	NA	NA	NA	NA	NA	NA			ATMG00810.1 | Symbols: ORF240B | DNA/RNA polymerases superfamily protein
150944	LG10	21708293	21709534	g41079	PREDICTED: metalloendoproteinase 1-like [Nicotiana tomentosiformis]	NA	NA	5.99	Matrixin	Peptidase M10, metallopeptidase	NA	NA	metalloendopeptidase activity | proteolysis | zinc ion binding | extracellular matrix	NA	NA	NA	NA	NA			AT1G24140.1 | Symbols: | Matrixin family protein
150952	LG10	21724946	21725484	g41080	PREDICTED: uncharacterized protein LOC104100112 [Nicotiana tomentosiformis]	NA	NA	5.99			NA	NA	NA	NA	NA	NA	NA	NA			AT1G19020.1 | Symbols: | unknown protein; BEST Arabidopsis thaliana protein match is: unknown protein (TAIR:AT3G48180.1); Has 88 Blast hits to 88 proteins in 15 species: Archae - 0; Bacteria - 0; Metazoa - 0; Fungi - 0; Plants - 88; Viruses - 0; Other Eukaryotes - 0 (source: NCBI BLink).
150960	LG10	21730276	21730849	g41081	PREDICTED: uncharacterized protein LOC104100112 [Nicotiana tomentosiformis]	NA	NA	5.99			NA	NA	NA	NA	NA	NA	NA	NA			AT1G19020.1 | Symbols: | unknown protein; BEST Arabidopsis thaliana protein match is: unknown protein (TAIR:AT3G48180.1); Has 88 Blast hits to 88 proteins in 15 species: Archae - 0; Bacteria - 0; Metazoa - 0; Fungi - 0; Plants - 88; Viruses - 0; Other Eukaryotes - 0 (source: NCBI BLink).
150968	LG10	21731163	21737381	g41082	PREDICTED: lipoyl synthase, chloroplastic [Nicotiana sylvestris]	NA	NA	5.99	Radical SAM superfamily	Radical SAM	NA	NA	catalytic activity | iron-sulfur cluster binding	K03644	lipA, LIAS, LIP1, LIP5; lipoyl synthase [EC:2.8.1.8]	A09100 Metabolism	09108 Metabolism of cofactors and vitamins	00785 Lipoic acid metabolism [PATH:ko00785]			AT5G08415.1 | Symbols: | Radical SAM superfamily protein
150997	LG10	21738695	21740511	g41083	PREDICTED: uncharacterized protein LOC104220785 [Nicotiana sylvestris]	NA	NA	5.99			NA	NA	NA	NA	NA	NA	NA	NA			AT5G39210.1 | Symbols: CRR7 | chlororespiratory reduction 7
151011	LG10	21744281	21744801	g41084	PREDICTED: uncharacterized protein LOC104100112 [Nicotiana tomentosiformis]	NA	NA	5.99			NA	NA	NA	NA	NA	NA	NA	NA			NA
151019	LG10	21746313	21754161	g41085	PREDICTED: uncharacterized protein LOC102581051 [Solanum tuberosum]	NA	NA	5.99			NA	NA	NA	NA	NA	NA	NA	NA			AT1G43760.1 | Symbols: | DNAse I-like superfamily protein
151069	LG10	21754229	21768601	g41086	PREDICTED: putative pre-mRNA-splicing factor ATP-dependent RNA helicase PRP1 isoform X1 [Nicotiana tomentosiformis]	NA	NA	5.99	Helicase associated domain (HA2); DEAD/DEAH box helicase	Helicase-associated domain; DEAD/DEAH box helicase domain	helicase activity	NA	helicase activity	K12818	DHX8, PRP22; ATP-dependent RNA helicase DHX8/PRP22 [EC:3.6.4.13]	A09120 Genetic Information Processing	09121 Transcription	03040 Spliceosome [PATH:ko03040]			AT1G27900.1 | Symbols: | RNA helicase family protein
151141	LG10	21769576	21772368	g41087	PREDICTED: non-functional NADPH-dependent codeinone reductase 2-like [Nicotiana sylvestris]	NA	NA	5.99			NA	NA	NA	K22374	DMAS1; 3''-deamino-3''-oxonicotianamine reductase [EC:1.1.1.285]	A09190 Not Included in Pathway or Brite	09191 Unclassified: metabolism	99980 Enzymes with EC numbers			AT1G59960.1 | Symbols: | NAD(P)-linked oxidoreductase superfamily protein
151158	LG10	21772386	21776421	g41088	PREDICTED: zinc finger MYND domain-containing protein 15 isoform X1 [Solanum lycopersicum]	NA	NA	5.99			NA	NA	NA	NA	NA	NA	NA	NA			AT1G70150.1 | Symbols: | zinc ion binding
151190	LG10	21777353	21778551	g41089	LG10 AUGUSTUS gene 21777353 21778551 0.23 - .	NA	NA	5.99			NA	NA	NA	NA	NA	NA	NA	NA			NA
151204	LG10	21778666	21784554	g41090	PREDICTED: uncharacterized protein LOC104221303 [Nicotiana sylvestris]	NA	NA	5.99	Reverse transcriptase-like	Ribonuclease H domain	NA	NA	nucleic acid binding | RNA-DNA hybrid ribonuclease activity	NA	NA	NA	NA	NA			AT4G29090.1 | Symbols: | Ribonuclease H-like superfamily protein
151242	LG10	21787776	21793872	g41091	PREDICTED: uncharacterized protein LOC104221303 [Nicotiana sylvestris]	NA	NA	5.99			NA	NA	NA	NA	NA	NA	NA	NA			AT4G29090.1 | Symbols: | Ribonuclease H-like superfamily protein
151275	LG10	21794176	21796510	g41092	PREDICTED: putative late blight resistance protein homolog R1B-16-like [Solanum tuberosum]	NA	NA	5.99			NA	NA	NA	NA	NA	NA	NA	NA			AT4G23160.1 | Symbols: CRK8 | cysteine-rich RLK (RECEPTOR-like protein kinase) 8
151824	LG10	22028437	22030827	g41118	PREDICTED: putative pentatricopeptide repeat-containing protein At1g12700, mitochondrial-like isoform X1 [Solanum tuberosum]	NA	0.27	NA			NA	NA	NA	NA	NA	NA	NA	NA			AT1G12700.1 | Symbols: | ATP binding;nucleic acid binding;helicases
151832	LG10	22037862	22039832	g41119	LG10 AUGUSTUS gene 22037862 22039832 0.13 - .	NA	0.29,0.27	NA			NA	NA	NA	NA	NA	NA	NA	NA			NA
151846	LG10	22050447	22054121	g41120	PREDICTED: protein FAR1-RELATED SEQUENCE 9-like [Nicotiana sylvestris]	NA	0.3,0.29,0.29,0.27	NA	SWIM zinc finger	Zinc finger, SWIM-type	NA	NA	zinc ion binding	NA	NA	NA	NA	NA			AT4G38180.1 | Symbols: FRS5 | FAR1-related sequence 5
151855	LG10	22055403	22059643	g41121	LG10 AUGUSTUS gene 22055403 22059643 0.06 - .	NA	0.3,0.29,0.29,0.27	NA			NA	NA	NA	NA	NA	NA	NA	NA			NA
151876	LG10	22060348	22062902	g41122	LG10 AUGUSTUS gene 22060348 22062902 0.01 + .	NA	0.3,0.29,0.29,0.29,0.27	4.92			NA	NA	NA	NA	NA	NA	NA	NA			NA
151903	LG10	22065478	22071469	g41123	Putative gag-pol polyprotein, identical [Solanum demissum]	NA	0.3,0.29,0.29,0.29,0.27	4.92			NA	NA	NA	NA	NA	NA	NA	NA			NA
151936	LG10	22072608	22078837	g41124	PREDICTED: uncharacterized protein LOC104090116 isoform X1 [Nicotiana tomentosiformis]	NA	0.3,0.29,0.29,0.29,0.29,0.27	4.92			NA	NA	NA	NA	NA	NA	NA	NA			AT1G64570.1 | Symbols: DUO3 | Homeodomain-like superfamily protein
151977	LG10	22078866	22085183	g41125	PREDICTED: TMV resistance protein N-like [Nicotiana sylvestris]	NA	0.3,0.29,0.29,0.29,0.29,0.27	4.92	NB-ARC domain; TIR domain	NB-ARC; Toll/interleukin-1 receptor homology (TIR) domain	signal transduction	NA	ADP binding	NA	NA	NA	NA	NA			AT1G27170.1 | Symbols: | transmembrane receptors;ATP binding
151997	LG10	22088268	22090854	g41126	PREDICTED: LOW QUALITY PROTEIN: pentatricopeptide repeat-containing protein At1g62670, mitochondrial-like [Nicotiana sylvestris]	NA	0.3,0.29,0.29,0.29,0.29,0.29,0.27	4.92			NA	NA	NA	NA	NA	NA	NA	NA			AT1G12700.1 | Symbols: | ATP binding;nucleic acid binding;helicases
152005	LG10	22101749	22103103	g41127	PREDICTED: fasciclin-like arabinogalactan protein 1 [Nicotiana tomentosiformis]	NA	0.3,0.29,0.29,0.29,0.29,0.29,0.27	4.92			NA	NA	NA	NA	NA	NA	NA	NA			AT5G55730.2 | Symbols: FLA1 | FASCICLIN-like arabinogalactan 1
152014	LG10	22108378	22110986	g41128	PREDICTED: uncharacterized protein LOC104218391 [Nicotiana sylvestris]	NA	0.3,0.29,0.29,0.29,0.29,0.29,0.27	4.92			NA	NA	NA	NA	NA	NA	NA	NA			NA
152037	LG10	22116145	22116883	g41129	PREDICTED: TMV resistance protein N-like [Nicotiana sylvestris]	NA	0.3,0.29,0.29,0.29,0.29,0.29	4.92	TIR domain	Toll/interleukin-1 receptor homology (TIR) domain	signal transduction	NA	protein binding | signal transduction	NA	NA	NA	NA	NA			AT1G72930.2 | Symbols: TIR | toll/interleukin-1 receptor-like
152045	LG10	22117258	22122154	g41130	PREDICTED: LOW QUALITY PROTEIN: pentatricopeptide repeat-containing protein At1g62670, mitochondrial-like [Nicotiana sylvestris]	NA	0.3,0.29,0.29,0.29,0.29	4.92			NA	NA	NA	NA	NA	NA	NA	NA			AT1G63130.1 | Symbols: | Tetratricopeptide repeat (TPR)-like superfamily protein
152065	LG10	22126929	22131933	g41131	LG10 AUGUSTUS gene 22126929 22131933 0.07 - .	NA	0.3,0.29,0.29,0.29,0.29	4.92			NA	NA	NA	NA	NA	NA	NA	NA			NA
152077	LG10	22133688	22134170	g41132	LG10 AUGUSTUS gene 22133688 22134170 0.21 + .	NA	0.29,0.29,0.29,0.29	4.92			NA	NA	NA	NA	NA	NA	NA	NA			NA
152085	LG10	22141410	22142003	g41133	PREDICTED: uncharacterized protein LOC104086621 [Nicotiana tomentosiformis]	NA	0.29,0.29,0.29,0.29	4.92			NA	NA	NA	NA	NA	NA	NA	NA			ATMG00820.1 | Symbols: ORF170 | Reverse transcriptase (RNA-dependent DNA polymerase)
152093	LG10	22143198	22145662	g41134	LG10 AUGUSTUS gene 22143198 22145662 0.01 + .	NA	0.29,0.29,0.29	4.92			NA	NA	NA	NA	NA	NA	NA	NA			NA
152107	LG10	22146818	22155373	g41135	LG10 AUGUSTUS gene 22146818 22155373 0.01 + .	NA	0.29,0.29	4.92			NA	NA	NA	NA	NA	NA	NA	NA			NA
152146	LG10	22158598	22166015	g41136	PREDICTED: mediator of RNA polymerase II transcription subunit 12 isoform X1 [Sesamum indicum]	NA	0.29,0.29	4.92			NA	NA	NA	NA	NA	NA	NA	NA			NA
152191	LG10	22168182	22169913	g41137	PREDICTED: NAC domain-containing protein 78 [Solanum lycopersicum]	NA	0.29	4.92	No apical meristem (NAM) protein	NAC domain	NA	NA	DNA binding | regulation of transcription, DNA-templated	NA	NA	NA	NA	NA			AT3G10490.1 | Symbols: ANAC051 | NAC domain containing protein 52
152208	LG10	22172175	22179913	g41138	PREDICTED: TMV resistance protein N-like [Solanum tuberosum]	NA	0.29	4.92	TIR domain	Toll/interleukin-1 receptor homology (TIR) domain	signal transduction	NA	protein binding | signal transduction	NA	NA	NA	NA	NA			AT1G63860.2 | Symbols: | Disease resistance protein (TIR-NBS-LRR class) family
152241	LG10	22182209	22183763	g41139	PREDICTED: probable membrane-associated kinase regulator 6 [Nicotiana sylvestris]	NA	NA	4.92			NA	NA	NA	NA	NA	NA	NA	NA			AT5G52900.1 | Symbols: | unknown protein; Has 30201 Blast hits to 17322 proteins in 780 species: Archae - 12; Bacteria - 1396; Metazoa - 17338; Fungi - 3422; Plants - 5037; Viruses - 0; Other Eukaryotes - 2996 (source: NCBI BLink).
152249	LG10	22185907	22190223	g41140	Polyprotein, putative [Solanum demissum]	NA	NA	4.92			NA	NA	NA	NA	NA	NA	NA	NA			ATMG00810.1 | Symbols: ORF240B | DNA/RNA polymerases superfamily protein
[truncated: 9,535 more rows]

## Sheet: Table 8
Supplementary Table 8 Genes supported by at least two metrics and highlighted in the Manhattan plot
[truncated: 22 more rows]
